# Supplementary material for: Assessment of eight insulin resistance surrogate indexes for predicting metabolic syndrome and hypertension in Thai law enforcement officers
Source: PeerJ. 2023 May 29;11:e15463. doi: 10.7717/peerj.15463 (PMC10234272; doi:10.7717/peerj.15463)
Supplement: Supplemental Information 7 [file peerj-11-15463-s007.xlsx]

## Sheet: Checkup 7852 code
Code	Age	Sex (Male 1, Female 0)	Age48 (1≥48, 0<48)	MetS	HT	AIPQ	LAPQ	METIRQ	TGHDLQ	TyGQ	TyGBMIQ	TyGWCQ	VIAQ
1	51	1	1	0	1	1	2	1	1	2	2	2	1
2	57	0	1	1	1	0	1	2	0	0	2	1	0
3	57	0	1	1	0	2	2	3	2	1	2	1	2
4	41	1	0	0	0	1	2	2	1	0	2	2	1
5	45	0	0	0	0	2	1	0	2	1	0	0	2
6	45	1	0	0	1	3	3	0	3	3	0	2	3
7	51	1	1	0	0	0	0	0	0	0	0	0	0
8	45	1	0	0	0	0	1	0	0	0	0	0	0
9	35	0	0	1	0	1	1	1	1	1	0	0	2
10	36	1	0	0	0	0	0	0	0	0	0	0	0
11	49	1	1	1	1	3	3	3	3	3	3	3	2
12	51	1	1	0	0	2	1	1	2	2	1	1	2
13	43	1	0	1	1	2	2	1	2	1	0	2	2
14	42	1	0	0	0	0	0	1	0	0	1	1	0
15	39	1	0	1	1	3	3	3	3	3	3	3	3
16	39	0	0	0	0	1	1	1	1	0	1	0	2
17	57	1	1	1	1	3	3	2	3	3	1	2	3
18	50	1	1	0	1	2	1	1	2	2	0	1	2
19	47	0	0	0	1	0	0	0	0	0	0	0	0
20	46	0	0	1	1	2	3	3	2	3	3	3	3
21	42	1	0	0	1	1	1	2	1	1	1	1	1
22	42	0	0	0	0	0	1	0	0	0	0	0	1
23	41	1	0	0	0	2	2	2	2	1	2	1	2
24	39	1	0	0	0	0	0	0	0	0	0	1	0
25	38	1	0	0	1	1	0	0	1	1	1	0	0
26	50	1	1	0	0	0	0	0	0	0	0	0	0
27	48	1	1	1	0	2	2	3	2	2	3	3	2
28	47	1	0	1	0	3	3	3	3	3	3	3	3
29	44	1	0	0	1	1	0	0	1	1	0	0	1
30	47	1	0	0	1	0	0	1	0	0	1	0	0
31	38	0	0	0	0	1	1	0	1	2	1	0	2
32	36	1	0	0	1	0	0	0	0	0	0	0	0
33	38	0	0	0	0	0	1	0	0	0	0	0	0
34	43	0	0	0	0	0	0	0	0	0	0	0	0
35	35	1	0	0	1	1	1	0	1	1	0	0	0
36	39	0	0	0	1	1	1	1	0	0	1	1	1
37	53	1	1	1	0	3	3	3	3	3	3	3	3
38	55	1	1	0	1	0	0	0	0	0	0	0	0
39	54	1	1	0	1	3	3	3	3	3	3	2	3
40	53	1	1	0	0	0	0	0	0	0	0	0	0
41	41	1	0	0	1	0	0	0	0	0	0	0	0
42	41	1	0	0	0	1	1	1	1	1	2	1	1
43	50	1	1	1	1	1	3	2	1	3	2	3	1
44	50	1	1	0	0	2	2	2	2	2	3	2	2
45	51	1	1	0	0	0	0	0	0	0	0	0	0
46	41	1	0	1	1	1	2	3	1	1	3	3	1
47	52	1	1	1	1	0	2	3	0	0	3	3	0
48	49	1	1	0	1	3	3	2	3	3	3	3	3
49	50	1	1	0	0	2	0	1	2	1	1	0	2
50	50	1	1	0	0	0	0	0	0	0	0	0	0
51	52	1	1	0	0	2	2	2	2	1	2	2	2
52	48	1	1	0	0	3	2	2	3	2	2	2	3
53	51	1	1	0	1	0	1	0	0	1	0	1	0
54	43	1	0	0	0	1	0	1	1	1	2	1	0
55	44	1	0	0	0	2	2	2	2	2	2	2	2
56	45	1	0	1	1	3	3	3	3	3	3	3	3
57	48	1	1	1	1	2	2	2	2	3	2	2	2
58	39	1	0	0	1	1	0	1	1	0	0	0	1
59	50	1	1	0	0	0	0	0	0	0	0	0	0
60	37	1	0	0	1	3	3	2	3	3	2	2	3
61	54	1	1	0	1	1	2	0	1	2	1	1	1
62	45	1	0	0	0	0	0	1	0	0	1	0	0
63	44	1	0	1	1	2	2	2	2	3	2	3	2
64	42	1	0	0	0	1	0	0	0	0	0	0	0
65	47	1	0	0	0	0	0	0	0	0	0	0	0
66	38	1	0	0	1	1	2	1	1	2	1	2	1
67	44	1	0	0	1	0	1	1	0	1	1	1	0
68	50	1	1	0	0	2	2	3	2	2	3	3	2
69	44	1	0	0	1	0	0	0	0	0	0	0	0
70	48	1	1	1	1	3	3	2	3	3	2	2	3
71	36	1	0	0	0	2	2	1	2	2	0	1	2
72	39	1	0	0	0	0	0	0	0	0	0	0	0
73	42	1	0	0	0	0	1	1	0	0	1	2	0
74	47	1	0	1	0	3	3	3	3	3	3	3	3
75	46	1	0	0	1	2	1	2	2	1	1	1	1
76	50	1	1	1	1	2	2	0	2	3	1	2	2
77	50	1	1	1	1	1	3	2	1	2	3	3	1
78	42	1	0	0	1	3	3	3	3	3	3	2	3
79	45	1	0	1	1	3	2	3	3	3	2	2	3
80	39	1	0	0	1	2	3	3	2	1	3	3	2
81	47	1	0	0	0	1	1	0	1	1	1	1	1
82	50	1	1	0	1	0	1	1	0	0	1	2	0
83	49	1	1	1	1	3	3	3	3	3	3	2	3
84	49	1	1	1	0	2	0	1	2	3	1	0	2
85	53	1	1	0	0	3	3	2	3	3	3	2	3
86	51	1	1	0	0	0	0	1	0	0	1	0	0
87	38	1	0	0	1	0	1	2	0	1	2	2	0
88	48	1	1	0	0	1	1	0	1	1	0	1	1
89	51	1	1	1	0	2	3	2	2	2	2	3	2
90	48	1	1	0	0	3	3	2	3	2	2	2	3
91	53	1	1	1	0	1	0	1	1	0	0	0	1
92	41	1	0	0	1	3	0	3	3	2	3	0	2
93	44	1	0	0	0	0	0	0	0	0	0	0	0
94	41	1	0	0	0	3	3	3	3	3	2	2	3
95	45	1	0	1	1	3	3	3	3	3	3	3	3
96	48	1	1	0	0	1	0	1	1	1	1	0	0
97	37	0	0	0	0	0	0	0	0	0	0	0	0
98	38	0	0	0	0	2	3	1	2	3	2	3	3
99	43	0	0	0	1	1	1	1	1	1	1	0	2
100	38	0	0	0	0	0	0	0	0	0	0	0	0
101	43	0	0	1	0	1	3	2	1	1	2	3	2
102	46	0	0	0	0	0	0	0	0	0	0	0	0
103	47	0	0	0	0	0	1	2	0	0	2	0	1
104	40	0	0	0	0	0	0	0	0	0	0	0	0
105	37	0	0	0	0	0	0	0	0	0	0	0	0
106	45	0	0	0	1	0	0	0	0	0	0	0	0
107	38	1	0	0	0	1	1	1	1	1	1	1	1
108	38	1	0	0	1	0	0	0	0	0	0	0	0
109	39	0	0	0	0	0	0	0	0	0	0	0	0
110	35	0	0	0	1	1	1	0	1	1	0	0	2
111	36	0	0	0	0	0	0	0	0	0	0	0	0
112	36	1	0	1	0	2	3	1	2	2	2	3	2
113	37	0	0	0	0	0	1	0	0	0	0	0	0
114	36	1	0	1	1	2	2	2	2	2	2	2	2
115	36	0	0	0	0	0	0	0	0	0	0	0	1
116	35	0	0	0	0	0	0	0	0	0	0	0	0
117	36	0	0	0	0	0	0	0	0	0	0	0	1
118	35	0	0	0	1	0	1	0	0	0	0	0	0
119	36	1	0	0	0	3	3	2	3	1	2	2	3
120	40	0	0	0	1	1	3	1	1	1	1	2	2
121	52	1	1	0	0	0	0	0	0	0	0	1	0
122	42	0	0	0	0	1	1	1	1	1	1	0	2
123	36	0	0	1	0	0	0	0	0	0	0	0	1
124	37	1	0	1	0	2	2	2	2	3	3	2	2
125	56	0	1	0	1	0	0	0	0	0	0	0	0
126	42	1	0	1	1	3	2	2	3	2	1	1	3
127	47	1	0	1	1	1	3	2	1	2	2	3	1
128	35	0	0	0	0	1	2	1	1	1	2	0	1
129	46	1	0	0	1	2	0	1	2	1	0	0	2
130	35	0	0	0	0	0	1	1	0	0	1	1	0
131	46	0	0	0	0	0	0	0	0	0	1	0	1
132	39	1	0	0	0	0	0	1	0	0	1	1	0
133	41	1	0	0	0	1	2	1	1	2	2	2	1
134	47	1	0	0	1	0	0	1	0	0	1	1	0
135	40	1	0	0	0	0	1	2	0	0	2	1	0
136	40	1	0	0	0	2	2	2	2	2	3	2	2
137	37	1	0	0	0	0	0	0	0	0	0	0	0
138	46	0	0	0	0	0	0	0	0	0	0	0	0
139	45	1	0	0	0	2	1	1	2	1	1	1	2
140	56	1	1	0	0	3	2	1	3	2	1	2	3
141	50	1	1	0	1	1	0	1	1	0	0	0	1
142	35	1	0	0	0	1	2	2	1	2	3	3	1
143	47	1	0	0	0	2	1	1	2	1	1	1	2
144	44	1	0	0	1	0	1	1	0	0	1	1	0
145	41	1	0	1	1	3	3	3	3	3	3	3	3
146	46	0	0	0	0	0	0	0	0	0	0	0	0
147	46	0	0	0	0	1	1	1	1	0	1	0	1
148	43	0	0	0	0	0	1	1	0	0	1	0	0
149	35	0	0	0	0	2	2	1	2	1	1	1	2
150	60	1	1	1	1	2	3	2	2	2	2	3	2
151	59	1	1	1	1	3	3	3	3	3	3	3	3
152	59	1	1	0	0	1	3	3	1	1	3	3	1
153	59	1	1	0	1	1	1	2	1	1	2	2	1
154	59	1	1	0	1	2	1	3	2	0	2	1	1
155	55	1	1	0	1	1	2	2	1	2	3	2	1
156	54	1	1	0	1	0	1	1	0	1	2	2	0
157	54	1	1	1	1	2	3	3	2	3	3	3	2
158	51	1	1	0	1	2	2	1	2	2	2	1	2
159	52	1	1	0	1	0	0	1	0	0	0	0	0
160	51	1	1	0	0	2	0	0	2	2	0	0	2
161	48	1	1	0	1	0	1	1	0	0	2	2	0
162	48	1	1	0	1	0	1	1	0	0	1	1	0
163	49	1	1	0	0	2	2	3	2	1	3	2	2
164	49	1	1	0	0	1	1	2	1	0	1	1	1
165	48	1	1	1	0	3	3	3	3	3	2	3	3
166	51	1	1	0	0	1	1	1	1	1	1	1	1
167	43	0	0	0	0	2	2	2	2	1	2	1	2
168	49	1	1	0	1	0	1	0	0	1	1	1	0
169	51	1	1	1	0	3	3	3	3	2	3	3	3
170	52	1	1	1	1	0	1	3	0	0	3	2	0
171	50	1	1	0	0	1	1	1	1	1	1	1	1
172	50	1	1	0	0	2	1	2	2	2	1	1	2
173	50	1	1	0	1	1	2	3	1	0	3	3	0
174	44	1	0	1	1	3	3	2	3	3	2	3	3
175	46	1	0	0	0	0	1	1	0	0	1	1	0
176	45	1	0	0	0	1	2	2	1	1	2	3	1
177	50	1	1	0	0	3	3	2	3	2	1	2	3
178	47	1	0	0	0	0	0	1	0	0	0	0	0
179	50	1	1	0	0	2	2	2	2	1	2	2	2
180	47	1	0	1	1	0	2	3	0	1	3	3	0
181	44	1	0	0	0	0	0	0	0	0	0	0	1
182	45	1	0	0	0	2	2	2	2	1	2	2	2
183	43	1	0	0	0	2	0	1	2	1	0	0	2
184	43	1	0	0	1	2	1	1	2	2	0	1	2
185	44	1	0	1	0	3	3	3	3	3	3	3	3
186	43	1	0	0	1	0	0	0	0	1	1	1	0
187	41	1	0	0	0	0	0	0	0	0	0	0	0
188	37	1	0	0	1	1	2	3	1	0	2	3	1
189	36	1	0	0	1	2	1	0	2	1	0	1	2
190	36	1	0	0	1	2	1	0	2	1	1	1	2
191	40	1	0	0	0	1	0	1	1	1	1	1	1
192	35	1	0	1	1	3	3	3	3	3	3	3	3
193	38	0	0	0	1	2	3	1	2	2	1	1	3
194	60	1	1	0	1	1	2	1	1	1	1	2	1
195	58	1	1	0	1	2	3	3	2	1	3	3	2
196	56	1	1	0	0	2	3	3	2	2	3	3	2
197	57	1	1	0	0	1	1	0	1	1	0	0	1
198	56	1	1	0	1	2	2	2	2	2	3	2	1
199	44	1	0	1	1	3	2	2	3	3	2	2	3
200	41	1	0	0	0	1	1	2	1	0	1	1	1
201	50	1	1	0	1	1	2	2	1	1	2	2	1
202	50	1	1	1	0	3	2	3	3	2	2	1	2
203	36	1	0	0	0	2	2	2	2	2	3	2	2
204	39	1	0	0	1	0	0	0	0	0	0	0	0
205	40	1	0	0	1	3	3	3	3	3	3	2	3
206	50	1	1	0	0	3	3	2	3	3	2	2	3
207	37	1	0	0	1	1	0	1	1	0	1	0	1
208	42	1	0	0	0	2	2	3	2	1	3	2	2
209	42	1	0	0	0	1	2	3	1	3	3	3	1
210	43	1	0	0	1	1	1	3	1	1	3	1	0
211	54	1	1	0	1	2	1	1	2	2	1	1	2
212	58	0	1	0	0	0	0	0	0	0	0	0	0
213	44	1	0	0	0	3	3	2	3	3	2	2	3
214	38	1	0	0	0	0	0	0	0	0	0	0	0
215	47	1	0	1	1	1	3	3	1	2	3	3	1
216	45	0	0	1	1	1	1	2	1	1	2	1	2
217	36	1	0	0	0	0	1	2	0	0	1	1	0
218	48	0	1	0	1	0	1	1	0	0	1	0	1
219	35	1	0	0	0	1	1	1	1	1	1	1	1
220	40	1	0	0	0	0	1	2	0	0	2	2	0
221	55	1	1	0	0	3	3	1	3	3	1	2	3
222	52	1	1	0	0	1	0	1	1	1	1	1	0
223	53	1	1	1	1	2	3	3	2	2	3	3	3
224	50	1	1	1	1	2	2	3	2	3	3	2	2
225	50	1	1	1	1	2	3	3	2	3	3	3	2
226	41	1	0	0	1	0	1	2	0	0	1	1	0
227	46	1	0	0	1	0	1	0	0	0	1	2	0
228	45	1	0	0	0	1	1	1	1	2	1	1	1
229	39	0	0	0	0	1	1	0	1	2	0	0	2
230	41	0	0	0	0	0	0	1	0	0	1	0	1
231	39	0	0	0	0	1	0	0	1	1	0	0	1
232	41	0	0	0	0	0	0	0	0	0	0	0	0
233	45	0	0	0	0	0	0	0	0	0	0	0	1
234	42	0	0	0	0	0	0	0	0	0	0	0	0
235	35	0	0	0	0	0	0	1	0	0	2	0	0
236	48	0	1	1	1	2	3	3	2	3	3	3	2
237	41	0	0	0	0	0	1	0	0	1	1	0	1
238	37	0	0	0	0	0	1	1	0	0	1	0	1
239	37	1	0	1	1	2	3	3	2	2	3	3	2
240	56	0	1	0	0	1	1	1	1	1	1	0	1
241	45	0	0	0	0	1	1	1	1	0	1	1	1
242	39	0	0	0	0	0	0	0	0	0	0	0	1
243	38	0	0	0	0	0	1	2	0	0	2	1	0
244	44	0	0	0	0	0	0	0	0	0	0	0	0
245	41	0	0	0	0	0	1	2	0	0	2	0	1
246	41	0	0	0	0	0	0	0	0	0	0	0	0
247	44	0	0	1	1	2	3	2	2	3	3	3	3
248	36	0	0	0	0	0	0	0	0	0	0	0	0
249	60	1	1	0	1	0	1	0	0	2	0	1	0
250	60	1	1	0	0	2	0	1	2	2	1	0	2
251	60	1	1	0	1	0	0	0	0	0	0	0	0
252	58	1	1	1	1	3	3	3	3	3	3	3	3
253	60	1	1	1	0	2	3	3	2	3	3	3	2
254	60	1	1	1	1	2	2	3	2	3	3	3	2
255	60	1	1	0	1	2	3	2	2	3	2	3	2
256	45	1	0	0	0	2	1	2	2	2	1	1	2
257	35	1	0	1	1	2	3	2	2	2	2	3	2
258	57	1	1	0	1	2	3	3	2	2	3	3	2
259	56	0	1	0	0	0	1	0	0	0	0	0	1
260	56	0	1	1	1	0	2	3	0	1	3	3	1
261	56	0	1	1	0	1	2	1	1	2	2	1	2
262	55	1	1	1	1	0	2	3	0	1	3	3	0
263	54	1	1	1	1	2	3	3	2	2	3	3	2
264	54	1	1	0	1	2	2	3	2	2	3	3	2
265	54	1	1	1	1	2	2	2	2	2	2	2	2
266	55	1	1	0	0	1	2	1	1	2	2	2	1
267	54	1	1	0	0	1	0	1	1	1	1	1	1
268	54	1	1	0	1	1	1	1	1	1	1	2	1
269	54	0	1	0	0	1	2	1	1	2	2	0	2
270	53	0	1	1	1	3	3	3	3	2	3	3	3
271	53	1	1	0	0	1	0	0	1	1	0	0	1
272	53	1	1	1	1	3	3	3	3	3	3	3	3
273	54	1	1	0	0	3	2	2	3	2	1	2	3
274	53	1	1	1	1	2	1	3	2	2	2	2	2
275	52	1	1	1	0	3	2	3	3	3	3	2	3
276	53	1	1	0	0	2	2	2	2	1	2	3	2
277	53	1	1	0	1	2	3	3	2	2	3	3	2
278	53	1	1	1	0	3	3	3	3	3	2	3	3
279	53	1	1	1	0	3	3	2	3	3	2	2	3
280	53	1	1	1	0	3	2	2	3	2	1	2	3
281	53	0	1	1	1	3	2	1	3	2	1	0	3
282	50	1	1	0	1	0	0	0	0	0	0	0	0
283	44	1	0	0	0	1	3	3	1	2	3	3	1
284	48	0	1	0	0	1	2	2	1	1	2	1	1
285	39	0	0	0	0	0	0	0	0	0	0	0	0
286	41	0	0	0	0	1	3	1	1	1	2	2	2
287	35	1	0	1	1	2	3	3	2	2	3	3	2
288	42	1	0	1	1	3	3	3	3	3	3	3	3
289	48	1	1	1	1	3	3	3	3	3	3	3	3
290	41	0	0	0	1	0	0	0	0	0	0	0	0
291	46	0	0	0	1	0	0	1	0	0	1	0	0
292	51	0	1	0	0	0	1	1	0	1	1	1	1
293	47	0	0	0	0	0	1	1	0	0	2	1	1
294	47	1	0	1	1	2	3	1	2	3	3	3	3
295	44	1	0	1	1	3	3	2	3	3	2	3	3
296	51	1	1	0	1	2	2	3	2	1	3	2	2
297	37	1	0	0	1	1	1	1	1	1	1	1	1
298	49	0	1	0	0	0	0	0	0	0	0	0	0
299	49	0	1	1	1	3	3	3	3	3	2	2	3
300	50	0	1	0	1	0	1	0	0	1	1	0	1
301	46	0	0	0	1	0	0	1	0	0	1	0	1
302	45	0	0	0	1	1	1	1	1	1	1	0	2
303	39	0	0	0	0	0	0	0	0	0	0	0	1
304	45	0	0	0	0	0	0	0	0	0	0	0	0
305	51	1	1	1	1	3	3	3	3	3	3	3	3
306	49	1	1	1	1	2	3	3	2	3	3	3	2
307	52	1	1	0	0	2	2	2	2	2	2	2	2
308	40	1	0	1	1	2	3	2	2	2	3	3	2
309	42	0	0	0	1	0	1	3	0	0	3	1	0
310	36	0	0	0	0	1	2	0	1	2	0	0	2
311	46	1	0	1	1	2	3	2	2	2	3	3	2
312	51	1	1	1	1	3	3	2	3	3	1	2	3
313	52	1	1	1	0	3	2	3	3	3	3	3	3
314	38	1	0	0	1	2	2	0	2	2	1	2	2
315	46	1	0	0	0	2	1	2	2	2	2	1	2
316	40	1	0	0	1	2	2	2	2	1	2	2	2
317	42	1	0	1	1	3	2	3	3	2	2	2	2
318	48	1	1	0	0	1	1	0	1	2	1	1	1
319	44	1	0	0	1	2	0	2	2	1	1	0	2
320	41	1	0	0	1	2	2	2	2	2	2	2	2
321	36	0	0	0	1	1	1	1	1	1	1	0	1
322	46	0	0	0	0	0	1	1	0	0	1	1	1
323	49	0	1	0	1	2	2	2	2	2	3	0	2
324	37	0	0	0	1	0	1	1	0	0	1	1	1
325	45	0	0	1	0	1	2	3	1	2	3	2	2
326	51	0	1	0	1	1	2	2	1	1	3	1	2
327	36	0	0	1	0	0	1	1	0	0	0	0	1
328	50	1	1	1	0	0	0	2	0	0	2	1	0
329	50	1	1	1	0	3	3	3	3	3	3	3	3
330	49	1	1	1	1	1	2	2	1	1	2	3	1
331	49	1	1	0	1	1	0	0	1	1	0	0	0
332	45	0	0	1	1	2	3	1	2	2	1	2	3
333	48	1	1	0	1	2	2	3	2	2	2	2	2
334	49	1	1	0	1	0	0	0	0	0	0	0	0
335	52	1	1	1	1	3	2	3	3	3	3	2	3
336	51	1	1	1	0	1	2	1	1	2	2	2	1
337	50	1	1	1	1	1	2	2	1	2	3	3	1
338	46	1	0	0	0	0	0	1	0	0	1	0	0
339	46	1	0	1	1	2	3	3	2	2	3	3	2
340	50	1	1	1	1	3	3	3	3	2	3	3	3
341	43	1	0	1	0	3	3	2	3	3	2	2	3
342	45	1	0	1	0	3	3	3	3	3	3	2	3
343	45	1	0	1	1	0	2	1	0	1	2	2	0
344	46	0	0	1	1	2	2	2	2	2	2	1	3
345	47	0	0	1	1	1	2	1	1	1	1	1	1
346	37	1	0	0	0	2	2	1	2	2	1	3	2
347	40	1	0	0	0	3	3	2	3	3	2	3	3
348	43	1	0	1	0	2	2	3	2	2	3	2	2
349	45	1	0	0	1	2	1	2	2	1	1	2	2
350	38	1	0	1	1	2	2	2	2	2	2	2	2
351	45	1	0	0	0	0	1	1	0	1	2	1	0
352	44	1	0	1	1	3	3	3	3	3	3	3	3
353	51	1	1	0	0	1	1	2	1	0	2	1	1
354	49	1	1	0	1	0	1	2	0	0	2	1	0
355	46	1	0	0	1	1	0	1	1	0	0	0	1
356	37	1	0	0	1	0	0	2	0	0	1	0	0
357	50	1	1	0	1	1	1	1	1	1	1	1	1
358	50	1	1	1	1	2	2	2	2	2	2	2	2
359	36	1	0	0	0	1	1	2	1	2	2	2	1
360	50	1	1	0	1	2	2	2	2	3	3	2	2
361	36	0	0	0	1	1	1	0	1	1	0	0	1
362	35	1	0	1	1	3	3	3	3	3	3	3	3
363	46	1	0	1	1	3	3	3	3	3	3	3	3
364	39	1	0	1	1	2	3	3	2	2	3	3	2
365	38	1	0	0	0	2	1	2	2	1	2	1	2
366	45	0	0	1	1	1	3	3	1	2	3	3	2
367	42	1	0	0	0	1	0	0	1	1	0	0	1
368	51	1	1	0	1	3	3	3	3	3	3	3	3
369	45	1	0	1	1	2	1	2	2	1	1	2	2
370	49	1	1	0	1	1	2	2	1	0	1	3	1
371	44	1	0	0	0	2	2	2	2	1	2	1	2
372	39	0	0	0	0	2	2	1	2	1	0	1	3
373	41	1	0	1	1	2	2	3	2	2	3	2	2
374	35	0	0	0	0	1	2	2	1	1	2	2	2
375	40	0	0	0	0	0	0	0	0	0	0	0	0
376	46	0	0	0	0	0	0	0	0	0	0	0	1
377	41	0	0	0	1	0	1	1	0	0	1	0	1
378	60	1	1	0	0	2	2	2	2	2	2	2	2
379	56	1	1	0	0	1	2	1	1	1	1	1	1
380	53	0	1	0	0	0	0	0	0	0	0	0	0
381	39	1	0	0	1	2	2	2	2	1	1	2	2
382	44	0	0	0	1	0	0	0	0	0	0	0	0
383	60	1	1	0	0	0	1	0	0	1	0	1	1
384	43	0	0	0	0	0	0	0	0	0	0	0	1
385	44	1	0	1	1	2	2	3	2	2	3	3	2
386	42	0	0	0	1	1	0	1	1	1	0	0	2
387	47	0	0	0	0	0	0	0	0	0	0	0	1
388	36	0	0	0	0	0	0	0	0	0	0	0	0
389	57	1	1	1	1	3	2	3	3	2	2	1	3
390	36	0	0	0	1	0	0	0	0	0	0	0	0
391	45	0	0	0	0	0	1	0	0	0	1	0	0
392	49	1	1	0	0	2	2	2	2	1	2	2	2
393	41	0	0	0	0	1	0	0	1	0	0	0	1
394	56	0	1	0	0	1	1	1	0	1	1	1	1
395	36	0	0	0	0	0	0	0	0	0	0	0	0
396	55	0	1	0	0	0	1	0	0	1	1	0	1
397	45	0	0	0	0	1	2	2	1	1	3	1	2
398	52	1	1	0	0	2	2	1	2	2	1	2	2
399	49	1	1	1	1	1	2	3	1	2	3	3	1
400	52	1	1	1	1	3	3	3	3	3	3	3	3
401	50	1	1	0	0	3	2	3	3	3	3	2	2
402	41	1	0	0	0	0	0	0	0	0	0	0	0
403	36	1	0	0	0	1	0	1	1	0	0	0	1
404	46	0	0	0	0	1	1	0	1	1	0	0	1
405	47	1	0	0	0	0	0	0	0	1	0	0	0
406	40	1	0	0	1	0	0	1	0	0	2	0	0
407	38	1	0	0	0	0	0	0	0	0	0	0	0
408	38	1	0	0	0	2	2	0	2	2	0	2	2
409	60	1	1	1	1	3	3	3	3	3	3	3	3
410	59	1	1	0	0	2	2	2	2	3	2	3	2
411	38	1	0	1	1	2	2	1	2	2	2	2	2
412	55	1	1	1	1	2	2	3	2	1	3	3	2
413	55	1	1	0	0	2	1	1	2	1	1	2	2
414	55	1	1	0	1	2	2	3	2	3	3	3	1
415	45	1	0	0	0	1	1	2	1	0	2	1	1
416	45	1	0	1	1	3	3	3	3	3	3	3	3
417	43	1	0	1	0	2	2	2	2	2	2	3	2
418	46	1	0	0	0	2	1	2	2	1	1	1	2
419	38	1	0	1	0	3	3	2	3	3	2	3	3
420	38	1	0	0	1	1	1	1	1	1	1	1	0
421	54	0	1	1	0	2	3	0	2	2	0	3	3
422	51	0	1	0	0	0	0	0	0	0	0	0	0
423	36	0	0	0	0	0	0	0	0	0	0	0	0
424	44	0	0	0	0	0	0	0	0	0	0	0	1
425	44	1	0	0	0	3	3	3	3	3	3	3	3
426	59	1	1	0	0	2	3	3	2	3	3	3	2
427	55	1	1	1	1	2	2	2	2	2	2	3	2
428	52	1	1	1	0	1	2	0	1	2	1	2	1
429	41	0	0	0	1	1	2	1	1	1	1	2	2
430	36	0	0	0	0	1	2	1	1	1	1	1	2
431	45	1	0	0	1	0	0	1	0	1	1	1	0
432	60	1	1	0	1	0	0	0	0	0	0	0	0
433	59	1	1	1	1	2	3	1	2	2	2	3	2
434	59	1	1	0	1	2	2	1	2	2	1	1	2
435	59	1	1	0	0	3	3	3	3	3	3	3	3
436	58	1	1	0	0	0	0	0	0	0	0	0	0
437	57	1	1	1	1	3	2	2	3	2	2	1	3
438	57	0	1	1	1	1	2	1	1	3	2	2	2
439	55	1	1	0	0	2	2	3	2	2	3	3	2
440	55	1	1	0	0	2	2	2	2	2	2	2	1
441	54	1	1	0	1	0	0	0	0	0	0	0	0
442	54	1	1	0	1	1	1	2	1	1	2	1	1
443	54	1	1	1	1	2	2	3	2	3	3	3	1
444	53	1	1	1	1	2	2	2	2	3	2	2	2
445	52	0	1	0	0	0	0	0	0	0	0	0	1
446	51	1	1	0	0	1	1	0	1	1	0	1	1
447	51	1	1	0	1	1	2	2	1	1	3	2	1
448	50	1	1	0	1	2	2	1	2	3	2	2	2
449	50	1	1	1	1	3	2	1	3	3	0	2	3
450	50	1	1	0	1	1	0	0	1	1	0	0	1
451	50	1	1	1	1	2	3	3	2	3	3	3	2
452	49	1	1	0	1	2	2	3	2	1	2	2	2
453	49	1	1	0	1	1	2	2	1	2	2	2	1
454	48	1	1	1	1	3	3	2	3	3	2	3	3
455	48	1	1	0	0	0	0	0	0	0	0	0	0
456	48	1	1	1	0	1	2	1	1	1	1	2	1
457	46	1	0	0	1	0	0	0	0	1	0	0	0
458	45	1	0	1	1	2	3	2	2	2	2	3	2
459	45	0	0	0	0	1	0	1	1	1	1	0	2
460	41	1	0	0	1	2	2	0	2	2	0	1	2
461	40	1	0	0	1	2	1	0	2	2	1	1	2
462	40	1	0	0	1	0	0	0	0	1	0	1	0
463	39	1	0	0	0	1	1	1	1	1	2	2	1
464	39	1	0	0	0	0	0	0	0	0	0	0	0
465	35	1	0	0	1	0	1	1	0	1	2	1	0
466	38	1	0	0	0	0	1	2	0	0	2	2	1
467	60	1	1	0	1	2	1	1	2	2	1	1	2
468	60	1	1	0	1	2	3	1	2	2	1	2	2
469	59	1	1	0	1	2	2	3	2	3	3	3	2
470	59	1	1	0	0	1	1	1	1	1	1	2	1
471	60	1	1	1	1	2	2	1	2	3	2	2	2
472	60	1	1	0	0	2	2	0	2	2	0	2	2
473	58	1	1	0	0	1	1	1	1	2	1	1	1
474	56	1	1	0	1	1	2	1	1	2	1	2	1
475	56	1	1	1	0	1	3	3	1	3	3	3	2
476	55	1	1	0	0	0	1	1	0	1	2	1	0
477	53	1	1	1	1	3	3	3	3	3	3	3	3
478	50	1	1	0	1	0	0	0	0	0	0	0	0
479	50	1	1	1	1	1	2	2	1	2	2	2	1
480	51	0	1	1	0	1	3	3	1	2	3	3	2
481	47	1	0	1	0	2	3	2	2	2	2	3	2
482	49	1	1	0	0	0	0	0	0	0	1	1	0
483	50	1	1	1	1	3	3	3	3	3	3	3	3
484	50	1	1	0	0	3	3	3	3	3	2	3	3
485	50	1	1	0	0	2	2	2	2	2	2	2	2
486	46	1	0	1	0	3	3	3	3	3	3	3	3
487	44	1	0	0	0	2	1	1	2	1	0	1	2
488	45	1	0	1	1	3	3	3	3	3	3	3	3
489	37	1	0	0	1	1	1	1	1	0	1	1	1
490	41	1	0	1	1	2	3	2	2	2	3	3	2
491	45	1	0	1	1	3	3	3	3	2	3	3	3
492	40	1	0	1	1	3	3	3	3	3	3	3	3
493	37	1	0	1	1	3	3	3	3	3	3	3	3
494	38	0	0	0	0	0	1	1	0	0	1	1	1
495	37	1	0	1	0	3	2	2	3	2	2	2	3
496	36	1	0	0	1	0	0	0	0	0	1	0	0
497	57	1	1	0	0	1	0	0	1	0	0	0	1
498	60	1	1	1	0	3	2	2	3	2	1	1	3
499	59	1	1	0	1	0	2	1	0	1	2	2	0
500	59	1	1	1	1	0	1	2	0	1	2	2	0
501	58	1	1	1	1	2	2	3	2	1	2	2	2
502	56	1	1	1	1	3	3	3	3	3	3	3	3
503	55	1	1	1	1	3	3	3	3	3	3	3	3
504	54	1	1	0	1	0	0	0	0	1	0	0	0
505	53	1	1	1	1	2	2	3	2	2	3	2	2
506	53	1	1	1	0	3	3	3	3	2	2	3	3
507	53	1	1	0	1	0	0	0	0	0	1	0	0
508	52	1	1	0	1	2	2	2	2	2	3	2	1
509	52	1	1	1	1	2	2	1	2	3	2	2	2
510	51	1	1	1	1	3	3	3	3	3	3	3	3
511	50	1	1	0	1	0	2	1	0	0	1	3	0
512	50	1	1	0	1	1	1	2	1	1	2	1	1
513	50	0	1	0	0	1	1	0	1	1	0	0	2
514	50	1	1	0	0	1	0	2	1	0	2	1	1
515	49	1	1	0	0	1	0	1	1	1	1	1	1
516	48	1	1	0	1	1	1	1	1	0	1	1	1
517	48	1	1	0	0	0	0	0	0	0	0	1	0
518	48	1	1	0	0	0	0	0	0	0	0	0	0
519	48	1	1	1	1	3	3	3	3	3	3	3	3
520	46	1	0	0	1	2	2	1	2	2	2	2	2
521	45	1	0	1	1	3	2	3	3	2	3	2	3
522	44	1	0	0	0	1	0	0	1	0	0	0	1
523	44	1	0	1	1	3	3	3	3	2	3	3	2
524	44	1	0	0	1	2	1	1	2	2	1	1	2
525	43	1	0	1	1	3	3	3	3	3	3	3	3
526	40	0	0	0	0	0	1	0	0	0	0	0	1
527	39	1	0	0	0	0	1	0	0	1	0	1	0
528	38	1	0	0	1	1	1	3	1	2	3	2	1
529	60	1	1	1	1	3	3	3	3	3	3	3	3
530	55	1	1	1	1	2	2	3	2	2	3	3	2
531	52	1	1	0	1	0	0	0	0	0	0	0	0
532	51	1	1	1	1	2	2	1	2	2	1	1	2
533	52	1	1	1	1	3	3	3	3	3	3	3	2
534	50	1	1	1	1	1	0	2	1	1	1	1	1
535	51	1	1	1	1	1	2	2	1	3	3	3	1
536	50	1	1	0	1	1	0	1	1	1	1	1	1
537	49	1	1	1	1	2	3	3	2	2	3	3	2
538	46	1	0	1	1	3	3	1	3	3	2	3	3
539	46	1	0	1	0	3	2	3	3	2	2	2	2
540	46	1	0	0	0	0	0	0	0	0	0	0	0
541	58	1	1	1	1	2	1	0	2	2	0	1	2
542	59	1	1	0	1	2	0	0	2	1	0	0	2
543	53	1	1	0	0	2	1	2	2	2	2	1	2
544	56	1	1	0	0	2	2	2	2	2	2	2	2
545	54	1	1	0	0	1	2	2	1	1	2	2	1
546	53	1	1	1	1	2	2	2	2	3	2	2	2
547	60	1	1	0	1	0	1	1	0	1	1	1	0
548	55	1	1	1	1	3	3	3	3	3	3	3	3
549	56	1	1	0	0	1	2	2	1	1	2	2	1
550	53	1	1	1	0	3	2	3	3	2	2	2	3
551	54	1	1	0	1	1	1	2	1	2	2	2	1
552	59	1	1	1	1	2	3	2	2	2	3	3	2
553	60	1	1	0	1	1	2	1	1	2	2	2	1
554	52	1	1	0	1	1	1	3	1	1	3	1	1
555	51	1	1	0	0	2	2	1	2	1	1	1	2
556	60	1	1	1	1	3	3	3	3	3	3	3	3
557	46	1	0	0	0	2	1	0	2	2	0	0	2
558	39	0	0	0	0	0	0	0	0	0	0	0	0
559	51	1	1	1	1	3	2	3	3	2	2	2	3
560	55	1	1	1	1	3	2	1	3	2	0	1	3
561	43	1	0	1	1	3	3	3	3	2	3	2	3
562	45	0	0	0	0	0	1	2	0	0	2	1	1
563	53	1	1	0	1	1	1	0	1	1	1	1	1
564	42	1	0	1	0	3	3	3	3	2	3	2	3
565	58	1	1	0	0	1	1	1	1	1	1	1	1
566	48	1	1	0	0	3	3	2	3	3	2	3	3
567	50	1	1	0	1	2	2	3	2	2	3	2	2
568	58	1	1	0	0	1	0	0	1	3	0	1	1
569	37	1	0	0	1	1	2	1	1	1	2	2	1
570	55	1	1	1	1	2	2	3	2	2	3	2	2
571	59	1	1	1	1	3	3	3	3	3	3	3	3
572	38	0	0	0	0	1	0	0	1	0	0	0	1
573	35	1	0	0	0	0	0	0	0	0	0	0	0
574	51	1	1	1	1	3	3	3	3	3	3	3	3
575	44	1	0	0	0	1	3	3	1	1	3	3	1
576	52	1	1	0	0	0	1	1	0	1	1	1	0
577	47	1	0	0	1	2	2	3	2	2	3	2	2
578	50	1	1	1	1	2	2	3	2	2	2	2	2
579	49	1	1	1	1	3	3	3	3	3	3	3	3
580	46	1	0	1	1	3	3	3	3	3	2	3	3
581	50	1	1	0	1	2	2	2	2	2	3	2	1
582	52	1	1	0	0	0	0	0	0	0	0	0	0
583	45	1	0	0	0	1	2	2	1	2	3	3	1
584	44	1	0	0	0	1	1	1	1	1	1	1	1
585	47	1	0	1	0	2	3	2	2	2	2	3	2
586	46	1	0	0	0	2	1	1	2	1	0	1	2
587	50	1	1	0	1	1	1	1	1	1	1	1	1
588	41	1	0	0	0	2	0	2	2	1	1	0	2
589	40	1	0	0	0	1	1	1	1	0	1	1	1
590	44	1	0	0	0	2	2	2	2	2	2	2	2
591	38	1	0	0	0	0	0	2	0	0	1	0	0
592	35	1	0	0	0	2	2	2	2	2	2	2	2
593	36	1	0	1	1	3	3	3	3	3	3	3	3
594	58	0	1	0	0	0	0	0	0	0	0	0	0
595	54	1	1	1	0	3	3	3	3	3	3	2	3
596	50	1	1	0	0	2	1	1	2	2	1	1	2
597	47	1	0	1	0	3	3	3	3	2	3	3	3
598	39	1	0	0	1	0	0	1	0	0	1	1	0
599	39	1	0	0	0	1	1	2	1	1	2	1	0
600	38	1	0	0	0	1	0	2	1	0	1	0	1
601	52	1	1	0	1	0	0	2	0	0	1	0	0
602	42	1	0	0	0	2	1	2	2	1	2	1	2
603	37	1	0	0	1	0	0	0	0	0	0	0	0
604	39	1	0	0	0	2	2	2	2	2	2	2	2
605	38	1	0	1	1	3	3	3	3	3	3	2	3
606	57	1	1	0	1	1	0	0	1	1	0	0	1
607	39	1	0	0	1	0	0	2	0	0	2	0	0
608	48	1	1	0	1	0	0	1	0	0	0	0	0
609	38	1	0	0	0	3	3	3	3	3	3	3	3
610	49	1	1	1	1	1	2	2	1	1	2	2	1
611	36	1	0	0	0	1	1	3	1	2	3	2	0
612	41	1	0	1	1	3	3	3	3	2	3	3	3
613	35	1	0	0	1	1	2	2	1	1	3	2	1
614	47	1	0	1	1	3	3	3	3	3	3	3	3
615	37	1	0	0	0	1	1	1	1	1	1	1	1
616	36	1	0	0	0	3	3	3	3	3	3	3	3
617	35	1	0	0	1	1	0	1	1	0	0	0	1
618	58	1	1	0	0	0	1	0	0	0	1	1	0
619	46	1	0	0	0	0	0	0	0	0	0	0	0
620	57	1	1	0	0	1	0	0	1	1	0	0	1
621	55	1	1	1	1	2	2	1	2	3	2	3	2
622	44	1	0	0	1	2	3	2	2	3	2	2	2
623	36	1	0	0	1	3	3	1	3	3	2	2	3
624	45	1	0	0	0	3	3	2	3	3	2	2	3
625	47	1	0	1	1	3	3	3	3	3	3	3	3
626	38	1	0	0	0	1	1	1	1	0	1	1	0
627	43	1	0	0	0	0	0	1	0	0	1	0	0
628	37	1	0	1	1	3	3	3	3	3	3	3	3
629	44	1	0	0	0	0	0	0	0	0	0	0	0
630	41	1	0	0	0	0	0	1	0	0	1	1	0
631	46	1	0	0	1	2	2	2	2	3	2	1	2
632	44	1	0	1	0	3	2	2	3	2	2	2	3
633	49	1	1	0	1	1	2	3	1	1	3	2	0
634	39	0	0	1	1	1	3	3	1	3	3	3	1
635	59	1	1	1	1	1	2	2	1	1	1	2	1
636	49	0	1	0	0	0	0	0	0	0	0	0	0
637	52	0	1	0	1	1	2	1	1	1	1	1	2
638	48	0	1	0	0	1	2	2	1	1	2	1	2
639	43	1	0	0	1	0	0	1	0	1	1	1	0
640	49	1	1	0	0	1	0	0	1	1	0	0	1
641	44	1	0	1	1	2	3	2	2	3	2	3	2
642	47	1	0	0	1	0	0	0	0	0	0	0	0
643	50	1	1	0	1	3	3	3	3	3	3	3	3
644	47	1	0	0	1	1	1	2	1	0	2	1	0
645	48	1	1	0	0	0	1	1	0	1	2	1	0
646	54	1	1	1	1	1	1	0	1	3	1	2	1
647	56	1	1	0	1	1	0	0	1	2	0	0	1
648	55	1	1	0	1	3	2	2	3	3	2	2	3
649	54	1	1	0	1	2	1	2	2	1	1	1	2
650	54	1	1	0	0	0	0	1	0	1	1	0	0
651	52	1	1	0	0	1	0	1	1	1	1	0	1
652	51	1	1	0	0	0	0	0	0	0	0	0	0
653	50	1	1	1	1	3	2	3	3	2	3	2	3
654	49	1	1	0	1	1	1	1	1	2	1	2	1
655	46	1	0	1	1	1	2	3	1	2	3	3	2
656	44	1	0	1	0	2	2	3	2	1	2	2	2
657	43	1	0	0	1	1	2	0	1	1	0	2	1
658	47	1	0	0	0	1	0	1	1	1	1	0	1
659	45	1	0	0	0	1	1	0	1	0	0	0	1
660	40	1	0	1	1	2	1	0	2	2	0	1	2
661	47	1	0	0	1	2	1	2	2	2	2	1	2
662	45	1	0	0	1	0	0	2	0	0	2	1	0
663	46	1	0	0	0	0	0	0	0	0	0	0	0
664	45	1	0	1	1	3	3	3	3	3	3	3	3
665	40	1	0	0	0	3	3	2	3	3	1	2	3
666	38	1	0	0	1	1	0	0	1	0	0	0	1
667	37	1	0	0	0	1	1	0	1	1	0	1	1
668	41	1	0	0	1	1	1	2	1	1	2	1	1
669	37	1	0	0	1	2	3	1	2	3	2	2	2
670	49	1	1	0	0	1	2	2	1	1	2	2	1
671	57	1	1	0	1	1	2	3	1	0	3	2	1
672	48	1	1	0	1	0	0	0	0	0	0	0	0
673	52	1	1	0	1	1	1	1	1	0	1	1	1
674	59	1	1	0	1	2	2	1	2	2	1	1	2
675	54	1	1	0	1	0	0	0	0	0	1	1	0
676	53	1	1	1	0	3	2	2	3	2	1	1	3
677	48	1	1	1	1	3	3	3	3	3	2	3	3
678	48	1	1	1	1	3	3	3	3	2	3	3	3
679	53	1	1	0	1	3	3	2	3	3	3	2	2
680	49	1	1	1	1	3	3	2	3	3	1	2	3
681	60	1	1	0	0	0	0	1	0	0	0	0	0
682	53	1	1	1	0	2	3	3	2	2	3	3	2
683	57	1	1	1	1	2	3	3	2	2	3	3	2
684	59	1	1	0	0	0	0	1	0	1	1	1	0
685	52	1	1	1	1	3	3	3	3	3	3	3	3
686	54	1	1	0	0	0	0	1	0	0	0	0	0
687	57	0	1	0	0	1	2	1	1	1	2	2	2
688	60	1	1	0	1	0	0	0	0	0	0	0	0
689	53	1	1	0	0	0	0	1	0	0	0	0	0
690	55	0	1	0	0	0	1	0	0	0	0	1	1
691	58	1	1	0	1	0	1	0	0	1	0	1	0
692	56	0	1	0	0	0	0	0	0	0	0	0	0
693	53	0	1	0	0	1	1	1	1	2	0	0	2
694	58	1	1	0	1	1	0	0	1	0	0	0	0
695	50	1	1	0	0	0	0	0	0	0	0	0	0
696	60	0	1	0	0	0	0	1	0	1	2	0	1
697	45	0	0	0	0	1	1	2	1	1	2	0	1
698	57	0	1	0	1	1	2	1	1	2	2	1	2
699	58	0	1	0	0	0	0	0	0	0	0	0	1
700	44	0	0	0	0	0	0	0	0	0	0	0	1
701	49	1	1	0	1	2	1	2	2	1	1	1	2
702	52	1	1	0	0	1	1	1	1	1	1	2	1
703	43	1	0	0	0	1	2	1	1	2	1	2	1
704	48	1	1	0	1	2	2	3	2	2	3	2	2
705	57	0	1	0	0	1	1	0	1	2	0	0	2
706	56	1	1	0	0	1	0	0	1	1	0	0	1
707	50	0	1	0	0	1	1	0	1	1	0	0	2
708	43	1	0	0	0	2	1	1	2	2	0	1	2
709	48	1	1	0	0	1	0	0	1	1	0	0	1
710	50	1	1	0	0	2	1	3	2	1	2	1	1
711	46	0	0	0	0	0	0	0	0	0	0	0	0
712	57	1	1	0	1	0	1	2	0	1	2	2	0
713	52	0	1	0	0	0	0	0	0	0	0	0	0
714	49	1	1	1	1	2	3	3	2	2	3	3	2
715	49	1	1	0	0	1	1	0	1	1	0	1	1
716	46	0	0	0	1	1	2	1	1	1	1	1	1
717	56	1	1	1	0	3	3	2	3	1	2	2	3
718	55	1	1	0	0	2	1	3	2	2	2	2	2
719	43	1	0	0	0	3	2	1	3	2	2	1	2
720	48	0	1	0	0	0	0	0	0	0	0	0	0
721	53	0	1	0	0	0	0	0	0	0	0	0	0
722	50	1	1	0	0	1	1	0	1	1	0	1	1
723	57	0	1	0	0	1	1	0	1	1	0	0	2
724	57	1	1	0	0	1	0	0	1	1	0	1	1
725	41	1	0	1	1	2	2	3	2	2	3	2	2
726	56	1	1	1	1	2	3	3	2	2	3	3	2
727	35	1	0	1	1	2	2	1	2	2	1	2	2
728	40	0	0	0	0	0	1	0	0	0	0	0	1
729	59	1	1	0	0	3	3	2	3	3	2	3	3
730	35	0	0	0	0	0	0	0	0	1	0	0	0
731	39	1	0	0	0	2	2	2	2	1	1	2	2
732	36	0	0	0	1	2	2	2	2	2	1	1	3
733	58	1	1	0	1	1	0	1	1	1	1	1	0
734	41	1	0	0	0	2	1	1	2	1	1	1	2
735	36	0	0	0	0	0	0	2	0	0	2	0	0
736	39	0	0	1	0	1	3	3	1	1	3	3	2
737	57	1	1	1	1	3	0	3	3	2	3	0	2
738	51	1	1	1	0	3	2	2	3	2	2	2	3
739	42	0	0	0	0	0	0	0	0	0	0	0	1
740	45	0	0	0	0	1	1	2	1	0	1	0	1
741	35	0	0	0	0	0	1	2	0	0	2	1	0
742	54	1	1	0	1	2	1	0	2	1	0	1	2
743	47	0	0	1	1	0	1	2	0	0	2	0	0
744	40	0	0	0	0	0	0	2	0	0	2	0	0
745	37	1	0	0	1	1	1	2	1	1	2	1	1
746	48	1	1	0	1	2	3	2	2	2	2	3	2
747	40	0	0	0	1	1	0	0	1	1	0	0	2
748	53	1	1	0	0	2	2	3	2	2	3	2	2
749	53	1	1	0	0	0	0	1	0	0	0	0	0
750	35	1	0	0	1	0	0	0	0	0	0	0	0
751	44	1	0	0	1	0	0	0	0	0	0	0	0
752	40	1	0	1	1	3	3	3	3	3	3	3	3
753	45	1	0	1	0	1	1	3	1	2	3	2	1
754	39	1	0	1	1	2	2	2	2	2	2	2	2
755	40	1	0	1	1	2	2	2	2	2	2	3	2
756	40	0	0	0	0	0	0	0	0	0	0	0	0
757	35	1	0	0	0	0	0	0	0	0	0	0	0
758	53	1	1	1	1	3	3	3	3	3	3	3	3
759	54	1	1	0	0	2	2	2	2	3	2	3	2
760	48	1	1	0	1	3	3	0	3	3	1	3	3
761	36	0	0	0	0	2	3	2	2	2	2	2	3
762	39	1	0	0	0	3	3	3	3	3	2	3	3
763	37	0	0	1	1	1	3	3	1	3	3	3	2
764	52	1	1	0	0	2	1	0	2	2	0	1	2
765	43	1	0	0	0	1	1	1	1	1	1	1	1
766	37	1	0	0	0	2	2	2	2	2	2	2	2
767	38	1	0	1	0	2	1	2	2	2	2	1	2
768	47	1	0	0	0	1	1	1	1	2	2	1	1
769	48	0	1	0	1	0	0	1	0	0	0	0	0
770	46	0	0	0	0	1	1	0	1	1	0	0	2
771	37	0	0	0	0	0	0	0	0	0	0	0	0
772	53	1	1	0	1	1	1	2	1	0	2	1	0
773	37	1	0	1	0	3	3	3	3	3	3	3	3
774	52	1	1	0	1	2	2	2	2	1	2	2	2
775	37	1	0	0	1	1	1	1	1	1	1	1	1
776	53	1	1	0	0	0	1	0	0	1	1	1	0
777	45	0	0	0	0	0	0	0	0	0	0	0	0
778	35	0	0	0	0	0	0	0	0	0	0	0	1
779	31	1	0	0	1	0	0	1	0	0	1	0	0
780	57	1	1	0	0	0	0	1	0	0	1	1	0
781	54	1	1	0	1	1	0	1	1	0	1	0	0
782	53	1	1	0	1	1	2	1	1	1	2	2	1
783	57	1	1	0	0	1	2	0	1	1	0	2	2
784	50	1	1	0	1	2	2	2	2	2	3	2	2
785	53	1	1	0	1	1	0	1	1	0	1	1	1
786	51	1	1	0	0	0	0	0	0	0	0	1	0
787	52	1	1	0	1	0	1	1	0	1	1	1	0
788	51	1	1	0	1	1	1	2	1	2	2	2	1
789	53	1	1	0	1	2	2	0	2	2	0	2	3
790	55	0	1	1	1	2	3	2	2	2	2	3	2
791	51	0	1	0	1	0	1	0	0	0	0	0	0
792	44	0	0	0	0	0	0	1	0	0	0	0	1
793	49	1	1	0	1	0	1	1	0	0	2	2	0
794	44	0	0	0	0	1	2	2	1	1	2	1	2
795	56	1	1	1	1	0	1	2	0	1	2	2	0
796	50	1	1	0	0	0	0	0	0	1	1	0	0
797	58	1	1	1	1	2	2	2	2	2	3	2	2
798	54	1	1	0	0	0	0	0	0	0	0	0	0
799	46	1	0	0	0	1	0	0	1	1	0	0	1
800	53	1	1	0	1	1	1	0	0	1	1	1	0
801	50	1	1	0	1	0	1	1	0	0	1	1	0
802	54	0	1	1	0	1	2	2	1	2	2	2	2
803	46	0	0	0	0	0	0	1	0	0	0	0	0
804	52	1	1	0	1	3	3	2	3	3	2	2	3
805	47	0	0	0	0	0	0	0	0	0	0	0	0
806	46	1	0	0	0	2	1	1	2	2	1	1	2
807	37	1	0	0	0	0	0	1	0	0	1	0	0
808	49	1	1	0	1	0	0	0	0	0	0	0	0
809	52	1	1	0	0	1	2	2	1	2	3	2	1
810	39	0	0	0	0	0	0	0	0	0	0	0	0
811	48	0	1	0	0	1	0	1	1	1	1	0	2
812	46	0	0	0	0	0	0	0	0	0	0	0	1
813	52	1	1	1	1	3	3	3	3	3	3	3	3
814	47	0	0	0	0	0	0	0	0	0	0	0	0
815	38	0	0	0	1	0	0	0	0	1	0	0	1
816	39	1	0	0	1	0	0	0	0	0	0	0	0
817	49	0	1	0	0	1	2	1	1	1	2	1	1
818	52	0	1	0	0	2	2	0	2	2	1	1	2
819	45	0	0	1	0	2	2	2	2	1	2	1	3
820	52	1	1	0	0	1	2	1	1	3	2	2	1
821	51	1	1	0	1	2	1	1	2	2	1	0	2
822	52	0	1	0	0	0	0	0	0	0	0	0	0
823	44	1	0	1	1	3	3	3	3	3	3	3	3
824	50	1	1	1	1	3	3	3	3	3	3	3	3
825	45	1	0	0	1	2	3	2	2	1	2	3	2
826	39	0	0	0	0	0	0	0	0	0	0	0	0
827	59	1	1	1	0	0	0	0	0	0	0	1	0
828	60	1	1	0	0	0	0	1	0	0	1	0	0
829	58	1	1	1	1	2	2	3	2	2	3	3	1
830	60	1	1	0	1	0	0	0	0	0	0	0	0
831	57	1	1	0	1	2	1	1	2	1	0	1	2
832	56	1	1	0	1	1	2	1	1	2	2	2	1
833	58	1	1	0	1	0	0	1	0	0	1	0	0
834	56	1	1	0	0	1	1	1	1	1	0	1	1
835	57	1	1	0	1	1	1	2	1	1	1	2	1
836	56	1	1	0	0	1	1	1	1	1	1	1	1
837	56	1	1	0	0	1	2	1	1	2	2	2	1
838	56	1	1	0	1	3	2	1	3	3	1	1	3
839	58	1	1	0	0	2	3	2	2	3	2	3	3
840	59	1	1	0	0	0	0	0	0	0	0	0	0
841	55	1	1	0	0	0	0	0	0	0	0	0	0
842	53	1	1	1	0	2	3	3	2	3	3	3	2
843	53	1	1	0	0	3	3	2	3	3	2	2	3
844	53	1	1	1	1	3	3	3	3	2	3	3	3
845	54	1	1	0	1	2	2	1	2	2	1	2	2
846	52	1	1	1	0	2	1	1	2	3	1	1	2
847	45	0	0	0	0	0	0	0	0	0	0	0	0
848	49	1	1	0	1	0	0	2	0	0	1	0	0
849	39	0	0	0	0	0	0	0	0	0	0	0	0
850	50	1	1	0	1	0	2	2	0	0	2	3	1
851	51	1	1	1	1	2	3	3	2	2	3	3	2
852	52	1	1	0	0	1	2	2	1	3	2	3	1
853	54	1	1	1	1	2	3	1	2	2	2	3	2
854	52	1	1	1	1	3	3	3	3	3	3	3	3
855	41	1	0	1	0	2	1	2	2	1	1	1	2
856	39	0	0	0	0	1	0	1	1	0	0	0	1
857	37	1	0	0	0	1	0	0	1	1	0	0	0
858	52	1	1	0	0	3	3	2	3	3	2	3	3
859	54	1	1	1	1	3	3	3	3	3	3	2	3
860	46	1	0	0	0	2	2	1	2	1	0	1	2
861	36	1	0	0	0	1	0	0	1	1	0	1	1
862	39	0	0	0	0	1	1	1	1	1	1	0	1
863	48	1	1	0	1	0	0	0	0	0	0	0	0
864	46	1	0	0	0	0	0	0	0	0	0	0	0
865	45	0	0	0	0	0	0	0	0	0	0	0	0
866	52	1	1	0	1	0	1	1	0	1	1	2	0
867	51	1	1	1	0	3	3	3	3	3	2	3	3
868	53	1	1	0	1	3	3	1	3	3	2	2	3
869	51	1	1	0	1	0	0	1	0	0	1	1	0
870	50	1	1	0	0	0	0	0	0	0	0	0	0
871	50	1	1	1	1	2	3	3	2	2	3	3	3
872	51	1	1	0	0	1	2	2	1	1	2	3	1
873	51	1	1	0	0	1	3	1	1	2	2	3	1
874	47	1	0	0	1	0	1	1	0	1	1	1	0
875	52	1	1	0	0	0	0	2	0	0	1	1	0
876	53	1	1	0	0	1	1	2	1	1	1	1	1
877	47	0	0	0	0	0	1	2	0	0	2	0	0
878	51	1	1	0	1	0	0	0	0	0	0	0	0
879	51	1	1	1	0	2	2	3	2	3	3	3	2
880	50	1	1	0	0	2	3	3	2	1	3	3	2
881	46	1	0	0	0	0	0	0	0	0	1	1	0
882	53	1	1	0	1	0	0	2	0	1	2	1	0
883	37	1	0	0	1	1	1	1	1	2	1	1	1
884	50	1	1	0	0	1	2	2	1	2	3	2	1
885	44	0	0	0	1	0	0	1	0	0	1	0	1
886	46	1	0	1	1	2	3	3	2	2	3	3	2
887	51	1	1	0	1	0	0	0	0	0	0	1	0
888	50	1	1	0	1	1	0	0	0	1	0	0	0
889	50	1	1	0	1	2	2	2	2	3	3	2	2
890	50	1	1	0	1	0	1	1	0	0	1	1	0
891	52	1	1	0	1	1	2	2	1	1	3	2	1
892	49	1	1	0	0	3	3	2	3	3	3	3	3
893	50	1	1	0	1	1	2	1	1	2	1	2	2
894	51	1	1	1	1	3	2	2	3	3	2	2	3
895	49	1	1	0	1	0	0	0	0	0	0	0	0
896	53	1	1	0	0	1	1	2	1	0	2	1	0
897	46	1	0	0	0	2	2	1	2	2	1	2	2
898	58	1	1	1	1	2	3	3	2	2	3	3	2
899	48	1	1	0	1	2	1	1	2	2	1	0	1
900	47	1	0	1	0	3	3	3	3	3	3	3	3
901	49	1	1	0	0	2	2	2	2	2	2	2	2
902	53	1	1	0	1	0	0	0	0	0	0	0	0
903	53	1	1	0	0	2	2	3	2	3	3	3	2
904	52	1	1	0	0	2	2	2	2	2	2	2	2
905	47	1	0	1	1	1	0	1	1	0	0	1	1
906	46	1	0	0	0	1	1	2	1	0	2	1	1
907	47	1	0	0	0	0	0	1	0	1	1	0	0
908	53	1	1	0	1	1	1	0	1	1	0	1	1
909	47	1	0	0	1	3	3	2	3	3	2	2	3
910	50	1	1	1	1	2	2	2	2	2	2	3	2
911	48	1	1	1	0	3	3	2	3	3	2	3	3
912	56	1	1	0	1	1	1	1	1	0	1	2	1
913	49	1	1	1	1	2	3	3	2	2	3	3	2
914	47	1	0	0	1	1	0	1	1	1	1	0	1
915	41	1	0	0	0	0	0	0	0	0	0	0	0
916	49	1	1	0	0	1	1	0	1	1	1	1	1
917	52	1	1	0	0	1	1	1	1	1	1	1	1
918	53	1	1	0	0	2	2	2	2	2	1	2	2
919	50	1	1	0	0	0	0	1	0	0	1	0	0
920	55	1	1	0	0	1	2	1	1	0	1	2	1
921	48	0	1	0	0	0	2	3	0	2	3	3	1
922	50	0	1	0	0	0	0	0	0	0	0	0	0
923	47	0	0	1	0	2	2	1	2	1	0	1	3
924	52	1	1	0	0	3	3	3	3	3	3	3	3
925	38	1	0	1	1	3	3	3	3	3	3	2	3
926	57	1	1	1	0	1	3	3	1	1	3	3	1
927	55	1	1	1	1	2	1	3	2	1	3	2	2
928	51	1	1	0	0	0	1	2	0	1	3	2	0
929	54	1	1	0	0	1	1	1	1	1	1	1	1
930	52	1	1	0	0	0	0	0	0	1	0	1	0
931	49	1	1	0	0	0	0	0	0	1	0	1	0
932	53	1	1	1	0	1	3	3	1	3	3	3	1
933	38	0	0	0	0	0	0	0	0	0	0	0	0
934	45	1	0	1	1	2	3	3	2	2	3	3	3
935	43	1	0	1	1	3	3	2	3	3	2	3	3
936	38	1	0	0	1	0	1	2	0	1	3	2	0
937	39	0	0	0	1	0	0	0	0	1	0	0	1
938	46	1	0	0	0	3	3	1	3	3	2	2	3
939	36	0	0	0	1	0	0	0	0	0	0	0	0
940	37	1	0	0	0	1	1	2	1	1	2	2	1
941	59	0	1	0	0	0	0	0	0	0	0	0	1
942	54	1	1	1	1	3	2	2	3	2	2	2	3
943	45	0	0	0	0	0	0	0	0	1	0	0	1
944	48	0	1	0	1	0	0	0	0	0	0	0	0
945	49	1	1	0	1	3	3	2	3	3	2	2	3
946	35	1	0	0	0	1	0	1	1	0	0	0	1
947	50	1	1	0	0	1	1	1	1	1	1	1	1
948	48	0	1	0	0	0	0	0	0	0	0	0	0
949	35	0	0	0	0	0	0	0	0	0	0	0	1
950	35	1	0	0	0	3	2	3	3	2	2	2	3
951	62	1	1	0	1	1	0	1	0	1	1	1	0
952	59	1	1	0	0	0	1	0	0	0	1	1	0
953	60	1	1	0	0	2	2	0	2	2	0	2	2
954	40	0	0	0	0	1	1	0	1	1	1	0	2
955	57	1	1	1	0	1	2	2	1	2	1	3	1
956	42	1	0	0	1	2	2	2	2	2	3	1	1
957	52	1	1	0	0	2	2	3	2	1	3	2	2
958	40	1	0	1	1	3	3	3	3	3	3	3	3
959	48	1	1	0	0	0	1	1	0	2	1	2	0
960	51	1	1	0	1	3	2	1	3	3	1	2	3
961	51	1	1	0	1	1	0	0	1	1	0	0	1
962	49	1	1	0	0	2	2	1	2	2	1	2	2
963	45	1	0	0	1	2	1	0	2	2	1	1	2
964	59	1	1	0	1	1	2	2	1	3	3	3	1
965	54	1	1	0	0	0	0	0	0	0	0	0	0
966	54	1	1	0	1	1	1	0	1	2	0	0	1
967	50	1	1	0	0	1	1	2	1	1	2	2	1
968	44	1	0	0	0	1	0	2	1	1	2	0	1
969	52	1	1	1	1	3	3	3	3	3	3	3	3
970	38	1	0	0	1	3	3	3	3	3	3	3	3
971	46	1	0	1	1	2	3	3	2	3	3	3	2
972	50	1	1	1	1	3	3	3	3	3	2	3	3
973	48	1	1	0	1	0	0	0	0	0	0	0	0
974	49	1	1	0	1	0	0	1	0	1	1	1	0
975	60	1	1	0	1	1	1	1	1	1	1	2	1
976	60	1	1	0	0	0	1	1	0	0	2	2	0
977	58	1	1	1	1	3	3	3	3	3	3	3	3
978	58	1	1	0	0	2	0	0	2	2	0	0	2
979	56	1	1	0	1	2	2	1	2	2	1	2	2
980	57	1	1	0	0	1	1	1	1	1	1	1	1
981	56	1	1	1	1	3	3	3	3	3	3	3	3
982	51	1	1	0	1	1	0	0	1	1	0	0	0
983	49	1	1	0	0	1	0	0	1	1	0	0	1
984	48	1	1	0	1	1	1	1	1	1	1	1	1
985	47	1	0	1	1	3	2	1	3	2	1	2	3
986	52	1	1	0	1	3	3	3	3	3	3	3	3
987	43	1	0	0	0	2	2	3	2	2	3	1	2
988	57	1	1	0	1	0	0	0	0	0	0	0	0
989	52	1	1	0	0	0	0	0	0	0	0	0	0
990	45	1	0	0	0	3	3	2	3	3	2	3	3
991	47	1	0	1	1	3	3	2	3	3	2	3	3
992	49	1	1	0	1	0	0	1	0	1	2	0	0
993	53	1	1	0	1	0	0	0	0	0	0	0	0
994	58	1	1	0	1	1	2	1	1	1	1	2	2
995	52	1	1	0	0	1	1	1	1	1	1	1	1
996	46	1	0	0	1	2	2	0	2	2	1	1	2
997	49	1	1	0	1	3	3	3	3	3	3	3	3
998	42	1	0	1	1	2	3	2	2	2	3	3	2
999	50	1	1	0	1	3	3	2	3	3	3	3	3
1000	44	1	0	0	1	0	0	0	0	1	0	0	0
1001	47	1	0	0	1	1	1	1	1	2	1	1	1
1002	48	1	1	0	0	0	0	0	0	0	1	0	0
1003	54	1	1	0	1	1	0	2	1	2	2	1	1
1004	48	0	1	0	1	1	2	0	1	1	0	1	2
1005	36	1	0	0	1	2	2	2	2	1	2	2	2
1006	50	1	1	0	0	1	1	1	1	2	1	1	1
1007	56	1	1	0	0	2	1	3	2	2	2	1	2
1008	52	1	1	0	0	1	0	0	1	1	0	0	1
1009	47	1	0	0	1	1	0	1	1	1	1	1	1
1010	40	1	0	1	1	1	3	3	1	2	3	3	1
1011	51	1	1	0	0	0	0	0	0	1	0	0	0
1012	46	1	0	1	1	3	3	3	3	3	3	3	3
1013	45	1	0	0	1	2	3	2	2	2	2	3	2
1014	52	1	1	0	0	0	1	1	0	0	1	1	0
1015	47	1	0	0	0	1	1	1	1	1	1	1	1
1016	46	1	0	1	1	3	3	2	3	3	2	3	3
1017	59	1	1	0	0	2	1	1	2	2	1	1	2
1018	53	1	1	1	1	3	3	3	3	3	3	3	3
1019	54	0	1	1	1	2	3	3	2	3	3	3	3
1020	54	0	1	0	1	1	1	0	1	2	0	0	2
1021	53	0	1	0	0	0	0	0	0	0	0	0	0
1022	45	0	0	0	1	0	0	0	0	0	0	0	1
1023	47	0	0	0	0	0	0	3	0	0	3	0	0
1024	49	0	1	0	0	2	2	2	2	2	3	1	2
1025	44	0	0	1	1	0	2	3	0	1	3	3	1
1026	53	1	1	0	0	0	0	0	0	0	0	0	0
1027	46	0	0	1	1	1	3	3	1	2	3	3	2
1028	36	1	0	0	0	3	2	2	3	2	2	2	3
1029	42	0	0	0	0	0	1	0	0	0	0	0	1
1030	39	0	0	0	1	0	0	0	0	0	0	0	0
1031	40	1	0	0	0	1	1	1	1	1	1	1	1
1032	54	1	1	0	0	2	2	2	2	3	3	3	1
1033	53	0	1	0	0	0	0	0	0	0	0	0	0
1034	55	1	1	1	1	1	2	1	1	1	1	3	2
1035	51	1	1	1	1	3	3	3	3	3	3	3	3
1036	56	1	1	0	0	0	0	0	0	1	0	0	0
1037	51	1	1	0	1	2	2	3	2	2	2	2	2
1038	48	1	1	0	0	3	3	3	3	3	3	3	3
1039	39	0	0	0	0	0	0	0	0	0	0	0	0
1040	52	0	1	0	0	0	1	0	0	0	1	1	0
1041	57	0	1	1	1	2	2	3	2	2	3	1	2
1042	41	0	0	0	0	0	0	0	0	0	0	0	0
1043	46	0	0	0	0	1	2	0	1	1	0	1	2
1044	45	0	0	0	0	0	0	0	0	0	0	0	0
1045	45	0	0	0	0	0	0	0	0	0	0	0	0
1046	51	1	1	0	1	0	0	1	0	0	1	1	0
1047	45	0	0	0	0	1	1	0	1	1	0	0	2
1048	52	1	1	0	0	1	1	2	1	0	1	2	1
1049	55	1	1	1	1	2	2	3	2	3	3	2	2
1050	61	1	1	1	1	3	2	2	3	3	2	2	3
1051	56	1	1	0	1	2	2	2	2	2	1	2	2
1052	35	1	0	0	0	0	0	0	0	0	0	0	0
1053	60	1	1	1	1	2	1	2	2	3	3	2	2
1054	35	0	0	0	0	1	1	2	1	0	2	1	2
1055	47	0	0	0	0	1	3	3	1	3	3	3	2
1056	41	0	0	0	0	0	0	2	0	0	2	0	0
1057	54	1	1	1	0	3	3	1	3	3	2	3	3
1058	52	1	1	0	0	0	0	0	0	0	0	0	0
1059	51	1	1	1	0	2	2	1	2	2	1	2	2
1060	60	1	1	0	1	0	0	0	0	0	1	1	0
1061	47	1	0	0	1	1	1	0	0	1	1	1	0
1062	43	1	0	1	0	3	3	3	3	3	3	3	3
1063	56	1	1	1	1	2	0	1	2	3	1	1	2
1064	48	1	1	1	0	2	2	1	2	3	2	2	2
1065	51	1	1	0	1	2	1	1	2	2	0	1	2
1066	46	1	0	0	0	1	1	1	1	1	1	1	1
1067	45	1	0	1	1	1	3	2	1	2	3	3	1
1068	50	1	1	0	1	0	0	1	0	0	1	0	0
1069	49	1	1	0	1	3	3	2	3	3	3	3	3
1070	46	1	0	1	0	3	3	3	3	3	3	3	3
1071	41	1	0	0	0	2	3	3	2	2	3	3	2
1072	52	1	1	0	0	2	3	2	2	3	2	3	2
1073	46	1	0	0	1	0	0	0	0	0	0	0	0
1074	50	1	1	0	0	0	0	0	0	0	0	0	0
1075	60	1	1	0	0	2	2	2	2	2	1	2	2
1076	60	1	1	0	1	0	0	0	0	1	0	0	0
1077	60	1	1	0	0	1	1	0	1	1	1	1	1
1078	60	1	1	0	0	0	2	1	0	0	1	3	0
1079	59	1	1	0	0	1	1	0	1	2	0	0	1
1080	59	1	1	0	1	1	0	3	1	1	2	0	1
1081	59	1	1	0	0	2	1	1	2	1	1	1	2
1082	58	1	1	0	0	1	0	0	1	1	0	0	1
1083	58	1	1	0	0	2	2	3	2	2	3	2	2
1084	58	1	1	1	0	2	2	3	2	3	3	3	2
1085	57	1	1	0	0	1	3	3	1	1	3	3	1
1086	57	1	1	1	1	3	3	2	3	3	2	3	3
1087	55	1	1	0	0	2	2	2	2	2	2	2	2
1088	55	1	1	1	1	3	3	3	3	3	3	3	3
1089	56	1	1	1	0	3	3	3	3	3	3	3	3
1090	55	1	1	0	0	1	1	1	1	1	1	1	1
1091	56	1	1	0	0	3	3	3	3	3	3	3	3
1092	56	1	1	1	1	3	3	2	3	3	2	3	3
1093	54	1	1	0	1	1	2	1	1	1	2	2	1
1094	53	1	1	0	1	3	3	1	3	3	2	2	3
1095	51	1	1	0	1	1	1	2	1	1	2	2	1
1096	52	1	1	0	0	1	1	1	1	1	1	2	1
1097	50	1	1	0	1	2	2	2	2	2	3	2	2
1098	52	1	1	0	0	1	2	2	1	0	2	2	1
1099	54	1	1	0	0	0	1	2	0	1	3	1	0
1100	49	1	1	0	0	1	2	3	1	1	3	2	1
1101	51	1	1	0	0	1	2	2	1	1	2	2	1
1102	53	1	1	1	1	3	3	2	3	3	2	3	3
1103	52	1	1	0	0	3	3	1	3	3	1	2	3
1104	49	1	1	0	0	0	0	1	0	0	0	0	0
1105	53	1	1	1	1	3	3	2	3	3	2	3	3
1106	47	1	0	1	1	2	2	3	2	3	3	3	2
1107	53	1	1	0	1	2	2	1	2	2	1	2	2
1108	53	1	1	0	1	2	2	2	2	2	2	2	2
1109	50	1	1	1	1	2	3	2	2	2	3	3	2
1110	50	1	1	0	1	2	3	3	2	2	3	3	2
1111	52	1	1	0	0	0	0	0	0	0	0	0	0
1112	52	1	1	0	0	2	2	1	2	2	1	2	2
1113	49	1	1	1	0	3	3	3	3	3	3	3	3
1114	53	1	1	0	0	1	1	0	1	2	1	1	1
1115	48	1	1	0	1	0	1	1	0	2	1	2	0
1116	50	1	1	0	1	1	2	3	1	1	3	3	1
1117	47	1	0	1	0	3	3	3	3	3	3	3	3
1118	51	1	1	0	0	1	2	3	1	2	3	2	1
1119	46	1	0	1	1	2	2	1	2	3	1	2	2
1120	52	1	1	0	1	1	1	3	1	2	3	2	1
1121	47	1	0	0	1	2	1	2	2	2	2	1	2
1122	48	1	1	0	1	0	0	0	0	0	0	0	0
1123	45	1	0	1	1	1	1	1	1	2	2	1	1
1124	48	1	1	1	1	3	3	2	3	3	3	3	3
1125	48	1	1	0	0	2	1	2	2	1	1	1	2
1126	46	1	0	0	1	0	0	1	0	0	1	0	0
1127	48	1	1	0	1	2	2	3	2	1	2	3	2
1128	45	1	0	0	1	0	0	0	0	1	0	0	0
1129	48	1	1	0	0	2	1	3	2	2	3	2	2
1130	38	1	0	0	0	0	0	0	0	0	0	0	0
1131	38	1	0	1	1	3	3	3	3	3	3	3	3
1132	36	1	0	0	0	2	1	0	2	2	0	1	2
1133	37	1	0	0	0	1	1	0	1	1	0	1	1
1134	52	1	1	0	1	1	1	1	1	2	1	2	1
1135	49	1	1	0	1	0	0	2	0	0	2	1	0
1136	59	1	1	0	1	1	1	2	1	1	3	2	1
1137	52	1	1	0	1	1	0	1	1	2	1	1	1
1138	50	1	1	0	0	0	0	0	0	1	0	0	0
1139	49	1	1	1	1	3	2	2	3	3	1	1	3
1140	51	1	1	0	1	3	3	1	3	3	1	3	3
1141	47	1	0	0	0	2	2	2	2	2	2	2	2
1142	49	1	1	0	0	1	2	2	1	1	2	2	1
1143	43	1	0	0	0	2	2	2	2	2	2	1	2
1144	41	1	0	0	1	1	1	0	1	1	1	1	1
1145	40	1	0	1	1	2	2	2	2	3	3	2	2
1146	37	1	0	0	1	1	1	2	1	2	3	1	1
1147	40	1	0	0	0	0	0	0	0	0	0	0	0
1148	39	1	0	0	1	1	1	1	1	1	1	1	1
1149	59	1	1	0	0	0	0	0	0	0	0	0	0
1150	48	1	1	0	0	3	3	2	3	3	2	2	3
1151	60	1	1	0	1	2	2	1	2	2	2	2	1
1152	59	1	1	0	0	1	1	0	1	1	1	1	1
1153	57	1	1	0	1	0	2	2	0	1	2	2	0
1154	55	1	1	0	1	1	2	1	1	1	1	1	1
1155	53	1	1	0	0	0	1	1	0	0	1	1	0
1156	52	1	1	1	1	3	3	2	3	3	3	3	3
1157	53	1	1	1	0	3	3	2	3	3	3	2	3
1158	51	1	1	1	1	1	2	1	1	2	1	3	1
1159	52	1	1	0	1	1	1	3	1	1	3	2	0
1160	51	1	1	0	1	1	2	1	1	1	1	2	1
1161	49	1	1	1	1	3	3	3	3	3	3	3	3
1162	50	1	1	0	1	1	0	1	1	1	1	0	1
1163	51	1	1	0	1	1	2	2	1	2	3	2	1
1164	50	1	1	0	1	1	1	2	1	0	2	2	1
1165	48	1	1	0	0	2	2	3	2	2	2	2	2
1166	48	1	1	0	0	2	3	3	2	2	3	2	2
1167	48	1	1	1	1	2	2	0	2	2	0	2	2
1168	47	1	0	0	0	2	2	2	2	2	3	2	2
1169	47	1	0	0	0	1	0	1	1	1	1	0	1
1170	46	1	0	0	0	3	2	1	3	3	1	1	3
1171	44	1	0	0	0	3	2	2	3	3	2	2	3
1172	46	1	0	0	1	2	2	2	2	2	2	1	2
1173	48	1	1	1	1	3	3	3	3	3	3	3	3
1174	46	1	0	1	1	3	3	2	3	3	2	2	3
1175	40	1	0	0	0	1	1	0	1	0	0	0	1
1176	37	1	0	0	0	0	1	1	0	1	1	1	0
1177	53	1	1	0	1	2	1	1	2	2	1	1	2
1178	58	1	1	1	1	0	2	3	0	1	3	3	0
1179	56	1	1	0	0	1	2	1	1	1	2	2	1
1180	54	1	1	1	1	2	3	3	2	2	3	3	3
1181	60	1	1	0	1	1	0	0	1	2	0	1	1
1182	47	1	0	0	1	0	0	2	0	0	2	0	0
1183	55	1	1	0	0	0	0	0	0	0	0	1	0
1184	44	1	0	1	1	2	2	2	2	2	2	2	2
1185	55	1	1	1	1	0	1	2	0	1	2	2	0
1186	50	1	1	0	0	2	2	2	2	2	2	2	2
1187	53	1	1	0	1	2	2	2	2	2	2	2	2
1188	54	1	1	0	0	0	0	0	0	0	0	0	0
1189	54	1	1	0	1	0	0	0	0	0	0	0	0
1190	53	1	1	0	1	0	0	0	0	0	0	1	0
1191	52	1	1	0	1	1	2	0	1	2	1	2	1
1192	51	1	1	0	0	1	0	0	1	1	0	0	0
1193	49	1	1	0	1	2	2	1	2	1	1	1	2
1194	51	1	1	1	1	3	3	2	3	3	2	2	3
1195	51	1	1	0	1	0	0	0	0	0	0	0	0
1196	53	1	1	0	0	1	0	1	1	0	1	0	0
1197	52	1	1	0	1	1	1	1	1	1	1	2	1
1198	49	1	1	0	1	1	1	1	1	1	1	1	1
1199	49	1	1	0	0	0	0	0	0	0	0	0	0
1200	46	1	0	0	0	0	0	1	0	0	1	0	0
1201	50	1	1	0	0	2	1	2	2	1	1	2	2
1202	54	1	1	0	0	1	0	0	1	1	0	0	1
1203	53	1	1	1	0	2	3	1	2	3	2	2	2
1204	53	1	1	1	1	0	1	3	0	0	3	2	0
1205	49	1	1	0	0	0	0	0	0	0	0	0	0
1206	45	1	0	1	1	1	3	2	1	2	3	3	1
1207	46	1	0	0	0	0	0	0	0	0	0	0	0
1208	40	1	0	0	0	3	3	2	3	3	2	2	3
1209	41	1	0	0	1	1	2	2	1	1	2	2	1
1210	36	1	0	0	0	3	2	2	3	3	2	2	3
1211	41	1	0	0	0	0	0	0	0	0	0	0	0
1212	35	1	0	0	0	3	3	3	3	2	3	3	3
1213	55	1	1	0	1	2	2	2	2	2	2	2	2
1214	56	1	1	0	0	2	1	2	2	1	1	0	2
1215	52	1	1	0	1	1	2	3	1	2	3	2	1
1216	53	1	1	0	0	0	0	0	0	0	0	0	0
1217	59	1	1	1	1	3	3	3	3	3	3	3	3
1218	40	1	0	0	1	2	2	1	2	2	1	1	2
1219	44	1	0	0	0	1	2	2	1	1	2	2	1
1220	54	1	1	0	1	2	2	1	2	1	2	1	1
1221	50	1	1	0	1	0	0	1	0	1	1	0	0
1222	46	1	0	0	1	1	0	1	1	0	1	0	1
1223	52	1	1	0	0	0	0	0	0	0	1	0	0
1224	59	1	1	0	0	3	3	3	3	3	3	3	3
1225	57	1	1	0	0	0	0	0	0	0	0	0	0
1226	58	1	1	0	1	0	0	0	0	0	0	0	0
1227	55	1	1	1	1	2	2	2	2	3	2	3	2
1228	48	1	1	0	1	2	2	2	2	2	3	2	1
1229	51	1	1	0	0	2	2	2	2	1	1	1	2
1230	51	1	1	0	0	2	1	0	2	1	0	0	2
1231	53	1	1	1	1	1	0	0	1	1	0	1	1
1232	52	1	1	0	0	1	1	0	1	0	0	0	1
1233	53	1	1	1	1	2	3	3	2	2	3	3	2
1234	49	1	1	1	0	3	3	3	3	3	2	3	3
1235	49	1	1	0	0	2	1	2	2	1	1	1	2
1236	51	1	1	0	0	1	2	1	1	1	1	1	1
1237	50	1	1	1	0	3	3	3	3	2	2	2	3
1238	54	1	1	0	0	0	0	0	0	0	0	0	0
1239	48	1	1	0	1	1	1	1	1	1	1	1	1
1240	47	1	0	0	0	1	2	2	1	1	3	1	1
1241	47	1	0	0	1	2	3	2	2	2	3	2	2
1242	46	1	0	1	1	3	3	3	3	3	3	3	3
1243	42	1	0	1	0	3	2	2	3	3	2	1	3
1244	45	1	0	1	1	3	3	3	3	3	3	3	3
1245	55	1	1	1	1	3	3	3	3	3	3	3	3
1246	54	1	1	0	1	2	2	2	2	2	1	1	2
1247	57	1	1	0	1	2	2	2	2	2	3	2	2
1248	54	1	1	1	1	3	3	3	3	2	3	3	3
1249	43	1	0	0	1	1	0	1	0	0	1	0	0
1250	51	1	1	0	0	2	1	2	2	1	1	1	2
1251	43	1	0	0	1	2	3	2	2	3	3	3	2
1252	51	1	1	1	1	2	2	1	2	2	2	1	2
1253	53	1	1	0	1	1	0	2	1	1	2	0	1
1254	50	1	1	1	1	3	3	3	3	3	3	3	3
1255	49	1	1	0	1	1	0	1	1	0	1	0	0
1256	53	1	1	0	0	0	0	0	0	0	0	0	0
1257	59	1	1	0	1	0	0	0	0	0	1	0	0
1258	58	1	1	0	1	0	1	0	0	0	1	0	0
1259	57	1	1	0	1	3	2	0	3	3	1	1	3
1260	57	1	1	1	0	3	3	2	3	3	2	3	3
1261	57	1	1	0	1	3	2	3	3	2	3	2	2
1262	55	1	1	1	1	3	3	3	3	3	3	3	3
1263	55	1	1	0	1	0	0	0	0	0	0	0	0
1264	54	1	1	0	1	1	2	1	1	2	2	2	1
1265	54	1	1	0	0	0	0	0	0	0	0	0	0
1266	54	1	1	0	0	1	1	0	1	1	0	1	1
1267	54	1	1	1	1	2	2	2	2	0	2	2	2
1268	54	1	1	1	1	3	3	3	3	3	3	3	3
1269	51	1	1	0	0	0	1	1	0	0	1	1	0
1270	53	1	1	1	1	2	3	3	2	2	3	3	2
1271	51	1	1	1	1	3	3	3	3	3	3	3	3
1272	50	1	1	0	0	2	1	0	2	1	0	1	2
1273	51	1	1	0	1	2	2	1	2	2	1	1	2
1274	53	1	1	1	1	3	3	3	3	3	3	3	3
1275	51	1	1	1	1	2	3	3	2	2	3	3	2
1276	53	1	1	1	1	1	2	2	1	3	2	3	1
1277	50	1	1	0	1	2	2	3	2	1	3	2	2
1278	53	1	1	0	1	0	0	0	0	0	0	0	0
1279	50	1	1	0	1	3	3	3	3	2	3	2	3
1280	47	1	0	0	0	0	0	0	0	0	0	0	0
1281	48	1	1	0	0	2	2	1	2	2	1	2	2
1282	46	1	0	0	1	3	2	1	3	2	1	1	3
1283	47	1	0	1	0	3	2	2	3	3	2	1	3
1284	46	1	0	0	1	1	1	0	1	2	0	0	1
1285	46	1	0	0	0	3	2	2	3	2	1	2	3
1286	44	1	0	0	1	0	0	0	0	0	0	0	0
1287	44	1	0	0	1	1	2	1	1	1	1	1	1
1288	46	1	0	1	1	3	3	1	3	3	1	2	3
1289	48	1	1	0	1	0	1	1	0	1	2	1	0
1290	48	1	1	0	1	1	2	2	1	2	2	2	1
1291	48	1	1	0	1	2	2	2	2	2	2	2	2
1292	47	1	0	0	0	1	0	1	1	0	1	0	1
1293	52	1	1	0	0	0	1	0	0	0	1	1	0
1294	50	1	1	1	1	3	3	2	3	3	3	3	3
1295	53	1	1	1	1	2	2	3	2	2	3	3	1
1296	51	1	1	0	0	0	0	0	0	0	0	0	0
1297	51	0	1	0	0	0	0	0	0	0	0	0	0
1298	45	1	0	0	1	1	1	1	1	0	1	1	1
1299	50	1	1	0	1	1	1	1	1	1	1	0	1
1300	50	1	1	0	0	0	0	1	0	0	0	0	0
1301	51	1	1	1	0	2	3	2	2	1	2	2	2
1302	57	1	1	0	1	0	0	0	0	0	0	0	0
1303	55	1	1	0	0	1	0	1	1	0	1	0	1
1304	59	1	1	0	1	3	3	0	3	3	0	2	3
1305	58	1	1	0	0	0	0	2	0	0	2	0	0
1306	56	1	1	0	0	1	1	0	1	1	0	0	1
1307	55	1	1	0	0	2	2	1	2	2	1	2	2
1308	54	1	1	1	0	3	3	3	3	3	3	3	3
1309	51	1	1	0	1	3	0	1	3	3	0	0	3
1310	51	1	1	1	0	3	3	3	3	3	3	3	3
1311	49	1	1	0	0	0	0	0	0	0	0	0	0
1312	42	1	0	0	0	1	0	0	1	2	0	0	0
1313	50	1	1	0	1	2	2	1	2	1	0	1	2
1314	52	1	1	0	0	1	1	0	1	1	0	1	1
1315	46	1	0	0	1	1	0	2	1	1	2	1	1
1316	46	1	0	0	1	3	2	3	3	2	3	2	2
1317	46	1	0	0	0	0	0	0	0	0	0	0	0
1318	48	1	1	1	0	3	3	3	3	3	3	3	3
1319	43	1	0	0	0	0	0	0	0	1	0	0	0
1320	42	1	0	0	1	1	0	2	1	0	1	0	1
1321	43	1	0	0	0	2	2	2	2	1	2	1	2
1322	37	1	0	0	1	1	2	3	1	1	3	2	1
1323	41	0	0	0	0	1	0	0	1	2	0	0	2
1324	47	1	0	0	1	0	0	0	0	0	0	0	0
1325	58	1	1	1	0	3	3	3	3	2	3	3	3
1326	60	1	1	0	1	1	2	0	1	1	1	2	1
1327	50	1	1	0	0	1	1	1	1	0	0	1	1
1328	55	1	1	1	1	3	3	2	3	3	2	3	3
1329	52	1	1	0	0	2	3	2	2	2	2	2	2
1330	50	1	1	1	1	2	3	3	2	2	3	3	2
1331	49	1	1	0	0	2	1	0	2	1	0	0	2
1332	58	1	1	1	1	3	3	3	3	3	3	3	3
1333	52	1	1	0	1	2	2	2	2	2	2	2	2
1334	50	1	1	0	0	1	0	0	1	0	0	0	1
1335	51	1	1	0	0	1	1	1	1	1	1	1	1
1336	50	1	1	0	1	0	0	1	0	0	0	1	0
1337	47	1	0	0	1	2	1	2	2	1	2	1	2
1338	57	1	1	0	0	1	0	0	1	0	0	0	1
1339	57	1	1	0	1	0	0	1	0	0	1	0	0
1340	55	1	1	0	1	2	1	1	2	1	1	1	2
1341	56	1	1	0	0	0	0	1	0	0	0	0	0
1342	55	1	1	0	1	1	1	1	1	0	0	0	1
1343	54	1	1	0	0	2	3	1	2	3	2	2	2
1344	54	1	1	0	1	0	0	1	0	0	0	0	0
1345	53	1	1	0	0	2	1	1	2	1	1	1	2
1346	54	1	1	1	1	3	2	2	3	3	2	2	3
1347	54	1	1	0	1	0	0	0	0	0	0	0	0
1348	53	1	1	0	0	1	0	1	1	0	0	0	1
1349	54	1	1	0	1	0	0	0	0	0	0	0	0
1350	52	1	1	1	1	3	3	3	3	3	3	2	3
1351	47	1	0	0	0	1	1	1	1	2	1	1	1
1352	52	1	1	1	1	3	3	3	3	3	3	3	3
1353	52	1	1	0	0	0	1	1	0	1	1	1	0
1354	51	1	1	1	1	2	2	2	2	3	3	2	1
1355	51	1	1	0	0	1	1	0	1	0	0	0	1
1356	51	1	1	1	0	3	1	2	3	2	1	1	3
1357	51	1	1	0	1	3	3	3	3	3	3	3	3
1358	51	1	1	0	1	0	0	0	0	0	0	0	0
1359	50	1	1	1	0	3	1	1	3	1	1	1	2
1360	50	1	1	1	0	3	1	0	3	3	0	1	3
1361	50	1	1	1	1	3	2	2	3	2	2	1	3
1362	50	1	1	0	1	1	1	1	1	1	2	1	1
1363	49	1	1	0	0	1	0	0	1	0	0	0	1
1364	49	1	1	1	1	3	3	3	3	3	3	3	3
1365	49	1	1	1	1	3	3	2	3	2	1	3	3
1366	49	1	1	0	0	2	2	2	2	2	2	2	2
1367	49	1	1	0	1	0	0	0	0	1	0	0	0
1368	48	1	1	0	0	2	1	1	2	2	1	0	2
1369	47	1	0	0	1	3	3	3	3	2	3	3	2
1370	47	1	0	0	1	2	1	1	2	2	1	2	2
1371	45	1	0	0	0	2	3	1	2	2	2	2	2
1372	40	1	0	0	0	1	0	0	1	0	0	0	0
1373	55	1	1	1	1	1	2	2	1	2	3	2	1
1374	49	1	1	0	1	1	1	2	1	1	1	1	1
1375	51	1	1	1	1	3	1	2	3	2	1	1	3
1376	38	1	0	0	0	0	0	0	0	0	0	1	0
1377	51	1	1	1	1	2	2	1	2	3	2	2	2
1378	49	1	1	1	1	3	3	3	3	3	3	2	3
1379	58	1	1	0	1	1	2	2	1	1	2	3	1
1380	54	1	1	0	0	2	2	1	2	2	2	2	1
1381	53	1	1	1	1	3	3	3	3	3	3	3	3
1382	52	1	1	0	1	3	3	2	3	3	2	2	3
1383	51	1	1	0	0	1	1	0	1	1	0	1	1
1384	50	1	1	0	1	3	3	1	3	3	2	2	3
1385	48	1	1	0	1	2	2	3	2	2	3	2	1
1386	48	1	1	0	0	2	2	1	2	1	1	2	2
1387	50	1	1	1	0	3	3	2	3	3	1	2	3
1388	48	1	1	0	0	2	1	1	2	1	1	1	2
1389	45	0	0	0	0	0	1	2	0	0	2	1	1
1390	41	1	0	0	0	2	2	1	2	2	1	2	2
1391	41	1	0	0	0	0	0	1	0	0	1	0	0
1392	52	1	1	0	0	1	1	0	1	1	0	1	1
1393	56	1	1	1	1	2	2	2	2	3	3	3	1
1394	50	1	1	0	0	1	1	2	1	0	3	1	1
1395	44	1	0	1	1	3	3	3	3	3	3	3	3
1396	51	1	1	0	1	2	2	2	2	2	2	1	2
1397	52	1	1	0	1	2	2	2	2	2	3	3	2
1398	55	1	1	0	0	1	2	1	1	1	2	2	1
1399	48	1	1	1	1	2	2	2	2	2	2	2	2
1400	45	1	0	0	0	3	3	3	3	3	3	3	3
1401	48	1	1	0	0	2	3	1	2	2	1	3	2
1402	47	1	0	0	0	2	2	3	2	2	3	3	2
1403	45	1	0	0	0	2	2	2	2	1	2	2	2
1404	60	1	1	0	0	0	0	0	0	0	0	0	0
1405	59	1	1	0	0	0	0	0	0	0	0	0	0
1406	59	1	1	1	1	3	3	3	3	3	3	3	3
1407	59	1	1	0	1	1	2	2	1	1	2	2	1
1408	59	0	1	0	0	0	0	0	0	1	1	0	1
1409	58	1	1	1	0	1	2	1	1	1	1	3	1
1410	58	1	1	0	1	3	3	2	3	3	2	2	3
1411	57	1	1	0	1	2	2	3	2	1	3	2	2
1412	56	1	1	0	0	2	1	1	2	2	0	1	2
1413	56	1	1	1	0	2	3	3	2	2	3	3	2
1414	55	1	1	0	0	2	3	3	2	1	3	3	2
1415	55	1	1	0	0	2	1	1	2	1	1	1	2
1416	55	1	1	0	1	3	3	2	3	3	2	3	3
1417	55	1	1	0	0	3	3	2	3	3	2	3	3
1418	54	1	1	0	1	1	1	2	1	3	3	3	1
1419	54	1	1	1	0	2	2	2	2	2	3	2	2
1420	53	1	1	1	1	3	3	3	3	3	3	3	3
1421	52	1	1	0	0	1	1	2	1	0	2	1	1
1422	51	1	1	0	1	0	2	0	0	1	1	2	0
1423	52	1	1	1	1	2	2	2	2	3	3	2	1
1424	51	1	1	0	0	1	0	1	1	0	1	0	1
1425	53	1	1	1	1	3	2	3	3	3	2	2	3
1426	51	1	1	1	1	2	2	1	2	3	1	2	2
1427	49	1	1	0	0	0	0	0	0	0	0	0	0
1428	50	1	1	0	0	0	0	0	0	0	1	0	0
1429	52	1	1	0	1	1	2	0	1	0	0	2	1
1430	53	1	1	0	0	1	0	1	1	0	1	0	1
1431	53	1	1	0	0	0	1	0	0	0	0	1	1
1432	49	1	1	1	1	3	3	3	3	3	3	3	3
1433	48	1	1	0	1	1	2	3	1	0	3	3	1
1434	51	1	1	0	0	0	0	0	0	0	1	0	0
1435	49	1	1	1	1	2	2	2	2	2	2	2	2
1436	46	1	0	1	1	2	2	2	2	3	2	3	2
1437	50	1	1	0	0	1	0	0	1	2	0	1	1
1438	48	1	1	0	0	2	2	0	2	2	1	1	2
1439	48	1	1	0	0	1	0	0	1	1	0	0	1
1440	48	1	1	0	0	1	0	0	1	1	0	0	1
1441	44	1	0	0	1	1	2	3	1	1	3	2	1
1442	47	1	0	0	0	2	1	0	2	1	0	1	2
1443	46	1	0	0	1	0	0	0	0	1	0	0	0
1444	46	1	0	0	0	2	2	2	2	1	2	1	2
1445	49	1	1	0	0	1	1	0	1	1	0	1	1
1446	44	1	0	0	0	1	1	0	1	2	1	0	1
1447	44	1	0	0	1	2	2	1	2	2	1	1	2
1448	42	1	0	1	0	3	3	3	3	3	3	3	3
1449	37	1	0	1	1	3	3	3	3	2	3	3	3
1450	52	1	1	0	1	0	0	0	0	0	1	0	0
1451	35	1	0	0	0	3	2	2	3	2	2	1	3
1452	41	1	0	0	1	1	1	0	1	2	0	1	1
1453	56	1	1	0	0	0	2	1	0	2	3	2	0
1454	59	1	1	1	0	2	3	2	2	3	2	3	3
1455	60	1	1	0	0	0	1	0	0	1	1	1	0
1456	54	1	1	0	0	1	2	2	1	1	2	2	1
1457	54	1	1	0	1	0	0	1	0	0	1	0	0
1458	46	1	0	0	1	2	1	1	2	1	1	1	1
1459	40	1	0	0	0	0	1	1	0	1	2	1	0
1460	44	1	0	0	0	1	2	3	1	1	3	2	1
1461	44	1	0	0	0	1	1	1	1	1	1	1	1
1462	51	1	1	0	1	0	0	0	0	1	0	0	0
1463	58	1	1	1	0	3	3	3	3	2	2	2	3
1464	41	1	0	0	0	1	1	1	1	1	1	1	1
1465	55	1	1	0	1	0	1	0	0	1	1	1	0
1466	49	1	1	0	0	0	0	0	0	0	0	0	0
1467	48	1	1	0	0	1	0	0	1	0	0	0	1
1468	42	1	0	0	0	2	2	2	2	2	2	1	2
1469	47	1	0	0	1	1	2	1	1	1	1	2	1
1470	39	1	0	0	0	2	3	2	2	2	2	3	2
1471	59	1	1	0	0	2	1	1	2	1	1	1	1
1472	59	1	1	1	1	3	3	3	3	3	3	3	3
1473	56	1	1	0	1	1	1	1	1	1	2	1	0
1474	54	1	1	1	1	2	2	2	2	3	1	2	2
1475	55	1	1	1	0	3	3	2	3	3	3	3	3
1476	52	1	1	0	0	3	3	2	3	3	2	2	3
1477	53	1	1	1	1	2	3	3	2	3	3	3	2
1478	51	1	1	0	0	2	2	0	2	2	1	1	1
1479	51	1	1	0	1	2	2	3	2	2	3	2	2
1480	51	1	1	0	1	3	3	3	3	3	3	3	3
1481	48	1	1	0	0	1	2	1	1	1	1	2	1
1482	51	1	1	1	1	3	3	2	3	3	2	3	2
1483	51	1	1	1	1	0	2	3	0	3	3	3	0
1484	48	1	1	0	1	2	2	3	2	2	3	2	2
1485	48	1	1	0	1	1	2	2	1	1	3	2	1
1486	48	1	1	0	0	2	1	1	2	1	0	1	2
1487	53	1	1	0	1	0	1	0	0	1	1	1	0
1488	53	1	1	1	0	2	3	2	2	2	3	3	2
1489	48	1	1	0	1	0	0	0	0	1	0	0	0
1490	45	1	0	0	0	1	1	1	1	2	2	1	1
1491	51	1	1	0	1	3	2	1	3	3	1	2	3
1492	47	1	0	1	1	1	2	2	1	0	2	3	1
1493	48	1	1	0	1	1	2	2	1	2	2	2	1
1494	47	1	0	0	0	2	1	0	2	2	1	1	2
1495	42	1	0	0	1	3	3	2	3	3	2	3	3
1496	36	1	0	0	1	1	1	2	1	1	2	1	1
1497	35	1	0	0	0	0	0	1	0	0	1	0	0
1498	48	1	1	0	0	0	0	0	0	0	0	1	0
1499	39	0	0	0	0	0	1	1	0	0	2	1	1
1500	54	1	1	0	1	2	3	3	2	1	3	3	2
1501	50	1	1	1	1	3	2	3	3	2	2	1	3
1502	51	1	1	0	0	3	3	3	3	3	3	3	3
1503	45	1	0	0	0	2	2	1	2	2	2	2	2
1504	52	1	1	0	0	2	0	0	2	2	0	0	2
1505	55	1	1	1	0	3	3	2	3	3	2	3	3
1506	48	1	1	1	1	3	3	2	3	3	2	2	3
1507	37	1	0	1	1	3	3	3	3	3	3	3	3
1508	45	1	0	0	1	0	0	2	0	0	1	0	0
1509	49	1	1	0	1	0	0	0	0	0	0	0	0
1510	49	1	1	1	1	2	2	2	2	2	2	2	2
1511	52	1	1	0	1	0	1	1	0	0	2	1	0
1512	60	1	1	1	1	3	3	3	3	3	3	3	3
1513	53	1	1	0	0	2	2	2	2	2	2	2	2
1514	59	1	1	0	0	0	1	2	0	1	2	2	0
1515	59	1	1	0	0	3	3	2	3	3	2	3	3
1516	58	1	1	0	0	1	0	0	1	0	0	0	0
1517	57	1	1	0	0	3	3	1	3	3	1	2	3
1518	56	1	1	0	0	3	3	2	3	3	2	3	3
1519	55	1	1	0	0	2	1	0	2	1	1	0	2
1520	54	1	1	0	1	1	1	3	1	1	3	1	1
1521	54	1	1	1	1	1	2	1	1	2	1	2	1
1522	49	1	1	0	0	1	1	1	1	1	1	1	1
1523	52	1	1	0	0	0	1	1	0	0	2	1	0
1524	51	1	1	0	0	2	2	2	2	2	3	2	2
1525	51	1	1	1	1	1	1	3	1	1	2	2	1
1526	48	1	1	1	1	3	2	3	3	2	2	2	3
1527	49	1	1	0	1	0	0	0	0	0	1	0	0
1528	52	1	1	0	1	1	2	2	1	1	2	2	1
1529	47	1	0	0	0	3	2	3	3	3	3	2	3
1530	49	1	1	1	1	3	3	3	3	3	3	3	3
1531	46	1	0	1	1	3	3	3	3	3	3	3	3
1532	50	1	1	0	0	3	3	3	3	3	3	2	3
1533	42	1	0	0	0	1	2	1	1	1	2	1	1
1534	48	1	1	1	1	3	3	3	3	3	3	3	3
1535	39	1	0	1	1	3	3	3	3	3	3	3	3
1536	39	1	0	1	0	3	3	3	3	3	3	3	3
1537	39	1	0	0	1	0	1	1	0	1	1	1	0
1538	36	1	0	0	0	3	3	1	3	3	1	2	3
1539	52	1	1	0	0	2	1	0	2	2	1	1	1
1540	35	1	0	0	0	1	1	0	1	1	0	0	1
1541	36	1	0	0	0	3	3	2	3	3	1	3	3
1542	36	0	0	0	1	1	2	3	1	0	3	2	1
1543	53	1	1	1	1	3	3	2	3	3	2	3	3
1544	44	1	0	0	1	1	1	0	1	1	1	1	1
1545	49	1	1	0	0	0	0	0	0	0	0	0	0
1546	50	1	1	1	1	1	2	1	1	3	2	2	1
1547	43	1	0	1	1	3	3	3	3	3	3	3	3
1548	50	1	1	0	0	0	1	0	0	1	1	1	0
1549	51	1	1	0	1	2	2	1	2	2	1	1	2
1550	57	1	1	0	0	1	1	3	1	3	3	3	1
1551	38	1	0	0	0	2	2	3	2	2	3	2	2
1552	42	1	0	0	0	2	2	2	2	2	2	2	2
1553	42	1	0	0	1	2	2	2	2	1	2	2	2
1554	55	1	1	0	1	1	1	1	1	1	1	1	1
1555	55	1	1	0	1	0	1	0	0	0	2	2	0
1556	50	1	1	0	0	2	2	3	2	2	3	2	2
1557	47	1	0	0	0	1	1	0	1	1	0	1	1
1558	42	1	0	0	0	0	0	0	0	0	0	0	0
1559	45	1	0	0	1	0	0	1	0	1	1	0	0
1560	46	0	0	0	0	0	1	2	0	0	2	1	0
1561	38	1	0	1	1	3	3	2	3	3	2	2	3
1562	50	1	1	1	1	3	3	3	3	3	3	3	3
1563	39	1	0	1	0	3	2	3	3	2	2	2	3
1564	51	1	1	0	0	2	1	1	2	2	1	1	2
1565	58	1	1	0	1	2	2	2	2	2	2	2	2
1566	53	1	1	0	1	0	1	0	0	0	1	2	0
1567	58	0	1	0	1	0	0	0	0	0	0	0	1
1568	49	1	1	1	0	3	3	3	3	3	3	3	3
1569	60	1	1	0	0	1	2	0	1	1	0	2	1
1570	60	1	1	0	1	2	2	1	2	2	1	2	2
1571	51	1	1	0	0	1	1	1	1	1	1	1	1
1572	60	1	1	0	0	3	3	0	3	3	1	3	3
1573	47	1	0	0	1	1	0	1	1	1	1	0	0
1574	58	1	1	1	1	3	3	3	3	3	3	3	3
1575	59	1	1	1	1	2	2	2	2	3	1	3	2
1576	59	1	1	0	1	1	1	2	1	1	2	2	0
1577	59	1	1	0	0	0	0	1	0	0	2	1	0
1578	44	1	0	0	0	1	1	1	1	1	2	2	1
1579	58	1	1	0	1	0	1	1	0	0	1	1	0
1580	58	1	1	1	1	3	3	3	3	3	3	3	3
1581	58	1	1	0	0	1	1	2	1	0	2	1	1
1582	58	1	1	0	1	2	2	2	2	2	2	2	2
1583	58	1	1	1	1	2	3	3	2	3	3	3	2
1584	57	1	1	0	1	0	1	1	0	0	1	2	0
1585	58	1	1	0	1	2	3	1	2	2	2	2	2
1586	56	1	1	1	1	2	2	2	2	3	2	2	2
1587	56	1	1	1	1	3	3	3	3	3	3	3	3
1588	56	1	1	0	1	0	1	1	0	1	2	1	0
1589	55	1	1	0	0	1	0	0	1	1	0	0	0
1590	56	1	1	1	0	2	3	3	2	3	3	3	2
1591	56	1	1	0	0	0	0	0	0	0	0	0	0
1592	56	1	1	0	1	1	1	1	1	2	1	2	1
1593	55	1	1	0	1	0	0	1	0	0	1	0	0
1594	55	1	1	0	1	0	1	1	0	1	1	2	0
1595	55	1	1	1	1	3	3	2	3	3	2	3	3
1596	54	1	1	1	1	3	2	2	3	2	2	2	3
1597	54	1	1	0	1	2	2	2	2	2	2	2	2
1598	55	1	1	0	1	1	2	1	1	1	2	2	1
1599	55	1	1	0	0	1	1	1	1	1	1	1	1
1600	55	1	1	0	1	0	0	1	0	0	1	1	0
1601	55	1	1	1	0	3	3	3	3	3	3	3	3
1602	55	1	1	0	0	1	2	2	1	1	2	2	1
1603	55	1	1	0	1	1	0	2	1	0	1	0	0
1604	54	1	1	0	1	1	1	2	1	1	2	1	1
1605	54	1	1	1	1	3	3	3	3	2	3	3	3
1606	54	1	1	0	1	1	3	1	1	1	1	3	1
1607	54	1	1	0	0	0	0	0	0	1	0	0	0
1608	55	1	1	1	1	2	3	3	2	2	3	3	2
1609	54	1	1	0	1	1	1	0	1	2	0	1	1
1610	50	1	1	0	0	0	0	0	0	1	0	0	0
1611	46	1	0	1	0	3	3	2	3	3	2	3	3
1612	53	1	1	0	1	3	3	2	3	3	3	2	3
1613	48	1	1	0	1	1	2	2	1	1	2	2	1
1614	50	1	1	0	1	2	2	2	2	2	3	2	2
1615	47	1	0	0	0	3	3	2	3	3	2	2	3
1616	44	1	0	1	1	2	1	1	2	2	1	1	2
1617	48	1	1	0	0	2	2	3	2	2	3	2	2
1618	49	1	1	0	0	2	2	2	2	3	2	2	2
1619	49	0	1	1	0	3	3	3	3	2	3	3	3
1620	49	1	1	0	0	2	1	0	2	2	0	0	2
1621	50	1	1	0	0	3	3	2	3	3	2	2	3
1622	47	1	0	0	0	0	0	0	0	0	0	0	0
1623	51	1	1	1	1	2	2	3	2	2	3	2	2
1624	52	1	1	0	1	1	0	0	1	0	0	0	1
1625	48	1	1	0	0	1	1	0	1	2	0	1	1
1626	52	1	1	0	0	2	2	3	2	2	3	2	2
1627	52	1	1	0	1	1	0	1	1	1	1	1	0
1628	50	1	1	0	1	1	0	0	1	1	0	0	1
1629	50	1	1	0	0	2	2	3	2	1	2	2	2
1630	53	1	1	0	1	2	2	1	2	3	1	1	2
1631	51	1	1	0	0	3	2	3	3	2	3	1	2
1632	51	1	1	1	1	1	3	1	1	3	2	3	1
1633	51	1	1	1	1	2	2	1	2	3	2	2	2
1634	48	1	1	1	1	2	3	2	2	3	3	3	2
1635	50	1	1	1	0	3	3	3	3	3	3	3	3
1636	53	1	1	0	1	1	1	0	1	2	1	0	1
1637	50	1	1	0	0	2	0	0	2	1	0	0	2
1638	49	1	1	1	1	3	3	3	3	3	2	3	3
1639	45	1	0	0	1	1	1	0	1	1	0	1	1
1640	48	1	1	1	1	3	3	2	3	3	3	3	3
1641	51	1	1	0	1	1	2	2	1	1	2	1	1
1642	43	1	0	1	0	3	3	3	3	3	3	3	3
1643	50	1	1	0	0	1	1	1	1	0	1	0	1
1644	46	1	0	0	0	1	1	0	1	2	0	1	1
1645	49	1	1	0	1	1	0	2	1	1	1	1	1
1646	50	1	1	0	0	2	1	2	2	2	2	0	2
1647	44	1	0	0	1	1	2	0	1	2	1	2	1
1648	47	1	0	0	1	3	3	3	3	3	3	2	3
1649	49	1	1	1	1	3	3	3	3	3	3	3	3
1650	53	1	1	0	0	3	2	0	3	3	0	1	3
1651	43	1	0	1	1	3	3	3	3	3	3	3	3
1652	48	1	1	0	1	2	2	1	2	2	1	2	2
1653	47	1	0	1	0	3	3	3	3	3	2	3	3
1654	52	1	1	1	1	3	3	3	3	3	3	3	3
1655	50	1	1	0	0	0	0	0	0	0	0	0	0
1656	48	1	1	0	0	0	0	0	0	0	0	0	0
1657	48	1	1	0	1	0	1	0	0	0	1	1	0
1658	45	1	0	0	0	1	1	1	1	0	1	1	1
1659	47	1	0	1	1	3	3	3	3	3	3	3	3
1660	48	1	1	0	1	2	2	2	2	2	2	2	2
1661	50	1	1	1	1	2	2	1	2	3	1	2	2
1662	50	1	1	1	0	3	2	2	3	3	2	2	3
1663	52	1	1	0	1	0	0	1	0	0	0	0	0
1664	52	1	1	1	0	2	2	3	2	3	3	3	1
1665	50	1	1	0	1	3	3	3	3	3	3	3	3
1666	49	1	1	1	1	3	3	3	3	3	3	3	3
1667	45	1	0	0	1	0	0	0	0	1	0	0	0
1668	49	1	1	1	1	2	2	3	2	3	3	2	2
1669	45	1	0	0	1	1	1	1	1	2	1	1	1
1670	43	1	0	0	0	1	2	1	1	1	1	2	1
1671	42	1	0	0	0	3	3	3	3	3	3	3	3
1672	47	1	0	1	1	1	3	3	1	2	3	3	1
1673	49	1	1	0	1	1	1	2	1	1	2	1	1
1674	49	1	1	0	0	0	1	0	0	1	0	1	0
1675	49	1	1	0	1	1	0	0	1	1	0	0	1
1676	43	1	0	0	1	0	0	0	0	1	1	0	0
1677	38	1	0	0	0	2	1	0	2	2	0	1	2
1678	46	1	0	0	0	2	1	0	2	1	0	1	2
1679	41	1	0	0	0	2	2	2	2	2	2	2	2
1680	50	1	1	1	1	3	3	3	3	3	3	3	3
1681	50	1	1	0	0	0	1	1	0	3	2	2	0
1682	47	1	0	1	1	2	3	2	2	3	3	3	2
1683	50	1	1	0	1	0	1	3	0	0	2	1	0
1684	43	1	0	0	1	1	1	1	1	1	1	1	1
1685	45	1	0	0	1	3	3	3	3	3	3	3	3
1686	47	1	0	0	0	2	0	0	2	1	0	0	2
1687	49	1	1	0	0	1	1	1	1	1	1	2	1
1688	49	1	1	1	1	1	2	3	1	2	3	3	1
1689	51	1	1	1	1	3	3	3	3	3	3	3	3
1690	50	1	1	0	1	2	0	0	2	1	0	0	2
1691	53	1	1	0	0	2	2	3	2	3	3	3	2
1692	50	1	1	0	1	1	0	1	1	1	1	0	1
1693	47	1	0	0	1	1	0	1	1	0	1	0	0
1694	46	1	0	0	1	0	1	1	0	0	1	1	0
1695	51	1	1	0	1	1	1	1	1	1	1	1	1
1696	48	1	1	0	0	3	2	0	3	3	0	1	3
1697	48	1	1	1	1	3	3	2	3	3	2	3	3
1698	48	1	1	1	0	2	2	2	2	2	2	2	2
1699	40	1	0	0	1	1	2	2	1	1	2	2	0
1700	40	1	0	1	0	1	2	0	1	2	0	2	1
1701	37	1	0	0	0	1	1	1	1	1	1	0	0
1702	40	1	0	0	1	0	0	0	0	1	0	0	0
1703	39	1	0	0	0	0	0	0	0	0	0	0	0
1704	40	1	0	0	0	2	2	1	2	2	1	1	2
1705	52	1	1	0	0	2	2	2	2	2	2	2	2
1706	37	1	0	0	0	1	0	1	1	1	0	0	1
1707	49	1	1	1	1	2	2	1	2	3	1	2	2
1708	47	1	0	0	0	3	2	1	3	3	1	2	3
1709	48	1	1	0	1	1	2	1	1	2	2	3	1
1710	39	1	0	0	0	2	0	1	2	1	1	0	2
1711	35	0	0	0	0	0	0	0	0	0	0	0	0
1712	48	1	1	0	0	2	2	2	2	2	2	1	2
1713	46	1	0	1	1	3	3	3	3	3	3	3	3
1714	49	1	1	0	0	2	1	1	2	2	1	1	2
1715	57	1	1	1	1	2	3	3	2	3	3	3	2
1716	53	1	1	0	0	0	0	0	0	0	0	0	0
1717	57	1	1	0	0	1	1	1	1	1	1	1	1
1718	62	1	1	1	1	1	2	3	1	2	3	3	1
1719	65	1	1	0	0	2	2	2	2	2	2	2	2
1720	58	1	1	1	1	3	2	3	3	3	3	2	3
1721	53	1	1	1	1	3	3	3	3	3	3	3	3
1722	56	1	1	0	1	3	3	2	3	3	2	3	3
1723	59	1	1	0	0	1	1	1	1	1	1	1	1
1724	51	1	1	0	1	0	0	1	0	0	0	0	0
1725	38	1	0	0	0	0	1	1	0	0	1	1	0
1726	47	1	0	1	1	3	3	3	3	3	3	3	3
1727	45	1	0	1	1	3	3	3	3	3	3	3	3
1728	51	1	1	0	0	1	1	1	1	1	2	1	0
1729	51	1	1	0	0	0	0	0	0	0	0	0	0
1730	50	1	1	1	1	2	3	3	2	2	3	3	2
1731	39	0	0	0	0	2	3	1	2	2	1	1	3
1732	50	1	1	0	0	1	0	0	1	1	0	0	1
1733	50	1	1	0	1	3	3	3	3	3	3	3	3
1734	48	1	1	0	0	0	1	0	0	1	1	1	0
1735	39	1	0	0	1	2	1	2	2	2	2	1	2
1736	54	1	1	0	1	2	2	3	2	2	3	2	2
1737	53	1	1	0	0	1	1	0	1	1	0	0	1
1738	50	1	1	1	1	3	3	3	3	3	3	3	3
1739	59	1	1	0	1	2	0	0	2	2	0	0	1
1740	60	1	1	0	1	3	3	2	3	3	2	3	3
1741	60	1	1	0	1	1	2	2	1	2	2	2	1
1742	59	1	1	0	1	1	1	1	1	0	0	0	1
1743	59	1	1	0	1	1	1	0	1	2	1	1	1
1744	58	1	1	0	0	2	1	1	2	2	1	1	2
1745	58	1	1	1	1	3	3	3	3	3	3	3	2
1746	57	1	1	0	1	3	3	3	3	3	3	3	3
1747	56	1	1	0	0	0	1	1	0	1	2	1	0
1748	56	1	1	0	0	3	2	1	3	2	0	2	3
1749	55	1	1	1	0	3	3	3	3	3	3	3	3
1750	54	1	1	1	1	2	2	0	2	3	1	2	2
1751	54	1	1	1	0	3	3	2	3	3	3	2	3
1752	50	1	1	1	0	2	3	3	2	2	3	3	2
1753	53	1	1	0	1	1	1	1	1	1	1	1	1
1754	52	1	1	1	1	3	3	2	3	3	2	3	3
1755	53	1	1	0	0	1	1	1	1	1	2	1	1
1756	53	1	1	0	0	1	1	0	1	1	1	1	1
1757	51	1	1	0	0	3	3	2	3	2	2	2	3
1758	52	1	1	0	0	3	3	2	3	3	2	2	3
1759	53	1	1	0	0	0	1	2	0	1	2	1	0
1760	48	0	1	0	1	1	1	1	1	1	1	0	1
1761	52	1	1	1	1	3	3	3	3	3	3	3	3
1762	49	1	1	0	0	0	0	0	0	0	0	0	0
1763	50	1	1	0	1	0	0	0	0	0	0	0	0
1764	52	1	1	0	0	0	0	0	0	1	1	1	0
1765	51	1	1	0	0	1	1	0	1	0	0	1	1
1766	50	1	1	0	1	2	2	1	2	3	2	2	2
1767	51	1	1	1	1	2	2	2	2	3	2	3	2
1768	47	1	0	1	1	2	3	2	2	2	3	3	2
1769	47	1	0	0	1	1	1	1	1	1	1	1	1
1770	48	1	1	0	0	0	0	0	0	0	1	0	0
1771	48	1	1	0	1	2	2	2	2	2	2	2	2
1772	50	1	1	1	0	3	2	3	3	3	2	2	3
1773	53	1	1	0	0	0	0	0	0	0	0	0	0
1774	50	1	1	1	1	2	3	3	2	2	3	3	2
1775	48	1	1	1	1	3	2	3	3	2	3	2	2
1776	49	1	1	0	0	3	3	2	3	3	2	2	3
1777	48	1	1	1	1	2	2	3	2	3	3	2	2
1778	49	1	1	0	1	0	0	1	0	0	1	2	0
1779	52	1	1	1	1	3	2	1	3	3	1	1	3
1780	47	1	0	0	0	1	0	0	1	1	0	0	1
1781	46	1	0	0	0	0	0	0	0	0	0	0	0
1782	48	1	1	0	0	1	0	3	1	0	3	1	0
1783	48	1	1	0	1	2	2	2	2	2	2	2	2
1784	44	1	0	1	1	2	1	0	2	2	0	1	2
1785	44	1	0	0	1	0	0	1	0	1	2	1	0
1786	47	1	0	0	1	0	0	0	0	0	0	0	0
1787	45	1	0	0	0	2	0	1	2	1	1	0	1
1788	45	1	0	0	0	1	0	0	1	2	0	0	1
1789	39	1	0	1	1	3	3	3	3	3	3	3	3
1790	41	1	0	0	1	2	2	2	2	2	2	2	2
1791	44	1	0	0	1	1	1	0	1	2	1	1	0
1792	50	1	1	1	1	3	3	3	3	3	3	3	3
1793	60	1	1	0	1	0	1	0	0	1	1	1	0
1794	43	1	0	1	1	3	2	2	3	3	1	2	3
1795	52	1	1	1	1	2	1	2	2	3	2	2	2
1796	52	1	1	0	1	1	1	0	1	2	1	1	1
1797	52	1	1	0	0	3	2	2	2	2	1	1	2
1798	41	1	0	0	1	1	1	1	1	0	0	1	1
1799	51	1	1	1	1	0	1	2	0	0	3	2	0
1800	50	1	1	0	1	3	2	1	3	3	1	2	3
1801	49	1	1	0	1	2	1	1	2	1	1	1	1
1802	48	1	1	0	0	2	0	1	2	2	1	0	1
1803	59	1	1	1	1	2	3	3	2	3	3	3	2
1804	59	1	1	0	0	2	3	1	2	2	1	2	2
1805	55	1	1	1	1	3	3	3	3	3	3	3	3
1806	56	1	1	0	1	3	3	2	3	3	2	2	3
1807	55	1	1	0	0	1	2	1	1	2	1	2	1
1808	55	1	1	0	1	0	0	0	0	0	0	0	0
1809	55	1	1	0	1	1	1	0	1	2	1	1	1
1810	53	1	1	1	0	2	2	1	2	3	1	2	2
1811	53	1	1	0	0	0	1	1	0	0	1	1	0
1812	53	1	1	0	0	2	1	1	2	1	0	1	2
1813	51	1	1	0	0	1	3	2	1	3	2	3	1
1814	51	1	1	0	1	2	2	3	2	2	3	2	2
1815	52	1	1	1	1	3	3	3	3	3	3	3	3
1816	47	1	0	0	0	0	1	0	0	1	1	2	0
1817	46	1	0	0	1	0	0	1	0	0	1	0	0
1818	48	1	1	0	1	1	1	0	1	2	0	1	1
1819	52	1	1	1	1	3	3	3	3	2	3	3	3
1820	51	1	1	1	1	2	2	1	2	2	0	1	2
1821	47	1	0	1	1	0	1	2	0	0	2	2	0
1822	48	1	1	1	1	3	2	2	3	3	1	2	3
1823	49	1	1	0	1	0	0	0	0	0	0	0	0
1824	46	1	0	0	1	2	1	1	2	2	1	1	2
1825	44	1	0	1	1	3	3	3	3	3	3	3	3
1826	46	1	0	0	0	1	0	0	1	2	0	0	1
1827	38	1	0	0	0	3	2	2	3	3	2	2	3
1828	48	0	1	0	0	0	0	0	0	0	0	0	0
1829	58	1	1	0	0	0	0	0	0	0	0	0	0
1830	59	1	1	0	1	1	0	0	1	0	0	0	1
1831	55	1	1	0	1	3	2	2	3	3	2	2	3
1832	53	1	1	0	0	1	2	2	1	2	3	2	1
1833	50	1	1	0	1	0	0	1	0	0	1	1	0
1834	56	1	1	1	1	3	2	2	3	3	2	2	3
1835	45	1	0	0	1	3	3	3	3	3	3	3	3
1836	44	1	0	0	1	0	0	0	0	0	0	0	0
1837	49	1	1	1	0	3	3	3	3	2	3	3	3
1838	56	1	1	0	1	1	1	3	1	1	2	2	1
1839	50	1	1	0	0	0	0	0	0	0	0	0	0
1840	37	0	0	0	0	0	0	0	0	0	0	0	0
1841	52	1	1	1	1	2	2	2	2	2	2	3	2
1842	50	1	1	0	1	1	2	2	1	2	2	2	1
1843	43	1	0	0	0	0	0	1	0	0	1	0	0
1844	51	1	1	1	1	3	3	3	3	3	3	3	3
1845	42	1	0	1	0	2	1	0	2	2	0	1	2
1846	55	1	1	1	1	1	3	3	1	1	3	3	2
1847	59	1	1	0	1	2	1	1	2	1	0	1	2
1848	59	1	1	1	1	0	1	3	0	1	3	2	0
1849	59	0	1	0	0	1	1	0	1	2	0	0	2
1850	58	1	1	1	1	3	1	2	3	2	1	1	3
1851	57	1	1	0	0	0	0	1	0	0	1	0	0
1852	57	1	1	1	1	3	3	2	3	3	2	3	3
1853	56	1	1	0	0	1	0	0	1	0	0	0	1
1854	55	1	1	1	1	3	3	3	3	3	3	3	3
1855	54	1	1	0	1	0	0	0	0	0	0	0	0
1856	54	1	1	1	0	3	2	2	3	2	1	2	3
1857	54	1	1	0	0	3	3	2	3	3	2	3	3
1858	53	1	1	1	1	2	3	3	2	2	3	3	2
1859	56	1	1	0	1	1	2	1	1	1	1	2	1
1860	50	1	1	0	1	3	3	3	3	3	3	3	3
1861	53	1	1	1	0	2	2	2	2	2	2	1	2
1862	48	1	1	1	1	1	2	3	1	1	3	3	1
1863	52	1	1	0	1	1	0	2	1	0	2	1	0
1864	48	1	1	1	1	2	2	3	2	2	3	2	2
1865	47	1	0	0	0	1	0	2	1	0	2	1	0
1866	52	1	1	1	1	2	3	3	2	3	3	3	3
1867	45	1	0	0	1	1	1	1	1	1	1	2	1
1868	50	1	1	0	0	1	1	0	1	0	0	1	1
1869	51	1	1	0	1	1	1	2	1	1	2	1	0
1870	50	1	1	0	1	0	0	0	0	1	0	0	0
1871	49	1	1	1	1	3	1	2	3	2	1	1	3
1872	53	1	1	1	1	3	3	3	3	3	3	3	3
1873	51	1	1	0	1	0	0	0	0	0	0	0	0
1874	47	1	0	0	1	1	2	2	1	1	3	1	0
1875	50	1	1	0	1	1	0	1	1	1	1	0	1
1876	48	1	1	0	1	0	0	1	0	0	1	1	0
1877	51	1	1	0	0	2	2	2	2	2	2	2	2
1878	53	1	1	1	1	2	3	3	2	3	3	3	2
1879	52	1	1	0	1	1	2	1	1	2	2	3	1
1880	45	1	0	1	1	2	2	2	2	3	2	2	2
1881	46	1	0	1	1	3	3	3	3	3	3	3	3
1882	47	1	0	0	0	2	1	0	2	2	0	0	2
1883	47	1	0	1	1	3	3	3	3	3	3	3	3
1884	48	1	1	0	1	2	2	3	2	2	3	2	2
1885	47	1	0	1	1	2	2	3	2	2	3	3	2
1886	52	1	1	0	0	0	0	1	0	0	0	0	0
1887	52	1	1	1	0	3	3	3	3	3	3	3	3
1888	45	1	0	0	1	0	0	0	0	0	0	0	0
1889	53	1	1	1	1	3	3	2	3	3	2	3	3
1890	52	1	1	0	1	0	0	0	0	0	0	0	0
1891	51	1	1	1	1	2	2	0	2	3	0	1	2
1892	48	1	1	0	0	1	1	1	1	1	1	1	1
1893	43	1	0	1	1	2	3	3	2	3	3	3	2
1894	52	1	1	0	1	1	2	2	1	1	2	2	1
1895	46	1	0	1	1	2	3	3	2	3	3	3	2
1896	50	1	1	1	1	3	1	3	3	3	3	1	2
1897	41	1	0	0	1	2	2	2	2	2	2	1	2
1898	49	1	1	0	0	0	0	0	0	0	0	0	0
1899	38	1	0	0	0	1	1	0	1	1	1	1	1
1900	47	1	0	1	1	3	2	3	3	3	3	2	3
1901	59	1	1	1	1	1	2	3	1	1	3	2	0
1902	50	1	1	1	1	3	3	3	3	3	3	3	3
1903	49	1	1	1	1	2	2	3	2	3	3	3	2
1904	57	1	1	0	0	1	1	1	1	0	1	1	1
1905	53	1	1	1	1	2	2	2	2	2	2	2	2
1906	53	1	1	0	0	2	2	2	2	1	1	2	2
1907	52	1	1	0	1	1	1	2	1	1	2	1	1
1908	49	1	1	1	0	3	3	3	3	3	3	3	3
1909	39	1	0	1	1	2	1	0	2	2	0	1	2
1910	50	1	1	1	0	3	3	3	3	3	3	3	3
1911	44	1	0	0	0	0	0	0	0	0	0	0	0
1912	45	1	0	1	0	3	2	2	3	3	2	2	3
1913	44	1	0	0	1	0	0	0	0	1	1	1	0
1914	40	1	0	1	0	3	3	3	3	3	3	3	3
1915	37	1	0	0	0	2	1	2	2	1	2	1	1
1916	58	1	1	0	1	0	0	0	0	0	0	0	0
1917	58	1	1	1	1	2	2	3	2	3	3	3	2
1918	58	1	1	1	0	3	3	1	3	3	1	2	3
1919	54	1	1	0	0	0	1	0	0	1	0	1	0
1920	56	1	1	1	1	1	3	3	1	3	3	3	1
1921	55	1	1	0	0	1	1	1	1	1	1	1	1
1922	55	1	1	0	0	0	1	1	0	0	3	2	0
1923	56	1	1	1	0	3	2	2	3	2	2	2	3
1924	53	1	1	0	0	2	2	1	2	2	1	1	2
1925	54	1	1	1	1	3	3	3	3	3	3	3	3
1926	54	1	1	0	0	1	1	2	1	1	2	1	1
1927	54	1	1	0	0	1	0	0	1	1	0	0	1
1928	53	1	1	0	1	0	1	2	0	0	2	2	0
1929	52	1	1	1	1	2	2	2	2	2	2	2	2
1930	52	1	1	0	1	1	1	1	1	1	1	1	0
1931	53	1	1	0	0	2	2	2	2	2	3	2	1
1932	47	0	0	0	0	0	1	0	0	0	0	0	1
1933	51	1	1	1	1	3	3	3	3	3	3	3	3
1934	49	1	1	1	1	2	2	2	2	3	2	2	2
1935	50	1	1	1	1	3	3	3	3	3	3	3	3
1936	52	1	1	0	1	1	1	1	1	1	1	1	1
1937	51	1	1	0	1	2	1	2	2	1	2	1	1
1938	51	1	1	1	1	2	2	2	2	2	2	2	2
1939	51	1	1	0	0	2	2	3	2	2	3	2	2
1940	50	1	1	1	1	3	3	3	3	3	3	3	3
1941	51	1	1	1	1	3	3	3	3	3	3	3	3
1942	49	1	1	0	1	1	1	2	1	1	2	1	1
1943	53	1	1	1	1	3	3	3	3	3	3	3	3
1944	50	1	1	0	0	0	0	0	0	0	0	0	0
1945	49	1	1	0	0	2	2	3	2	3	3	2	2
1946	50	1	1	1	1	2	2	2	2	2	2	2	2
1947	48	1	1	1	1	3	3	2	3	3	2	3	3
1948	52	1	1	1	1	3	2	2	3	2	2	2	3
1949	49	1	1	0	1	0	0	0	0	0	0	0	0
1950	50	1	1	0	0	2	2	2	2	2	2	2	2
1951	50	1	1	0	0	2	2	1	2	2	0	2	2
1952	48	1	1	0	1	0	0	1	0	0	1	1	0
1953	49	1	1	0	0	0	1	1	0	0	1	1	0
1954	51	1	1	1	0	3	2	2	3	2	2	1	3
1955	52	1	1	0	1	1	2	1	1	2	2	2	1
1956	46	0	0	0	0	2	2	1	2	3	2	1	2
1957	50	1	1	0	1	0	0	0	0	0	0	0	0
1958	48	1	1	1	0	2	2	2	2	3	2	2	2
1959	49	1	1	1	1	1	2	1	1	2	2	3	1
1960	51	1	1	0	0	0	0	0	0	0	0	0	0
1961	48	1	1	1	1	2	3	3	2	2	3	3	2
1962	53	1	1	1	0	3	2	3	3	3	3	2	3
1963	48	1	1	1	1	2	3	3	2	2	3	3	2
1964	49	1	1	0	0	0	0	0	0	0	0	0	0
1965	47	0	0	1	1	3	3	3	3	2	3	1	3
1966	48	1	1	1	0	3	3	3	3	3	3	3	3
1967	48	0	1	1	0	2	2	2	2	2	2	2	3
1968	47	1	0	0	1	2	2	2	2	1	2	2	2
1969	48	1	1	1	1	3	3	3	3	3	3	3	3
1970	46	1	0	1	1	3	3	2	3	3	3	3	3
1971	45	1	0	1	1	2	2	3	2	3	3	3	2
1972	48	1	1	1	0	3	2	2	3	2	2	2	3
1973	49	1	1	0	1	0	0	0	0	0	0	0	0
1974	52	1	1	1	1	3	3	3	3	3	3	3	3
1975	40	0	0	0	0	1	0	0	1	1	0	0	1
1976	46	1	0	0	0	1	1	2	1	1	2	1	1
1977	45	1	0	0	1	0	0	0	0	0	0	1	0
1978	42	1	0	0	0	0	0	0	0	0	0	0	0
1979	50	1	1	0	1	2	2	3	2	1	3	2	2
1980	53	1	1	0	0	0	0	0	0	0	0	0	0
1981	38	1	0	0	1	1	1	1	1	1	1	1	1
1982	52	1	1	0	1	1	2	2	1	2	3	2	1
1983	52	1	1	0	1	0	0	1	0	0	1	0	0
1984	47	1	0	1	0	3	3	3	3	3	3	3	3
1985	46	1	0	0	1	2	2	2	2	2	3	2	2
1986	45	1	0	1	1	3	3	3	3	3	3	3	3
1987	49	1	1	1	0	3	3	3	3	3	3	3	3
1988	51	1	1	0	0	1	1	1	1	0	1	0	1
1989	52	1	1	1	0	3	3	3	3	3	3	3	3
1990	48	1	1	0	0	0	0	1	0	0	1	0	0
1991	49	1	1	0	1	0	1	0	0	1	1	1	0
1992	39	1	0	1	1	3	3	2	3	3	2	2	3
1993	48	1	1	0	0	2	2	1	2	2	1	1	2
1994	51	1	1	0	1	0	0	0	0	0	0	0	0
1995	53	1	1	0	0	0	0	1	0	0	1	0	0
1996	55	1	1	0	0	1	2	1	1	2	2	2	1
1997	55	1	1	0	1	1	0	0	1	0	0	0	1
1998	52	1	1	1	0	3	3	2	3	2	2	3	3
1999	46	0	0	0	1	0	0	0	0	0	0	0	0
[truncated: 5,853 more rows]

## Sheet: Checkup 7852
Sex	Age	Weight	HightM	SBP	DBP	Pulse	BMIcal	Westcir	FBSSI	TCSI	TGSI	LDLSI	HDLSI	NonHDLSI	TCHDLSI	TGHDLSI	LDLHDLSI	nonHDLHDLSI	BUNSI	CrSI	UricSI	TyG	TyGBMI	TyGWC	METSIR	LAP	VAI	AIP	TyGQ	TGHDLQ	TyGBMIQM	METIRQ	LAPQ	TyGWCQ	AIPQQ	TGHDLSIQ	VIAQ
1	51	71	1.71	174	110	103	24.281	84	5.39	4.60305	1.70487	2.17223	1.65503	2.94802	2.78125	1.03011	1.3125	1.78125	5.712	99.008	0.3776	8.9091	216.322	748.364	34.149	32.3925	1.28975	0.013	3	3	3	2	3	3	1	1	1
0	57	75	1.6	133	97	77	29.2969	89	4.29	5.30127	0.609687	3.74968	1.26713	4.03413	4.18367	0.481155	2.95918	3.18367	4.284	70.72	0.4189	7.65255	224.196	681.077	40.256	18.9003	0.87393	-0.319	1	1	3	3	2	2	0	0	0
0	57	63	1.53	136	72	85	26.9127	81	5.17	4.47375	1.29841	2.94802	0.930954	3.5428	4.80556	1.39471	3.16667	3.80556	3.57	61.88	0.2891	8.59508	231.317	696.201	42.891	29.8634	2.42433	0.143	2	3	3	4	3	2	2	2	2
1	41	84	1.72	132	83	65	28.3937	94	4.785	5.12025	1.09518	3.12904	1.49987	3.62038	3.41379	0.730182	2.08621	2.41379	4.284	72.488	0.3658	8.34747	237.016	784.662	39.169	31.7602	0.938057	-0.137	1	2	3	3	3	3	1	1	1
0	45	47	1.58	86	55	67	18.8271	71	4.4	6.59426	1.69358	4.55133	1.26713	5.32713	5.20408	1.33654	3.59184	4.20408	2.856	53.04	0.1888	8.69951	163.787	617.666	27.756	22.0165	2.46765	0.127	2	3	1	1	2	1	2	2	2
1	45	63	1.8	149	92	115	19.4444	81	5.005	4.57719	4.44846	1.13783	1.39643	3.18076	3.27778	3.18559	0.814815	2.27778	2.856	73.372	0.3658	9.79406	190.44	793.319	30.976	71.1753	4.30479	0.504	4	4	1	1	4	3	3	3	3
1	51	66	1.7	128	77	52	22.8374	81	5.555	4.42203	0.541944	2.48254	1.68089	2.74114	2.63077	0.322415	1.47692	1.63077	4.641	97.24	0.354	7.79317	177.976	631.247	30.21	8.67111	0.402049	-0.495	1	1	1	1	1	1	0	0	0
1	45	54	1.7	128	76	74	18.6851	81	4.345	6.4391	1.17421	3.74968	2.14637	4.29273	3	0.54707	1.74699	2	4.284	89.284	0.3658	8.32069	155.473	673.976	23.552	18.7874	0.753379	-0.26	1	1	1	1	2	1	0	0	0
0	35	55	1.58	131	84	80	22.0317	76	5.5	4.96509	1.1855	3.1549	1.26713	3.69796	3.91837	0.93558	2.4898	2.91837	3.213	54.808	0.3009	8.56598	188.723	651.015	32.38	21.3391	1.70583	-0.027	2	2	1	2	2	1	1	1	2
1	36	61	1.71	126	84	63	20.8611	79	4.895	4.05999	0.790335	1.62917	2.06879	1.99121	1.9625	0.382028	0.7875	0.9625	4.998	87.516	0.3304	8.04398	167.807	635.475	26.246	11.0647	0.486503	-0.42	1	1	1	1	1	1	0	0	0
1	49	83	1.71	138	101	82	28.3848	91	6.82	8.01655	2.72101	5.40471	1.37057	6.64598	5.84906	1.98531	3.9434	4.84906	6.426	92.82	0.4543	9.61193	272.833	874.686	44.264	70.7463	2.46955	0.299	4	4	4	4	4	4	3	3	2
1	51	70	1.76	112	83	93	22.5981	81	4.675	5.37885	1.71616	3.38764	1.21541	4.16343	4.42553	1.412	2.78723	3.42553	5.712	92.82	0.3068	8.77338	198.262	710.644	33.896	27.4585	1.77039	0.149	3	3	2	2	2	2	2	2	2
1	43	64	1.7	139	90	63	22.1453	91	5.005	5.40471	1.27583	3.90484	0.905094	4.49961	5.97143	1.40961	4.31429	4.97143	4.284	94.588	0.4543	8.5451	189.234	777.604	35.43	33.1715	2.00638	0.149	2	3	1	2	3	3	2	2	2
1	42	78	1.73	119	78	71	26.0617	86	5.115	5.53401	0.67743	3.90484	1.31885	4.21515	4.19608	0.513652	2.96078	3.19608	4.284	72.488	0.3304	7.9338	206.768	682.307	36.489	14.226	0.633571	-0.292	1	1	2	2	1	2	0	0	0
1	39	75	1.7	138	98	93	25.9516	84	5.995	6.90458	5.02427	4.47375	1.03439	5.87018	6.675	4.85722	4.325	5.675	4.998	77.792	0.3835	10.0963	262.014	848.087	45.703	95.4612	5.86557	0.687	4	4	4	4	4	4	3	3	3
0	39	58	1.57	127	70	103	23.5304	81	4.785	4.31859	1.01615	2.71528	1.13783	3.18076	3.79545	0.893053	2.38636	2.79545	3.57	65.416	0.3422	8.27257	194.657	670.078	34.671	23.3713	1.67477	-0.051	1	2	2	2	2	1	1	1	2
1	57	60	1.65	140	89	63	22.0386	84	4.84	4.88751	2.57424	2.92216	0.775795	4.11171	6.3	3.31819	3.76667	5.3	3.927	100.776	0.3127	9.21354	203.053	773.937	38.89	48.9105	4.37045	0.521	4	4	2	3	4	3	3	3	3
1	50	57	1.63	140	90	72	21.4536	76	5.115	6.25808	1.82906	4.21515	1.21541	5.04267	5.14894	1.50489	3.46809	4.14894	4.641	84.864	0.2714	8.92705	191.517	678.456	32.604	20.1197	1.818	0.176	3	3	1	2	2	2	2	2	2
0	47	55	1.56	140	92	76	22.6003	71	4.62	4.86165	0.790335	2.56012	1.93949	2.92216	2.50667	0.407497	1.32	1.50667	3.57	69.836	0.2714	7.98616	180.489	567.018	28.645	10.2744	0.684697	-0.387	1	1	1	1	1	1	0	0	0
0	46	74	1.55	146	90	83	30.8012	91	9.405	5.58573	1.94197	3.49108	1.21541	4.37031	4.59574	1.59778	2.87234	3.59574	3.57	45.968	0.3835	9.59601	295.569	873.237	49.936	64.0849	2.8783	0.204	4	3	4	4	4	4	2	2	3
1	42	69	1.68	144	100	89	24.4473	84	5.61	7.13732	1.12905	5.45643	1.16369	5.97362	6.13333	0.970231	4.68889	5.13333	5.712	91.936	0.5015	8.537	208.706	717.108	36.72	21.452	1.21034	-0.013	2	3	2	3	2	2	1	1	1
0	42	60	1.65	113	79	97	22.0386	81	4.565	6.77528	0.869369	5.04267	1.34471	5.43057	5.03846	0.646509	3.75	4.03846	3.213	64.532	0.3481	8.0695	177.84	653.629	30.64	19.9955	1.25611	-0.187	1	2	1	1	2	1	0	0	1
1	41	76	1.69	132	88	89	26.6097	84	4.84	6.74942	1.51293	4.86165	1.18955	5.55987	5.67391	1.27185	4.08696	4.67391	5.355	95.472	0.4602	8.68203	231.026	729.29	39.871	28.7456	1.51469	0.104	2	3	3	3	3	2	2	2	2
1	39	69	1.78	126	87	80	21.7776	84	4.895	5.24955	0.914531	3.33592	1.49987	3.74968	3.5	0.60974	2.22414	2.5	5.355	96.356	0.413	8.18994	178.357	687.955	29.807	17.3761	0.807989	-0.215	1	2	1	1	1	2	0	0	0
1	38	66	1.7	144	99	96	22.8374	76	4.73	4.99095	1.46777	2.40497	1.91363	3.07732	2.60811	0.767007	1.25676	1.60811	3.927	110.5	0.2419	8.62873	197.058	655.784	30.303	16.1454	0.897412	-0.114	2	2	2	1	1	1	1	1	0
1	50	65	1.68	114	85	70	23.03	86	4.675	4.37031	0.587106	2.53426	1.57745	2.79286	2.77049	0.372187	1.60656	1.77049	4.641	98.124	0.3363	7.70075	177.349	662.264	30.267	12.3292	0.490612	-0.432	1	1	1	1	1	1	0	0	0
1	48	84	1.71	125	75	84	28.7268	91	6.82	3.33592	1.69358	1.68089	0.879235	2.45668	3.79412	1.92619	1.91176	2.79412	4.641	99.892	0.472	9.13777	262.499	831.537	48.773	44.033	2.37957	0.286	3	4	4	4	3	4	2	2	2
1	47	80	1.7	133	81	70	27.6817	91	14.08	7.13732	3.15005	4.62891	1.06025	6.07706	6.73171	2.97104	4.36585	5.73171	3.927	73.372	0.2596	10.4832	290.194	953.975	49.741	81.9013	3.74897	0.473	4	4	4	4	4	4	3	3	3
1	44	63	1.7	138	101	66	21.7993	76	5.115	6.6977	1.32099	4.78407	1.31885	5.37885	5.07843	1.00162	3.62745	4.07843	4.641	94.588	0.3717	8.60163	187.509	653.724	31.68	14.5309	1.20027	0	2	3	1	1	1	1	1	1	1
1	47	66	1.67	110	90	62	23.6652	79	5.28	5.89604	0.914531	3.9307	1.55159	4.34445	3.8	0.589415	2.53333	2.8	5.712	91.052	0.3304	8.26565	195.609	652.986	32.429	12.8034	0.703593	-0.229	1	2	2	2	1	1	0	0	0
0	38	55	1.57	125	83	60	22.3133	74	5.5	5.40471	1.58067	3.1549	1.52573	3.87898	3.54237	1.03601	2.0678	2.54237	6.069	67.184	0.2891	8.85367	197.554	655.171	31.893	25.2907	1.8268	0.017	3	3	2	1	2	1	1	1	2
1	36	62	1.71	132	93	71	21.2031	74	4.73	5.19783	0.756464	2.87044	1.99121	3.20662	2.61039	0.379902	1.44156	1.61039	4.284	91.936	0.3363	7.96589	168.902	589.476	26.728	6.80817	0.449513	-0.42	1	1	1	1	1	1	0	0	0
0	38	56	1.6	123	88	76	21.875	76	4.4	5.27541	1.03873	2.68942	2.12051	3.1549	2.4878	0.489848	1.26829	1.4878	3.57	70.72	0.3245	8.21067	179.608	624.011	27.454	18.6971	0.896528	-0.31	1	1	1	1	2	1	0	0	0
0	43	47	1.57	125	74	78	19.0677	71	4.29	6.23222	0.948402	3.46522	2.32739	3.90484	2.67778	0.407497	1.48889	1.67778	3.927	57.46	0.2301	8.09438	154.341	574.701	23.227	12.3292	0.747648	-0.387	1	1	1	1	1	1	0	0	0
1	35	64	1.73	132	95	80	21.3839	79	4.62	5.74088	1.35486	3.23248	1.88777	3.85312	3.0411	0.717705	1.71233	2.0411	6.783	93.704	0.4248	8.52516	182.302	673.488	28.219	18.968	0.902733	-0.143	2	2	1	1	2	1	1	1	0
0	39	60	1.57	140	87	83	24.3418	84	5.17	6.33566	1.00485	4.44789	1.42229	4.91337	4.45455	0.706504	3.12727	3.45455	4.641	56.576	0.2124	8.33878	202.981	700.458	34.16	26.1262	1.34849	-0.149	1	2	2	2	2	2	1	0	1
1	53	78	1.66	133	82	79	28.306	86	7.975	3.69796	3.15005	1.37057	0.879235	2.81872	4.20588	3.58272	1.55882	3.20588	4.284	89.284	0.3363	9.9148	280.648	852.673	50.929	66.1511	4.21844	0.554	4	4	4	4	4	4	3	3	3
1	55	55	1.61	121	98	89	21.2183	74	5.39	4.37031	0.756464	2.5084	1.52573	2.84458	2.86441	0.495804	1.64407	1.86441	5.355	78.676	0.354	8.09651	171.794	599.142	28.998	6.80817	0.586441	-0.301	1	1	1	1	1	1	0	0	0
1	54	87	1.78	130	97	62	27.4587	86	5.335	5.45643	2.33713	3.31006	1.08611	4.37031	5.02381	2.15183	3.04762	4.02381	6.783	98.124	0.3245	9.21428	253.012	792.428	44.037	49.0798	2.57786	0.332	4	4	4	4	4	3	3	3	3
1	53	65	1.66	111	79	76	23.5883	84	4.895	5.58573	0.812916	3.6721	1.55159	4.03413	3.6	0.523925	2.36667	2.6	3.213	72.488	0.3009	8.07216	190.409	678.061	31.812	15.4454	0.666144	-0.284	1	1	1	1	1	1	0	0	0
1	41	65	1.73	149	97	69	21.7181	81	4.84	4.24101	0.530654	2.71528	1.29299	2.94802	3.28	0.410408	2.1	2.28	3.927	79.56	0.4071	7.63434	165.803	618.381	30.021	8.49046	0.525152	-0.387	1	1	1	1	1	1	0	0	0
1	41	64	1.6	125	77	69	25	81	5.225	5.17197	1.3097	3.25834	1.31885	3.85312	3.92157	0.99306	2.47059	2.92157	3.927	86.632	0.3894	8.61432	215.358	697.76	36.393	20.9552	1.18025	-0.004	2	3	3	2	2	2	1	1	1
1	50	85	1.81	148	105	82	25.9455	91	6.655	4.65477	1.8968	2.06879	1.70675	2.94802	2.72727	1.11136	1.21212	1.72727	6.069	81.328	0.3835	9.22661	239.389	839.621	37.263	49.3169	1.4541	0.045	4	3	3	3	4	4	1	1	1
1	50	76	1.67	135	85	75	27.2509	86	4.73	5.48229	1.87422	3.38764	1.24127	4.24101	4.41667	1.50992	2.72917	3.41667	5.712	96.356	0.4071	8.87319	241.802	763.094	40.989	39.3587	1.81663	0.179	3	3	4	3	3	3	2	2	2
1	51	63	1.73	125	80	77	21.0498	81	4.84	5.9219	0.925821	3.98242	1.52573	4.39617	3.88136	0.606805	2.61017	2.88136	3.927	81.328	0.2419	8.19091	172.417	663.464	28.667	14.8131	0.788768	-0.215	1	2	1	1	1	1	0	0	0
1	41	84	1.65	138	90	90	30.854	97	5.72	5.48229	1.15163	3.77554	1.18955	4.29273	4.6087	0.968122	3.17391	3.6087	6.783	80.444	0.2714	8.57622	264.611	831.893	46.224	36.8522	1.22266	-0.013	2	3	4	4	3	4	1	1	1
1	52	104	1.75	140	86	71	33.9592	112	6.215	4.96509	0.812916	3.25834	1.34471	3.62038	3.69231	0.604528	2.42308	2.69231	6.069	70.72	0.3776	8.31091	282.232	930.822	48.965	38.2071	0.831823	-0.222	1	2	4	4	3	4	0	0	0
1	49	70	1.68	142	92	87	24.8016	89	5.225	5.48229	4.2791	2.35325	1.16369	4.31859	4.71111	3.67717	2.02222	3.71111	5.355	83.98	0.3835	9.79827	243.013	872.046	41.33	102.698	4.82272	0.566	4	4	4	3	4	4	3	3	3
1	50	66	1.7	135	86	92	22.8374	76	4.62	5.81846	1.46777	4.18929	0.956814	4.86165	6.08108	1.53401	4.37838	5.08108	5.712	73.372	0.295	8.6052	196.52	653.996	36.036	16.1454	1.79482	0.185	2	3	2	2	1	1	2	2	2
1	50	60	1.61	125	82	75	23.1473	81	4.565	6.0512	0.733883	4.29273	1.42229	4.62891	4.25455	0.515986	3.01818	3.25455	5.355	114.92	0.2773	7.90008	182.865	639.907	31.44	11.7421	0.638926	-0.284	1	1	1	1	1	1	0	0	0
1	52	67	1.63	123	81	74	25.2174	86	4.62	6.10292	1.59196	4.08585	1.29299	4.80993	4.72	1.23122	3.16	3.72	7.14	108.732	0.3304	8.68643	219.049	747.033	36.962	33.4312	1.54635	0.09	2	3	3	3	3	3	2	2	2
1	48	70	1.72	126	70	71	23.6614	81	4.675	5.68916	2.55165	3.59452	0.930954	4.75821	6.11111	2.7409	3.86111	5.11111	5.712	97.24	0.413	9.17004	216.976	742.773	39.492	40.8265	3.35497	0.438	3	4	3	3	3	3	3	3	3
1	51	60	1.73	139	90	79	20.0474	81	5.005	5.53401	1.50164	2.66356	2.17223	3.36178	2.54762	0.691289	1.22619	1.54762	3.213	90.168	0.4366	8.70806	174.574	705.353	26.031	24.0262	0.920473	-0.161	2	2	1	1	2	2	0	0	0
1	43	70	1.66	137	87	68	25.4028	81	5.94	6.6977	1.02744	4.80993	1.42229	5.27541	4.70909	0.722381	3.38182	3.70909	4.641	91.052	0.3009	8.49984	215.92	688.487	36.299	16.439	0.851116	-0.143	2	2	3	2	1	2	1	1	0
1	44	74	1.69	132	72	98	25.9095	89	4.73	6.9563	1.85164	4.78407	1.31885	5.63745	5.27451	1.40398	3.62745	4.27451	4.998	80.444	0.3009	8.86107	229.585	788.635	38.334	44.4394	1.79797	0.146	3	3	3	3	3	3	2	2	2
1	45	82	1.72	139	98	67	27.7177	97	5.335	7.42177	2.69843	5.12025	1.06025	6.36152	7	2.54508	4.82927	6	4.641	103.428	0.4307	9.35803	259.383	907.729	45.315	86.3498	3.4207	0.407	4	4	4	4	4	4	3	3	3
1	48	74	1.7	144	103	88	25.6055	84	6.6	5.99948	2.05487	3.51694	1.55159	4.44789	3.86667	1.32436	2.26667	2.86667	3.213	88.4	0.3127	9.29835	238.089	781.062	37.811	39.0426	1.61115	0.121	4	3	3	3	3	3	2	2	2
1	39	69	1.74	153	110	82	22.7903	81	5.17	5.55987	0.835497	4.05999	1.11197	4.44789	5	0.751365	3.65116	4	3.927	95.472	0.2714	8.15421	185.837	660.491	33.74	13.368	0.937951	-0.125	1	2	1	2	1	1	1	1	1
1	50	66	1.7	119	82	63	22.8374	76	4.785	6.15464	0.45162	4.31859	1.62917	4.52547	3.77778	0.277209	2.65079	2.77778	5.712	102.544	0.531	7.46164	170.404	567.085	29.581	4.96782	0.324339	-0.553	1	1	1	1	1	1	0	0	0
1	37	74	1.75	133	92	68	24.1633	84	4.895	6.1805	3.13876	3.4135	1.31885	4.86165	4.68627	2.37992	2.58824	3.68627	4.641	73.372	0.3835	9.42311	227.693	791.541	37.621	59.6364	2.98752	0.377	4	4	3	3	4	3	3	3	3
1	54	63	1.69	136	104	62	22.0581	81	5.225	6.28394	1.84035	3.69796	1.73261	4.55133	3.62687	1.06219	2.13433	2.62687	4.998	89.284	0.3953	8.95448	197.518	725.313	30.779	29.4456	1.34845	0.025	3	3	2	1	3	2	1	1	1
1	45	66	1.63	118	82	83	24.841	84	5.115	5.35299	0.688721	3.64624	1.39643	3.95656	3.83333	0.493201	2.61111	2.83333	4.284	114.92	0.4425	7.95033	197.494	667.827	34.308	13.0857	0.609984	-0.31	1	1	2	2	1	1	0	0	0
1	44	70	1.72	143	98	98	23.6614	86	6.215	6.12878	2.10003	3.95656	1.21541	4.91337	5.04255	1.72784	3.25532	4.04255	3.213	87.516	0.3894	9.25999	219.105	796.359	37.001	44.1007	2.24549	0.238	4	4	3	3	3	4	2	2	2
1	42	63	1.75	125	88	73	20.5714	79	5.06	4.26687	0.914531	2.56012	1.29299	2.97388	3.3	0.707298	1.98	2.3	5.712	92.82	0.3894	8.22309	169.161	649.624	29.339	12.8034	0.906987	-0.149	1	2	1	1	1	1	1	0	0
1	47	57	1.7	118	73	70	19.7232	76	4.895	4.26687	0.89195	2.19809	1.65503	2.61184	2.57812	0.538933	1.32812	1.57812	3.927	70.72	0.3068	8.16494	161.039	620.535	26.312	9.81145	0.678656	-0.268	1	1	1	1	1	1	0	0	0
1	38	74	1.75	148	81	72	24.1633	89	5.94	4.93923	1.43389	2.6377	1.65503	3.2842	2.98438	0.866386	1.59375	1.98438	6.069	81.328	0.3068	8.83317	213.438	786.152	33.913	34.4135	1.15231	-0.06	3	2	2	2	3	3	1	1	1
1	44	69	1.68	140	92	68	24.4473	84	5.445	5.84432	1.00485	3.82726	1.55159	4.29273	3.76667	0.647629	2.46667	2.76667	6.069	88.4	0.3363	8.39061	205.128	704.811	33.796	19.0922	0.807902	-0.187	2	2	2	2	2	2	0	0	0
1	50	97	1.81	125	82	60	29.6084	91	5.115	5.58573	1.56938	3.8014	1.06025	4.52547	5.26829	1.48019	3.58537	4.26829	7.854	106.08	0.3599	8.77393	259.782	798.427	46.117	40.8039	1.79681	0.17	3	3	4	4	3	4	2	2	2
1	44	59	1.68	127	97	66	20.9042	76	5.17	3.95656	0.587106	2.04293	1.65503	2.30153	2.39062	0.354741	1.23438	1.39062	7.14	106.08	0.3835	7.80139	163.082	592.906	27.542	6.45817	0.434152	-0.456	1	1	1	1	1	1	0	0	0
1	48	75	1.74	148	78	72	24.7721	84	5.115	5.68916	2.91295	3.33592	1.00853	4.68063	5.64103	2.8883	3.30769	4.64103	5.355	88.4	0.472	9.39241	232.67	788.963	41.215	55.3461	3.57758	0.461	4	4	3	3	4	3	3	3	3
1	36	71	1.82	129	84	63	21.4346	81	4.235	5.09439	2.03229	3.05146	1.11197	3.98242	4.5814	1.82764	2.74419	3.5814	4.641	90.168	0.2596	8.84362	189.559	716.333	33.11	32.5167	2.35421	0.262	3	4	1	2	3	2	2	2	2
1	39	65	1.75	108	79	63	21.2245	81	5.39	3.74968	0.496782	1.91363	1.60331	2.14637	2.33871	0.309848	1.19355	1.33871	4.641	99.008	0.2891	7.67601	162.919	621.757	28.179	7.94852	0.4011	-0.509	1	1	1	1	1	1	0	0	0
1	42	73	1.74	121	72	82	24.1115	89	5.28	4.60305	0.948402	2.56012	1.60331	2.99974	2.87097	0.591528	1.59677	1.87097	3.927	89.284	0.3304	8.30202	200.174	738.88	32.833	22.7617	0.787646	-0.229	1	2	2	2	2	3	0	0	0
1	47	91	1.69	128	76	75	31.8616	102	5.225	5.68916	3.03715	3.36178	0.930954	4.75821	6.11111	3.2624	3.61111	5.11111	6.783	106.964	0.3658	9.45544	301.266	964.455	54.492	112.374	4.25011	0.513	4	4	4	4	4	4	3	3	3
1	46	76	1.75	154	115	63	24.8163	86	4.785	6.64598	1.28712	4.93923	1.11197	5.53401	5.97674	1.15751	4.44186	4.97674	6.069	87.516	0.4012	8.50896	211.161	731.771	37.37	27.0295	1.46646	0.064	2	3	2	3	2	2	2	2	1
1	50	66	1.77	155	110	63	21.0667	86	5.72	6.36152	2.17907	4.03413	1.31885	5.04267	4.82353	1.65225	3.05882	3.82353	5.355	70.72	0.2832	9.21393	194.108	792.398	32.121	45.7604	2.27936	0.217	4	4	2	1	3	3	2	2	2
1	50	79	1.66	139	101	84	28.6689	91	5.61	4.13757	1.81777	1.60331	1.70675	2.43082	2.42424	1.06505	0.939394	1.42424	4.998	78.676	0.3009	9.01323	258.399	820.204	40.373	47.2621	1.31727	0.029	3	3	4	3	4	4	1	1	1
1	42	81	1.73	143	83	83	27.0641	84	4.675	5.7926	3.36457	2.92216	1.31885	4.47375	4.39216	2.55114	2.21569	3.39216	5.355	93.704	0.4189	9.4466	255.663	793.514	42.316	63.9268	3.0096	0.407	4	4	4	4	4	3	3	3	3
1	45	70	1.65	141	95	60	25.7117	84	5.83	5.01681	2.1452	3.10318	0.930954	4.08585	5.38889	2.3043	3.33333	4.38889	5.355	86.632	0.3068	9.21732	236.993	774.255	43.022	40.7587	2.79693	0.362	4	4	3	4	3	3	3	3	3
1	39	100	1.73	146	82	77	33.4124	114	3.85	5.71502	1.6597	3.82726	1.13783	4.57719	5.02273	1.45865	3.36364	4.02273	4.641	99.008	0.4012	8.54578	285.535	974.219	49.967	81.3255	2.06342	0.164	2	3	4	4	4	4	2	2	2
1	47	65	1.64	138	87	85	24.1672	84	4.345	5.76674	1.49035	3.23248	1.86191	3.90484	3.09722	0.80044	1.73611	2.09722	4.998	82.212	0.3953	8.5591	206.849	718.965	32.044	28.3166	1.00471	-0.097	2	2	2	1	2	2	1	1	1
1	50	76	1.73	127	100	71	25.3934	91	5.06	7.31833	0.914531	5.09439	1.81019	5.50815	4.04286	0.505213	2.81429	3.04286	6.069	114.036	0.4071	8.22309	208.812	748.301	33.346	23.7778	0.668869	-0.292	1	1	2	2	2	3	0	0	0
1	49	75	1.67	140	93	71	26.8923	84	4.345	5.48229	3.18392	3.12904	0.905094	4.57719	6.05714	3.51778	3.45714	5.05714	6.069	77.792	0.3245	9.31821	250.588	782.729	46.036	60.4945	4.1648	0.547	4	4	4	4	4	3	3	3	3
1	49	64	1.7	136	85	77	22.1453	71	5.555	5.94776	2.30326	3.46522	1.42229	4.52547	4.18182	1.6194	2.43636	3.18182	4.284	81.328	0.3363	9.24009	204.625	656.047	33.199	13.8196	1.7984	0.21	4	3	2	2	1	1	2	2	2
1	53	70	1.65	134	85	78	25.7117	84	4.785	6.28394	3.31941	3.51694	1.24127	5.04267	5.0625	2.6742	2.83333	4.0625	4.641	80.444	0.3363	9.45634	243.138	794.333	40.834	63.0688	3.24591	0.427	4	4	4	3	4	3	3	3	3
1	51	67	1.65	135	89	63	24.6097	81	4.565	5.01681	0.812916	3.2842	1.37057	3.64624	3.66038	0.593122	2.39623	2.66038	4.998	83.096	0.295	8.00236	196.936	648.191	33.92	13.0067	0.710945	-0.229	1	2	2	2	1	1	0	0	0
1	38	80	1.74	140	90	80	26.4236	86	6.71	5.45643	0.982274	3.49108	1.52573	3.9307	3.57627	0.643806	2.28814	2.57627	4.998	78.676	0.472	8.57678	226.629	737.603	37.594	20.6278	0.788065	-0.194	2	2	3	3	2	3	0	0	0
1	48	65	1.72	138	85	74	21.9713	81	4.84	6.23222	1.49035	3.82726	1.73261	4.49961	3.59701	0.860175	2.20896	2.59701	4.998	79.56	0.3304	8.66699	190.425	702.026	29.94	23.8455	1.0942	-0.066	2	2	1	1	2	2	1	1	1
1	51	78	1.72	129	89	83	26.3656	91	4.675	6.23222	1.86293	4.05999	1.31885	4.91337	4.72549	1.41254	3.07843	3.72549	3.927	80.444	0.4189	8.85545	233.479	805.846	38.994	48.4363	1.83181	0.149	3	3	3	3	4	4	2	2	2
1	48	68	1.7	121	77	76	23.5294	86	5.335	4.96509	2.21294	3.1549	0.801655	4.16343	6.19355	2.76046	3.93548	5.19355	4.998	71.604	0.2242	9.15968	215.522	787.732	40.881	46.4717	3.5981	0.441	3	4	3	3	4	3	3	3	3
1	53	58	1.64	135	82	67	21.5645	81	5.995	4.47375	0.846788	3.1549	0.930954	3.5428	4.80556	0.909591	3.38889	3.80556	4.641	72.488	0.3068	8.31569	179.324	673.571	34.174	13.5486	1.16809	-0.041	1	2	1	2	1	1	1	1	1
1	41	75	1.68	125	103	89	26.5731	61	4.895	6.64598	2.31455	4.52547	1.06025	5.58573	6.26829	2.18302	4.26829	5.26829	2.856	77.792	0.354	9.1185	242.307	556.228	42.557	-9.25821	1.88943	0.338	3	4	4	4	1	1	3	3	2
1	44	65	1.7	127	72	70	22.4913	76	5.06	4.24101	0.846788	2.32739	1.52573	2.71528	2.77966	0.555005	1.52542	1.77966	7.854	70.72	0.4484	8.14613	183.217	619.106	30.649	9.31467	0.65452	-0.252	1	1	1	1	1	1	0	0	0
1	41	75	1.75	108	77	74	24.4898	81	5.06	7.88725	3.29683	5.43057	0.956814	6.93044	8.24324	3.44563	5.67568	7.24324	5.355	101.66	0.3599	9.5054	232.785	769.937	41.815	52.7492	4.14096	0.538	4	4	3	4	4	3	3	3	3
1	45	86	1.74	144	90	85	28.4053	91	5.61	3.95656	3.5678	1.55159	0.775795	3.18076	5.1	4.59889	2	4.1	5.712	88.4	0.3953	9.68757	275.179	881.569	52.238	92.7628	5.71825	0.663	4	4	4	4	4	4	3	3	3
1	48	66	1.68	107	85	67	23.3844	76	5.17	4.65477	1.11776	2.58598	1.55159	3.10318	3	0.720396	1.66667	2	4.998	81.328	0.3245	8.44527	197.487	641.84	32.317	12.2954	0.832514	-0.143	2	2	2	2	1	1	1	1	0
0	37	50	1.57	119	86	86	20.2848	76	5.28	5.22369	0.711302	3.05146	1.83605	3.38764	2.84507	0.387409	1.66197	1.84507	3.927	53.04	0.2006	8.01434	162.569	609.09	26.363	12.8034	0.737487	-0.409	1	1	1	1	1	1	0	0	0
0	38	57	1.52	107	71	86	24.6711	102	4.73	7.93897	3.34199	4.18929	2.22395	5.71502	3.56977	1.50273	1.88372	2.56977	2.856	54.808	0.236	9.45156	233.18	964.059	34.053	147.048	3.45679	0.176	4	3	3	2	4	4	2	2	3
0	43	54	1.5	135	97	76	24	76	5.17	3.8014	1.37744	1.65503	1.52573	2.27567	2.49153	0.902808	1.08475	1.49153	2.856	72.488	0.3127	8.65417	207.7	657.717	33.765	24.7939	1.57135	-0.046	2	2	2	2	2	1	1	1	2
0	38	48	1.51	121	80	66	21.0517	69	4.345	5.84432	0.66614	3.8014	1.73261	4.11171	3.37313	0.384472	2.19403	2.37313	4.284	67.184	0.2478	7.75384	163.232	535.015	26.933	7.32754	0.651872	-0.42	1	1	1	1	1	1	0	0	0
0	43	68	1.62	128	85	83	25.9107	97	5.115	4.16343	1.26454	2.40497	1.18955	2.97388	3.5	1.06304	2.02174	2.5	2.856	71.604	0.2714	8.55795	221.742	830.121	38.555	49.3169	2.26179	0.025	2	3	3	3	4	4	1	1	2
0	46	49	1.54	121	82	79	20.6612	69	4.84	5.43057	0.812916	3.05146	2.01707	3.4135	2.69231	0.403019	1.51282	1.69231	3.213	59.228	0.2478	8.06086	166.547	556.199	26.145	8.94208	0.689988	-0.398	1	1	1	1	1	1	0	0	0
0	47	64	1.54	112	76	71	26.986	81	4.62	5.43057	0.869369	3.69796	1.34471	4.08585	4.03846	0.646509	2.75	3.03846	3.213	66.3	0.2773	8.08148	218.087	654.599	37.578	19.9955	1.12201	-0.187	1	2	3	3	2	1	0	0	1
0	40	50	1.55	111	72	82	20.8117	66	5.005	4.73235	0.745173	2.66356	1.73261	2.99974	2.73134	0.430087	1.53731	1.73134	3.927	58.344	0.236	8.00737	166.647	528.486	27.287	5.96139	0.701677	-0.367	1	1	1	1	1	1	0	0	0
0	37	55	1.55	123	73	116	22.8928	76	5.72	7.86139	0.745173	5.35299	2.17223	5.68916	3.61905	0.343046	2.46429	2.61905	2.856	53.04	0.2183	8.1409	186.368	618.708	28.998	13.4131	0.612722	-0.469	1	1	1	1	1	1	0	0	0
0	45	48	1.56	125	95	71	19.7239	74	4.455	5.9219	0.756464	3.46522	2.12051	3.8014	2.79268	0.356737	1.63415	1.79268	4.284	72.488	0.2596	7.90599	155.937	585.044	24.316	12.1034	0.670719	-0.444	1	1	1	1	1	1	0	0	0
1	38	71	1.71	125	74	67	24.281	81	5.445	4.96509	1.40002	2.92216	1.39643	3.56866	3.55556	1.00257	2.09259	2.55556	5.355	90.168	0.3953	8.72225	211.785	706.503	35.148	22.4004	1.21044	0	2	3	2	2	2	2	1	1	1
1	38	62	1.68	146	91	95	21.9671	76	5.17	4.73235	0.767754	2.8963	1.47401	3.25834	3.21053	0.520861	1.96491	2.21053	4.284	91.052	0.3835	8.06966	177.267	613.294	30.133	8.4453	0.621729	-0.284	1	1	1	1	1	1	0	0	0
0	39	47	1.58	107	82	92	18.8271	64	4.015	6.10292	0.970983	3.10318	2.56012	3.5428	2.38384	0.379272	1.21212	1.38384	4.284	76.908	0.2773	8.05166	151.589	515.306	22.32	5.8259	0.631209	-0.42	1	1	1	1	1	1	0	0	0
0	35	62	1.68	131	92	104	21.9671	79	4.675	5.97362	1.15163	4.18929	1.26713	4.70649	4.71429	0.908849	3.30612	3.71429	6.069	58.344	0.1888	8.37448	183.963	661.584	31.646	24.1843	1.72519	-0.041	2	2	1	1	2	1	1	1	2
0	36	50	1.63	122	68	78	18.8189	71	5.61	3.07732	0.745173	0.801655	1.93949	1.13783	1.58667	0.384211	0.413333	0.586667	3.927	63.648	0.2832	8.12148	152.838	576.625	24.404	9.68725	0.709519	-0.42	1	1	1	1	1	1	0	0	0
1	36	78	1.79	136	72	82	24.3438	91	4.95	6.1805	1.97584	3.87898	1.39643	4.78407	4.42593	1.41492	2.77778	3.42593	4.641	114.92	0.4779	8.97145	218.399	816.402	35.831	51.3718	1.91652	0.149	3	3	3	2	4	4	2	2	2
0	37	62	1.6	107	75	80	24.2187	81	4.4	9.23196	0.779045	7.26661	1.60331	7.62865	5.75806	0.485898	4.53226	4.75806	4.998	74.256	0.2832	7.92299	191.885	641.762	31.888	17.918	0.896823	-0.31	1	1	1	1	2	1	0	0	0
1	36	69	1.67	138	92	64	24.7409	86	5.775	5.99948	1.72745	3.87898	1.31885	4.68063	4.54902	1.30981	2.94118	3.54902	4.284	92.82	0.3481	8.99125	222.452	773.248	37.089	36.2764	1.66215	0.117	3	3	3	3	3	3	2	2	2
0	36	49	1.51	117	61	92	21.4903	74	4.895	5.37885	0.89195	3.43936	1.52573	3.85312	3.52542	0.584605	2.25424	2.52542	4.284	62.764	0.2655	8.16494	175.467	604.205	29.246	14.2712	1.05161	-0.237	1	1	1	1	1	1	0	0	1
0	35	45	1.59	115	79	92	17.7999	66	4.62	5.01681	0.688721	2.71528	1.99121	3.0256	2.51948	0.345881	1.36364	1.51948	3.57	72.488	0.2537	7.84854	139.704	518.004	22.266	5.50977	0.610038	-0.456	1	1	1	1	1	1	0	0	0
0	36	46	1.54	112	71	91	19.3962	64	4.51	3.25834	0.519363	2.12051	0.905094	2.35325	3.6	0.573822	2.34286	2.6	3.927	57.46	0.2006	7.54221	146.29	482.702	29.177	3.11618	0.940968	-0.244	1	1	1	1	1	1	0	0	1
0	35	59	1.64	145	81	89	21.9363	81	4.455	4.21515	0.779045	1.75847	2.09465	2.12051	2.01235	0.371922	0.839506	1.01235	2.856	70.72	0.1357	7.93541	174.074	642.768	27.172	17.918	0.724402	-0.432	1	1	1	1	2	1	0	0	0
1	36	78	1.74	122	77	77	25.763	86	3.3	5.53401	2.2581	3.56866	0.930954	4.60305	5.94444	2.42558	3.83333	4.94444	4.998	102.544	0.4248	8.69951	224.125	748.158	41.465	47.4201	3.01093	0.386	2	4	3	3	4	3	3	3	3
0	40	62	1.58	140	99	87	24.8358	90	3.96	5.01681	1.62583	2.71528	1.55159	3.46522	3.23333	1.04785	1.75	2.23333	3.927	70.72	0.2478	8.55333	212.429	769.8	34.357	52.0266	2.1189	0.021	2	3	2	2	4	3	1	1	2
1	52	68	1.7	136	85	90	23.5294	86	5.225	3.0256	0.779045	1.11197	1.55159	1.47401	1.95	0.502094	0.716667	0.95	4.284	81.328	0.3658	8.09484	190.467	696.156	31.935	16.3599	0.65445	-0.301	1	1	1	1	1	2	0	0	0
0	42	53	1.53	107	74	79	22.6409	74	4.345	4.78407	1.44518	2.79286	1.31885	3.46522	3.62745	1.09579	2.11765	2.62745	2.856	69.836	0.3009	8.52833	193.089	631.096	32.568	23.123	1.91714	0.041	2	3	2	2	2	1	1	1	2
0	36	48	1.55	131	81	83	19.9792	74	5.83	5.50815	0.756464	4.05999	1.11197	4.39617	4.95349	0.68029	3.65116	3.95349	4.284	58.344	0.2006	8.17498	163.33	604.949	29.914	12.1034	1.27074	-0.167	1	2	1	1	1	1	0	0	1
1	37	73	1.67	133	88	74	26.1752	81	6.215	6.02534	2.17907	3.8014	1.21541	4.80993	4.95745	1.79286	3.12766	3.95745	7.497	107.848	0.4661	9.29693	243.349	753.051	41.056	34.8651	2.07786	0.253	4	4	4	3	3	3	2	2	2
0	56	55	1.56	117	98	68	22.6003	66	4.95	7.37005	0.824207	5.17197	1.81019	5.55987	4.07143	0.455315	2.85714	3.07143	4.641	66.3	0.2419	8.09712	182.997	534.41	29.435	6.59365	0.711167	-0.337	1	1	1	1	1	1	0	0	0
1	42	62	1.65	142	91	78	22.7732	81	5.225	4.60305	1.96455	2.97388	0.801655	3.8014	5.74194	2.45061	3.70968	4.74194	4.641	77.792	0.3481	9.01979	205.409	730.603	39.103	31.4328	3.06037	0.389	3	4	2	3	3	2	3	3	3
1	47	72	1.65	133	95	74	26.4463	91	4.785	5.97362	1.86293	3.43936	1.68089	4.29273	3.55385	1.1083	2.04615	2.55385	4.284	103.428	0.4248	8.87871	234.809	807.962	36.915	48.4363	1.43483	0.045	3	3	3	3	4	4	1	1	1
0	35	60	1.55	130	78	99	24.974	76	4.73	7.24076	1.59196	4.47375	2.04293	5.19783	3.5443	0.779255	2.18987	2.5443	3.927	60.996	0.354	8.70996	217.522	661.957	32.838	28.6553	1.3265	-0.108	2	2	3	2	3	1	1	1	1
1	46	56	1.62	131	97	64	21.3382	76	4.565	4.29273	1.26454	2.71528	1.00853	3.2842	4.25641	1.25384	2.69231	3.25641	5.355	110.5	0.2891	8.44419	180.184	641.759	32.781	13.9099	1.51883	0.097	2	3	1	2	1	1	2	2	2
0	35	65	1.63	110	84	90	24.4646	86	5.445	6.12878	0.779045	4.05999	1.70675	4.42203	3.59091	0.456449	2.37879	2.59091	2.856	64.532	0.236	8.13608	199.046	699.703	32.619	21.8133	0.889456	-0.337	1	1	2	2	2	2	0	0	0
0	46	58	1.57	105	76	70	23.5304	76	5.115	5.61159	0.982274	3.49108	1.68089	3.9307	3.33846	0.584377	2.07692	2.33846	3.213	53.924	0.1888	8.30536	195.428	631.207	31.619	17.6809	1.02825	-0.237	1	1	2	1	1	1	0	0	1
1	39	77	1.72	124	77	62	26.0276	84	4.785	5.24955	0.846788	3.2842	1.57745	3.6721	3.32787	0.536808	2.08197	2.32787	6.069	106.964	0.3894	8.09025	210.57	679.581	34.936	16.089	0.647203	-0.268	1	1	2	2	1	2	0	0	0
1	41	76	1.75	114	86	72	24.8163	86	4.895	7.62865	1.58067	5.40471	1.49987	6.12878	5.08621	1.05387	3.60345	4.08621	5.355	89.284	0.413	8.73713	216.824	751.393	35.193	33.1941	1.33516	0.021	3	3	3	2	3	3	1	1	1
1	47	68	1.62	128	90	66	25.9107	84	4.84	5.50815	0.914531	3.77554	1.31885	4.18929	4.17647	0.69343	2.86275	3.17647	3.57	86.632	0.3894	8.17864	211.914	687.006	36.567	17.3761	0.838113	-0.161	1	2	2	2	1	2	0	0	0
1	40	78	1.68	132	86	64	27.6361	86	3.96	4.86165	0.925821	2.97388	1.47401	3.38764	3.29825	0.628097	2.01754	2.29825	6.426	100.776	0.2773	7.99024	220.819	687.16	37.057	19.4422	0.749711	-0.201	1	2	3	3	2	2	0	0	0
1	40	74	1.65	100	77	72	27.1809	84	4.675	5.12025	1.81777	2.99974	1.29299	3.82726	3.96	1.40586	2.32	2.96	3.57	88.4	0.3363	8.83091	240.032	741.796	40.312	34.5377	1.6545	0.149	3	3	4	3	3	3	2	2	2
1	37	54	1.6	122	71	83	21.0937	76	4.62	4.80993	0.925821	2.01707	2.37911	2.43082	2.02174	0.389147	0.847826	1.02174	3.57	70.72	0.2891	8.14439	171.796	618.974	25.753	10.184	0.474121	-0.409	1	1	1	1	1	1	0	0	0
0	46	57	1.63	124	82	75	21.4536	81	5.445	5.6633	0.541944	3.0256	2.37911	3.2842	2.38043	0.227793	1.27174	1.38043	3.213	61.88	0.1888	7.77317	166.762	629.627	26.116	12.4647	0.448928	-0.638	1	1	1	1	1	1	0	0	0
1	45	64	1.64	115	81	75	23.7954	79	4.62	5.6633	1.53551	3.74968	1.21541	4.44789	4.65957	1.26336	3.08511	3.65957	4.998	101.66	0.4189	8.65032	205.838	683.376	35.34	21.4971	1.50373	0.1	2	3	2	2	2	2	2	2	2
1	56	66	1.73	127	79	75	22.0522	84	4.95	4.47375	1.94197	2.6377	0.956814	3.51694	4.67568	2.02962	2.75676	3.67568	5.355	114.92	0.3186	8.95416	197.459	752.149	35.806	36.8974	2.67241	0.307	3	4	2	2	3	3	3	3	3
1	50	68	1.7	129	90	74	23.5294	81	4.18	4.29273	0.914531	2.87044	1.00853	3.2842	4.25641	0.906793	2.84615	3.25641	5.355	100.776	0.4366	8.03204	188.989	650.595	35.01	14.6325	1.11323	-0.041	1	2	1	2	1	1	1	1	1
1	35	84	1.73	124	80	76	28.0664	91	5.06	6.74942	1.67099	4.49961	1.47401	5.27541	4.57895	1.13364	3.05263	3.57895	4.998	102.544	0.3894	8.82585	247.71	803.153	40.304	43.4459	1.41928	0.053	3	3	4	3	3	4	1	1	1
1	47	65	1.68	113	73	78	23.03	81	4.565	4.62891	1.61454	2.53426	1.34471	3.2842	3.44231	1.20066	1.88462	2.44231	4.284	91.936	0.3245	8.68854	200.097	703.772	33.417	25.8327	1.49068	0.079	2	3	2	2	2	2	2	2	2
1	44	74	1.75	136	90	95	24.1633	86	5.06	6.33566	0.858078	4.55133	1.39643	4.93923	4.53704	0.614479	3.25926	3.53704	5.355	101.66	0.3363	8.15937	197.157	701.706	33.679	18.0196	0.789723	-0.215	1	2	2	2	2	2	0	0	0
1	41	70	1.63	148	106	79	26.3465	89	6.765	6.38738	4.03071	3.59452	0.956814	5.43057	6.67568	4.21264	3.75676	5.67568	3.213	86.632	0.3658	9.99677	263.38	889.713	46.717	96.737	5.34512	0.624	4	4	4	4	4	4	3	3	3
0	46	46	1.52	119	80	67	19.91	64	3.96	4.52547	0.66614	2.43082	1.78433	2.74114	2.53623	0.373328	1.36232	1.53623	6.069	70.72	0.236	7.66106	152.531	490.308	24.984	3.99684	0.604182	-0.432	1	1	1	1	1	1	0	0	0
0	46	70	1.67	123	79	77	25.0995	81	4.345	4.78407	1.05002	2.8963	1.39643	3.38764	3.42593	0.751929	2.07407	2.42593	2.856	69.836	0.2773	8.2089	206.039	664.921	34.768	24.1504	1.36034	-0.125	1	2	2	2	2	1	1	1	1
0	43	65	1.58	130	81	82	26.0375	81	4.62	5.32713	0.790335	3.07732	1.88777	3.43936	2.82192	0.418661	1.63014	1.82192	3.213	54.808	0.2124	7.98616	207.94	646.879	33.213	18.1777	0.741763	-0.377	1	1	2	2	2	1	0	0	0
0	35	56	1.53	96	65	70	23.9224	81	4.4	4.18929	1.28712	2.53426	1.06025	3.12904	3.95122	1.21397	2.39024	2.95122	3.57	59.228	0.2242	8.42508	201.548	682.431	36.155	29.6037	2.25597	0.083	2	3	2	2	3	2	2	2	2
1	60	77	1.71	134	99	70	26.3329	91	4.95	5.94776	2.11132	3.82726	1.16369	4.78407	5.11111	1.81433	3.28889	4.11111	5.355	105.196	0.3658	9.03777	237.991	822.437	40.8	54.8944	2.35449	0.258	3	4	3	3	4	4	2	2	2
1	59	100	1.74	147	97	86	33.0295	107	4.84	7.65451	3.37586	5.30127	0.801655	6.85286	9.54839	4.21111	6.6129	8.54839	7.497	139.672	0.531	9.48463	313.272	1014.86	59.282	141.786	5.63083	0.624	4	4	4	4	4	4	3	3	3
1	59	94	1.69	131	85	76	32.912	102	4.62	6.51668	1.62583	4.29273	1.47401	5.04267	4.42105	1.103	2.91228	3.42105	4.284	86.632	0.2655	8.70748	286.581	888.163	46.747	60.1558	1.409	0.041	2	3	4	4	4	4	1	1	1
1	59	75	1.69	141	96	73	26.2596	89	6.765	7.49935	1.03873	5.63745	1.39643	6.10292	5.37037	0.743844	4.03704	4.37037	5.712	114.92	0.3658	8.64083	226.904	769.033	38.334	24.9294	0.945543	-0.131	2	2	3	3	2	3	1	1	1
1	59	79	1.68	130	90	68	27.9904	86	4.675	6.54254	1.00485	5.22369	0.853375	5.68916	7.66667	1.17751	6.12121	6.66667	4.284	114.92	0.3658	8.23814	230.589	708.48	44.483	21.102	1.39536	0.072	1	3	3	4	2	2	2	2	1
1	55	88	1.78	170	97	79	27.7743	86	6.16	7.00802	1.44518	4.60305	1.73261	5.27541	4.04478	0.834109	2.65672	3.04478	3.927	94.588	0.4602	8.87738	246.563	763.455	38.727	30.3489	0.992797	-0.081	3	2	4	3	3	3	1	1	1
1	54	75	1.71	114	90	92	25.6489	89	5.225	5.68916	1.12905	3.31006	1.86191	3.82726	3.05556	0.606394	1.77778	2.05556	4.641	111.384	0.3422	8.4659	217.141	753.465	34.006	27.0972	0.780891	-0.215	2	2	3	2	2	3	0	0	0
1	54	82	1.7	143	102	86	28.3737	97	5.72	8.19757	2.40488	5.58573	1.49987	6.6977	5.46552	1.60339	3.72414	4.46552	6.426	86.632	0.3717	9.31254	264.231	903.316	42.219	76.9561	2.12646	0.204	4	3	4	4	4	4	2	2	2
1	51	68	1.68	125	91	68	24.093	81	4.84	6.54254	2.07745	4.29273	1.29299	5.24955	5.06	1.6067	3.32	4.06	7.854	114.036	0.4425	8.99913	216.816	728.929	36.246	33.2392	1.94789	0.207	3	3	3	2	3	2	2	2	2
1	52	67	1.67	129	96	61	24.0238	84	5.775	4.86165	0.609687	3.12904	1.44815	3.4135	3.35714	0.421011	2.16071	2.35714	4.641	114.92	0.3127	7.9498	190.984	667.783	33.273	11.5841	0.530129	-0.377	1	1	1	2	1	1	0	0	0
1	51	53	1.62	110	80	88	20.1951	74	4.675	4.24101	1.95326	2.06879	1.26713	2.97388	3.34694	1.54148	1.63265	2.34694	2.856	71.604	0.3717	8.9028	179.793	658.807	30.3	17.5793	1.86844	0.188	3	3	1	1	1	1	2	2	2
1	48	70	1.62	144	99	73	26.6728	91	4.675	6.23222	0.948402	4.29273	1.49987	4.73235	4.15517	0.632323	2.86207	3.15517	6.783	103.428	0.3304	8.18032	218.192	744.409	36.371	24.6585	0.814738	-0.201	1	2	3	2	2	3	0	0	0
1	48	89	1.9	153	100	76	24.6537	86	4.73	5.81846	0.89195	3.62038	1.78433	4.03413	3.26087	0.49988	2.02899	2.26087	7.497	101.66	0.4602	8.13065	200.451	699.236	32.168	18.7309	0.635555	-0.301	1	1	2	2	2	2	0	0	0
1	49	84	1.71	115	56	69	28.7268	91	4.84	7.52521	1.36615	5.84432	1.06025	6.46496	7.09756	1.28851	5.5122	6.09756	4.998	84.864	0.4012	8.57998	246.475	780.778	44.049	35.5199	1.5918	0.111	2	3	4	4	3	3	2	2	2
1	49	68	1.67	97	66	56	24.3824	84	4.73	5.55987	1.06131	4.11171	0.956814	4.60305	5.81081	1.10921	4.2973	4.81081	5.355	101.66	0.3245	8.30449	202.483	697.578	37.698	20.1648	1.38569	0.045	1	3	2	3	2	2	1	1	1
1	48	73	1.7	112	79	72	25.2595	97	4.895	7.78381	3.01456	5.48229	0.930954	6.85286	8.36111	3.23814	5.88889	7.36111	5.355	96.356	0.3953	9.38274	237.003	910.126	42.985	96.4661	4.58295	0.511	4	4	3	4	4	4	3	3	3
1	51	69	1.69	124	82	78	24.1588	86	5.225	5.40471	1.01615	3.77554	1.16369	4.24101	4.64444	0.873208	3.24444	3.64444	6.069	103.428	0.3363	8.36054	201.981	719.006	35.763	21.3391	1.12235	-0.06	2	2	2	2	2	2	1	1	1
0	43	64	1.56	121	85	97	26.2985	79	5.17	4.86165	1.45648	2.99974	1.18955	3.6721	4.08696	1.22439	2.52174	3.08696	3.213	60.112	0.3127	8.70996	229.059	688.087	39.559	30.586	2.10365	0.086	2	3	3	3	3	2	2	2	2
1	49	61	1.65	142	96	75	22.4059	81	6.16	8.32687	1.20808	5.6633	2.12051	6.20636	3.92683	0.569715	2.67073	2.92683	5.712	98.124	0.4248	8.69818	194.89	704.553	29.506	19.3293	0.717475	-0.244	2	1	2	1	2	2	0	0	0
1	51	92	1.7	117	80	88	31.8339	97	5.28	6.3098	2.04358	4.62891	0.775795	5.53401	8.13333	2.63418	5.96667	7.13333	4.641	92.82	0.2773	9.0697	288.724	879.761	55.417	65.3946	3.26518	0.42	3	4	4	4	4	4	3	3	3
1	52	84	1.69	139	97	91	29.4107	91	5.555	3.77554	0.767754	2.24981	1.16369	2.61184	3.24444	0.659757	1.93333	2.24444	4.998	114.92	0.4897	8.14148	239.447	740.875	43.253	19.9616	0.804013	-0.18	1	2	4	4	2	3	0	0	0
1	50	73	1.75	136	84	88	23.8367	84	4.015	5.17197	1.45648	3.20662	1.29299	3.87898	4	1.12644	2.48	3	7.14	83.98	0.3009	8.45712	201.59	710.398	34.229	27.673	1.42429	0.053	2	3	2	2	2	2	1	1	1
1	50	70	1.72	113	74	55	23.6614	81	5.115	5.7926	1.62583	3.98242	1.06025	4.73235	5.46341	1.53344	3.7561	4.46341	3.57	93.704	0.3304	8.80927	208.44	713.551	36.947	26.0133	1.87699	0.185	3	3	2	3	2	2	2	2	2
1	50	90	1.62	126	99	74	34.2936	102	5.115	5.24955	0.948402	3.49108	1.31885	3.9307	3.98039	0.719112	2.64706	2.98039	3.927	75.14	0.2596	8.27027	283.617	843.567	48.825	35.0909	0.895702	-0.143	1	2	4	4	3	4	1	1	0
1	44	84	1.85	142	99	46	24.5435	94	5.5	6.46496	3.21779	3.59452	1.39643	5.06853	4.62963	2.3043	2.57407	3.62963	3.57	82.212	0.3481	9.56451	234.746	899.064	38.045	93.316	3.20999	0.362	4	4	3	3	4	4	3	3	3
1	46	76	1.8	100	80	58	23.4568	84	4.84	6.38738	0.993564	4.44789	1.47401	4.91337	4.33333	0.674055	3.01754	3.33333	6.069	99.892	0.3658	8.26153	193.789	693.968	32.355	18.8777	0.859557	-0.174	1	2	2	2	2	2	0	0	0
1	45	72	1.69	100	64	91	25.2092	99	5.885	8.55961	1.1855	6.74942	1.26713	7.29247	6.7551	0.93558	5.32653	5.7551	5.355	114.92	0.3245	8.63364	217.647	854.731	37.345	40.3071	1.3529	-0.027	2	2	3	3	3	4	1	1	1
1	50	63	1.67	124	84	63	22.5896	84	4.125	6.36152	2.64198	4.34445	0.801655	5.55987	7.93548	3.29565	5.41935	6.93548	4.284	98.124	0.3599	9.07966	205.105	762.692	39.145	50.1976	4.28604	0.519	3	4	2	3	4	3	3	3	3
1	47	66	1.65	138	82	60	24.2424	81	4.345	4.78407	0.654849	3.25834	1.21541	3.56866	3.93617	0.538788	2.68085	2.93617	4.998	108.732	0.354	7.73674	187.557	626.676	33.842	10.4776	0.651048	-0.268	1	1	1	2	1	1	0	0	0
1	50	70	1.67	110	80	76	25.0995	86	4.565	5.45643	1.67099	3.46522	1.21541	4.24101	4.48936	1.37484	2.85106	3.48936	5.712	106.964	0.3068	8.72291	218.941	750.17	37.482	35.0909	1.73113	0.137	2	3	3	3	3	3	2	2	2
1	47	105	1.7	135	100	93	36.3322	107	5.885	7.70623	1.05002	5.48229	1.73261	5.97362	4.44776	0.606032	3.16418	3.44776	5.712	83.096	0.2537	8.51228	309.27	910.814	49.482	44.1007	0.763752	-0.215	2	2	4	4	3	4	0	0	0
1	44	53	1.62	118	78	89	20.1951	81	4.895	5.30127	1.05002	3.31006	1.49987	3.8014	3.53448	0.700072	2.2069	2.53448	5.712	99.008	0.3009	8.32809	168.187	674.575	27.87	16.8003	0.928834	-0.155	1	2	1	1	1	1	0	0	1
1	45	72	1.64	118	84	51	26.7698	89	4.345	6.4391	1.4226	4.60305	1.18955	5.24955	5.41304	1.19591	3.86957	4.41304	4.284	88.4	0.4012	8.51258	227.88	757.62	39.498	34.1425	1.504	0.079	2	3	3	3	3	3	2	2	2
1	43	64	1.7	100	60	54	22.1453	76	3.905	5.09439	1.46777	3.43936	0.982674	4.11171	5.18421	1.49364	3.5	4.18421	2.856	112.268	0.2655	8.43707	186.842	641.217	34.135	16.1454	1.77555	0.173	2	3	1	2	1	1	2	2	2
1	43	62	1.7	128	90	94	21.4533	81	5.5	7.31833	1.51293	5.48229	1.13783	6.1805	6.43182	1.32966	4.81818	5.43182	4.998	93.704	0.4543	8.80986	189.001	713.599	32.939	24.2068	1.712	0.124	3	3	1	2	2	2	2	2	2
1	44	77	1.65	112	77	86	28.2828	89	9.24	4.57719	3.13876	2.40497	0.775795	3.8014	5.9	4.04586	3.1	4.9	4.641	70.72	0.2773	10.0584	284.481	895.201	53.38	75.3302	4.93225	0.607	4	4	4	4	4	4	3	3	3
1	43	59	1.6	136	93	94	23.0469	81	5.225	7.99069	1.0726	5.58573	1.91363	6.07706	4.17568	0.560505	2.91892	3.17568	4.641	97.24	0.3422	8.41461	193.93	681.583	30.271	17.1616	0.695629	-0.252	2	1	2	1	1	2	0	0	0
1	41	63	1.74	125	77	73	20.8086	71	5.005	7.2149	0.643559	4.52547	2.40497	4.80993	3	0.267596	1.88172	2	6.426	80.444	0.3068	7.86076	163.571	558.114	25.143	3.86135	0.306652	-0.569	1	1	1	1	1	1	0	0	0
1	37	84	1.7	129	90	88	29.0657	97	4.565	6.36152	0.993564	4.70649	1.18955	5.17197	5.34783	0.835242	3.95652	4.34783	4.641	99.892	0.3009	8.20303	238.427	795.694	42.044	31.7941	1.09244	-0.076	1	2	3	4	3	4	1	1	1
1	36	62	1.72	135	95	80	20.9573	81	5.06	4.49961	1.40002	2.6377	1.21541	3.2842	3.70213	1.15189	2.17021	2.70213	3.927	85.748	0.3186	8.64892	181.258	700.563	31.194	22.4004	1.5006	0.061	2	3	1	1	2	2	2	2	2
1	36	67	1.73	112	97	53	22.3863	81	3.96	6.90458	1.75003	4.70649	1.39643	5.50815	4.94444	1.25321	3.37037	3.94444	4.284	75.14	0.3835	8.62694	193.125	698.782	31.996	28.0005	1.57896	0.097	2	3	2	1	2	2	2	2	2
1	40	70	1.73	124	79	76	23.3887	81	5.06	5.71502	1.08389	4.21515	1.00853	4.70649	5.66667	1.07472	4.17949	4.66667	5.355	89.284	0.3658	8.39299	196.301	679.832	35.975	17.3422	1.32356	0.029	2	3	2	2	1	2	1	1	1
1	35	97	1.75	121	95	76	31.6735	86	4.73	5.89604	4.41459	2.97388	0.905094	4.99095	6.51429	4.87749	3.28571	5.51429	3.927	84.864	0.5133	9.72991	308.18	836.772	56.415	92.7063	5.37654	0.688	4	4	4	4	4	4	3	3	3
0	38	60	1.61	145	89	89	23.1473	79	4.4	5.71502	2.23552	3.10318	1.57745	4.13757	3.62295	1.41717	1.96721	2.62295	4.284	69.836	0.3363	8.97715	207.796	709.195	33.116	46.9459	2.61541	0.152	3	3	2	2	4	2	2	2	3
1	60	73	1.72	135	93	68	24.6755	86	4.345	5.40471	1.63712	3.20662	1.44815	3.95656	3.73214	1.13049	2.21429	2.73214	4.284	100.776	0.4602	8.65303	213.518	744.161	35.032	34.3796	1.43664	0.053	2	3	2	2	3	3	1	1	1
1	58	95	1.77	112	90	66	30.3233	97	4.73	6.59426	1.52422	4.78407	1.11197	5.48229	5.93023	1.37073	4.30233	4.93023	7.497	105.196	0.3481	8.66647	262.796	840.648	46.166	48.775	1.74899	0.137	2	3	4	4	4	4	2	2	2
1	56	96	1.71	104	82	80	32.8306	104	6.875	5.24955	1.5468	3.49108	1.06025	4.18929	4.95122	1.4589	3.29268	3.95122	4.641	93.704	0.4012	9.05515	297.286	941.735	52.676	60.3252	1.90304	0.164	3	3	4	4	4	4	2	2	2
1	57	63	1.72	115	86	81	21.2953	79	4.84	6.25808	1.35486	4.11171	1.52573	4.73235	4.10169	0.888008	2.69492	3.10169	4.284	114.92	0.236	8.57168	182.536	677.163	29.725	18.968	1.11928	-0.051	2	2	1	1	2	1	1	1	1
1	56	80	1.72	135	103	98	27.0416	86	5.28	6.07706	1.91939	3.5428	1.65503	4.42203	3.67188	1.15973	2.14062	2.67188	3.927	96.356	0.2596	9.007	243.564	774.602	38.306	40.3071	1.40137	0.064	3	3	4	3	3	3	2	2	1
1	44	64	1.64	137	91	92	23.7954	81	5.555	6.15464	2.72101	3.85312	1.06025	5.09439	5.80488	2.56638	3.63415	4.80488	4.641	79.56	0.3658	9.40677	223.837	761.948	39.053	43.5362	3.13198	0.41	4	4	3	3	3	3	3	3	3
1	41	77	1.75	121	74	73	25.1429	86	4.345	3.72382	1.10647	2.09465	1.11197	2.61184	3.34884	0.995051	1.88372	2.34884	3.57	91.052	0.4012	8.26127	207.712	710.469	37.064	23.2359	1.25174	0	1	3	2	3	2	2	1	1	1
1	50	81	1.71	138	100	94	27.7008	91	5.17	8.68891	1.27583	6.59426	1.49987	7.18904	5.7931	0.850625	4.39655	4.7931	5.712	109.616	0.4838	8.57754	237.605	780.556	38.933	33.1715	1.07293	-0.071	2	2	3	3	3	3	1	1	1
1	50	72	1.65	130	79	80	26.4463	81	5.115	5.48229	1.93068	3.6721	0.930954	4.55133	5.88889	2.07387	3.94444	4.88889	5.355	90.168	0.2891	8.98112	237.517	727.47	43.384	30.8908	2.38983	0.316	3	4	3	4	3	2	3	3	2
1	36	80	1.7	112	85	56	27.6817	86	4.4	5.6633	1.85164	3.46522	1.34471	4.31859	4.21154	1.37698	2.57692	3.21154	3.57	93.704	0.4307	8.78875	243.287	755.832	40.496	38.8845	1.64206	0.14	3	3	4	3	3	3	2	2	2
1	39	60	1.7	142	79	64	20.7612	71	4.675	5.58573	0.858078	3.77554	1.42229	4.16343	3.92727	0.603307	2.65455	2.92727	5.712	95.472	0.4425	8.08024	167.756	573.697	28.52	5.14847	0.692141	-0.222	1	2	1	1	1	1	0	0	0
1	40	69	1.63	129	91	78	25.9701	84	4.84	7.91311	3.0936	5.35299	1.13783	6.77528	6.95455	2.71885	4.70455	5.95455	5.712	114.92	0.4484	9.39732	244.049	789.375	41.926	58.7784	3.28199	0.435	4	4	4	4	4	3	3	3	3
1	50	73	1.7	113	70	88	25.2595	84	5.28	8.09413	2.9694	5.55987	1.16369	6.93044	6.95556	2.55171	4.77778	5.95556	3.57	106.964	0.3422	9.44336	238.535	793.242	40.677	56.4187	3.12743	0.407	4	4	3	3	4	3	3	3	3
1	37	71	1.73	133	90	66	23.7228	81	5.005	5.35299	1.00485	3.6721	1.21541	4.13757	4.40426	0.82676	3.02128	3.40426	4.284	83.98	0.3127	8.30635	197.05	672.814	34.514	16.0777	1.0106	-0.081	1	2	2	2	1	1	1	1	1
1	42	84	1.73	132	80	80	28.0664	86	4.95	4.65477	1.46777	2.94802	1.03439	3.62038	4.5	1.41896	2.85	3.5	3.927	114.92	0.4956	8.6742	243.454	745.981	43.698	30.8231	1.67888	0.152	2	3	4	4	3	3	2	2	2
1	42	72	1.65	119	81	89	26.4463	86	11.495	4.37031	1.4226	2.43082	1.29299	3.07732	3.38	1.10024	1.88	2.38	3.927	80.444	0.3717	9.48547	250.855	815.75	42.589	29.8747	1.34613	0.041	4	3	4	4	3	4	1	1	1
1	43	82	1.64	134	93	76	30.4878	86	5.17	5.63745	1.08389	3.72382	1.42229	4.21515	3.96364	0.762072	2.61818	2.96364	5.355	77.792	0.2655	8.4145	256.54	723.647	42.981	22.7617	0.85935	-0.119	2	2	4	4	2	2	1	1	0
1	54	61	1.66	144	80	63	22.1367	81	5.28	6.74942	1.61454	4.93923	1.06025	5.68916	6.36585	1.52279	4.65854	5.36585	5.712	97.24	0.2714	8.83405	195.557	715.558	34.663	25.8327	1.92967	0.182	3	3	2	2	2	2	2	2	2
0	58	61	1.67	126	79	66	21.8724	79	5.17	4.73235	0.801626	2.56012	1.81019	2.92216	2.61429	0.442841	1.41429	1.61429	5.712	77.792	0.3304	8.11283	177.447	640.913	28.605	16.8341	0.842541	-0.357	1	1	1	1	1	1	0	0	0
1	44	67	1.66	126	88	84	24.3141	86	5.115	6.827	2.4952	4.65477	1.03439	5.7926	6.6	2.41224	4.5	5.6	3.927	70.72	0.4484	9.23762	224.605	794.435	39.599	52.3992	3.08989	0.382	4	4	3	3	4	3	3	3	3
1	38	60	1.68	124	75	65	21.2585	74	5.115	4.21515	0.869369	2.30153	1.52573	2.68942	2.76271	0.569805	1.50847	1.76271	6.069	90.168	0.354	8.18326	173.964	605.561	29.053	7.82432	0.67333	-0.244	1	1	1	1	1	1	0	0	0
1	47	119	1.75	162	118	83	38.8571	102	5.72	6.67184	1.53551	4.39617	1.57745	5.09439	4.22951	0.973412	2.78689	3.22951	6.783	92.82	0.4484	8.8639	344.426	904.118	55.211	56.8138	1.12017	-0.013	3	3	4	4	4	4	1	1	1
0	45	62	1.55	137	106	92	25.8065	84	5.28	5.01681	1.08389	3.4135	1.11197	3.90484	4.51163	0.974743	3.06977	3.51163	3.57	74.256	0.2419	8.43555	217.692	708.586	38.86	28.1811	1.80013	-0.013	2	3	3	3	2	2	1	1	2
1	36	78	1.73	123	85	74	26.0617	89	4.84	6.38738	0.858078	4.73235	1.26713	5.12025	5.04082	0.677181	3.73469	4.04082	4.998	88.4	0.2596	8.11492	211.489	722.228	37.026	20.5939	0.864417	-0.167	1	2	2	3	2	2	0	0	0
0	48	59	1.58	125	95	92	23.634	79	5.17	5.97362	0.914531	4.13757	1.42229	4.55133	4.2	0.642998	2.90909	3.2	2.856	71.604	0.3186	8.2446	194.853	651.323	32.99	19.2051	1.17322	-0.194	1	2	2	2	2	1	0	0	1
1	35	68	1.67	123	87	66	24.3824	84	4.895	6.93044	1.46777	4.73235	1.52573	5.40471	4.54237	0.962008	3.10169	3.54237	7.14	97.24	0.3953	8.66302	211.225	727.694	34.261	27.8875	1.20179	-0.018	2	1	2	2	2	2	1	1	1
1	40	75	1.65	130	87	58	27.5482	91	5.17	5.06853	0.982274	3.23248	1.39643	3.6721	3.62963	0.703417	2.31481	2.62963	7.14	114.036	0.3363	8.31606	229.092	756.761	38.792	25.5391	0.890034	-0.155	1	2	3	3	2	3	0	0	0
1	55	59	1.67	136	87	63	21.1553	81	4.895	4.57719	3.42102	1.55159	1.44815	3.12904	3.16071	2.36234	1.07143	2.16071	3.927	100.776	0.4012	9.50922	201.17	770.247	32.465	54.7364	3.06307	0.373	4	4	2	2	4	3	3	3	3
1	52	63	1.65	120	79	91	23.1405	81	5.72	5.19783	0.959693	3.4135	1.34471	3.85312	3.86538	0.713679	2.53846	2.86538	4.284	101.66	0.354	8.39389	194.239	679.905	33.265	15.3551	0.883856	-0.149	2	2	2	2	1	2	1	1	0
1	53	81	1.66	140	87	79	29.3947	107	4.84	5.37885	1.8968	3.51694	0.982674	4.39617	5.47368	1.93025	3.57895	4.47368	4.284	95.472	0.3304	8.90815	261.852	953.172	47.19	79.6658	2.76677	0.286	3	4	4	4	4	4	2	2	3
1	50	79	1.68	121	91	83	27.9904	86	6.93	5.81846	1.84035	3.8014	1.16369	4.65477	5	1.58148	3.26667	4	4.641	78.676	0.3481	9.23688	258.544	794.372	44.325	38.6474	1.87406	0.199	4	3	4	4	3	3	2	2	2
1	50	83	1.71	146	97	60	28.3848	94	6.27	6.10292	2.15649	3.8014	1.31885	4.78407	4.62745	1.63512	2.88235	3.62745	6.069	111.384	0.472	9.29532	263.846	873.761	43.581	62.5381	2.101	0.215	4	3	4	4	4	4	2	2	2
1	41	77	1.73	134	90	76	25.7276	89	4.95	4.80993	0.89195	3.12904	1.26713	3.5428	3.79592	0.703912	2.46939	2.79592	7.854	109.616	0.3953	8.17611	210.351	727.674	36.738	21.4068	0.904949	-0.155	1	2	2	3	2	2	0	0	0
1	46	63	1.62	135	93	60	24.0055	89	5.61	4.55133	0.914531	2.17223	1.96535	2.58598	2.31579	0.465328	1.10526	1.31579	4.641	100.776	0.3599	8.32627	199.876	741.038	31.338	21.9487	0.621061	-0.328	1	1	2	1	2	3	0	0	0
1	45	74	1.75	123	75	68	24.1633	81	5.445	6.07706	1.51293	3.9307	1.44815	4.62891	4.19643	1.04473	2.71429	3.19643	5.355	94.588	0.3658	8.79981	212.632	712.785	34.842	24.2068	1.26462	0.017	3	3	2	2	2	2	1	1	1
0	39	54	1.59	100	74	87	21.3599	71	3.96	7.26661	2.08874	3.9307	2.37911	4.88751	3.05435	0.877953	1.65217	2.05435	3.927	77.792	0.4248	8.80387	188.05	625.075	27.379	27.1537	1.52012	-0.056	3	2	1	1	2	1	1	1	2
0	41	62	1.6	111	74	82	24.2187	81	5.17	4.18929	0.722592	2.56012	1.29299	2.8963	3.24	0.558853	1.98	2.24	7.497	68.068	0.2773	8.00903	193.969	648.731	34.234	16.6196	1.03148	-0.252	1	1	2	2	1	1	0	0	1
0	39	58	1.65	113	72	60	21.3039	71	4.675	6.12878	1.35486	3.87898	1.62917	4.49961	3.7619	0.831626	2.38095	2.7619	2.856	74.256	0.2478	8.537	181.872	606.127	29.149	17.6132	1.44189	-0.081	2	2	1	1	1	1	1	1	1
0	41	54	1.63	121	84	83	20.3244	71	5.06	6.54254	0.733883	4.73235	1.47401	5.06853	4.4386	0.497882	3.21053	3.4386	5.355	70.72	0.2714	8.00303	162.657	568.215	27.73	9.54048	0.884547	-0.301	1	1	1	1	1	1	0	0	0
0	45	46	1.53	108	67	78	19.6506	69	4.95	5.17197	1.02744	2.94802	1.75847	3.4135	2.94118	0.584279	1.67647	1.94118	5.355	59.228	0.3245	8.31752	163.444	573.909	26.089	11.3018	1.02623	-0.237	1	1	1	1	1	1	0	0	1
0	42	53	1.52	118	67	88	22.9398	76	4.84	5.32713	0.496782	3.31006	1.78433	3.5428	2.98551	0.278414	1.85507	1.98551	6.069	70.72	0.3186	7.56838	173.617	575.197	29.222	8.94208	0.49673	-0.553	1	1	1	1	1	1	0	0	0
0	35	75	1.6	113	67	80	29.2969	86	4.62	6.28394	0.496782	4.13757	1.91363	4.37031	3.28378	0.259602	2.16216	2.28378	3.927	61.88	0.2773	7.52186	220.367	646.88	36.465	13.9099	0.455626	-0.585	1	1	3	2	1	1	0	0	0
0	48	101	1.62	180	128	82	38.485	97	9.735	5.14611	1.45648	3.20662	1.26713	3.87898	4.06122	1.14943	2.53061	3.06122	3.57	58.344	0.3245	9.34281	359.558	906.253	61.104	56.8025	1.91393	0.061	4	3	4	4	4	4	2	2	2
0	41	58	1.56	132	83	89	23.833	79	4.95	7.37005	1.14034	4.99095	1.86191	5.50815	3.95833	0.612458	2.68056	2.95833	3.57	64.532	0.1829	8.42178	200.716	665.321	31.417	23.9472	1.11235	-0.215	2	2	2	1	2	1	0	0	1
0	37	62	1.55	116	78	75	25.8065	81	4.785	6.85286	0.982274	4.91337	1.49987	5.35299	4.56897	0.654906	3.27586	3.56897	4.641	71.604	0.3009	8.23867	212.611	667.332	35.371	22.5923	1.16627	-0.187	1	2	2	2	2	1	0	0	1
1	37	95	1.78	150	97	77	29.9836	97	4.895	6.4391	2.41617	3.9307	1.39643	5.04267	4.61111	1.73024	2.81481	3.61111	4.641	74.256	0.4071	9.16147	274.694	888.662	44.878	77.3174	2.22239	0.238	3	4	4	4	4	4	2	2	2
0	56	59	1.59	120	82	71	23.3377	79	5.17	7.0856	1.12905	5.01681	1.55159	5.53401	4.56667	0.727673	3.23333	3.56667	4.998	67.184	0.3422	8.45532	197.328	667.97	32.282	23.7101	1.33694	-0.137	2	2	2	2	2	1	1	1	1
0	45	68	1.62	134	76	92	25.9107	86	4.895	6.46496	0.993564	4.62891	1.37057	5.09439	4.71698	0.724927	3.37736	3.71698	3.213	68.068	0.2301	8.27283	214.355	711.463	36.438	27.8198	1.36749	-0.143	1	2	2	2	2	2	1	1	1
0	39	61	1.68	127	75	97	21.6128	76	5.06	6.80114	0.846788	4.80993	1.60331	5.19783	4.24194	0.52815	3	3.24194	2.856	59.228	0.3422	8.14613	176.061	619.106	29.096	15.2422	0.972814	-0.276	1	1	1	1	1	1	0	0	1
0	38	78	1.65	110	81	82	28.6501	86	4.95	5.30127	0.767754	3.1549	1.78433	3.51694	2.97101	0.430276	1.76812	1.97101	3.213	67.184	0.2773	8.02617	229.951	690.251	37.307	21.4971	0.765349	-0.367	1	1	3	3	2	2	0	0	0
0	44	65	1.68	133	65	66	23.03	81	4.895	4.88751	0.688721	2.79286	1.78433	3.10318	2.73913	0.385983	1.56522	1.73913	3.213	79.56	0.3363	7.90636	182.084	640.415	29.787	15.8406	0.73239	-0.409	1	1	1	1	1	1	0	0	0
0	41	68	1.53	124	82	72	29.0487	81	4.675	6.02534	0.90324	4.11171	1.49987	4.52547	4.01724	0.602212	2.74138	3.01724	3.213	70.72	0.354	8.13153	236.21	658.654	39.503	20.7745	1.00059	-0.222	1	2	3	3	2	1	0	0	1
0	41	49	1.56	92	64	69	20.1348	69	4.125	4.86165	0.45162	3.2842	1.37057	3.49108	3.54717	0.329512	2.39623	2.54717	3.213	72.488	0.2242	7.31322	147.25	504.612	26.603	4.96782	0.571661	-0.481	1	1	1	1	1	1	0	0	0
0	44	74	1.62	155	91	98	28.1969	86	5.005	6.46496	3.54522	2.92216	1.91363	4.55133	3.37838	1.85262	1.52703	2.37838	3.57	66.3	0.2714	9.56711	269.763	822.771	40.665	99.2661	3.32673	0.267	4	4	4	3	4	4	2	2	3
0	36	43	1.54	87	65	78	18.1312	69	4.785	4.73235	0.722592	2.14637	2.24981	2.48254	2.10345	0.32118	0.954023	1.10345	3.927	69.836	0.2183	7.93164	143.81	547.283	22.215	7.94852	0.586987	-0.495	1	1	1	1	1	1	0	0	0
1	60	59	1.7	140	80	82	20.4152	79	6.27	4.91337	1.27583	2.37911	1.93949	2.97388	2.53333	0.657816	1.22667	1.53333	3.57	85.748	0.2596	8.77044	179.05	692.865	27.582	17.8616	0.846708	-0.18	3	2	1	1	2	2	0	0	0
1	60	69	1.78	123	83	73	21.7776	61	5.225	6.64598	1.85164	4.60305	1.18955	5.45643	5.58696	1.55659	3.86957	4.58696	4.998	89.284	0.3068	8.9606	195.14	546.596	33.389	-7.40657	1.49791	0.193	3	3	2	2	1	1	2	2	2
1	60	69	1.69	147	92	60	24.1588	86	5.225	4.39617	0.632268	2.48254	1.62917	2.767	2.69841	0.388092	1.52381	1.69841	5.712	106.08	0.413	7.88608	190.518	678.203	32.103	13.2776	0.498822	-0.409	1	1	1	1	1	1	0	0	0
1	58	84	1.76	149	107	79	27.1178	89	6.16	4.49961	2.26939	2.40497	1.06025	3.43936	4.2439	2.14042	2.26829	3.2439	5.712	83.98	0.4484	9.32866	252.972	830.25	44.198	54.4654	2.6724	0.33	4	4	4	4	4	4	3	3	3
1	60	87	1.63	118	82	69	32.7449	102	6.985	3.98242	1.76132	2.14637	1.03439	2.94802	3.85	1.70275	2.075	2.85	6.069	114.92	0.2419	9.2009	301.283	938.491	53.395	65.1688	2.18189	0.23	4	4	4	4	4	4	2	2	2
1	60	72	1.65	148	93	89	26.4463	86	16.28	5.01681	1.59196	3.38764	0.905094	4.11171	5.54286	1.75889	3.74286	4.54286	7.14	89.284	0.3127	9.94597	263.034	855.354	49.079	33.4312	2.15198	0.246	4	4	4	4	3	4	2	2	2
1	60	72	1.72	145	93	103	24.3375	89	5.39	3.87898	2.39359	1.49987	1.29299	2.58598	3	1.8512	1.16	2	4.284	70.72	0.2891	9.24841	225.083	823.108	37.401	57.4461	2.4527	0.267	4	4	3	3	4	4	2	2	2
1	45	69	1.71	112	74	70	23.597	81	5.28	7.03388	1.46777	5.45643	0.905094	6.12878	7.77143	1.62167	6.02857	6.77143	4.641	106.964	0.1888	8.73874	206.208	707.838	38.331	23.4842	1.98785	0.21	3	3	2	3	2	2	2	2	2
1	35	84	1.8	145	91	106	25.9259	91	4.015	6.12878	2.1452	3.69796	1.44815	4.68063	4.23214	1.48133	2.55357	3.23214	4.641	93.704	0.472	8.84434	229.298	804.835	37.472	55.7751	1.93898	0.17	3	3	3	3	4	4	2	2	2
1	57	86	1.63	158	100	82	32.3685	102	5.28	6.02534	1.61454	3.95656	1.31885	4.70649	4.56863	1.2242	3	3.56863	3.213	76.908	0.2832	8.83405	285.945	901.073	47.867	59.7381	1.57972	0.086	3	3	4	4	4	4	2	2	2
0	56	62	1.64	137	72	109	23.0518	81	4.73	5.40471	1.06131	3.0256	1.88777	3.51694	2.86301	0.562202	1.60274	1.86301	4.284	63.648	0.2773	8.30449	191.433	672.664	29.997	24.4101	1.06621	-0.252	1	1	1	1	2	1	0	0	1
0	56	82	1.52	141	89	90	35.4917	94	5.555	6.0512	1.20808	3.62038	1.88777	4.16343	3.20548	0.639954	1.91781	2.20548	5.712	70.72	0.4484	8.5948	305.044	807.911	47.425	43.491	1.089	-0.194	2	2	4	4	3	4	0	0	1
0	56	57	1.53	136	82	74	24.3496	81	5.115	7.34419	1.71616	4.86165	1.70675	5.63745	4.30303	1.00551	2.84848	3.30303	4.641	50.388	0.3186	8.86333	215.819	717.93	33.843	39.4716	1.85032	0.004	3	3	3	2	3	2	1	1	2
1	55	92	1.72	152	103	79	31.0979	104	5.72	5.99948	1.15163	3.64624	1.83605	4.16343	3.26761	0.627234	1.98592	2.26761	6.783	99.008	0.2832	8.57622	266.702	891.927	41.853	44.9136	0.845343	-0.201	2	2	4	4	3	4	0	0	0
1	54	85	1.66	140	90	63	30.8463	97	6.435	6.87872	1.85164	4.86165	1.16369	5.71502	5.91111	1.59118	4.17778	4.91111	5.355	93.704	0.4071	9.16889	282.826	889.383	48.515	59.2526	2.00983	0.201	3	3	4	4	4	4	2	2	2
1	54	79	1.69	140	95	82	27.6601	94	5.39	6.51668	1.47906	4.65477	1.18955	5.32713	5.47826	1.24337	3.91304	4.47826	5.355	89.284	0.354	8.76702	242.497	824.1	41.83	42.8926	1.62138	0.093	3	3	4	4	3	4	2	2	2
1	54	72	1.7	141	84	83	24.9135	84	6.49	4.57719	1.84035	2.27567	1.44815	3.12904	3.16071	1.27083	1.57143	2.16071	3.57	96.356	0.3717	9.17129	228.489	770.388	37.061	34.9667	1.56927	0.104	3	3	3	3	3	3	2	2	2
1	55	66	1.61	126	84	73	25.462	84	5.115	4.91337	1.52422	2.6377	1.57745	3.33592	3.11475	0.966254	1.67213	2.11475	3.213	78.676	0.3245	8.74473	222.658	734.557	35.744	28.9601	1.17911	-0.013	3	3	3	2	3	3	1	1	1
1	54	66	1.68	130	88	60	23.3844	81	5.5	7.03388	1.10647	5.06853	1.44815	5.58573	4.85714	0.764057	3.5	3.85714	4.998	106.08	0.3776	8.49699	198.697	688.256	33.09	17.7035	0.94106	-0.119	2	2	2	2	1	2	1	1	1
1	54	65	1.65	152	107	97	23.8751	86	5.72	5.14611	1.14034	3.51694	1.11197	4.03413	4.62791	1.02551	3.16279	3.62791	4.641	104.312	0.4248	8.56636	204.523	736.707	36.401	23.9472	1.32642	0.013	2	3	2	2	2	3	1	1	1
0	54	58	1.53	122	76	78	24.7768	76	4.95	6.02534	1.68229	3.72382	1.52573	4.49961	3.94915	1.10261	2.44068	2.94915	4.998	66.3	0.472	8.81061	218.299	669.606	35.224	30.2811	1.88532	0.041	3	3	3	2	3	1	1	1	2
0	53	80	1.58	143	91	76	32.0461	91	4.95	6.72356	2.37101	4.49961	1.13783	5.58573	5.90909	2.08379	3.95455	4.90909	3.213	58.344	0.236	9.15377	293.343	832.993	50.53	78.2432	3.66289	0.318	3	4	4	4	4	4	3	3	3
1	53	67	1.75	118	81	83	21.8776	76	4.895	7.80967	1.43389	5.81846	1.34471	6.46496	5.80769	1.06632	4.32692	4.80769	6.069	83.096	0.3776	8.63968	189.015	656.615	31.676	15.7728	1.27547	0.029	2	3	1	1	1	1	1	1	1
1	53	93	1.72	121	107	60	31.4359	97	5.39	7.86139	3.02586	5.43057	1.03439	6.827	7.6	2.92525	5.25	6.6	4.284	91.936	0.4956	9.48281	298.101	919.832	52.33	96.8274	3.65343	0.467	4	4	4	4	4	4	3	3	3
1	54	77	1.8	132	88	68	23.7654	86	5.445	5.9219	1.56938	4.39617	0.801655	5.12025	7.3871	1.95768	5.48387	6.3871	7.854	107.848	0.3953	8.83645	210.002	759.934	40.287	32.957	2.53829	0.292	3	4	2	3	3	3	3	3	3
1	53	72	1.7	121	90	83	24.9135	86	6.16	4.08585	1.33228	2.6377	0.827515	3.25834	4.9375	1.60998	3.1875	3.9375	4.284	92.82	0.3953	8.79604	219.14	756.459	41.938	27.9779	2.0354	0.207	3	3	3	4	2	3	2	2	2
1	52	76	1.73	119	86	76	25.3934	81	8.415	4.34445	2.63069	2.14637	0.982674	3.36178	4.42105	2.67707	2.18421	3.42105	4.641	89.284	0.3894	9.78833	248.559	792.855	43.902	42.091	3.15479	0.428	4	4	4	4	3	3	3	3	3
1	53	76	1.71	116	78	74	25.9909	94	5.115	6.72356	1.35486	4.99095	1.11197	5.61159	6.04651	1.21843	4.48837	5.04651	5.712	99.892	0.4012	8.62694	224.222	810.933	39.55	39.291	1.64516	0.086	2	3	3	3	3	4	2	2	2
1	53	88	1.69	160	109	84	30.8112	99	5.335	6.74942	1.53551	4.86165	1.18955	5.55987	5.67391	1.29083	4.08696	4.67391	4.641	89.284	0.4366	8.79422	270.961	870.628	46.667	52.2073	1.6652	0.111	3	3	4	4	4	4	2	2	2
1	53	75	1.75	131	74	98	24.4898	86	5.72	5.7926	2.3823	3.87898	0.827515	4.96509	7	2.87886	4.6875	6	7.497	79.56	0.3953	9.3031	227.831	800.067	42.666	50.0282	3.67338	0.459	4	4	3	4	4	4	3	3	3
1	53	69	1.7	135	87	84	23.8754	84	5.83	7.00802	2.42746	4.78407	1.11197	5.89604	6.30233	2.18302	4.30233	5.30233	4.641	91.052	0.5782	9.34093	223.019	784.638	38.455	46.1217	2.75788	0.338	4	4	3	3	4	3	3	3	3
1	53	67	1.68	123	86	64	23.7387	86	5.06	5.99948	1.71616	4.34445	0.879235	5.12025	6.82353	1.95188	4.94118	5.82353	6.426	82.212	0.3776	8.85252	210.147	761.317	39.162	36.0393	2.53228	0.29	3	4	2	3	3	3	3	3	3
0	53	51	1.55	148	88	82	21.2279	71	5.28	5.27541	2.2581	3.23248	1.00853	4.26687	5.23077	2.23899	3.20513	4.23077	4.284	69.836	0.3127	9.16952	194.65	651.036	34.603	29.3553	3.88929	0.35	3	4	2	2	3	1	3	3	3
1	50	63	1.71	141	99	80	21.5451	81	5.225	5.27541	0.812916	3.33592	1.57745	3.69796	3.34426	0.515336	2.11475	2.34426	4.998	85.748	0.3009	8.1374	175.321	659.129	29.19	13.0067	0.662091	-0.284	1	1	1	1	1	1	0	0	0
1	44	81	1.68	120	70	63	28.699	102	5.61	6.02534	1.38873	4.05999	1.31885	4.70649	4.56863	1.05299	3.07843	3.56863	3.57	81.328	0.5074	8.74401	250.944	891.889	42.263	51.3831	1.45889	0.021	3	3	4	4	4	4	1	1	1
0	48	72	1.63	133	84	80	27.0993	84	4.565	6.38738	1.1855	4.34445	1.49987	4.88751	4.25862	0.790403	2.89655	3.25862	5.712	63.648	0.2596	8.37965	227.082	703.891	37.389	30.8231	1.41907	-0.102	2	2	3	3	3	2	1	1	1
0	39	56	1.6	132	83	80	21.875	76	4.675	4.49961	0.66614	2.79286	1.39643	3.10318	3.22222	0.47703	2	2.22222	4.998	65.416	0.2065	7.82704	171.217	594.855	29.805	11.9905	0.873068	-0.319	1	1	1	1	1	1	0	0	0
0	41	70	1.63	104	75	91	26.3465	89	4.84	6.90458	1.55809	4.49961	1.68089	5.22369	4.10769	0.926943	2.67692	3.10769	3.57	59.228	0.3009	8.71144	229.516	775.318	36.292	48.3008	1.79232	-0.032	2	2	3	2	4	3	1	1	2
1	35	75	1.63	135	94	91	28.2284	91	5.83	5.94776	1.81777	4.05999	1.06025	4.88751	5.60976	1.71447	3.82927	4.60976	5.712	78.676	0.3776	9.0517	255.515	823.704	45.015	47.2621	2.13941	0.233	3	4	4	4	4	4	2	2	2
1	42	79	1.7	184	125	94	27.3356	86	16.005	9.82674	10.4098	6.1805	1.00853	8.81821	9.74359	10.3218	6.12821	8.74359	6.069	92.82	0.2596	11.8067	322.744	1015.38	54.596	218.607	12.3967	1.014	4	4	4	4	4	4	3	3	3
1	48	70	1.65	128	93	69	25.7117	81	6.05	6.25808	3.8049	3.33592	1.18955	5.06853	5.26087	3.1986	2.80435	4.26087	4.641	114.036	0.4897	9.82742	252.679	796.021	42.457	60.8784	3.74376	0.505	4	4	4	4	4	4	3	3	3
0	41	57	1.65	106	90	84	20.9366	76	4.455	5.68916	0.530654	3.56866	1.88777	3.8014	3.0137	0.281101	1.89041	2.0137	3.927	74.256	0.2301	7.55145	158.102	573.91	26.074	9.55177	0.526458	-0.553	1	1	1	1	1	1	0	0	0
0	46	73	1.66	130	92	67	26.4915	84	5.115	4.88751	0.609687	3.20662	1.39643	3.49108	3.5	0.436604	2.2963	2.5	4.284	64.532	0.2065	7.82844	207.387	657.589	36.396	15.8519	0.794259	-0.357	1	1	2	2	1	1	0	0	0
0	51	63	1.58	136	89	73	25.2363	86	5.445	5.6633	0.982274	3.59452	1.62917	4.03413	3.47619	0.602929	2.20635	2.47619	4.998	69.836	0.2655	8.36788	211.175	719.638	34.435	27.5037	1.15456	-0.222	2	2	2	2	2	2	0	0	1
0	47	66	1.58	108	82	77	26.4381	86	5.06	5.48229	0.869369	3.59452	1.49987	3.98242	3.65517	0.579629	2.39655	2.65517	4.998	61.88	0.3009	8.17245	216.064	702.83	36.234	24.3423	1.08081	-0.237	1	1	3	2	2	2	0	0	1
1	47	75	1.72	144	111	80	25.3515	124	5.39	5.74088	3.36457	2.24981	1.93949	3.8014	2.96	1.73477	1.16	1.96	5.712	98.124	0.6195	9.58891	243.094	1189.03	36.418	198.51	3.13242	0.238	4	4	4	2	4	4	2	2	3
1	44	72	1.78	143	109	75	22.7244	86	5.5	7.11146	5.00169	4.47375	1.18955	5.9219	5.97826	4.20468	3.76087	4.97826	4.284	81.328	0.4366	10.0056	227.371	860.481	38.372	105.036	5.58122	0.623	4	4	3	3	4	4	3	3	3
1	51	83	1.68	138	94	70	29.4076	91	4.62	5.71502	1.51293	3.90484	1.11197	4.60305	5.13953	1.36058	3.51163	4.13953	7.14	104.312	0.4248	8.63551	253.95	785.831	44.652	39.3361	1.65817	0.134	2	3	4	4	3	3	2	2	2
1	37	72	1.76	138	92	60	23.2438	79	5.445	5.17197	1.28712	3.05146	1.52573	3.64624	3.38983	0.843607	2	2.38983	3.927	88.4	0.3245	8.63817	200.784	682.416	32.732	18.0196	1.0166	-0.076	2	2	2	2	2	2	1	1	1
0	49	58	1.59	121	68	75	22.9421	76	4.62	5.14611	0.575816	2.92216	1.96535	3.18076	2.61842	0.292984	1.48684	1.61842	3.213	68.952	0.2242	7.6695	175.955	582.882	28.546	10.3647	0.522695	-0.538	1	1	1	1	1	1	0	0	0
0	49	60	1.56	167	108	78	24.6548	81	5.225	4.62891	3.51135	2.01707	1.00853	3.62038	4.58974	3.48164	2	3.58974	3.213	65.416	0.3953	9.60052	236.699	777.642	41.828	80.761	6.36239	0.542	4	4	3	4	4	3	3	3	3
0	50	60	1.61	123	99	80	23.1473	76	4.95	5.27541	1.08389	3.10318	1.68089	3.59452	3.13846	0.64483	1.84615	2.13846	3.927	67.184	0.2242	8.37101	193.766	636.197	31.169	19.51	1.14485	-0.194	2	2	2	1	2	1	0	0	1
0	46	58	1.51	150	105	83	25.4375	76	4.73	6.12878	0.90324	4.11171	1.60331	4.52547	3.82258	0.56336	2.56452	2.82258	4.641	78.676	0.3245	8.14323	207.143	618.885	34.084	16.2583	0.949065	-0.252	1	1	2	2	1	1	0	0	1
0	45	57	1.54	138	94	100	24.0344	74	4.455	5.09439	1.36615	3.05146	1.42229	3.6721	3.58182	0.960528	2.14545	2.58182	3.57	70.72	0.2655	8.49709	204.223	628.785	33.853	21.8584	1.62652	-0.018	2	2	2	2	2	1	1	1	2
0	39	63	1.67	116	71	75	22.5896	79	4.675	6.59426	0.767754	4.83579	1.39643	5.19783	4.72222	0.549797	3.46296	3.72222	2.856	56.576	0.2537	7.96901	180.016	629.552	30.99	16.1228	1.02815	-0.26	1	1	1	1	1	1	0	0	1
0	45	56	1.6	139	85	117	21.875	74	5.61	4.34445	0.67743	2.19809	1.83605	2.5084	2.3662	0.368961	1.19718	1.3662	3.213	53.924	0.1888	8.02617	175.572	593.937	28.621	10.8389	0.657508	-0.432	1	1	1	1	1	1	0	0	0
1	51	74	1.62	142	101	90	28.1969	86	5.94	7.60279	2.47262	5.35299	1.11197	6.49082	6.83721	2.22363	4.81395	5.83721	5.712	79.56	0.4248	9.37806	264.432	806.513	45.551	51.925	2.62399	0.346	4	4	4	4	4	4	3	3	3
1	49	83	1.62	137	108	97	31.6263	91	5.06	7.05974	2.46133	4.37031	1.55159	5.50815	4.55	1.58633	2.81667	3.55	5.355	86.632	0.3658	9.21314	291.377	838.395	46.324	63.9946	1.85196	0.201	4	3	4	4	4	4	2	2	2
1	52	83	1.81	115	79	70	25.335	86	5.61	4.47375	1.96455	2.48254	1.08611	3.38764	4.11905	1.80879	2.28571	3.11905	2.856	79.56	0.2773	9.09088	230.317	781.816	40.236	41.2555	2.26598	0.258	3	4	3	3	3	3	2	2	2
1	40	87	1.78	154	85	66	27.4587	91	5.005	7.99069	1.86293	5.74088	1.39643	6.59426	5.72222	1.33407	4.11111	4.72222	3.927	94.588	0.413	8.92366	245.032	812.053	40.267	48.4363	1.69111	0.124	3	3	4	3	4	4	2	2	2
0	42	73	1.53	152	95	103	31.1846	89	5.115	5.45643	0.711302	3.51694	1.60331	3.85312	3.40323	0.443646	2.19355	2.40323	5.355	68.068	0.2596	7.98259	248.934	710.45	41.684	22.0504	0.775704	-0.357	1	1	4	4	2	2	0	0	0
0	36	54	1.6	100	72	94	21.0937	74	4.455	5.68916	2.05487	2.767	1.99121	3.69796	2.85714	1.03197	1.38961	1.85714	4.284	79.56	0.3068	8.90531	187.846	658.993	28.357	32.8779	1.87455	0.013	3	3	1	1	3	1	1	1	2
1	46	76	1.66	143	98	90	27.5802	91	5.115	6.10292	2.15649	3.77554	1.34471	4.75821	4.53846	1.60368	2.80769	3.53846	4.641	80.444	0.3953	9.09173	250.752	827.347	41.408	56.0686	2.0278	0.204	3	3	4	3	4	4	2	2	2
1	51	62	1.67	155	110	77	22.231	84	5.06	5.97362	2.51778	3.87898	0.930954	5.04267	6.41667	2.70452	4.16667	5.41667	4.998	83.096	0.413	9.23581	205.321	775.808	37.275	47.8379	3.54636	0.431	4	4	2	3	4	3	3	3	3
1	52	67	1.65	120	81	63	24.6097	81	12.265	4.73235	2.03229	3.0256	0.775795	3.95656	6.1	2.61962	3.9	5.1	3.57	76.024	0.2891	9.90698	243.808	802.465	46.593	32.5167	3.14001	0.418	4	4	4	4	3	4	3	3	3
1	38	68	1.72	143	88	102	22.9854	84	5.445	4.34445	1.99842	2.37911	1.06025	3.2842	4.09756	1.88485	2.2439	3.09756	5.355	100.776	0.4838	9.07812	208.664	762.562	36.692	37.97	2.42926	0.274	3	4	2	1	3	3	2	2	2
1	46	70	1.7	105	75	68	24.2215	81	6.215	4.93923	1.53551	3.36178	0.879235	4.05999	5.61765	1.74642	3.82353	4.61765	5.712	99.892	0.4189	8.9469	216.707	724.699	40.465	24.5681	2.11127	0.243	3	4	3	3	2	2	2	2	2
1	40	74	1.7	144	103	79	25.6055	86	5.28	4.21515	1.43389	2.37911	1.18955	3.0256	3.54348	1.20541	2	2.54348	5.712	101.66	0.5074	8.71539	223.162	749.523	38.564	30.1118	1.50134	0.083	2	3	3	3	3	3	2	2	2
1	42	75	1.68	145	95	66	26.5731	86	5.06	4.91337	1.97584	2.99974	1.00853	3.90484	4.87179	1.95912	2.97436	3.87179	3.213	96.356	0.354	8.99343	238.984	773.435	42.669	41.4926	2.39058	0.292	3	4	3	4	3	3	3	3	2
1	48	60	1.65	100	65	69	22.0386	81	5.39	5.48229	1.55809	3.18076	1.57745	3.90484	3.47541	0.987727	2.01639	2.47541	3.927	106.08	0.4307	8.81907	194.36	714.345	31.156	24.9294	1.25449	-0.004	3	3	2	1	2	2	1	1	1
1	44	65	1.63	136	97	62	24.4646	79	5.06	5.97362	1.23067	4.44789	0.956814	5.01681	6.24324	1.28621	4.64865	5.24324	4.641	91.936	0.4248	8.51999	208.438	673.079	38.477	17.2293	1.50844	0.111	2	3	2	3	1	1	2	2	2
1	41	71	1.64	137	95	82	26.398	86	5.06	5.74088	2.04358	3.4135	1.39643	4.34445	4.11111	1.46343	2.44444	3.11111	3.57	79.56	0.4838	9.02714	238.298	776.334	39.047	42.9152	1.79231	0.164	3	3	3	3	3	3	2	2	2
0	36	61	1.63	140	90	98	22.9591	79	5.445	7.16318	1.14034	5.14611	1.49987	5.6633	4.77586	0.760293	3.43103	3.77586	2.856	53.04	0.2773	8.51709	195.545	672.85	32.233	23.9472	1.40937	-0.119	2	2	2	2	2	1	1	1	1
0	46	65	1.57	124	87	82	26.3702	86	4.785	5.04267	0.700011	3.38764	1.34471	3.69796	3.75	0.520566	2.51923	2.75	3.927	70.72	0.3068	7.8999	208.322	679.391	36.465	19.6003	0.97212	-0.284	1	1	2	2	2	2	0	0	1
0	49	66	1.55	137	99	96	27.4714	76	5.06	6.64598	1.67099	4.52547	1.34471	5.30127	4.94231	1.24264	3.36538	3.94231	4.641	77.792	0.3245	8.82585	242.458	670.765	40.359	30.0779	2.00249	0.093	3	3	4	3	3	1	2	2	2
0	37	75	1.7	127	109	71	25.9516	86	5.06	4.24101	0.801626	2.48254	1.39643	2.84458	3.03704	0.574053	1.77778	2.03704	3.927	65.416	0.3304	8.09132	209.982	695.854	36.048	22.4455	1.08191	-0.244	1	1	2	2	2	2	0	0	1
0	45	84	1.67	121	86	110	30.1194	86	5.61	7.05974	1.60325	4.68063	1.65503	5.40471	4.26562	0.968715	2.82813	3.26562	2.856	60.112	0.354	8.88765	267.691	764.338	42.342	44.891	1.67192	-0.013	3	3	4	4	3	3	1	1	2
0	51	66	1.54	142	97	71	27.8293	81	4.51	5.37885	1.67099	3.05146	1.55159	3.82726	3.46667	1.07696	1.96667	2.46667	4.641	56.576	0.3127	8.71078	242.415	705.574	39.036	38.4329	1.83564	0.033	2	3	4	3	3	2	1	1	2
0	36	59	1.58	117	87	82	23.634	81	4.73	5.19783	0.812916	3.59452	1.24127	3.95656	4.1875	0.654906	2.89583	3.1875	4.641	53.04	0.472	8.03787	189.967	651.067	33.555	18.6971	1.2252	-0.187	1	2	1	2	2	1	0	0	1
1	50	85	1.7	139	83	63	29.4118	91	5.555	2.61184	0.541944	1.00853	1.34471	1.26713	1.94231	0.403019	0.75	0.942308	3.57	80.444	0.3717	7.79317	229.211	709.179	41.097	14.0905	0.491129	-0.398	1	1	3	3	1	2	0	0	0
1	50	87	1.75	135	86	65	28.4082	97	5.39	7.42177	3.0936	4.75821	1.24127	6.1805	5.97917	2.49228	3.83333	4.97917	4.998	110.5	0.3068	9.50495	270.018	921.98	45.154	98.9951	3.30303	0.396	4	4	4	4	4	4	3	3	3
1	49	76	1.7	152	88	86	26.2976	97	5.665	6.36152	1.14034	4.52547	1.31885	5.04267	4.82353	0.864647	3.43137	3.82353	6.426	76.024	0.3127	8.5567	225.021	830	38.307	36.4909	1.19694	-0.066	2	2	3	3	3	4	1	1	1
1	49	64	1.72	149	102	80	21.6333	76	5.06	5.22369	1.14034	3.20662	1.49987	3.72382	3.48276	0.760293	2.13793	2.48276	3.57	85.748	0.4189	8.44376	182.667	641.726	30.111	12.5438	0.914617	-0.119	2	2	1	1	1	1	1	1	0
0	45	68	1.7	160	103	84	23.5294	84	5.005	5.71502	2.12261	3.56866	1.16369	4.55133	4.91111	1.82403	3.06667	3.91111	6.783	68.952	0.2891	9.05415	213.039	760.549	36.553	55.188	3.54744	0.26	3	4	2	2	4	3	2	2	3
1	48	78	1.7	142	102	77	26.9896	89	5.39	7.00802	1.62583	5.19783	1.06025	5.94776	6.60976	1.53344	4.90244	5.60976	4.641	110.5	0.5487	8.86163	239.172	788.685	42.364	39.02	1.91966	0.185	3	3	3	4	3	3	2	2	2
1	49	67	1.7	142	100	60	23.1834	79	4.29	4.99095	1.05002	2.71528	1.78433	3.20662	2.7971	0.588466	1.52174	1.7971	5.712	98.124	0.4307	8.19616	190.015	647.497	30.206	14.7002	0.710103	-0.229	1	0	1	1	1	1	0	0	0
1	52	80	1.7	192	111	62	27.6817	79	6.985	5.71502	3.05973	3.33592	0.982674	4.73235	5.81579	3.11367	3.39474	4.81579	4.998	89.284	0.5015	9.75316	269.984	770.5	47.661	42.8362	3.41085	0.493	4	4	4	4	3	3	3	3	3
1	51	79	1.8	128	89	76	24.3827	86	5.995	4.31859	1.86293	1.75847	1.70675	2.61184	2.5303	1.09151	1.0303	1.5303	4.641	98.124	0.3363	9.10415	221.984	782.957	34.612	39.1216	1.39603	0.037	3	3	3	2	3	3	1	1	1
1	50	78	1.68	129	93	62	27.6361	91	5.61	7.2149	1.62583	4.73235	1.73261	5.48229	4.16418	0.938372	2.73134	3.16418	3.927	106.964	0.5074	8.90164	246.006	810.049	38.47	42.2716	1.18518	-0.027	3	2	4	3	3	4	1	1	1
1	46	69	1.6	103	63	64	26.9531	81	5.445	5.32713	0.508073	3.62038	1.47401	3.85312	3.61404	0.344687	2.45614	2.61404	5.712	92.82	0.3835	7.70864	207.772	624.399	36.615	8.12916	0.393013	-0.469	1	1	2	2	1	1	0	0	0
1	46	84	1.76	147	105	76	27.1178	91	5.775	5.68916	2.021	3.64624	1.11197	4.57719	5.11628	1.81749	3.27907	4.11628	6.069	90.168	0.4366	9.1482	248.079	832.486	43	52.546	2.3202	0.26	3	4	4	4	4	4	2	2	2
1	50	77	1.62	138	94	70	29.34	97	4.51	6.28394	2.65327	4.08585	0.982674	5.30127	6.39474	2.70005	4.15789	5.39474	4.284	92.82	0.3658	9.17316	269.141	889.796	48.306	84.9046	3.51228	0.431	3	4	4	4	4	4	3	3	3
1	43	60	1.69	129	83	69	21.0077	76	5.775	6.0512	6.01784	3.46522	0.930954	5.12025	6.5	6.46416	3.72222	5.5	2.856	95.472	0.2832	10.2393	215.105	778.189	38.758	66.1962	7.89178	0.81	4	4	3	3	4	3	3	3	3
1	45	76	1.68	120	88	70	26.9274	84	5.665	7.16318	2.72101	5.06853	0.853375	6.3098	8.39394	3.18853	5.93939	7.39394	4.998	110.5	0.4779	9.42638	253.828	791.816	47.002	51.6992	3.77224	0.504	4	4	4	4	4	3	3	3	3
1	45	70	1.62	148	110	75	26.6728	91	5.72	5.53401	1.16292	3.2842	1.70675	3.82726	3.24242	0.681367	1.92424	2.24242	4.998	89.284	0.3422	8.58597	229.012	781.324	36.538	30.236	0.87793	-0.167	2	2	3	2	3	3	0	0	0
0	46	69	1.65	136	93	71	25.3444	81	5.06	5.27541	1.77261	3.36178	1.11197	4.16343	4.74419	1.59411	3.02326	3.74419	4.998	56.576	0.2832	8.88489	225.182	719.676	39.291	40.77	2.86817	0.201	3	3	3	3	3	2	2	2	3
0	47	61	1.62	155	95	107	23.2434	81	6.105	4.08585	1.25325	1.83605	1.68089	2.40497	2.43077	0.745585	1.09231	1.43077	4.284	54.808	0.2655	8.72591	202.82	706.799	32.336	28.8247	1.40764	-0.125	2	2	2	2	3	2	1	1	1
1	37	80	1.83	134	88	70	23.8884	89	5.445	6.54254	1.7839	4.16343	1.55159	4.99095	4.21667	1.14972	2.68333	3.21667	3.57	114.036	0.3245	8.96457	214.15	797.847	34.28	42.8136	1.5385	0.061	3	3	2	2	3	4	2	2	2
1	40	86	1.83	127	75	63	25.6801	89	4.675	5.97362	2.6194	3.5428	1.24127	4.73235	4.8125	2.11025	2.85417	3.8125	4.284	91.936	0.3186	9.19624	236.16	818.465	39.778	62.8655	2.71569	0.324	4	4	3	3	4	4	3	3	3
1	43	83	1.74	115	86	60	27.4145	86	5.775	5.06853	1.82906	3.2842	0.956814	4.11171	5.2973	1.91162	3.43243	4.2973	5.355	95.472	0.4189	9.04841	248.057	778.163	44.93	38.4103	2.29217	0.281	3	4	4	4	3	3	2	2	2
1	45	70	1.68	128	96	69	24.8016	86	5.06	6.23222	1.34357	4.52547	1.08611	5.14611	5.7381	1.23704	4.16667	4.7381	2.856	79.56	0.3127	8.60776	213.486	740.268	37.911	28.215	1.56773	0.093	2	3	2	3	2	3	2	2	2
1	38	76	1.71	135	94	97	25.9909	86	5.555	5.37885	1.77261	3.20662	1.37057	4.00828	3.92453	1.29334	2.33962	2.92453	5.712	114.92	0.4956	8.97822	233.352	772.127	38.513	37.2248	1.59768	0.111	3	3	3	3	3	3	2	2	2
1	45	74	1.7	132	77	66	25.6055	81	5.445	5.97362	1.19679	3.59452	1.83605	4.13757	3.25352	0.651831	1.95775	2.25352	3.927	77.792	0.3363	8.56541	219.322	693.798	34.348	19.1487	0.76466	-0.187	2	2	3	2	2	2	0	0	0
1	44	80	1.62	123	96	80	30.4832	89	5.335	5.89604	4.93395	3.62038	0.905094	4.99095	6.51429	5.45131	4	5.51429	3.213	79.56	0.3599	9.9615	303.658	886.573	55.273	118.415	6.36217	0.736	4	4	4	4	4	4	3	3	3
1	51	76	1.7	139	84	65	26.2976	86	4.73	6.98216	0.948402	5.30127	1.24127	5.74088	5.625	0.764057	4.27083	4.625	5.355	104.312	0.4071	8.19202	215.43	704.513	37.673	19.9165	0.937747	-0.119	1	2	3	3	2	2	1	1	1
1	49	70	1.6	161	88	61	27.3437	86	5.555	4.86165	0.925821	3.10318	1.34471	3.51694	3.61538	0.688491	2.30769	2.61538	4.998	85.748	0.3009	8.32869	227.738	716.268	39.087	19.4422	0.826757	-0.161	1	2	3	3	2	2	0	0	0
1	46	64	1.7	129	102	82	22.1453	81	5.39	4.80993	0.937112	3.31006	1.06025	3.74968	4.53659	0.883857	3.12195	3.53659	3.927	76.908	0.354	8.31066	184.042	673.164	33.588	14.9938	1.1198	-0.056	1	2	1	2	1	1	1	1	1
1	37	73	1.71	152	106	77	24.9649	86	5.665	5.37885	0.553235	4.05999	1.06025	4.31859	5.07317	0.521795	3.82927	4.07317	3.57	74.256	0.4248	7.8334	195.56	673.673	37.244	11.6179	0.658937	-0.284	1	1	2	3	1	1	0	0	0
1	50	80	1.79	137	100	66	24.968	86	5.17	5.97362	1.16292	3.9307	1.49987	4.47375	3.98276	0.775348	2.62069	2.98276	4.641	108.732	0.2714	8.48488	211.85	729.699	34.889	24.4214	0.979066	-0.108	2	2	2	2	2	2	1	1	1
1	50	69	1.65	133	92	93	25.3444	86	5.83	7.31833	1.87422	5.45643	1.00853	6.3098	7.25641	1.85836	5.41026	6.25641	4.284	111.384	0.4956	9.08228	230.184	781.076	41.05	39.3587	2.32763	0.27	3	4	3	3	3	3	2	2	2
1	36	71	1.64	92	72	103	26.398	84	6.545	6.87872	1.25325	4.93923	1.37057	5.50815	5.01887	0.914397	3.60377	4.01887	4.284	81.328	0.4071	8.79551	232.184	738.823	38.933	23.8117	1.09385	-0.041	3	2	3	3	2	3	1	1	1
1	50	76	1.68	161	95	81	26.9274	84	5.335	5.01681	2.3823	2.6377	1.29299	3.72382	3.88	1.84247	2.04	2.88	6.426	89.284	0.3776	9.23342	248.632	775.607	41.33	45.2636	2.17976	0.265	4	4	4	3	3	3	2	2	2
0	36	51	1.55	136	92	99	21.2279	74	4.125	4.88751	1.45648	2.24981	1.96535	2.92216	2.48684	0.741078	1.14474	1.48684	3.213	44.2	0.3186	8.48415	180.101	627.827	27.605	23.3036	1.3417	-0.131	2	2	1	1	2	1	1	1	1
1	35	83	1.8	135	95	68	25.6173	86	5.94	5.22369	3.11618	2.8963	0.905094	4.31859	5.77143	3.44293	3.2	4.77143	3.927	96.356	0.5192	9.60938	246.166	826.407	44.667	65.4398	4.28713	0.537	4	4	4	4	4	4	3	3	3
1	46	91	1.75	122	92	70	29.7143	91	6.325	5.94776	3.29683	3.2842	1.16369	4.78407	5.11111	2.83307	2.82222	4.11111	2.856	100.776	0.4366	9.72854	289.077	885.297	48.839	85.7175	3.4319	0.452	4	4	4	4	4	4	3	3	3
1	39	88	1.64	209	79	71	32.7186	97	5.61	3.72382	1.69358	1.99121	0.956814	2.767	3.89189	1.77002	2.08108	2.89189	5.355	90.168	0.4248	8.94246	292.585	867.419	53.184	54.1944	2.15795	0.248	3	4	4	4	4	4	2	2	2
1	38	75	1.68	125	83	77	26.5731	84	4.95	5.12025	1.26454	3.56866	0.982674	4.13757	5.21053	1.28683	3.63158	4.21053	6.783	99.892	0.2124	8.52516	226.54	716.114	41.465	24.0262	1.53372	0.111	2	3	3	3	2	2	2	2	2
0	45	91	1.67	169	109	101	32.6294	102	5.665	6.23222	1.41131	4.11171	1.47401	4.75821	4.22807	0.957465	2.78947	3.22807	2.856	61.88	0.295	8.7699	286.156	894.529	46.827	62.0978	1.86531	-0.018	3	2	4	4	4	4	1	1	2
1	42	60	1.7	139	81	80	20.7612	76	4.565	5.71502	1.45648	3.74968	1.29299	4.42203	4.42	1.12644	2.9	3.42	3.927	75.14	0.2124	8.58551	178.246	652.498	30.179	16.0212	1.38331	0.053	2	3	1	1	1	1	1	1	1
1	51	74	1.63	117	98	65	27.852	89	5.39	5.97362	2.69843	3.62038	1.11197	4.86165	5.37209	2.4267	3.25581	4.37209	4.284	76.908	0.3953	9.36828	260.926	833.777	44.985	64.7623	2.98439	0.386	4	4	4	4	4	4	3	3	3
1	45	76	1.76	141	90	98	24.5351	86	5.5	4.96509	1.32099	3.46522	0.905094	4.05999	5.48571	1.4595	3.82857	4.48571	4.284	90.168	0.3658	8.6742	212.822	745.981	39.75	27.7408	1.86046	0.164	2	3	2	3	2	3	2	2	2
1	49	68	1.64	143	102	74	25.2826	99	4.785	5.14611	0.982274	3.56866	1.13783	4.00828	4.52273	0.863285	3.13636	3.52273	4.641	84.864	0.2891	8.23867	208.295	815.628	37.173	33.3973	1.24638	-0.066	1	2	2	3	3	4	1	1	1
1	44	70	1.67	109	84	74	25.0995	84	4.62	6.77528	1.5468	4.88751	1.18955	5.58573	5.69565	1.30032	4.1087	4.69565	5.355	95.472	0.4366	8.65765	217.303	727.243	37.502	29.3892	1.59922	0.114	2	3	3	3	3	2	2	2	2
0	39	59	1.62	107	68	78	22.4813	84	4.51	4.42203	1.27583	2.87044	0.956814	3.46522	4.62162	1.33341	3	3.62162	3.57	62.764	0.2891	8.44096	189.764	709.041	35.013	33.1715	2.65823	0.124	2	3	1	2	3	2	2	2	3
1	41	74	1.65	129	107	74	27.1809	86	6.05	6.15464	1.44518	4.62891	0.853375	5.30127	7.21212	1.69349	5.42424	6.21212	3.927	95.472	0.3894	8.85936	240.805	761.905	45.492	30.3489	2.04045	0.228	3	4	4	4	3	3	2	2	2
0	35	75	1.64	110	76	80	27.8852	86	5.775	5.04267	1.14034	3.20662	1.31885	3.72382	3.82353	0.864647	2.43137	2.82353	3.927	60.996	0.3304	8.57593	239.142	737.53	40.715	31.9295	1.56288	-0.066	2	2	3	3	3	3	1	1	2
0	40	63	1.6	113	81	77	24.6094	79	4.73	6.41324	0.620978	4.37031	1.75847	4.65477	3.64706	0.353135	2.48529	2.64706	3.213	65.416	0.3068	7.76853	191.179	613.714	31.641	13.0405	0.630042	-0.456	1	1	1	1	1	1	0	0	0
0	46	50	1.56	108	77	75	20.5457	74	5.005	6.62012	0.959693	4.29273	1.88777	4.73235	3.50685	0.508374	2.27397	2.50685	4.641	59.228	0.2301	8.26036	169.715	611.267	26.761	15.3551	0.936132	-0.292	1	1	1	1	1	1	0	0	1
0	41	64	1.59	122	90	87	25.3155	79	4.895	4.80993	0.846788	3.1549	1.26713	3.5428	3.79592	0.668271	2.4898	2.79592	2.856	60.112	0.2714	8.11298	205.384	640.925	36	17.7825	1.17344	-0.174	1	2	2	2	2	1	0	0	1
1	60	74	1.7	132	87	86	25.6055	84	5.335	5.97362	2.11132	3.59452	1.42229	4.55133	4.2	1.48445	2.52727	3.2	6.426	70.72	0.3894	9.11267	233.335	765.464	37.979	40.1152	1.8059	0.17	3	3	3	3	3	3	2	2	2
1	56	68	1.69	114	84	66	23.8087	84	4.84	4.34445	1.51293	1.86191	1.78433	2.56012	2.43478	0.847897	1.04348	1.43478	3.213	70.72	0.3422	8.68203	206.708	729.29	32.259	28.7456	1.07277	-0.071	2	2	2	2	3	2	1	1	1
0	53	47	1.54	115	80	64	19.8178	61	4.785	7.62865	0.519363	4.68063	2.71528	4.91337	2.80952	0.191274	1.72381	1.80952	4.641	70.72	0.3009	7.6014	150.643	463.686	22.97	1.55809	0.295735	-0.721	1	1	1	1	1	1	0	0	0
1	39	76	1.75	156	100	67	24.8163	89	4.4	5.37885	1.29841	3.74968	1.03439	4.34445	5.2	1.25524	3.625	4.2	4.641	113.152	0.295	8.43381	209.296	750.609	37.791	31.1618	1.64575	0.1	2	3	2	3	3	3	2	2	2
0	44	45	1.5	141	84	77	20	69	4.95	5.43057	0.711302	2.92216	2.17223	3.25834	2.5	0.327453	1.34524	1.5	3.57	62.764	0.2596	7.9498	158.996	548.536	24.795	7.82432	0.570033	-0.481	1	1	1	1	1	1	0	0	0
1	60	57	1.63	120	75	92	21.4536	84	5.445	6.4391	1.3097	3.95656	1.88777	4.55133	3.41096	0.693781	2.09589	2.41096	3.213	71.604	0.4071	8.65556	185.693	727.067	28.744	24.8843	0.926354	-0.161	2	2	1	1	2	2	0	0	1
0	43	57	1.62	114	74	84	21.7193	76	5.115	4.08585	0.937112	2.04293	1.60331	2.48254	2.54839	0.584486	1.27419	1.54839	2.856	64.532	0.2183	8.25829	179.364	627.63	29.443	16.868	1.07379	-0.237	1	1	1	1	1	1	0	0	1
1	44	96	1.83	127	92	82	28.6661	94	5.555	5.58573	1.58067	3.74968	1.11197	4.47375	5.02326	1.4215	3.37209	4.02326	4.284	83.98	0.3658	8.86362	254.086	833.18	44.476	45.8394	1.81619	0.152	3	3	4	4	3	4	2	2	2
0	42	58	1.6	116	94	89	22.6562	71	4.62	6.827	1.24196	4.99095	1.26713	5.55987	5.38776	0.980131	3.93878	4.38776	3.213	57.46	0.2478	8.43815	191.177	599.109	32.767	16.1454	1.64467	-0.009	2	3	1	2	1	1	1	1	2
0	47	52	1.52	102	62	63	22.5069	76	4.62	2.94802	0.711302	1.24127	1.37057	1.57745	2.15094	0.518982	0.90566	1.15094	4.641	66.3	0.2301	7.8808	177.373	598.941	30.856	12.8034	0.93551	-0.284	1	1	1	1	1	1	0	0	1
0	36	49	1.65	116	52	87	17.9982	79	4.675	3.98242	0.598397	2.14637	1.55159	2.43082	2.56667	0.385667	1.38333	1.56667	3.927	57.46	0.2124	7.7198	138.942	609.864	23.772	12.5663	0.809868	-0.409	1	1	1	1	1	1	0	0	0
1	57	61	1.6	127	104	84	23.8281	79	4.95	4.70649	2.34842	2.99974	0.775795	3.9307	6.06667	3.02712	3.86667	5.06667	5.712	74.256	0.3186	9.1442	217.889	722.392	41.765	32.8779	3.60042	0.481	3	4	3	4	3	2	3	3	3
0	36	52	1.59	114	93	92	20.5688	71	4.895	4.26687	0.530654	2.61184	1.42229	2.84458	3	0.373098	1.83636	2	3.57	60.996	0.2065	7.64564	157.262	542.84	27.801	6.8985	0.658797	-0.432	1	1	1	1	1	1	0	0	0
0	45	65	1.6	101	85	67	25.3906	86	4.62	7.2149	0.654849	4.49961	2.40497	4.80993	3	0.272291	1.87097	2	3.213	64.532	0.2478	7.79811	197.999	670.638	30.364	18.3358	0.519615	-0.569	1	1	2	1	2	1	0	0	0
1	49	72	1.71	112	64	67	24.623	89	4.675	5.01681	1.64841	3.25834	1.00853	4.00828	4.97436	1.63447	3.23077	3.97436	4.641	90.168	0.3894	8.73311	215.035	777.247	38.68	39.5619	2.15202	0.212	2	3	3	3	3	3	2	2	2
0	41	53	1.58	109	64	73	21.2306	71	4.51	4.55133	1.01615	2.87044	1.21541	3.33592	3.74468	0.83605	2.3617	2.74468	3.927	68.068	0.1593	8.21338	174.375	583.15	30.533	13.2099	1.45218	-0.076	1	2	1	1	1	1	1	1	1
0	56	59	1.55	112	77	90	24.5578	81	4.785	4.68063	1.20808	2.43082	1.70675	2.97388	2.74242	0.707827	1.42424	1.74242	3.57	60.112	0.2596	8.44559	207.405	684.093	33.052	27.7859	1.29635	-0.149	2	2	2	2	2	2	1	0	1
0	36	47	1.53	136	80	96	20.0777	74	5.225	4.62891	0.519363	2.40497	1.99121	2.6377	2.32468	0.260828	1.20779	1.32468	2.856	53.04	0.2891	7.68937	154.385	569.013	25.258	8.30981	0.485995	-0.585	1	1	1	1	1	1	0	0	0
0	55	66	1.67	133	79	75	23.6652	76	4.84	5.30127	1.16292	3.07732	1.68089	3.62038	3.15385	0.691849	1.83077	2.15385	5.355	60.996	0.3009	8.41892	199.236	639.838	31.931	20.9326	1.21354	-0.161	2	2	2	1	2	1	0	0	1
0	45	72	1.58	121	84	79	28.8415	86	4.675	6.15464	1.19679	4.21515	1.39643	4.75821	4.40741	0.857037	3.01852	3.40741	4.641	70.72	0.3422	8.41294	242.642	723.513	40.635	33.5102	1.51839	-0.066	2	2	4	3	3	2	1	1	2
1	52	64	1.65	113	75	61	23.5078	84	5.115	6.07706	1.94197	3.98242	1.21541	4.86165	5	1.59778	3.2766	4	4.641	76.024	0.354	8.98695	211.263	754.904	35.908	36.8974	2.03517	0.204	3	3	2	2	3	3	2	2	2
1	49	88	1.75	162	94	63	28.7347	91	6.105	7.80967	1.44518	5.7926	1.34471	6.46496	5.80769	1.07472	4.30769	4.80769	5.712	78.676	0.4661	8.86841	254.831	807.026	42.594	37.5748	1.32747	0.029	3	3	4	4	3	4	1	1	1
1	52	90	1.7	121	92	82	31.1419	107	12.65	7.24076	2.82263	5.04267	0.905094	6.33566	8	3.1186	5.57143	7	5.712	70.72	0.4956	10.2664	319.715	1098.5	57.503	118.55	4.32064	0.494	4	4	4	4	4	4	3	3	3
1	50	78	1.67	122	66	65	27.968	84	5.335	6.12878	2.29197	3.9307	1.13783	4.99095	5.38636	2.01433	3.45455	4.38636	6.426	86.632	0.4838	9.19477	257.159	772.361	44.229	43.5475	2.33255	0.303	4	4	4	4	3	3	3	3	2
1	41	64	1.65	125	88	73	23.5078	79	4.565	5.30127	0.508073	3.56866	1.49987	3.8014	3.53448	0.338744	2.37931	2.53448	4.998	77.792	0.3717	7.53236	177.069	595.056	30.987	7.11302	0.405791	-0.469	1	1	1	1	1	1	0	0	0
1	36	74	1.8	120	78	68	22.8395	79	4.675	5.09439	1.05002	3.33592	1.26713	3.82726	4.02041	0.828656	2.63265	3.02041	5.355	100.776	0.3776	8.2821	189.159	654.286	32.701	14.7002	1.00777	-0.081	1	2	1	2	1	1	1	1	1
0	46	55	1.63	115	74	93	20.7008	74	4.84	4.60305	1.15163	2.48254	1.60331	2.99974	2.87097	0.718284	1.54839	1.87097	4.641	56.576	0.3009	8.40916	174.077	622.278	28.226	18.4261	1.31754	-0.143	2	2	1	1	2	1	1	1	1
1	47	60	1.65	113	82	80	22.0386	79	5.39	5.24955	1.16292	2.84458	1.86191	3.38764	2.81944	0.624586	1.52778	1.81944	4.284	98.124	0.3835	8.52655	187.913	673.597	29.378	16.2809	0.773688	-0.208	2	2	1	1	1	1	0	0	0
1	40	72	1.64	144	100	70	26.7698	81	5.06	8.50789	0.89195	6.38738	1.70675	6.80114	4.98485	0.522602	3.74242	3.98485	6.426	111.384	0.354	8.19809	219.461	664.045	35.604	14.2712	0.598153	-0.284	1	1	3	2	1	1	0	0	0
1	38	63	1.66	125	73	67	22.8625	79	5.115	4.68063	0.700011	2.5084	1.86191	2.81872	2.51389	0.375964	1.34722	1.51389	5.355	106.08	0.5959	7.96659	182.136	629.36	29.471	9.80016	0.456987	-0.42	1	1	1	1	1	1	0	0	0
1	38	72	1.83	124	75	83	21.4996	86	4.785	6.5684	1.97584	4.34445	1.31885	5.24955	4.98039	1.49815	3.29412	3.98039	4.284	94.588	0.4307	8.93755	192.154	768.629	32.017	41.4926	2.04578	0.176	3	3	1	1	3	3	2	2	2
1	60	73	1.67	147	94	67	26.1752	84	6.435	6.85286	3.05973	4.47375	0.982674	5.87018	6.97368	3.11367	4.55263	5.97368	4.998	95.472	0.3186	9.67115	253.144	812.376	44.799	58.1348	3.74228	0.493	4	4	4	4	4	4	3	3	3
1	59	74	1.69	122	76	89	25.9095	91	8.25	4.44789	1.52422	2.45668	1.29299	3.1549	3.44	1.17883	1.9	2.44	2.856	70.72	0.3422	9.22276	238.957	839.271	40.238	39.6297	1.54356	0.072	4	3	3	3	3	4	2	2	2
1	38	66	1.67	150	112	90	23.6652	84	5.83	4.96509	2.04358	2.48254	1.55159	3.4135	3.2	1.31709	1.6	2.2	5.355	86.632	0.3953	9.16879	216.982	770.178	34.535	38.828	1.67174	0.121	3	3	3	2	3	3	2	2	2
1	55	94	1.73	155	106	86	31.4077	102	5.445	4.03413	1.20808	2.61184	0.879235	3.1549	4.58824	1.37402	2.97059	3.58824	4.284	87.516	0.2773	8.5748	269.314	874.63	50.952	44.6991	1.80548	0.137	2	3	4	4	3	4	2	2	2
1	55	68	1.68	117	74	80	24.093	86	4.785	4.62891	1.34357	2.84458	1.16369	3.46522	3.97778	1.15457	2.44444	2.97778	5.355	98.124	0.2537	8.55188	206.04	735.462	35.946	28.215	1.48616	0.061	2	3	2	2	2	3	2	2	2
1	55	80	1.67	184	117	84	28.6851	86	9.515	4.44789	1.35486	2.68942	1.13783	3.31006	3.90909	1.19074	2.36364	2.90909	4.641	111.384	0.4484	9.24764	265.27	795.297	46.582	28.4521	1.39135	0.076	4	3	4	4	3	4	2	2	1
1	45	90	1.8	135	86	90	27.7778	86	4.125	4.29273	1.06131	2.45668	1.34471	2.94802	3.19231	0.789245	1.82692	2.19231	4.998	94.588	0.4779	8.16764	226.879	702.417	38.649	22.2875	0.939331	-0.102	1	2	3	3	2	2	1	1	1
1	45	80	1.67	155	103	84	28.6851	89	5.28	4.86165	4.07587	2.17223	0.827515	4.03413	5.875	4.92544	2.625	4.875	3.927	83.98	0.4248	9.76008	279.969	868.647	52.28	97.8209	5.95601	0.693	4	4	4	4	4	4	3	3	3
1	43	73	1.74	136	81	73	24.1115	91	6.105	6.36152	1.76132	4.37031	1.18955	5.17197	5.34783	1.48066	3.67391	4.34783	5.712	94.588	0.3776	9.06624	218.601	825.028	37.374	45.7943	2.01587	0.17	3	3	3	3	3	4	2	2	2
1	46	75	1.74	124	73	65	24.7721	86	4.785	3.62038	1.27583	2.09465	0.930954	2.68942	3.88889	1.37045	2.25	2.88889	3.927	93.704	0.5015	8.50015	210.567	731.013	39.119	26.7924	1.73792	0.137	2	3	2	3	2	2	2	2	2
1	38	82	1.85	139	81	80	23.9591	102	6.05	6.25808	2.42746	4.03413	1.11197	5.14611	5.62791	2.18302	3.62791	4.62791	4.998	96.356	0.3953	9.37797	224.688	956.553	38.702	89.816	3.34264	0.338	4	4	3	3	4	4	3	3	3
1	38	69	1.65	125	93	86	25.3444	81	5.225	6.36152	1.12905	4.26687	1.57745	4.78407	4.03279	0.715744	2.70492	3.03279	4.998	100.776	0.4838	8.4659	214.563	685.738	34.95	18.0648	0.844357	-0.143	2	2	2	2	2	2	1	1	0
0	54	54	1.61	108	77	86	20.8325	89	5.115	5.48229	2.28068	3.20662	1.24127	4.24101	4.41667	1.83737	2.58333	3.41667	3.57	67.184	0.2242	9.14772	190.57	814.147	32.075	70.7011	4.04016	0.265	3	4	1	1	4	4	2	2	3
0	51	61	1.6	115	75	82	23.8281	81	4.4	6.46496	0.711302	3.33592	2.79286	3.6721	2.31481	0.254686	1.19444	1.31481	4.998	59.228	0.2773	7.83201	186.622	634.393	27.52	16.3599	0.474326	-0.602	1	1	1	1	1	1	0	0	0
0	36	63	1.59	109	65	71	24.9199	81	4.29	4.73235	0.45162	2.92216	1.65503	3.07732	2.85938	0.272877	1.76562	1.85938	3.57	53.04	0.1357	7.35244	183.222	595.548	31.626	10.3873	0.495675	-0.569	1	1	1	1	1	1	0	0	0
0	44	52	1.6	112	56	67	20.3125	71	4.18	5.48229	0.970983	3.23248	1.81019	3.6721	3.02857	0.536399	1.78571	2.02857	6.069	75.14	0.2006	8.09193	164.367	574.527	26.16	12.6228	0.953265	-0.268	1	1	1	1	1	1	0	0	1
1	44	82	1.72	105	82	84	27.7177	86	4.95	6.85286	3.34199	4.42203	0.905094	5.94776	7.57143	3.69242	4.88571	6.57143	6.783	108.732	0.4897	9.49702	263.235	816.744	48.07	70.1818	4.39999	0.567	4	4	4	4	4	4	3	3	3
1	59	86	1.72	122	83	88	29.0698	100	7.26	3.43936	1.67099	1.34471	1.31885	2.12051	2.60784	1.26701	1.01961	1.60784	6.783	82.212	0.4779	9.18687	267.06	918.687	44.517	58.4848	1.70828	0.104	4	3	4	4	4	4	2	2	2
1	55	76	1.7	176	97	82	26.2976	91	5.775	7.16318	1.53551	5.40471	1.06025	6.10292	6.7561	1.44825	5.09756	5.7561	3.927	75.14	0.4543	8.87347	233.351	807.486	41.405	39.9232	1.88081	0.161	3	3	3	3	3	4	2	2	2
1	52	62	1.7	129	87	70	21.4533	86	6.105	5.43057	1.70487	2.97388	1.68089	3.74968	3.23077	1.01426	1.76923	2.23077	5.712	91.936	0.5192	9.03366	193.802	776.895	30.428	35.8022	1.38652	0.004	3	3	2	1	3	3	1	1	1
0	41	63	1.58	163	101	80	25.2363	91	4.675	5.06853	1.1855	3.0256	1.49987	3.56866	3.37931	0.790403	2.01724	2.37931	5.355	66.3	0.2537	8.40346	212.073	764.715	34.914	39.1216	1.60155	-0.102	2	2	2	2	3	3	1	1	2
0	36	67	1.67	126	76	96	24.0238	81	5.28	5.87018	1.26454	4.03413	1.26713	4.60305	4.63265	0.997952	3.18367	3.63265	2.856	67.184	0.2242	8.5897	206.357	695.766	35.285	29.0843	1.8502	0	2	3	2	2	3	2	1	1	2
1	45	69	1.72	142	96	72	23.3234	81	6.05	5.61159	1.03873	3.64624	1.49987	4.11171	3.74138	0.692544	2.43103	2.74138	4.998	107.848	0.413	8.52912	198.928	690.859	32.983	16.6196	0.85415	-0.161	2	2	2	2	1	2	0	0	0
1	60	46	1.65	143	86	87	16.8962	74	4.95	5.7926	0.711302	3.5428	1.91363	3.87898	3.02703	0.371703	1.85135	2.02703	3.213	91.052	0.3894	7.9498	134.322	588.285	21.569	6.40172	0.489656	-0.432	1	1	1	1	1	1	0	0	0
1	59	70	1.7	148	102	92	24.2215	91	4.84	7.2149	2.08874	4.80993	1.44815	5.76674	4.98214	1.44235	3.32143	3.98214	4.998	104.312	0.3776	9.00455	218.103	819.414	35.433	54.3073	1.95895	0.158	3	3	3	2	4	4	2	2	2
1	59	63	1.65	134	90	94	23.1405	79	5.06	5.6633	2.32584	3.23248	1.37057	4.29273	4.13208	1.69699	2.35849	3.13208	3.927	73.372	0.236	9.15652	211.886	723.365	34.772	32.5618	2.04974	0.23	3	4	2	2	3	2	2	2	2
1	59	71	1.66	127	84	74	25.7657	89	5.06	5.06853	2.76617	2.767	1.03439	4.03413	4.9	2.6742	2.675	3.9	4.998	81.328	0.4189	9.3299	240.392	830.361	42.344	66.3882	3.43515	0.427	4	4	4	4	4	4	3	3	3
1	58	66	1.73	128	78	59	22.0522	81	5.555	5.99948	0.711302	3.87898	1.78433	4.21515	3.36232	0.398638	2.17391	2.36232	5.355	83.096	0.3776	8.06511	177.853	653.274	29.058	11.3808	0.506143	-0.398	1	1	1	1	1	1	0	0	0
1	57	76	1.73	137	95	60	25.3934	81	4.73	4.96509	2.15649	2.99974	0.982674	3.98242	5.05263	2.19451	3.05263	4.05263	7.497	121.108	0.4366	9.01347	228.883	730.091	41.142	34.5038	2.58611	0.34	3	4	3	3	3	2	3	3	3
0	57	58	1.54	157	98	102	24.4561	81	7.645	5.55987	1.76132	3.10318	1.65503	3.90484	3.35938	1.06422	1.875	2.35938	3.927	57.46	0.3776	9.29118	227.226	752.586	35.718	40.5103	1.9536	0.025	4	3	3	2	3	3	1	1	2
1	55	83	1.61	126	80	74	32.0204	91	5.445	6.93044	1.52422	5.22369	1.00853	5.9219	6.87179	1.51132	5.17949	5.87179	4.641	110.5	0.3658	8.80725	282.011	801.46	50.764	39.6297	1.7513	0.179	3	3	4	4	3	4	2	2	2
1	55	77	1.72	137	76	72	26.0276	86	5.72	5.50815	1.43389	3.64624	1.21541	4.29273	4.53191	1.17976	3	3.53191	5.712	90.168	0.4484	8.79543	228.924	756.407	39.308	30.1118	1.45624	0.072	3	3	3	3	3	3	2	2	1
1	54	57	1.63	148	83	66	21.4536	76	5.115	4.55133	0.812916	2.99974	1.18955	3.36178	3.82609	0.68338	2.52174	2.82609	3.927	83.096	0.4189	8.11612	174.12	616.825	31.111	8.94208	0.825564	-0.167	1	2	1	1	1	1	0	0	0
1	54	80	1.76	123	92	79	25.8264	84	5.335	4.29273	1.35486	2.45668	1.21541	3.07732	3.53191	1.11473	2.02128	2.53191	3.57	77.792	0.3422	8.66906	223.891	728.201	38.572	25.7424	1.34974	0.045	2	3	3	3	2	2	1	1	1
1	54	94	1.7	156	87	88	32.526	97	15.4	4.55133	1.34357	2.79286	1.13783	3.4135	4	1.18081	2.45455	3	4.998	91.052	0.5369	9.72077	316.177	942.914	56.053	42.9942	1.44478	0.072	4	3	4	4	3	4	2	2	1
1	53	68	1.64	165	104	92	25.2826	81	6.655	5.68916	1.82906	3.85312	1.00853	4.68063	5.64103	1.81359	3.82051	4.64103	6.069	99.008	0.4956	9.19024	232.353	744.409	41.412	29.265	2.14232	0.258	4	4	3	3	3	3	2	2	2
0	52	55	1.58	110	84	86	22.0317	79	5.83	6.87872	0.824207	4.83579	1.65503	5.22369	4.15625	0.498001	2.92188	3.15625	3.927	59.228	0.2183	8.26075	181.999	652.599	29.942	17.3083	0.94384	-0.301	1	1	1	1	1	1	0	0	1
1	51	62	1.7	136	70	56	21.4533	84	4.95	6.28394	1.24196	4.26687	1.44815	4.83579	4.33929	0.857615	2.94643	3.33929	6.069	104.312	0.4248	8.50714	182.506	714.6	30.213	23.5972	1.14512	-0.066	2	2	1	1	2	2	1	1	1
1	51	83	1.72	136	90	60	28.0557	91	5.28	6.25808	1.37744	4.13757	1.49987	4.75821	4.17241	0.918374	2.75862	3.17241	7.14	106.964	0.3599	8.67522	243.389	789.445	39.732	35.8135	1.15002	-0.036	2	2	4	3	3	3	1	1	1
1	50	70	1.7	140	87	73	24.2215	81	5.39	8.35273	2.39359	5.63745	1.62917	6.72356	5.12698	1.46921	3.46032	4.12698	4.998	95.472	0.3481	9.24841	224.01	749.121	35.141	38.2974	1.77615	0.167	4	3	3	2	3	3	2	2	2
1	50	57	1.7	144	79	73	19.7232	79	6.05	6.80114	2.4952	4.60305	1.06025	5.74088	6.41463	2.3534	4.34146	5.41463	3.927	87.516	0.3363	9.4055	185.506	743.034	32.334	34.9328	3.08052	0.371	4	4	1	2	3	3	3	3	3
1	50	59	1.73	136	90	54	19.7133	76	5.28	4.34445	1.03873	2.53426	1.34471	2.99974	3.23077	0.772453	1.88462	2.23077	7.14	84.864	0.3186	8.39299	165.454	637.867	28.179	11.426	0.972953	-0.114	2	2	1	1	1	1	1	1	1
1	50	84	1.61	122	93	73	32.4062	97	6.655	4.03413	1.91939	1.88777	1.26713	2.767	3.18367	1.51475	1.4898	2.18367	6.069	91.052	0.3363	9.23844	299.382	896.129	50.141	61.4203	1.85752	0.179	4	3	4	4	4	4	2	2	2
1	49	80	1.7	148	94	86	27.6817	86	4.51	4.96509	1.41131	3.2842	1.03439	3.9307	4.8	1.36439	3.175	3.8	5.355	104.312	0.3245	8.54189	236.454	734.602	42.519	29.6376	1.62704	0.134	2	3	3	4	3	3	2	2	2
1	49	79	1.76	159	97	65	25.5036	86	7.095	5.37885	1.41131	3.38764	1.34471	4.03413	4	1.04953	2.51923	3	6.069	106.08	0.354	8.99498	229.404	773.568	38.387	29.6376	1.31006	0.021	3	3	3	3	3	3	1	1	1
1	48	73	1.7	145	75	72	25.2595	84	5.885	6.41324	2.74359	3.95656	1.18955	5.22369	5.3913	2.30641	3.32609	4.3913	4.641	80.444	0.4838	9.47274	239.277	795.71	40.408	52.1283	2.82679	0.364	4	4	3	3	4	4	3	3	3
1	48	63	1.68	124	77	69	22.3214	76	5.39	5.7926	0.767754	3.2842	2.14637	3.64624	2.6988	0.3577	1.53012	1.6988	5.355	105.196	0.3245	8.11133	181.056	616.461	28.165	8.4453	0.423487	-0.444	1	1	1	1	1	1	0	0	0
1	48	74	1.76	139	84	63	23.8895	91	5.5	6.10292	1.33228	3.98242	1.49987	4.60305	4.06897	0.888263	2.65517	3.06897	6.069	102.544	0.5015	8.68271	207.425	790.126	33.902	34.6393	1.21531	-0.051	2	2	2	2	3	3	1	1	1
1	46	60	1.68	125	90	95	21.2585	74	5.28	4.83579	1.08389	2.40497	1.93949	2.8963	2.49333	0.558853	1.24	1.49333	4.641	81.328	0.3363	8.43555	179.327	624.231	27.885	9.755	0.660388	-0.252	2	1	1	1	1	1	0	0	0
1	45	80	1.76	147	82	74	25.8264	91	6.105	6.0512	1.94197	4.00828	1.16369	4.88751	5.2	1.6688	3.44444	4.2	4.998	80.444	0.413	9.16388	236.67	833.913	40.552	50.4911	2.18899	0.223	3	4	3	3	4	4	2	2	2
0	45	59	1.58	118	73	76	23.634	71	5.115	5.63745	1.36615	3.59452	1.42229	4.21515	3.96364	0.960528	2.52727	2.96364	4.284	68.068	0.3068	8.63524	204.086	613.102	33.769	17.76	1.57512	-0.018	2	2	2	2	1	1	1	1	2
1	41	63	1.74	140	81	70	20.8086	81	5.225	5.50815	1.85164	3.36178	1.29299	4.21515	4.26	1.43206	2.6	3.26	7.854	105.196	0.3835	8.9606	186.457	725.808	31.222	29.6263	1.87221	0.155	3	3	1	1	3	2	2	2	2
1	40	62	1.7	146	103	70	21.4533	76	4.785	6.64598	2.13391	4.31859	1.34471	5.30127	4.94231	1.58689	3.21154	3.94231	4.284	94.588	0.4897	9.01451	193.391	685.103	31.999	23.473	1.91707	0.201	3	3	2	1	2	2	2	2	2
1	40	65	1.7	140	90	84	22.4913	81	5.555	6.02534	1.09518	3.95656	1.57745	4.44789	3.81967	0.694272	2.5082	2.81967	6.069	99.892	0.3481	8.49668	191.102	688.231	31.186	17.5229	0.872623	-0.161	2	2	1	1	1	2	0	0	0
1	39	69	1.66	129	81	76	25.0399	86	5.61	5.94776	1.20808	4.00828	1.39643	4.55133	4.25926	0.865122	2.87037	3.25926	5.712	107.848	0.3658	8.60465	215.46	740	36.03	25.3698	1.09073	-0.06	2	2	3	2	2	3	1	1	1
1	39	57	1.65	112	84	72	20.9366	74	5.555	6.25808	0.858078	3.72382	2.14637	4.11171	2.91566	0.399782	1.73494	1.91566	4.641	103.428	0.4189	8.25271	172.784	610.7	26.668	7.72271	0.476033	-0.398	1	1	1	1	1	1	0	0	0
1	35	76	1.69	159	89	84	26.6097	86	5.94	5.43057	0.982274	3.25834	1.73261	3.69796	3.13433	0.566933	1.8806	2.13433	6.426	108.732	0.4543	8.45489	224.982	727.121	36.16	20.6278	0.691261	-0.244	2	1	3	2	2	2	0	0	0
1	38	90	1.82	129	84	90	27.1706	94	5.445	4.60305	0.925821	2.87044	1.31885	3.2842	3.4902	0.70199	2.17647	2.4902	8.211	100.776	0.3658	8.30869	225.752	781.017	38.938	26.8488	0.924687	-0.155	1	2	3	3	2	3	0	0	1
1	60	64	1.67	142	95	64	22.9481	81	5.17	6.49082	1.76132	4.42203	1.26713	5.22369	5.12245	1.39	3.4898	4.12245	3.57	106.08	0.3481	8.9	204.238	720.9	34.442	28.1811	1.72897	0.143	3	3	2	2	2	2	2	2	2
1	60	65	1.69	152	84	80	22.7583	89	4.675	3.77554	1.99842	1.62917	1.24127	2.53426	3.04167	1.60998	1.3125	2.04167	6.069	82.212	0.2773	8.92565	203.133	794.383	34.39	47.9621	2.20989	0.207	3	3	2	2	4	3	2	2	2
1	59	85	1.75	145	87	76	27.7551	89	9.68	6.25808	1.34357	4.52547	1.11197	5.14611	5.62791	1.20828	4.06977	4.62791	4.998	95.472	0.3835	9.25646	256.914	823.825	45.427	32.2457	1.4889	0.083	4	3	4	4	3	4	2	2	2
1	59	70	1.7	101	60	66	24.2215	89	5.28	6.15464	1.09518	4.31859	1.34471	4.80993	4.57692	0.814434	3.21154	3.57692	3.927	84.864	0.4071	8.44591	204.572	751.686	34.734	26.2843	1.08183	-0.092	2	2	2	2	2	3	1	1	1
1	60	64	1.64	106	90	88	23.7954	81	6.49	5.32713	2.39359	2.6377	1.60331	3.72382	3.32258	1.4929	1.64516	2.32258	5.355	76.024	0.354	9.43412	224.488	764.164	35.205	38.2974	1.82192	0.173	4	3	3	2	3	3	2	2	2
1	60	60	1.7	103	73	70	20.7612	86	5.885	5.32713	1.44518	3.43936	1.21541	4.11171	4.38298	1.18905	2.82979	3.38298	4.998	82.212	0.3422	8.83171	183.357	759.527	31.461	30.3489	1.65233	0.076	3	3	1	1	3	3	2	2	2
1	58	65	1.65	129	84	64	23.8751	81	5.335	4.80993	1.55809	2.66356	1.42229	3.38764	3.38182	1.09548	1.87273	2.38182	5.355	96.356	0.3599	8.80882	210.312	713.514	34.593	24.9294	1.33454	0.041	3	3	2	2	2	2	1	1	1
1	56	65	1.66	154	93	82	23.5883	89	5.28	6.46496	1.52422	4.37031	1.39643	5.06853	4.62963	1.09151	3.12963	3.62963	3.927	81.328	0.354	8.77648	207.022	781.106	34.241	36.5812	1.47041	0.037	3	3	2	2	3	3	1	1	1
1	56	72	1.69	127	86	106	25.2092	94	24.365	6.85286	1.71616	4.52547	1.55159	5.30127	4.41667	1.10606	2.91667	3.41667	6.783	101.66	0.3658	10.4243	262.788	979.884	42.763	49.7685	1.51865	0.045	4	3	4	4	4	4	1	1	2
1	55	75	1.71	110	75	74	25.6489	86	5.39	6.15464	1.06131	3.90484	1.75847	4.39617	3.5	0.603541	2.22059	2.5	6.783	92.82	0.2891	8.43512	216.352	725.42	34.467	22.2875	0.751018	-0.222	2	2	3	2	2	2	0	0	0
1	53	77	1.67	151	90	66	27.6095	99	6.49	6.10292	4.96782	3.59452	1.11197	4.99095	5.48837	4.46757	3.23256	4.48837	5.355	97.24	0.3481	10.1643	280.631	1006.27	47.834	168.906	6.14205	0.65	4	4	4	4	4	4	3	3	3
1	50	78	1.78	152	103	104	24.6181	84	5.28	4.52547	0.564525	2.22395	2.04293	2.48254	2.21519	0.276332	1.08861	1.21519	4.998	71.604	0.2419	7.78322	191.608	653.791	30.928	10.726	0.343429	-0.553	1	1	1	1	1	1	0	0	0
1	50	73	1.68	156	103	74	25.8645	84	5.885	4.29273	1.86293	1.78433	1.65503	2.6377	2.59375	1.12562	1.07812	1.59375	5.355	99.892	0.5251	9.08563	234.995	763.193	36.92	35.3957	1.36182	0.053	3	3	3	3	3	3	1	1	1
0	51	89	1.55	121	85	72	37.0447	104	7.26	5.84432	1.61454	3.36178	1.73261	4.11171	3.37313	0.931856	1.9403	2.37313	4.641	68.952	0.3658	9.1525	339.052	951.86	52.933	74.2689	1.7061	-0.032	3	2	4	4	4	4	1	1	2
1	47	86	1.8	134	88	70	26.5432	97	5.39	7.29247	1.80648	5.17197	1.29299	5.99948	5.64	1.39713	4	4.64	4.998	82.212	0.3717	8.96699	238.013	869.798	39.857	57.8074	1.92409	0.146	3	3	3	3	4	4	2	2	2
1	49	74	1.75	113	78	60	24.1633	84	4.51	9.25782	0.925821	7.16318	1.68089	7.57693	5.50769	0.550793	4.26154	4.50769	4.641	113.152	0.3599	8.12029	196.213	682.104	31.863	17.5906	0.691411	-0.26	1	1	2	1	1	2	0	0	0
1	50	88	1.67	146	100	68	31.5537	107	5.39	5.87018	7.31625	3.10318	0.827515	5.04267	7.09375	8.84123	3.75	6.09375	5.712	103.428	0.4661	10.3657	327.076	1109.13	61.34	307.282	12.1532	0.946	4	4	4	4	4	4	3	3	3
1	50	64	1.64	112	66	68	23.7954	86	5.115	4.03413	3.81619	1.37057	0.905094	3.12904	4.45714	4.21635	1.51429	3.45714	3.57	80.444	0.3068	9.6625	229.923	830.975	41.915	80.14	5.46321	0.625	4	4	3	4	4	4	3	3	3
1	50	63	1.61	138	88	70	24.3046	84	5.39	5.17197	1.59196	3.25834	1.18955	3.98242	4.34783	1.33829	2.73913	3.34783	5.355	90.168	0.2891	8.84058	214.867	742.609	36.939	30.2473	1.67472	0.127	3	3	3	3	3	3	2	2	2
1	46	77	1.7	138	84	76	26.6436	86	5.225	6.3098	2.63069	4.24101	0.853375	5.45643	7.39394	3.08269	4.9697	6.39394	4.641	113.152	0.3835	9.31177	248.099	800.812	46.075	55.2444	3.75605	0.489	4	4	4	4	4	4	3	3	3
1	44	67	1.78	103	72	82	21.1463	81	5.005	4.05999	1.36615	2.53426	0.905094	3.1549	4.48571	1.5094	2.8	3.48571	4.284	87.516	0.3717	8.6135	182.144	697.694	33.99	21.8584	1.95754	0.179	2	3	1	2	2	2	2	2	2
1	45	68	1.62	140	90	78	25.9107	81	5.94	6.49082	11.0195	2.87044	0.853375	5.63745	7.60606	12.9129	3.36364	6.60606	6.783	99.008	0.3717	10.8724	281.713	880.668	52.49	176.313	15.0497	1.111	4	4	4	4	4	4	3	3	3
1	37	73	1.7	139	92	60	25.2595	86	4.95	5.30127	1.06131	3.49108	1.31885	3.98242	4.01961	0.804721	2.64706	3.01961	4.284	90.168	0.4543	8.34996	210.916	718.096	36.062	22.2875	1.00977	-0.097	1	2	2	2	2	2	1	1	1
1	41	80	1.72	152	101	106	27.0416	91	5.06	4.31859	1.8968	2.01707	1.42229	2.8963	3.03636	1.33363	1.41818	2.03636	2.856	70.72	0.3363	8.95261	242.093	814.687	39.566	49.3169	1.70519	0.124	3	3	4	3	4	4	2	2	2
1	45	77	1.7	154	97	80	26.6436	94	5.225	4.44789	1.98713	2.61184	0.930954	3.51694	4.77778	2.13451	2.80556	3.77778	5.355	101.66	0.2832	9.03121	240.624	848.934	43.88	57.6267	2.84268	0.328	3	4	4	4	4	4	3	3	3
1	40	78	1.71	144	98	92	26.6749	81	19.305	8.14585	9.32596	4.70649	1.06025	7.0856	7.68293	8.79597	4.43902	6.68293	6.426	91.052	0.4248	11.8842	317.01	962.623	52.655	149.215	10.0876	0.944	4	4	4	4	4	4	3	3	3
1	37	72	1.63	195	120	104	27.0993	84	6.765	9.02508	3.3307	6.28394	1.21541	7.80967	7.42553	2.74039	5.17021	6.42553	3.927	89.284	0.3422	9.80601	265.736	823.705	44.297	63.2833	3.2305	0.438	4	4	4	4	4	4	3	3	3
0	38	76	1.75	128	73	60	24.8163	86	5.445	4.18929	0.733883	2.6377	1.21541	2.97388	3.44681	0.603814	2.17021	2.44681	3.57	66.3	0.295	8.07636	200.426	694.567	35.921	20.5487	1.16725	-0.222	1	2	2	2	2	2	0	0	1
1	37	68	1.65	121	81	102	24.977	81	5.5	6.28394	2.05487	4.37031	0.982674	5.30127	6.39474	2.0911	4.44737	5.39474	5.355	104.312	0.4248	9.11603	227.691	738.398	40.828	32.8779	2.48652	0.32	3	4	3	3	3	3	3	3	3
1	36	67	1.69	139	94	85	23.4586	79	4.84	5.87018	1.02744	3.6721	1.73261	4.13757	3.38806	0.592999	2.1194	2.38806	5.712	95.472	0.3245	8.29505	194.59	655.309	31.174	14.3841	0.711155	-0.229	1	2	2	1	1	1	0	0	0
1	57	63	1.7	127	88	67	21.7993	81	5.06	4.75821	1.02744	2.97388	1.31885	3.43936	3.60784	0.779038	2.2549	2.60784	6.426	76.024	0.4248	8.3395	181.795	675.5	31.142	16.439	0.994959	-0.108	1	2	1	1	1	1	1	1	1
1	60	62	1.64	115	87	67	23.0518	81	4.84	4.93923	1.99842	3.23248	0.801655	4.13757	6.16129	2.49287	4.03226	5.16129	3.927	105.196	0.3658	8.96034	206.552	725.787	39.378	31.9747	3.0935	0.396	3	4	2	3	3	2	3	3	3
1	59	77	1.75	168	114	62	25.1429	89	5.335	4.37031	1.20808	2.09465	1.73261	2.6377	2.52239	0.697263	1.20896	1.52239	6.426	114.92	0.4779	8.55439	215.082	761.341	34.123	28.994	0.907733	-0.155	2	2	3	2	3	3	0	0	0
1	59	86	1.76	179	101	75	27.7634	91	6.105	5.55987	0.914531	3.49108	1.65503	3.90484	3.35938	0.552577	2.10938	2.35938	8.211	74.256	0.295	8.41083	233.514	765.386	38.138	23.7778	0.696097	-0.26	2	1	3	3	2	3	0	0	0
1	58	86	1.78	153	88	68	27.143	91	4.51	4.78407	1.51293	3.10318	0.982674	3.8014	4.86842	1.5396	3.15789	3.86842	5.355	89.284	0.3481	8.61141	233.74	783.638	42.443	39.3361	1.96442	0.188	2	3	3	4	3	3	2	2	2
1	56	87	1.75	145	91	69	28.4082	91	5.94	5.94776	3.83877	3.10318	1.08611	4.86165	5.47619	3.53441	2.85714	4.47619	4.284	80.444	0.3481	9.81793	278.909	893.432	48.044	99.8081	4.39442	0.548	4	4	4	4	4	4	3	3	3
1	55	76	1.73	140	61	63	25.3934	86	5.39	7.00802	3.94039	4.34445	0.853375	6.15464	8.21212	4.61742	5.09091	7.21212	5.712	99.008	0.4602	9.74689	247.507	838.233	45.753	82.7481	5.77727	0.665	4	4	4	4	4	4	3	3	3
1	54	57	1.68	146	92	69	20.1956	81	7.48	3.59452	0.711302	1.62917	1.62917	1.96535	2.20635	0.436604	1	1.20635	3.57	78.676	0.2832	8.36264	168.888	677.374	28.347	11.3808	0.579266	-0.357	2	1	1	1	1	1	0	0	0
1	53	80	1.67	148	82	99	28.6851	86	5.555	4.73235	1.84035	2.79286	1.08611	3.64624	4.35714	1.69444	2.57143	3.35714	3.927	92.82	0.3009	9.01572	258.617	775.352	45.287	38.6474	1.97991	0.228	3	4	4	4	3	3	2	2	2
1	53	70	1.65	127	77	75	25.7117	90	4.785	5.14611	2.34842	3.1549	0.905094	4.24101	5.68571	2.59467	3.48571	4.68571	4.641	75.14	0.472	9.1103	234.241	819.927	42.993	58.7106	3.37434	0.413	3	4	3	4	4	4	3	3	3
1	53	69	1.68	155	111	78	24.4473	84	5.335	5.9219	0.632268	3.62038	2.01707	3.90484	2.9359	0.313459	1.79487	1.9359	6.426	85.748	0.3363	7.90692	193.303	664.181	30.987	12.0131	0.391033	-0.509	1	1	2	1	1	1	0	0	0
1	52	75	1.66	157	111	80	27.2173	86	5.775	6.4391	1.59196	4.37031	1.34471	5.09439	4.78846	1.18387	3.25	3.78846	4.998	112.268	0.4484	8.90957	242.495	766.223	40.375	33.4312	1.42534	0.072	3	3	4	3	3	3	2	2	1
1	52	65	1.71	161	102	94	22.2291	81	8.91	4.37031	2.23552	1.62917	1.70675	2.66356	2.56061	1.30981	0.954545	1.56061	6.069	79.56	0.4012	9.68272	215.238	784.3	33.203	35.7683	1.65625	0.117	4	3	3	2	3	3	2	2	2
1	51	88	1.75	135	90	82	28.7347	91	6.49	5.7926	2.82263	3.18076	1.31885	4.47375	4.39216	2.14021	2.41176	3.39216	6.069	83.98	0.3894	9.599	275.824	873.509	45.203	73.3883	2.64355	0.33	4	4	4	4	4	4	3	3	3
1	50	77	1.73	133	90	74	25.7276	107	5.335	6.10292	0.824207	4.29273	1.42229	4.68063	4.29091	0.579492	3.01818	3.29091	4.641	86.632	0.3599	8.17202	210.246	874.406	35.874	34.6167	0.895668	-0.237	1	1	2	2	3	4	0	0	0
1	50	81	1.73	130	93	62	27.0641	84	5.005	7.75795	1.25325	5.74088	1.44815	6.3098	5.35714	0.865411	3.96429	4.35714	5.355	113.152	0.4366	8.52724	230.782	716.288	38.184	23.8117	1.02093	-0.06	2	2	3	3	2	2	1	1	1
0	50	51	1.62	117	87	69	19.433	76	4.565	4.86165	1.46777	2.8963	1.29299	3.56866	3.76	1.13517	2.24	2.76	4.641	68.068	0.2596	8.59323	166.992	653.085	28.263	26.4198	2.20841	0.057	2	3	1	1	2	1	1	1	2
1	50	82	1.73	106	82	65	27.3982	84	5.005	4.62891	0.914531	3.07732	1.13783	3.49108	4.06818	0.803748	2.70455	3.06818	4.284	89.284	0.4543	8.21216	224.998	689.822	40.346	17.3761	0.941657	-0.097	1	2	3	3	1	2	1	1	1
1	49	64	1.65	130	86	78	23.5078	81	5.39	4.03413	1.0726	2.27567	1.26713	2.767	3.18367	0.846477	1.79592	2.18367	4.284	92.82	0.4189	8.4457	198.54	684.101	34.272	17.1616	1.03969	-0.071	2	2	2	2	1	2	1	1	1
1	48	74	1.75	147	99	62	24.1633	86	4.62	5.63745	1.03873	3.87898	1.29299	4.34445	4.36	0.803351	3	3.36	4.641	103.428	0.3776	8.25946	199.575	710.313	34.342	21.8133	1.03246	-0.097	1	2	2	2	2	2	1	1	1
1	48	61	1.62	120	79	81	23.2434	84	5.28	6.3098	0.767754	4.24101	1.70675	4.60305	3.69697	0.449834	2.48485	2.69697	5.355	92.82	0.3186	8.09071	188.056	679.62	30.845	14.5873	0.57639	-0.347	1	1	1	1	1	2	0	0	0
1	48	54	1.62	121	80	78	20.5761	76	4.95	4.96509	1.00485	2.32739	2.17223	2.79286	2.28571	0.462592	1.07143	1.28571	4.284	92.82	0.3068	8.2953	170.685	630.443	25.986	11.0534	0.570603	-0.337	1	1	1	1	1	1	0	0	0
1	48	88	1.7	149	111	80	30.4498	91	6.49	6.38738	5.99526	3.69796	1.06025	5.32713	6.02439	5.65455	3.4878	5.02439	4.284	99.892	0.3776	10.3523	315.226	942.059	54.466	155.877	6.75204	0.752	4	4	4	4	4	4	3	3	3
1	46	85	1.85	124	94	85	24.8356	86	5.06	8.35273	1.77261	6.07706	1.47401	6.87872	5.66667	1.20258	4.12281	4.66667	6.426	109.616	0.5192	8.88489	220.662	764.1	35.83	37.2248	1.52292	0.079	3	3	3	2	3	3	2	2	2
1	45	83	1.75	140	88	88	27.102	86	5.005	3.31006	2.16778	1.39643	0.930954	2.37911	3.55556	2.32855	1.5	2.55556	4.998	77.792	0.3245	9.07521	245.957	780.468	44.802	45.5233	2.8102	0.367	3	4	4	4	3	3	3	3	3
1	44	60	1.73	114	76	62	20.0474	76	5.39	3.8014	0.90324	2.22395	1.16369	2.6377	3.26667	0.776185	1.91111	2.26667	4.641	103.428	0.2773	8.27385	165.869	628.812	29.603	9.93564	0.969716	-0.108	1	2	1	1	1	1	1	1	1
1	44	91	1.68	150	92	84	32.2421	97	4.84	4.93923	1.87422	3.12904	0.956814	3.98242	5.16216	1.95882	3.27027	4.16216	5.712	108.732	0.4366	8.89618	286.831	862.929	52.096	59.9752	2.40946	0.292	3	4	4	4	4	4	3	3	2
1	44	61	1.67	150	92	62	21.8724	79	6.05	5.45643	1.37744	3.74968	1.08611	4.37031	5.02381	1.26823	3.45238	4.02381	5.712	104.312	0.354	8.81135	192.726	696.097	34.141	19.2842	1.57706	0.104	3	3	2	2	2	2	2	2	2
1	43	72	1.64	124	97	99	26.7698	84	5.72	7.13732	3.70329	4.24101	1.18955	5.94776	6	3.11318	3.56522	5	4.284	83.98	0.3835	9.74426	260.852	818.518	43.939	70.3624	3.69521	0.493	4	4	4	4	4	4	3	3	3
0	40	52	1.65	117	79	71	19.1001	81	4.015	4.16343	0.970983	2.09465	1.62917	2.53426	2.55556	0.595999	1.28571	1.55556	3.57	54.808	0.3009	8.05166	153.787	652.184	25.11	22.3326	1.24646	-0.222	1	2	1	1	2	1	0	0	1
1	39	67	1.75	128	85	66	21.8776	81	4.84	4.55133	1.15163	2.35325	1.68089	2.87044	2.70769	0.685132	1.4	1.70769	4.641	91.936	0.3127	8.40916	183.972	681.142	29.497	18.4261	0.873433	-0.161	2	2	1	1	2	2	0	0	0
1	38	85	1.73	165	92	100	28.4005	86	7.92	3.62038	1.26454	1.62917	1.42229	2.19809	2.54545	0.889084	1.14545	1.54545	4.641	111.384	0.4897	8.99516	255.468	773.584	42.462	26.5553	1.04484	-0.051	3	2	4	4	2	3	1	1	1
1	60	88	1.72	184	105	77	29.7458	102	9.68	6.4391	2.39359	4.24101	1.11197	5.32713	5.7907	2.15256	3.81395	4.7907	3.57	84.864	0.3068	9.83392	292.518	1003.06	50.108	88.5627	2.92093	0.332	4	4	4	4	4	4	3	3	3
1	55	83	1.72	159	106	56	28.0557	91	5.665	6.74942	1.55809	4.78407	1.24127	5.50815	5.4375	1.25524	3.85417	4.4375	5.712	84.864	0.4012	8.86884	248.821	807.064	42.335	40.5103	1.57186	0.1	3	3	4	4	3	4	2	2	2
1	52	58	1.78	168	95	70	18.3058	79	5.39	4.37031	0.722592	1.65503	2.37911	1.99121	1.83696	0.303724	0.695652	0.836957	4.641	105.196	0.4779	8.0507	147.374	636.006	22.517	10.1163	0.411863	-0.523	1	1	1	1	1	1	0	0	0
1	51	67	1.75	157	105	79	21.8776	81	5.17	4.70649	1.82906	2.8963	0.982674	3.72382	4.78947	1.86131	2.94737	3.78947	3.57	91.052	0.354	8.93774	195.536	723.957	35.235	29.265	2.37287	0.27	3	4	2	2	3	2	2	2	2
1	52	82	1.68	166	100	94	29.0533	91	7.26	3.43936	1.84035	1.65503	0.930954	2.5084	3.69444	1.97685	1.77778	2.69444	4.998	99.892	0.3009	9.2834	269.713	844.79	49.1	47.8492	2.42625	0.297	4	4	4	4	4	4	3	3	2
1	50	65	1.67	149	91	56	23.3067	81	5.775	3.95656	0.948402	2.61184	0.905094	3.05146	4.37143	1.04785	2.88571	3.37143	4.641	106.08	0.3304	8.39163	195.581	679.722	37.263	15.1744	1.29285	0.021	2	3	2	3	1	2	1	1	1
1	51	79	1.7	158	92	74	27.3356	86	8.8	6.74942	1.85164	4.26687	1.62917	5.12025	4.14286	1.13656	2.61905	3.14286	3.57	67.184	0.3658	9.48189	259.194	815.443	40.795	38.8845	1.36503	0.057	4	3	4	3	3	4	1	1	1
1	50	63	1.65	159	110	98	23.1405	81	5.445	5.53401	1.00485	3.74968	1.31885	4.21515	4.19608	0.761916	2.84314	3.19608	4.641	83.98	0.3894	8.39061	194.163	679.639	33.308	16.0777	0.943596	-0.119	2	2	2	2	1	2	1	1	1
1	49	88	1.7	144	102	82	30.4498	91	4.07	6.80114	1.94197	4.73235	1.18955	5.61159	5.71739	1.63252	3.97826	4.71739	3.57	76.908	0.3717	8.75841	266.692	797.016	45.877	50.4911	1.94937	0.212	3	3	4	4	4	4	2	2	2
1	46	76	1.8	146	95	86	23.4568	84	5.5	6.02534	2.95811	3.33592	1.34471	4.68063	4.48077	2.19981	2.48077	3.48077	7.14	94.588	0.3835	9.48037	222.379	796.351	36.429	56.2041	2.80521	0.342	4	4	3	2	4	4	3	3	3
1	46	70	1.65	123	71	66	25.7117	84	5.83	6.64598	2.03229	4.70649	1.00853	5.63745	6.58974	2.01509	4.66667	5.58974	5.355	105.196	0.531	9.16325	235.602	769.713	41.905	38.6135	2.44589	0.305	3	4	3	4	3	3	3	3	2
1	46	54	1.65	133	84	80	19.8347	74	5.39	4.93923	0.90324	2.99974	1.52573	3.4135	3.23729	0.592005	1.9661	2.23729	4.641	89.284	0.354	8.27385	164.109	612.265	27.333	8.12916	0.723892	-0.229	1	2	1	1	1	1	0	0	0
1	58	64	1.77	141	79	60	20.4284	81	5.5	5.09439	1.75003	3.12904	1.16369	3.9307	4.37778	1.50386	2.68889	3.37778	4.998	76.908	0.4189	8.95545	182.945	725.391	31.515	28.0005	1.98407	0.176	3	3	1	1	2	2	2	2	2
1	59	51	1.65	138	92	90	18.7328	71	5.005	4.88751	1.49035	3.25834	0.956814	3.9307	5.10811	1.55761	3.40541	4.10811	6.783	86.632	0.236	8.70051	162.985	617.737	29.822	8.94208	1.87795	0.193	2	3	1	1	1	1	2	2	2
1	53	69	1.66	118	81	71	25.0399	81	4.95	5.12025	1.76132	3.20662	1.11197	4.00828	4.60465	1.58396	2.88372	3.60465	4.998	76.024	0.3363	8.85652	221.767	717.378	38.727	28.1811	1.88091	0.199	3	3	3	3	2	2	2	2	2
1	56	75	1.72	109	76	61	25.3515	86	4.29	4.68063	1.8968	2.767	1.03439	3.64624	4.525	1.83374	2.675	3.525	6.069	109.616	0.4543	8.78753	222.777	755.727	39.725	39.8329	2.29642	0.262	3	4	3	3	3	3	2	2	2
1	54	78	1.73	121	79	86	26.0617	89	5.39	7.39591	1.33228	5.40471	1.37057	6.02534	5.39623	0.972061	3.9434	4.39623	6.069	94.588	0.4012	8.6625	225.759	770.963	37.738	31.9747	1.24083	-0.013	2	3	3	3	3	3	1	1	1
1	53	70	1.7	142	82	118	24.2215	81	9.24	4.70649	2.33713	2.04293	1.60331	3.10318	2.93548	1.45769	1.27419	1.93548	5.355	78.676	0.3835	9.76354	236.487	790.846	36.954	37.3942	1.76223	0.164	4	3	3	3	3	3	2	2	2
1	60	68	1.67	120	92	62	24.3824	84	5.06	6.33566	1.32099	3.85312	1.88777	4.44789	3.35616	0.699762	2.0411	2.35616	4.641	70.72	0.3127	8.59082	209.464	721.628	32.43	25.0988	0.874182	-0.155	2	2	2	2	2	2	0	0	0
1	55	65	1.65	149	90	52	23.8751	79	5.005	6.64598	6.69527	3.87898	0.956814	5.68916	6.94595	6.99746	4.05405	5.94595	4.284	79.56	0.413	10.2029	243.596	806.03	43.997	93.7338	8.314	0.845	4	4	4	4	4	4	3	3	3
1	56	78	1.67	136	85	76	27.968	89	4.675	5.53401	1.33228	3.64624	1.26713	4.26687	4.36735	1.05141	2.87755	3.36735	6.426	110.5	0.3835	8.52019	238.293	758.297	40.699	31.9747	1.28999	0.021	2	3	3	3	3	3	1	1	1
1	53	72	1.67	137	89	78	25.8166	86	4.62	5.12025	1.98713	3.25834	0.956814	4.16343	5.35135	2.07682	3.40541	4.35135	6.426	112.268	0.5369	8.90815	229.979	766.101	41.764	41.7297	2.57506	0.318	3	4	3	4	3	3	3	3	3
1	54	68	1.65	115	94	68	24.977	84	6.765	4.34445	1.16292	2.66356	1.13783	3.20662	3.81818	1.02205	2.34091	2.81818	5.712	86.632	0.3422	8.75377	218.643	735.316	38.65	22.0955	1.26033	0.009	3	3	3	3	2	3	1	1	1
1	59	74	1.64	140	93	68	27.5134	91	5.995	4.47375	1.8968	2.17223	1.42229	3.05146	3.14545	1.33363	1.52727	2.14545	3.57	91.936	0.3894	9.12216	250.982	830.117	40.886	49.3169	1.68865	0.124	3	3	4	3	4	4	2	2	2
1	60	70	1.68	159	89	79	24.8016	86	5.28	6.46496	1.47906	4.44789	1.34471	5.12025	4.80769	1.09991	3.30769	3.80769	3.213	70.72	0.2773	8.7464	216.925	752.19	36.263	31.0602	1.39393	0.041	3	3	3	2	3	3	1	1	1
1	52	83	1.61	136	90	73	32.0204	84	5.39	4.39617	1.0726	2.8963	1.00853	3.38764	4.35897	1.06352	2.87179	3.35897	6.069	99.008	0.3894	8.4457	270.434	709.439	49.586	20.3794	1.1376	0.025	2	3	4	4	2	2	1	1	1
1	51	66	1.68	118	80	89	23.3844	84	4.51	4.65477	1.63712	2.8963	1.00853	3.64624	4.61538	1.62327	2.87179	3.61538	4.998	99.892	0.413	8.69031	203.217	729.986	36.589	31.1053	2.07337	0.21	2	3	2	2	3	2	2	2	2
1	60	75	1.7	138	110	108	25.9516	84	16.775	6.41324	3.61296	3.43936	1.31885	5.09439	4.86275	2.73947	2.60784	3.86275	5.355	90.168	0.4602	10.7955	280.16	906.821	45.112	68.6463	3.30819	0.438	4	4	4	4	4	4	3	3	3
1	46	58	1.7	120	79	82	20.0692	76	4.62	6.02534	1.93068	3.74968	1.39643	4.62891	4.31481	1.38258	2.68519	3.31481	3.213	70.72	0.4307	8.87933	178.201	674.829	29.313	21.2374	1.72639	0.14	3	3	1	1	2	1	2	2	2
0	39	54	1.55	118	86	83	22.4766	76	4.73	4.13757	0.700011	2.22395	1.60331	2.53426	2.58065	0.436604	1.3871	1.58065	6.069	63.648	0.2655	7.88833	177.303	599.513	29.714	12.6002	0.787587	-0.357	1	1	1	1	1	1	0	0	0
1	51	79	1.76	120	96	64	25.5036	86	5.335	5.9219	2.1452	4.05999	0.879235	5.04267	6.73529	2.43984	4.61765	5.73529	3.57	95.472	0.3481	9.12859	232.812	785.059	43.031	45.0491	3.04549	0.387	3	4	3	4	3	3	3	3	3
1	55	54	1.62	161	92	63	20.5761	81	4.95	5.48229	1.91939	3.69796	0.905094	4.57719	6.05714	2.12065	4.08571	5.05714	3.57	93.704	0.4012	8.94246	184.001	724.339	33.908	30.7102	2.78789	0.326	3	4	1	2	3	2	3	3	3
1	43	70	1.63	152	104	71	26.3465	86	5.115	6.74942	2.32584	4.73235	0.956814	5.7926	7.05405	2.43082	4.94595	6.05405	4.284	111.384	0.4248	9.16733	241.527	788.39	43.574	48.8427	2.98034	0.386	3	4	4	4	4	3	3	3	3
0	45	70	1.56	124	73	83	28.764	89	5.335	4.91337	0.858078	3.07732	1.44815	3.46522	3.39286	0.592534	2.125	2.39286	4.998	68.952	0.3127	8.2123	236.218	730.894	39.999	26.6004	1.08815	-0.229	1	2	3	3	2	2	0	0	1
1	53	65	1.68	141	91	86	23.03	84	4.675	6.10292	1.28712	4.00828	1.49987	4.60305	4.06897	0.858152	2.67241	3.06897	4.641	97.24	0.3127	8.4857	195.426	712.799	32.04	24.4552	1.1049	-0.066	2	2	2	1	2	2	1	1	1
1	42	80	1.66	129	87	74	29.0318	86	4.84	5.50815	2.2581	3.49108	0.982674	4.52547	5.60526	2.29791	3.55263	4.60526	6.069	114.92	0.4838	9.08251	263.681	781.096	47.321	47.4201	2.66649	0.362	3	4	4	4	4	3	3	3	3
1	58	68	1.64	129	88	62	25.2826	86	4.895	4.47375	1.20808	2.48254	1.44815	3.0256	3.08929	0.834225	1.71429	2.08929	3.57	74.256	0.295	8.46832	214.101	728.275	35.499	25.3698	1.04627	-0.081	2	2	2	2	2	2	1	1	1
1	48	77	1.81	124	82	87	23.5036	84	5.665	5.09439	2.95811	2.56012	1.18955	3.90484	4.28261	2.48674	2.15217	3.28261	5.712	84.864	0.4012	9.50993	223.517	798.834	37.739	56.2041	3.16778	0.396	4	4	3	3	4	4	3	3	3
1	50	80	1.63	135	102	80	30.1103	89	6.05	3.25834	1.38873	1.55159	1.06025	2.19809	3.07317	1.30981	1.46341	2.07317	4.641	98.124	0.3186	8.81952	265.558	784.937	47.333	33.3296	1.5398	0.117	3	3	4	4	3	3	2	2	2
1	58	55	1.64	100	76	80	20.4491	74	7.48	4.62891	1.68229	2.37911	1.47401	3.1549	3.14035	1.1413	1.61404	2.14035	3.213	92.82	0.236	9.22345	188.612	682.536	30.564	15.1406	1.37492	0.057	4	3	1	1	1	2	1	1	1
1	37	73	1.72	118	93	76	24.6755	86	4.675	6.07706	1.62583	3.82726	1.49987	4.57719	4.05172	1.08398	2.55172	3.05172	4.641	97.24	0.4012	8.71932	215.154	749.861	34.946	34.1425	1.37754	0.033	2	3	3	2	3	3	1	1	1
1	55	81	1.68	138	91	78	28.699	86	6.49	4.31859	1.82906	2.32739	1.16369	3.1549	3.71111	1.57177	2	2.71111	4.641	91.052	0.3658	9.16513	263.03	788.202	45.134	38.4103	1.83607	0.196	3	3	4	4	3	3	2	2	2
1	59	75	1.72	157	111	82	25.3515	89	6.16	5.01681	4.66298	2.87044	0.801655	4.21515	6.25806	5.81669	3.58065	5.25806	3.927	93.704	0.3835	10.0488	254.753	894.343	47.664	111.911	7.53845	0.765	4	4	4	4	4	4	3	3	3
0	38	53	1.53	127	67	74	22.6409	71	4.62	6.51668	1.02744	4.68063	1.37057	5.14611	4.75472	0.749641	3.41509	3.75472	3.927	68.952	0.3304	8.24853	186.754	585.646	31.687	13.3567	1.25837	-0.125	1	2	1	1	1	1	1	1	1
1	35	63	1.67	105	67	69	22.5896	79	5.005	3.98242	0.632268	1.68089	2.01707	1.96535	1.97436	0.313459	0.833333	0.974359	3.927	78.676	0.354	7.84306	177.171	619.602	28.374	8.85176	0.383392	-0.509	1	1	1	1	1	1	0	0	0
1	51	82	1.7	126	91	80	28.3737	97	19.58	6.64598	3.02586	4.05999	1.18955	5.45643	5.58696	2.54369	3.41304	4.58696	4.284	70.72	0.2124	10.7728	305.663	1044.96	51.036	96.8274	3.37351	0.405	4	4	4	4	4	4	3	3	3
1	44	104	1.7	135	85	86	35.9862	107	4.84	5.53401	1.49035	3.46522	1.39643	4.13757	3.96296	1.06725	2.48148	2.96296	4.284	73.372	0.4484	8.66699	311.892	927.368	51.699	62.5946	1.35316	0.029	2	3	4	4	4	4	1	1	1
1	52	75	1.74	122	89	64	24.7721	84	4.95	5.48229	1.24196	3.12904	1.78433	3.69796	3.07246	0.696035	1.75362	2.07246	4.284	81.328	0.2773	8.50714	210.74	714.6	33.169	23.5972	0.86214	-0.155	2	2	2	2	2	2	0	0	0
1	47	84	1.73	137	94	71	28.0664	86	5.06	6.4391	1.69358	4.49961	1.16369	5.27541	5.53333	1.45535	3.86667	4.53333	4.284	87.516	0.4838	8.83928	248.087	760.178	42.851	35.5651	1.72193	0.164	3	3	4	4	3	3	2	2	2
1	50	80	1.75	143	92	77	26.1224	86	6.38	6.5684	1.55809	4.91337	0.930954	5.63745	7.05556	1.67365	5.27778	6.05556	4.641	79.56	0.3481	8.9877	234.781	772.942	43.103	32.7199	2.06173	0.223	3	4	3	4	3	3	2	2	2
1	49	74	1.68	142	91	62	26.2188	86	6.27	5.76674	3.21779	3.51694	0.775795	4.99095	7.43333	4.14774	4.53333	6.43333	5.712	102.544	0.4307	9.69554	254.206	833.816	48.107	67.5737	5.0991	0.618	4	4	4	4	4	4	3	3	3
1	46	77	1.76	139	90	80	24.858	86	5.28	6.33566	2.94682	4.16343	0.827515	5.50815	7.65625	3.56105	5.03125	6.65625	3.927	83.98	0.4189	9.43572	234.553	811.472	43.87	61.8833	4.50746	0.551	4	4	3	4	4	4	3	3	3
1	50	82	1.71	141	97	77	28.0428	86	4.84	5.27541	1.68229	3.07732	1.42229	3.85312	3.70909	1.1828	2.16364	2.70909	3.927	91.052	0.4248	8.78814	246.444	755.78	40.47	35.328	1.40013	0.072	3	3	4	3	3	3	2	2	1
1	52	69	1.74	139	86	62	22.7903	81	4.95	5.30127	0.779045	3.36178	1.57745	3.72382	3.36066	0.493863	2.13115	2.36066	6.783	105.196	0.5015	8.04077	183.252	651.302	30.588	12.4647	0.616504	-0.31	1	1	1	1	1	1	0	0	0
1	45	77	1.68	118	84	86	27.2817	89	6.6	4.73235	1.43389	2.81872	1.26713	3.46522	3.73469	1.13161	2.22449	2.73469	5.712	74.256	0.5133	8.93853	243.859	795.529	41.394	34.4135	1.40806	0.053	3	3	4	3	3	4	1	1	1
1	44	70	1.67	123	78	71	25.0995	81	5.005	4.88751	1.25325	3.05146	1.26713	3.62038	3.85714	0.989041	2.40816	2.85714	3.57	99.008	0.3127	8.52724	214.03	690.707	36.634	20.0519	1.17295	-0.004	2	3	2	2	2	2	1	1	1
1	47	70	1.68	136	89	73	24.8016	97	4.785	6.74942	1.63712	5.01681	0.982674	5.76674	6.86842	1.66599	5.10526	5.86842	4.641	84.864	0.3894	8.74949	217.001	848.701	39.305	52.3879	2.3814	0.223	3	4	3	3	4	4	2	2	2
1	46	69	1.76	114	84	60	22.2753	84	4.51	6.33566	1.41131	4.80993	0.879235	5.45643	7.20588	1.60516	5.47059	6.20588	3.927	77.792	0.4425	8.54189	190.273	717.518	35.801	26.8149	2.10265	0.207	2	3	1	2	2	2	2	2	2
1	50	68	1.69	134	92	63	23.8087	81	5.115	6.20636	1.44518	3.8014	1.73261	4.47375	3.58209	0.834109	2.19403	2.58209	4.641	99.892	0.3599	8.69148	206.933	704.01	32.557	23.123	1.01763	-0.081	2	2	2	2	2	2	1	1	1
1	41	65	1.65	130	85	70	23.8751	76	5.39	4.57719	1.32099	3.0256	0.956814	3.62038	4.78378	1.38061	3.16216	3.78378	7.14	83.096	0.3776	8.65399	206.615	657.704	38.001	14.5309	1.57807	0.14	2	3	2	3	1	1	2	2	2
1	40	81	1.8	135	81	78	25	86	4.565	3.2842	0.869369	1.75847	1.13783	2.14637	2.88636	0.764057	1.54545	1.88636	4.998	76.908	0.3835	8.0695	201.737	693.977	36.29	18.2567	0.964138	-0.119	1	2	2	2	2	2	1	1	1
1	44	73	1.7	138	80	69	25.2595	86	5.39	7.2149	2.021	4.91337	1.37057	5.84432	5.26415	1.47457	3.58491	4.26415	6.069	90.168	0.3776	9.07921	229.336	780.812	37.709	42.441	1.85029	0.167	3	3	3	3	3	3	2	2	2
1	38	82	1.8	131	87	75	25.3086	81	5.555	5.53401	0.609687	4.11171	1.13783	4.39617	4.86364	0.535832	3.61364	3.86364	4.284	106.08	0.354	7.91096	200.216	640.788	37.088	9.755	0.632603	-0.268	1	1	2	3	1	1	0	0	0
1	35	84	1.79	117	73	78	26.2164	86	4.895	5.53401	1.96455	3.5428	1.08611	4.44789	5.09524	1.80879	3.2619	4.09524	3.213	76.908	0.4543	8.95454	234.756	770.091	41.134	41.2555	2.22378	0.258	3	4	3	3	3	3	2	2	2
1	36	79	1.74	148	72	78	26.0933	86	6.6	5.50815	3.13876	2.94802	1.11197	4.39617	4.95349	2.82269	2.65116	3.95349	4.284	75.14	0.3658	9.72197	253.678	836.089	43.354	65.914	3.47936	0.45	4	4	4	4	4	4	3	3	3
0	58	62	1.6	113	81	66	24.2187	79	4.95	5.55987	0.654849	3.51694	1.73261	3.82726	3.20896	0.377956	2.02985	2.20896	6.069	54.808	0.2596	7.86711	190.531	621.501	31.522	13.7518	0.680369	-0.42	1	1	1	1	1	1	0	0	0
1	54	68	1.65	127	88	61	24.977	81	4.125	6.62012	4.5162	5.14611	0.775795	5.84432	8.53333	5.82138	6.63333	7.53333	3.57	77.792	0.295	9.61581	240.174	778.88	46.343	72.2592	6.92218	0.765	4	4	4	4	4	3	3	3	3
1	50	62	1.65	132	89	74	22.7732	79	4.565	4.70649	1.91939	2.53426	1.29299	3.4135	3.64	1.48445	1.96	2.64	7.497	92.82	0.3009	8.86149	201.804	700.058	33.859	26.8714	1.80804	0.17	3	3	2	2	2	2	2	2	2
1	47	90	1.8	134	85	63	27.7778	91	5.115	4.70649	2.22423	2.58598	1.11197	3.59452	4.23256	2.00025	2.32558	3.23256	4.284	83.98	0.3717	9.12266	253.407	830.162	43.932	57.83	2.51904	0.301	3	4	4	4	4	4	3	3	3
1	39	78	1.8	141	90	76	24.0741	86	5.115	4.39617	0.745173	2.5084	1.55159	2.84458	2.83333	0.480264	1.61667	1.83333	4.641	76.908	0.3363	8.02911	193.293	690.503	32.507	15.6486	0.61845	-0.319	1	1	2	2	1	2	0	0	0
1	39	74	1.63	133	86	88	27.852	84	6.16	5.14611	0.982274	3.46522	1.24127	3.90484	4.14583	0.791344	2.79167	3.14583	4.998	70.72	0.3009	8.49126	236.499	713.266	41.293	18.6632	0.918531	-0.102	2	2	3	3	2	2	1	1	0
1	38	69	1.69	116	67	71	24.1588	81	4.51	3.59452	1.01615	2.19809	0.930954	2.66356	3.86111	1.09151	2.36111	2.86111	3.927	72.488	0.413	8.21338	198.426	665.284	37.333	16.2583	1.32137	0.037	1	3	2	3	1	1	1	1	1
1	52	76	1.7	125	93	62	26.2976	84	5.005	4.80993	0.620978	3.31006	1.21541	3.59452	3.95745	0.510919	2.7234	2.95745	6.069	101.66	0.4602	7.82505	205.78	657.304	37.352	11.7986	0.612482	-0.292	1	1	2	3	1	1	0	0	0
1	42	79	1.74	108	76	62	26.0933	81	4.4	5.87018	1.67099	3.95656	1.13783	4.73235	5.15909	1.46858	3.47727	4.15909	4.641	102.544	0.3658	8.68609	226.649	703.573	39.506	26.7359	1.70498	0.167	2	3	3	3	2	2	2	2	2
1	37	69	1.7	125	91	78	23.8754	81	5.445	6.1805	0.598397	4.08585	1.81019	4.37031	3.41429	0.330571	2.25714	2.41429	4.641	79.56	0.3245	7.87226	187.954	637.653	31.058	9.57435	0.402707	-0.481	1	1	1	1	1	1	0	0	0
1	39	70	1.7	121	81	72	24.2215	81	5.94	6.85286	2.021	4.80993	1.11197	5.74088	6.16279	1.81749	4.32558	5.16279	4.998	88.4	0.3422	9.17637	222.265	743.286	38.501	32.336	2.19719	0.26	3	4	3	3	3	3	2	2	2
1	38	75	1.73	150	101	76	25.0593	79	5.225	5.48229	3.45489	2.92216	0.982674	4.49961	5.57895	3.51581	2.97368	4.57895	4.284	93.704	0.4189	9.58431	240.176	757.161	42.758	48.3685	4.07014	0.547	4	4	4	4	4	3	3	3	3
1	57	60	1.67	163	106	60	21.5139	76	4.62	4.24101	1.37744	1.88777	1.73261	2.5084	2.44776	0.79501	1.08955	1.44776	7.14	113.152	0.5133	8.54169	183.765	649.168	29.005	15.1519	0.959062	-0.097	2	2	1	1	1	1	1	1	1
1	39	81	1.74	135	100	88	26.7539	84	4.73	6.93044	0.835497	5.19783	1.34471	5.58573	5.15385	0.621321	3.86538	4.15385	4.998	92.82	0.3363	8.06527	215.777	677.482	37.271	15.8744	0.737728	-0.208	1	2	3	3	1	1	0	0	0
1	48	62	1.66	153	99	66	22.4996	76	5.555	4.13757	0.767754	2.56012	1.21541	2.92216	3.40426	0.631682	2.10638	2.40426	4.998	79.56	0.3599	8.14148	183.18	618.753	32.717	8.4453	0.744804	-0.201	1	2	1	2	1	1	0	0	0
1	38	84	1.75	114	78	83	27.4286	91	4.565	7.44763	2.67585	5.17197	1.06025	6.38738	7.02439	2.52378	4.87805	6.02439	4.284	73.372	0.4071	9.19375	252.172	836.632	44.311	69.5721	3.20122	0.401	4	4	4	4	4	4	3	3	3
1	49	77	1.7	151	109	69	26.6436	91	5.665	5.45643	1.27583	3.46522	1.39643	4.05999	3.90741	0.913634	2.48148	2.90741	4.641	108.732	0.4543	8.66897	230.973	788.876	38.502	33.1715	1.17792	-0.041	2	2	3	3	3	3	1	1	1
1	36	85	1.7	114	83	99	29.4118	86	8.855	5.22369	0.925821	3.64624	1.16369	4.05999	4.48889	0.795589	3.13333	3.48889	3.927	70.72	0.3363	8.79498	258.676	756.368	46.366	19.4422	0.916255	-0.097	3	2	4	4	2	3	1	1	0
1	41	78	1.62	135	93	93	29.7211	97	4.235	6.51668	2.6194	4.42203	0.905094	5.61159	7.2	2.89406	4.88571	6.2	3.927	83.096	0.3186	9.0974	270.384	882.447	49.786	83.8207	3.73643	0.461	3	4	4	4	4	4	3	3	3
1	35	85	1.69	140	101	82	29.7609	91	4.675	5.19783	1.26454	3.10318	1.52573	3.6721	3.40678	0.828807	2.0339	2.40678	4.998	76.024	0.3717	8.468	252.015	770.588	41.178	32.8779	1.00307	-0.081	2	2	4	3	3	3	1	1	1
1	47	85	1.69	129	90	93	29.7609	91	6.27	5.74088	3.0936	3.12904	1.18955	4.55133	4.82609	2.60064	2.63043	3.82609	6.783	97.24	0.4602	9.65618	287.376	878.712	48.337	80.4336	3.14746	0.415	4	4	4	4	4	4	3	3	3
1	37	62	1.65	128	74	69	22.7732	81	5.335	7.86139	1.41131	5.89604	1.31885	6.54254	5.96078	1.07011	4.47059	4.96078	3.927	106.08	0.3481	8.70988	198.352	705.5	33.387	22.581	1.33637	0.029	2	3	2	2	2	2	1	1	1
1	36	81	1.75	123	75	79	26.449	86	4.675	5.43057	3.37586	3.05146	0.827515	4.60305	6.5625	4.07952	3.6875	5.5625	5.712	70.72	0.2655	9.44995	249.941	812.695	46.941	70.8931	4.99096	0.611	4	4	4	4	4	4	3	3	3
1	35	66	1.72	134	90	62	22.3094	81	4.73	3.90484	1.03873	2.30153	1.13783	2.767	3.43182	0.912899	2.02273	2.43182	4.641	81.328	0.3422	8.28299	184.788	670.922	32.873	16.6196	1.15222	-0.041	1	2	1	2	1	1	1	1	1
1	58	69	1.7	105	79	62	23.8754	84	4.675	6.15464	0.993564	3.95656	1.73261	4.42203	3.55224	0.57345	2.28358	2.55224	4.998	104.312	0.3953	8.22684	196.419	691.055	31.537	18.8777	0.724459	-0.244	1	1	2	1	2	2	0	0	0
1	46	58	1.75	123	74	69	18.9388	74	5.335	6.77528	0.824207	4.65477	1.73261	5.04267	3.91045	0.475703	2.68657	2.91045	3.927	89.284	0.2832	8.17202	154.768	604.73	25.168	7.41786	0.594694	-0.319	1	1	1	1	1	1	0	0	0
1	57	55	1.64	125	86	67	20.4491	74	5.06	5.63745	1.28712	3.4135	1.62917	4.00828	3.46032	0.790045	2.09524	2.46032	5.355	106.08	0.2183	8.56484	175.144	633.798	28.12	11.5841	0.951768	-0.102	2	2	1	1	1	1	1	1	1
1	55	67	1.66	166	97	87	24.3141	86	6.655	7.37005	1.94197	4.96509	1.52573	5.84432	4.83051	1.27281	3.25424	3.83051	4.998	79.56	0.3776	9.25014	224.909	795.512	35.926	40.7813	1.63037	0.104	4	3	3	2	3	4	2	2	2
1	44	71	1.68	120	91	64	25.1559	84	5.115	5.76674	2.6194	3.07732	1.49987	4.26687	3.84483	1.74642	2.05172	2.84483	4.284	93.704	0.4307	9.28619	233.602	780.04	37.398	49.7685	2.14524	0.243	4	4	3	3	4	3	2	2	2
1	36	71	1.75	140	106	102	23.1837	79	5.445	7.62865	4.36943	4.03413	1.60331	6.02534	4.75806	2.72525	2.51613	3.75806	3.57	97.24	0.4189	9.8604	228.6	778.971	35.786	61.172	3.28855	0.436	4	4	3	2	4	3	3	3	3
1	45	64	1.63	127	71	92	24.0882	81	5.115	6.6977	2.94682	4.37031	0.982674	5.71502	6.81579	2.99878	4.44737	5.81579	4.641	89.284	0.3953	9.40397	226.525	761.722	40.414	47.1491	3.63596	0.477	4	4	3	3	4	3	3	3	3
1	47	79	1.63	133	94	77	29.7339	91	6.05	5.27541	2.9694	2.99974	0.905094	4.37031	5.82857	3.28077	3.31429	4.82857	4.641	88.4	0.3068	9.57949	284.836	871.733	51.678	77.2045	3.97269	0.516	4	4	4	4	4	4	3	3	3
1	38	80	1.8	135	78	62	24.6914	86	5.39	4.91337	0.959693	3.12904	1.34471	3.56866	3.65385	0.713679	2.32692	2.65385	8.568	103.428	0.413	8.33447	205.789	716.765	35.232	20.1536	0.906638	-0.149	1	2	2	2	2	2	1	1	0
1	43	70	1.7	134	80	77	24.2215	81	5.115	5.35299	0.801626	3.62038	1.37057	3.98242	3.90566	0.584884	2.64151	2.90566	6.069	91.936	0.3245	8.10213	196.245	656.273	33.851	12.826	0.707076	-0.237	1	1	2	2	1	1	0	0	0
1	37	81	1.62	140	87	84	30.8642	86	5.885	5.6633	2.65327	3.59452	0.853375	4.80993	6.63636	3.10915	4.21212	5.63636	2.856	92.82	0.5015	9.43927	291.335	811.777	53.9	55.7186	3.48064	0.493	4	4	4	4	4	4	3	3	3
1	44	59	1.62	118	81	73	22.4813	76	4.84	7.70623	0.496782	6.12878	1.34471	6.36152	5.73077	0.369434	4.55769	4.73077	4.998	99.892	0.295	7.56838	170.147	575.197	30.686	5.4646	0.435775	-0.432	1	1	1	1	1	1	0	0	0
1	41	82	1.75	118	79	69	26.7755	91	5.115	4.52547	0.564525	2.74114	1.52573	2.99974	2.9661	0.370003	1.79661	1.9661	4.641	85.748	0.3422	7.75148	207.55	705.384	35.885	14.6777	0.47572	-0.432	1	1	2	2	1	2	0	0	0
1	46	68	1.63	132	92	72	25.5937	79	5.225	6.74942	2.46133	4.16343	1.44815	5.30127	4.66071	1.69964	2.875	3.66071	4.998	83.096	0.4012	9.24522	236.62	730.373	38.215	34.4586	1.9451	0.23	4	4	3	3	3	2	2	2	2
1	44	74	1.72	128	89	82	25.0135	86	5.39	5.01681	1.96455	3.18076	0.930954	4.08585	5.38889	2.11025	3.41667	4.38889	4.641	95.472	0.3658	9.05088	226.394	778.375	41.271	41.2555	2.66208	0.324	3	4	3	3	3	3	3	3	3
1	49	96	1.67	170	92	97	34.4222	91	4.125	8.30101	1.35486	5.97362	1.70675	6.59426	4.86364	0.793825	3.5	3.86364	3.57	87.516	0.4012	8.41183	289.554	765.477	45.994	35.2264	0.880088	-0.102	2	2	4	4	3	3	1	1	0
0	39	108	1.63	163	80	72	40.6489	97	10.615	5.04267	1.38873	2.79286	1.60331	3.43936	3.14516	0.866166	1.74194	2.14516	6.426	53.04	0.2537	9.38173	381.357	910.028	61.386	54.1606	1.39025	-0.06	4	2	4	4	4	4	1	1	1
1	59	72	1.7	141	95	82	24.9135	91	5.94	8.01655	1.14034	6.28394	1.21541	6.80114	6.59574	0.938234	5.17021	5.59574	5.355	114.92	0.4307	8.6041	214.358	782.974	37.259	29.6489	1.25511	-0.027	2	2	2	3	3	3	1	1	1
0	49	58	1.58	114	80	78	23.2335	71	4.29	4.91337	0.508073	3.31006	1.37057	3.5428	3.58491	0.370701	2.41509	2.58491	3.57	79.56	0.3127	7.47022	173.559	530.386	31.029	6.60495	0.61361	-0.432	1	1	1	1	1	1	0	0	0
0	52	61	1.58	143	94	76	24.4352	81	4.785	5.22369	1.38873	3.1549	1.42229	3.8014	3.67273	0.976405	2.21818	2.67273	5.355	79.56	0.3186	8.58495	209.775	695.381	34.725	31.9408	1.79325	-0.009	2	3	2	2	3	2	1	1	2
0	48	65	1.54	117	78	68	27.4077	81	5.335	6.36152	1.24196	4.39617	1.39643	4.96509	4.55556	0.889378	3.14815	3.55556	4.998	77.792	0.2478	8.58204	235.214	695.146	39.284	28.565	1.52959	-0.051	2	2	3	3	3	2	1	1	2
1	43	70	1.74	160	97	74	23.1206	81	6.105	5.27541	1.00485	3.25834	1.55159	3.72382	3.4	0.647629	2.1	2.4	6.069	86.632	0.3658	8.50502	196.641	688.907	32.412	16.0777	0.802417	-0.187	2	2	2	2	1	2	0	0	0
1	49	60	1.65	106	66	80	22.0386	76	4.345	5.19783	1.59196	3.07732	1.39643	3.8014	3.72222	1.14002	2.2037	2.72222	4.284	106.08	0.4012	8.62506	190.084	655.505	31.496	17.5116	1.35854	0.057	2	3	1	1	1	1	1	1	1
1	44	67	1.63	151	115	58	25.2174	91	6.765	6.51668	2.34842	4.11171	1.31885	5.19783	4.94118	1.78066	3.11765	3.94118	4.641	76.908	0.3127	9.45658	238.47	860.548	39.243	61.059	2.36644	0.25	4	4	3	3	4	4	2	2	2
1	47	63	1.65	116	93	72	23.1405	76	4.895	4.86165	0.835497	3.07732	1.39643	3.46522	3.48148	0.598309	2.2037	2.48148	4.641	91.052	0.3422	8.09955	187.428	615.566	32.076	9.19047	0.695237	-0.222	1	2	1	1	1	1	0	0	0
1	50	69	1.68	165	104	69	24.4473	84	5.115	7.80967	4.58394	5.48229	1.03439	6.77528	7.55	4.43153	5.3	6.55	4.284	83.096	0.4248	9.84581	240.703	827.048	42.31	87.095	5.52823	0.646	4	4	4	4	4	4	3	3	3
1	47	82	1.74	151	89	98	27.0842	84	5.06	6.49082	1.01615	4.70649	1.31885	5.17197	4.92157	0.770477	3.56863	3.92157	4.641	96.356	0.4012	8.32845	225.569	699.59	38.66	19.3068	0.90856	-0.114	1	2	3	3	2	2	1	1	0
1	48	75	1.67	125	85	61	26.8923	81	4.84	6.02534	1.35486	3.4135	1.99121	4.03413	3.02597	0.680422	1.71429	2.02597	4.284	71.604	0.4838	8.57168	230.512	694.306	35.226	21.6778	0.776801	-0.167	2	2	3	2	2	2	0	0	0
1	54	58	1.65	141	88	96	21.3039	81	7.755	4.91337	1.71616	2.56012	1.57745	3.33592	3.11475	1.08793	1.62295	2.11475	4.641	70.72	0.3599	9.27949	197.69	751.639	31.467	27.4585	1.40569	0.037	4	3	2	1	2	3	1	1	1
1	56	63	1.76	126	92	110	20.3383	76	6.6	6.10292	1.38873	4.13757	1.31885	4.78407	4.62745	1.05299	3.13725	3.62745	8.568	99.008	0.4189	8.90653	181.144	676.896	30.493	15.2761	1.3063	0.021	3	3	1	1	1	1	1	1	1
1	55	65	1.65	123	91	71	23.8751	79	4.95	5.55987	2.86779	3.05146	1.18955	4.37031	4.67391	2.41081	2.56522	3.67391	4.641	91.052	0.4189	9.344	223.089	738.176	37.879	40.149	2.86439	0.382	4	4	3	3	3	3	3	3	3
1	54	70	1.68	146	84	83	24.8016	81	4.95	6.4391	1.43389	4.68063	1.11197	5.32713	5.7907	1.2895	4.2093	4.7907	5.712	108.732	0.4956	8.65085	214.555	700.719	37.761	22.9423	1.5392	0.111	2	3	2	3	2	2	2	2	2
1	54	70	1.7	139	85	94	24.2215	61	5.83	5.48229	0.970983	3.31006	1.73261	3.74968	3.16418	0.560417	1.91045	2.16418	4.284	76.908	0.354	8.42464	204.057	513.903	32.817	-3.88393	0.510214	-0.252	2	1	2	2	1	1	0	0	0
1	52	67	1.62	137	79	80	25.5296	79	4.84	6.51668	1.11776	4.62891	1.37057	5.14611	4.75472	0.815543	3.37736	3.75472	7.14	114.036	0.5546	8.37931	213.921	661.965	36.117	15.6486	0.934606	-0.086	2	2	2	2	1	1	1	1	1
1	51	54	1.7	132	77	84	18.6851	65	5.555	4.52547	0.700011	2.92216	1.29299	3.23248	3.5	0.541389	2.26	2.5	3.213	76.908	0.3009	8.04911	150.399	523.192	26.64	0	0.598285	-0.268	1	1	1	1	1	1	0	0	0
1	50	72	1.65	159	112	76	26.4463	86	5.5	4.86165	2.17907	2.84458	1.00853	3.85312	4.82051	2.16063	2.82051	3.82051	4.641	77.792	0.4071	9.17471	242.637	789.025	43.129	45.7604	2.6435	0.334	3	4	4	4	3	3	3	3	3
1	49	64	1.64	179	140	89	23.7954	86	6.27	5.12025	1.3097	3.20662	1.31885	3.8014	3.88235	0.99306	2.43137	2.88235	3.213	71.604	0.3953	8.79664	209.319	756.511	35.354	27.5037	1.28673	-0.004	3	3	2	2	2	3	1	1	1
1	46	79	1.69	143	96	75	27.6601	97	6.82	4.26687	1.24196	2.58598	1.11197	3.1549	3.83721	1.11689	2.32558	2.83721	5.712	86.632	0.4366	8.82761	244.173	856.279	43.246	39.7426	1.50293	0.049	3	3	4	4	3	4	1	1	2
1	44	77	1.67	127	87	64	27.6095	91	4.455	8.81821	1.29841	7.2149	1.00853	7.80967	8.74359	1.28742	7.15385	7.74359	5.355	106.964	0.3776	8.44623	233.196	768.607	42.385	33.7586	1.62693	0.111	2	3	3	4	3	3	2	2	2
1	43	67	1.77	148	98	93	21.3859	94	3.85	6.41324	1.47906	4.18929	1.55159	4.86165	4.13333	0.953252	2.7	3.13333	4.998	87.516	0.3186	8.43055	180.295	792.471	29.267	42.8926	1.4266	-0.022	2	2	1	1	3	3	1	1	1
1	47	71	1.75	110	86	62	23.1837	79	4.675	5.17197	1.16292	3.49108	1.13783	4.03413	4.54545	1.02205	3.06818	3.54545	5.355	112.268	0.3894	8.38423	194.377	662.354	34.361	16.2809	1.2333	0.009	2	3	2	2	1	1	1	1	1
1	45	64	1.71	120	75	65	21.8871	81	3.85	4.65477	1.33228	2.767	1.26713	3.38764	3.67347	1.05141	2.18367	2.67347	5.712	94.588	0.3776	8.32603	182.233	674.409	31.233	21.3165	1.34008	0.021	1	3	1	1	2	1	1	1	1
1	40	60	1.73	149	90	88	20.0474	76	6.6	5.04267	1.75003	3.12904	1.11197	3.9307	4.53488	1.5738	2.81395	3.53488	4.641	94.588	0.3127	9.13777	183.189	694.47	31.872	19.2503	1.96621	0.196	3	3	1	1	2	2	2	2	2
1	47	72	1.71	155	105	64	24.623	81	4.895	3.85312	1.61454	1.93949	1.16369	2.68942	3.31111	1.38743	1.66667	2.31111	5.712	100.776	0.4248	8.75833	215.656	709.425	37.327	25.8327	1.66256	0.143	3	3	3	3	2	2	2	2	2
1	45	82	1.67	146	83	63	29.4023	86	5.225	4.60305	0.66614	2.74114	1.55159	3.05146	2.96667	0.429327	1.76667	1.96667	4.284	76.908	0.3186	7.93827	233.403	682.691	39.619	13.9889	0.494535	-0.367	1	1	3	3	1	2	0	0	0
1	46	55	1.61	124	76	57	21.2183	74	5.28	4.83579	0.564525	2.99974	1.57745	3.25834	3.06557	0.357872	1.90164	2.06557	7.854	81.328	0.3068	7.78322	165.147	575.959	28.333	5.08073	0.423294	-0.444	1	1	1	1	1	1	0	0	0
1	45	80	1.62	170	117	80	30.4832	89	5.885	4.93923	2.20165	3.0256	0.905094	4.03413	5.45714	2.43251	3.34286	4.45714	5.355	80.444	0.3245	9.25268	282.051	823.489	51.556	52.8396	2.83896	0.386	4	4	4	4	4	4	3	3	3
1	40	54	1.64	121	75	97	20.0773	71	4.51	5.94776	9.9921	2.35325	1.06025	4.88751	5.60976	9.42425	2.21951	4.60976	3.927	81.328	0.2301	10.4992	210.795	745.44	37.61	59.9526	10.9915	0.974	4	4	2	3	4	3	3	3	3
1	38	60	1.68	140	91	69	21.2585	76	4.455	4.26687	1.12905	2.35325	1.39643	2.87044	3.05556	0.808526	1.68519	2.05556	5.355	114.92	0.3422	8.30647	176.583	631.292	29.677	12.4196	0.981245	-0.092	1	2	1	1	1	1	1	1	1
1	37	67	1.75	116	82	83	21.8776	81	5.39	4.86165	1.1855	2.767	1.55159	3.31006	3.13333	0.764057	1.78333	2.13333	3.927	95.472	0.354	8.54578	186.961	692.208	30.499	18.968	0.974049	-0.119	2	2	1	1	2	2	1	1	1
1	41	72	1.65	134	90	61	26.4463	84	5.06	5.06853	1.05002	3.33592	1.24127	3.82726	4.08333	0.84592	2.6875	3.08333	3.57	96.356	0.3894	8.36124	221.124	702.344	38.426	19.9503	1.0109	-0.071	2	2	3	3	2	2	1	1	1
1	37	73	1.76	146	85	76	23.5666	84	5.005	7.2149	3.00327	4.26687	1.57745	5.63745	4.57377	1.90388	2.70492	3.57377	4.284	87.516	0.4012	9.40121	221.555	789.702	35.002	57.0622	2.42186	0.279	4	4	3	2	4	3	2	2	2
1	49	80	1.7	117	80	58	27.6817	89	4.785	6.33566	1.34357	4.44789	1.26713	5.06853	5	1.06032	3.5102	4	5.355	85.748	0.354	8.55188	236.73	761.118	40.399	32.2457	1.30855	0.025	2	3	3	3	3	3	1	1	1
1	57	80	1.6	157	97	61	31.25	91	4.07	6.72356	1.1855	4.78407	1.39643	5.32713	4.81481	0.848952	3.42593	3.81481	5.712	91.052	0.3599	8.26488	258.277	752.104	43.349	30.8231	0.998231	-0.071	1	2	4	4	3	3	1	1	1
1	48	67	1.73	144	102	80	22.3863	81	4.95	6.28394	0.620978	4.16343	1.83605	4.44789	3.42254	0.338214	2.26761	2.42254	6.069	76.908	0.3186	7.814	174.927	632.934	28.677	9.93564	0.426125	-0.469	1	1	1	1	1	1	0	0	0
1	52	71	1.72	144	86	60	23.9995	84	4.015	5.17197	1.28712	3.12904	1.44815	3.72382	3.57143	0.888801	2.16071	2.57143	6.783	99.008	0.4248	8.33351	200	700.015	33.154	24.4552	1.11977	-0.051	1	2	2	2	2	2	1	1	1
1	59	63	1.64	149	105	69	23.4236	81	4.95	5.61159	1.91939	3.56866	1.16369	4.44789	4.82222	1.64939	3.06667	3.82222	8.568	94.588	0.3717	8.94246	209.464	724.339	36.04	30.7102	2.02971	0.217	3	4	2	2	3	2	2	2	2
1	54	75	1.76	139	92	69	24.2123	86	5.72	5.94776	0.745173	3.2842	2.32739	3.62038	2.55556	0.320176	1.41111	1.55556	5.712	95.472	0.4307	8.1409	197.11	700.117	30.2	15.6486	0.411042	-0.495	1	1	2	1	1	2	0	0	0
1	53	65	1.72	118	65	75	21.9713	81	5.5	8.61133	1.86293	6.90458	0.853375	7.75795	10.0909	2.18302	8.09091	9.09091	5.355	90.168	0.295	9.01797	198.137	730.455	37.071	29.8069	2.77694	0.338	3	4	2	3	3	2	3	3	3
1	48	67	1.68	139	90	61	23.7387	86	5.115	7.83553	4.67427	5.53401	0.956814	6.87872	8.18919	4.88524	5.78378	7.18919	3.927	74.256	0.4012	9.86532	234.189	848.417	42.057	98.1596	6.33791	0.689	4	4	3	4	4	4	3	3	3
1	48	76	1.68	139	90	76	26.9274	97	5.28	5.97362	2.29197	3.85312	1.06025	4.91337	5.63415	2.16172	3.63415	4.63415	6.069	99.008	0.413	9.18441	247.313	890.887	43.358	73.3431	2.95325	0.334	3	4	4	4	4	4	3	3	3
1	53	81	1.75	138	102	69	26.449	84	4.95	5.35299	2.45004	2.99974	1.24127	4.11171	4.3125	1.97381	2.41667	3.3125	6.426	70.72	0.2124	9.18656	242.975	771.671	40.885	46.5508	2.35864	0.294	4	4	4	3	4	3	3	3	2
1	49	55	1.65	175	94	78	20.202	74	5.39	6.59426	5.5888	4.16343	0.905094	5.68916	7.28571	6.17483	4.6	6.28571	5.712	75.14	0.2832	10.0964	203.967	747.132	37.147	50.2992	7.48332	0.79	4	4	2	3	4	3	3	3	3
1	60	68	1.7	111	82	71	23.5294	81	5.28	3.72382	0.745173	1.93949	1.44815	2.27567	2.57143	0.514569	1.33929	1.57143	7.14	89.284	0.4189	8.06086	189.667	652.929	32.46	11.9228	0.631715	-0.292	1	1	1	2	1	1	0	0	0
1	53	97	1.75	135	88	75	31.6735	102	5.06	5.61159	1.58067	4.03413	0.853375	4.75821	6.57576	1.85226	4.72727	5.57576	3.927	100.776	0.4897	8.77028	277.785	894.569	52.36	58.4848	2.42164	0.267	3	4	4	4	4	4	2	2	2
1	57	91	1.77	149	98	83	29.0466	94	5.17	5.14611	1.85164	3.10318	1.18955	3.95656	4.32609	1.55659	2.6087	3.32609	6.069	96.356	0.4012	8.95001	259.967	841.301	44.491	53.6976	1.9737	0.193	3	3	4	4	4	4	2	2	2
1	59	65	1.68	132	74	57	23.03	81	6.05	4.52547	0.993564	2.5084	1.55159	2.97388	2.91667	0.640352	1.61667	1.91667	4.998	113.152	0.2891	8.48467	195.402	687.258	32.231	15.897	0.795029	-0.194	2	2	2	2	1	2	0	0	0
1	52	95	1.73	135	95	84	31.7418	102	6.05	6.64598	2.41617	4.34445	1.18955	5.45643	5.58696	2.03116	3.65217	4.58696	4.641	107.848	0.4071	9.37331	297.526	956.078	50.346	89.3982	2.6521	0.307	4	4	4	4	4	4	3	3	3
1	54	70	1.7	108	79	62	24.2215	84	4.29	5.24955	0.812916	3.46522	1.42229	3.82726	3.69091	0.571554	2.43636	2.69091	4.998	101.66	0.354	7.94023	192.324	666.979	32.815	15.4454	0.716552	-0.244	1	1	1	2	1	1	0	0	0
0	57	70	1.6	130	85	63	27.3437	86	4.4	5.89604	1.46777	3.4135	1.81019	4.08585	3.25714	0.810836	1.88571	2.25714	4.998	68.068	0.2832	8.55641	233.964	735.852	36.487	41.0974	1.48261	-0.092	2	2	3	2	3	3	1	1	2
1	60	56	1.67	140	92	90	20.0796	71	5.665	4.52547	0.609687	2.45668	1.78433	2.74114	2.53623	0.34169	1.37681	1.53623	4.998	89.284	0.2301	7.93057	159.243	563.07	26.371	3.65812	0.39849	-0.469	1	1	1	1	1	1	0	0	0
1	53	75	1.76	135	86	78	24.2123	84	4.895	3.87898	0.67743	2.14637	1.42229	2.45668	2.72727	0.476295	1.50909	1.72727	5.355	84.864	0.3717	7.88983	191.031	662.746	33.06	12.8712	0.597248	-0.319	1	1	1	2	1	1	0	0	0
0	55	57	1.59	116	84	75	22.5466	86	5.225	5.68916	0.835497	3.56866	1.73261	3.95656	3.28358	0.482219	2.0597	2.28358	3.213	68.952	0.2301	8.16479	184.088	702.172	29.904	23.3939	0.982685	-0.319	1	1	1	1	2	2	0	0	1
1	58	61	1.65	148	98	100	22.4059	81	4.455	5.74088	1.20808	3.46522	1.73261	4.00828	3.31343	0.697263	2	2.31343	4.641	91.936	0.3953	8.37413	187.63	678.305	29.818	19.3293	0.878104	-0.155	2	2	1	1	2	2	0	0	0
0	56	51	1.54	121	74	85	21.5045	76	4.235	5.22369	0.745173	2.81872	2.06879	3.1549	2.525	0.360198	1.3625	1.525	5.712	54.808	0.1652	7.84031	168.602	595.864	26.463	13.4131	0.665219	-0.444	1	1	1	1	1	1	0	0	0
0	53	54	1.57	133	86	70	21.9076	74	5.335	5.89604	1.53551	3.85312	1.34471	4.55133	4.38462	1.14189	2.86538	3.38462	5.355	73.372	0.2655	8.79422	192.66	650.772	32.156	24.5681	2.0333	0.057	3	3	1	2	2	1	1	1	2
1	58	58	1.62	141	86	62	22.1003	71	4.62	5.12025	1.10647	3.05146	1.55159	3.56866	3.3	0.71312	1.96667	2.3	3.213	98.124	0.3835	8.32264	183.933	590.907	30.138	6.63882	0.792768	-0.149	1	2	1	1	1	1	1	1	0
1	50	57	1.65	109	80	78	20.9366	79	4.51	4.70649	0.711302	3.31006	1.06025	3.64624	4.43902	0.670879	3.12195	3.43902	6.069	91.936	0.3422	7.85671	164.493	620.68	30.59	9.95823	0.852813	-0.174	1	2	1	1	1	1	0	0	0
0	60	60	1.55	138	75	80	24.974	76	7.865	5.94776	0.914531	4.08585	1.44815	4.49961	4.10714	0.631516	2.82143	3.10714	4.284	68.952	0.3245	8.66415	216.378	658.475	36.632	16.4616	1.07501	-0.201	2	2	3	2	1	1	0	0	1
0	45	67	1.56	133	86	80	27.5312	76	4.675	5.48229	1.24196	3.36178	1.55159	3.9307	3.53333	0.80044	2.16667	2.53333	3.927	68.068	0.2655	8.44998	232.638	642.199	37.888	22.3552	1.28825	-0.097	2	2	3	3	2	1	1	1	1
0	57	57	1.53	157	92	99	24.3496	76	5.28	7.78381	2.00971	4.75821	2.09465	5.68916	3.71605	0.95945	2.2716	2.71605	4.998	72.488	0.2832	9.05298	220.437	688.027	32.767	36.1748	1.65657	-0.018	3	2	3	2	3	2	1	1	2
0	58	56	1.65	116	71	74	20.5693	76	4.84	4.99095	0.835497	3.23248	1.37057	3.62038	3.64151	0.609598	2.35849	2.64151	3.213	60.112	0.3186	8.08825	166.37	614.707	28.607	15.039	1.15218	-0.215	1	2	1	1	1	1	0	0	1
0	44	63	1.65	117	78	80	23.1405	74	5.335	5.24955	0.925821	3.31006	1.52573	3.72382	3.44068	0.606805	2.16949	2.44068	4.641	55.692	0.1475	8.28828	191.795	613.333	31.896	14.8131	1.04916	-0.215	1	2	1	1	1	1	0	0	1
1	49	71	1.71	152	93	60	24.281	81	4.895	5.14611	1.28712	3.8014	0.775795	4.37031	6.63333	1.65909	4.9	5.63333	4.641	113.152	0.413	8.53169	207.158	691.067	40.524	20.5939	2.00308	0.22	2	4	2	3	2	2	2	2	2
1	52	71	1.7	122	78	70	24.5675	86	5.115	6.25808	1.3097	4.00828	1.65503	4.60305	3.78125	0.791344	2.42188	2.78125	4.641	93.704	0.5369	8.59304	211.109	739.002	33.736	27.5037	1.00803	-0.102	2	2	2	2	2	3	1	1	1
1	43	76	1.83	129	79	62	22.694	86	5.555	6.15464	1.51293	3.98242	1.47401	4.68063	4.17544	1.0264	2.70175	3.17544	3.927	103.428	0.3363	8.81981	200.157	758.504	32.646	31.7715	1.36337	0.013	3	3	2	2	3	3	1	1	1
1	48	86	1.68	145	106	99	30.4705	86	5.885	4.70649	1.67099	2.79286	1.13783	3.56866	4.13636	1.46858	2.45455	3.13636	5.355	82.212	0.3599	8.97689	273.531	772.013	47.439	35.0909	1.65659	0.167	3	3	4	4	3	3	2	2	2
0	57	53	1.63	137	84	82	19.9481	74	5.39	5.94776	1.61454	3.77554	1.42229	4.52547	4.18182	1.13517	2.65455	3.18182	3.213	54.808	0.2419	8.85466	176.633	655.245	29.004	25.8327	2.12211	0.057	3	3	1	1	2	1	1	1	2
1	56	55	1.6	132	80	83	21.4844	76	5.39	4.29273	1.19679	2.53426	1.21541	3.07732	3.53191	0.984681	2.08511	2.53191	4.998	83.096	0.236	8.55526	183.804	650.2	31.859	13.1647	1.18869	-0.009	2	3	1	1	1	1	1	1	1
0	50	50	1.57	116	64	81	20.2848	76	4.95	3.87898	1.53551	1.68089	1.49987	2.37911	2.58621	1.02376	1.12069	1.58621	4.284	73.372	0.2537	8.71932	176.87	662.668	28.747	27.6392	1.94887	0.009	2	3	1	1	2	1	1	1	2
1	43	58	1.67	118	80	101	20.7967	79	6.655	6.41324	1.73874	4.55133	1.06025	5.35299	6.04878	1.63993	4.29268	5.04878	2.856	82.212	0.3186	9.1396	190.074	722.028	33.502	24.3423	2.09161	0.215	3	2	1	2	2	2	2	2	2
1	48	59	1.65	114	68	62	21.6713	74	4.455	3.5428	1.3097	1.60331	1.34471	2.19809	2.63462	0.973962	1.19231	1.63462	4.641	111.384	0.3363	8.45489	183.228	625.662	30.864	11.7873	1.13981	-0.013	2	3	1	1	1	1	1	1	1
1	50	78	1.7	135	78	79	26.9896	81	5.06	4.88751	1.32099	3.25834	1.03439	3.85312	4.725	1.27707	3.15	3.725	3.927	109.616	0.4543	8.59082	231.863	695.856	41.757	21.1358	1.45501	0.107	2	3	3	4	2	2	2	2	1
0	46	54	1.53	100	76	88	23.0681	71	5.61	4.99095	0.620978	3.12904	1.57745	3.4135	3.16393	0.393659	1.98361	2.16393	4.284	53.04	0.295	7.93916	183.141	563.68	31.185	8.07271	0.654152	-0.409	1	1	1	1	1	1	0	0	0
1	57	69	1.62	137	94	73	26.2917	89	5.555	5.35299	1.01615	3.4135	1.47401	3.87898	3.63158	0.689374	2.31579	2.63158	5.712	97.24	0.4012	8.42178	221.423	749.539	36.913	24.3875	0.87571	-0.161	2	2	3	3	2	3	0	0	0
0	52	58	1.62	93	70	68	22.1003	74	4.4	5.14611	0.812916	3.10318	1.68089	3.46522	3.06154	0.483623	1.84615	2.06154	2.856	56.576	0.2596	7.96555	176.041	589.45	28.836	13.0067	0.857157	-0.319	1	1	1	1	1	1	0	0	0
1	49	76	1.66	134	90	74	27.5802	91	5.225	6.827	1.79519	4.91337	1.08611	5.74088	6.28571	1.65286	4.52381	5.28571	3.213	94.588	0.4425	8.92963	246.281	812.597	43.204	46.6749	2.08999	0.217	3	4	4	4	4	4	2	2	2
1	49	65	1.73	118	89	80	21.7181	81	5.72	4.60305	1.24196	2.74114	1.29299	3.31006	3.56	0.960528	2.12	2.56	6.783	72.488	0.3127	8.65172	187.899	700.79	31.992	19.8713	1.22908	-0.018	2	2	1	1	2	2	1	1	1
0	46	60	1.57	162	104	75	24.3418	81	4.675	5.53401	1.28712	3.20662	1.73261	3.8014	3.19403	0.742878	1.85075	2.19403	2.856	70.72	0.3127	8.4857	206.557	687.342	32.701	29.6037	1.36727	-0.131	2	2	2	2	3	2	1	1	1
1	56	75	1.7	132	80	62	25.9516	89	3.905	4.83579	1.91939	3.0256	0.930954	3.90484	5.19444	2.06174	3.25	4.19444	7.497	97.24	0.3127	8.70533	225.917	774.774	41.588	46.0653	2.63795	0.314	2	4	3	3	4	3	3	3	3
1	55	75	1.67	120	84	71	26.8923	84	5.72	5.12025	1.47906	3.56866	0.879235	4.24101	5.82353	1.68221	4.05882	4.82353	4.998	83.98	0.3776	8.82644	237.364	741.421	44.426	28.1021	1.99162	0.225	3	4	3	4	2	3	2	2	2
1	43	60	1.6	122	81	78	23.4375	79	4.565	6.36152	2.63069	3.85312	1.29299	5.06853	4.92	2.03457	2.98	3.92	5.712	80.444	0.3658	9.17673	215.08	724.962	35.885	36.8296	2.44112	0.307	3	4	3	2	3	2	3	3	2
0	48	58	1.57	107	70	72	23.5304	69	3.905	5.14611	0.632268	2.5084	2.35325	2.79286	2.18681	0.268679	1.06593	1.18681	2.856	60.112	0.2006	7.59488	178.71	524.047	27.585	6.95495	0.429216	-0.569	1	1	1	1	1	1	0	0	0
0	53	54	1.58	121	86	79	21.6311	74	4.73	8.97336	0.767754	6.41324	2.19809	6.77528	4.08235	0.349283	2.91765	3.08235	4.284	60.996	0.2537	7.98071	172.632	590.572	26.684	12.2841	0.626144	-0.456	1	1	1	1	1	1	0	0	0
1	50	70	1.8	128	81	77	21.6049	81	4.73	5.94776	1.45648	3.74968	1.52573	4.42203	3.89831	0.954608	2.45763	2.89831	5.355	111.384	0.3717	8.62101	186.256	698.302	30.232	23.3036	1.22474	-0.022	2	2	1	1	2	2	1	1	1
0	57	57	1.6	123	69	71	22.2656	74	5.005	4.70649	1.15163	2.81872	1.37057	3.33592	3.43396	0.840256	2.0566	2.43396	3.213	58.344	0.2006	8.44269	187.982	624.759	31.686	18.4261	1.48333	-0.076	2	2	1	1	2	1	1	1	2
1	57	52	1.64	120	82	70	19.3337	79	6.325	3.31006	1.12905	1.70675	1.08611	2.22395	3.04762	1.03953	1.57143	2.04762	4.641	101.66	0.3953	8.65696	167.371	683.899	29.991	15.8067	1.37382	0.017	2	3	1	1	1	2	1	1	1
1	41	80	1.68	145	89	76	28.3447	81	5.885	6.67184	1.85164	4.55133	1.26713	5.40471	5.26531	1.46129	3.59184	4.26531	3.213	76.908	0.3776	9.07955	257.357	735.443	43.218	29.6263	1.61928	0.164	3	3	4	4	3	3	2	2	2
1	56	92	1.65	141	92	89	33.7925	116	5.665	5.17197	1.73874	3.20662	1.16369	4.00828	4.44444	1.49416	2.75556	3.44444	5.355	82.212	0.4838	8.97853	303.407	1041.51	52.248	88.6756	2.13583	0.173	3	3	4	4	4	4	2	2	2
1	35	67	1.75	167	115	70	21.8776	81	5.5	4.73235	2.00971	2.53426	1.26713	3.46522	3.73469	1.58603	2	2.73469	6.069	106.964	0.413	9.09381	198.95	736.598	33.366	32.1554	2.02193	0.201	3	3	2	2	3	3	2	2	2
0	40	58	1.62	108	74	76	22.1003	81	4.62	4.60305	0.835497	2.767	1.44815	3.1549	3.17857	0.576941	1.91071	2.17857	2.856	61.88	0.2537	8.04173	177.725	651.381	30.135	19.2164	1.11928	-0.237	1	1	1	1	2	1	0	0	1
1	59	65	1.6	117	65	100	25.3906	89	5.61	7.18904	2.54036	4.73235	1.29299	5.89604	5.56	1.96472	3.66	4.56	4.284	111.384	0.3717	9.34793	237.35	831.965	39.34	60.9687	2.54414	0.292	4	4	3	3	4	4	3	3	3
0	35	53	1.65	117	87	107	19.4674	66	5.005	6.93044	1.19679	4.00828	2.37911	4.55133	2.91304	0.503044	1.68478	1.91304	4.284	76.908	0.2065	8.48115	165.106	559.756	24.384	9.57435	0.849121	-0.301	2	1	1	1	1	1	0	0	0
1	39	82	1.82	129	75	79	24.7555	89	5.005	5.37885	1.27583	3.77554	1.00853	4.37031	5.33333	1.26503	3.74359	4.33333	3.57	78.676	0.3599	8.5451	211.538	760.514	38.435	30.6198	1.6608	0.104	2	3	2	3	3	3	2	2	2
0	36	60	1.58	129	91	107	24.0346	79	5.225	5.68916	1.47906	4.11171	0.905094	4.78407	6.28571	1.63415	4.54286	5.28571	3.57	53.04	0.2242	8.73593	209.965	690.138	39.008	31.0602	2.95416	0.212	3	3	2	3	3	2	2	2	3
1	58	66	1.65	143	92	91	24.2424	81	6.6	4.00828	0.880659	2.37911	1.21541	2.79286	3.29787	0.724577	1.95745	2.29787	3.927	70.72	0.3245	8.45105	204.874	684.535	36.277	14.0905	0.875547	-0.143	2	2	2	2	1	2	1	1	0
1	41	65	1.67	109	76	60	23.3067	84	4.895	5.61159	1.47906	3.77554	1.16369	4.44789	4.82222	1.271	3.24444	3.82222	5.712	102.544	0.3304	8.67069	202.085	728.338	35.108	28.1021	1.62626	0.104	2	3	2	2	2	2	2	2	2
0	36	75	1.61	129	85	86	28.9341	84	5.115	4.62891	0.67743	2.87044	1.44815	3.18076	3.19643	0.46779	1.98214	2.19643	3.927	60.996	0.3009	7.9338	229.557	666.439	39.567	17.6132	0.807946	-0.328	1	1	3	3	1	1	0	0	0
0	39	77	1.63	133	74	80	28.9811	94	5.5	4.08585	1.29841	2.22395	1.26713	2.81872	3.22449	1.02468	1.7551	2.22449	5.355	77.792	0.3481	8.65696	250.888	813.754	42.836	46.7427	1.97855	0.009	2	3	4	4	4	4	1	1	2
1	57	77	1.68	141	96	77	27.2817	64	4.235	5.68916	2.13391	3.90484	0.801655	4.88751	7.09677	2.66187	4.87097	6.09677	4.284	109.616	0.3127	8.89241	242.6	569.114	46.376	-2.13391	2.3818	0.425	3	4	4	4	1	1	3	3	2
1	51	76	1.78	122	79	82	23.9869	86	5.5	4.99095	2.11132	3.20662	0.827515	4.16343	6.03125	2.5514	3.875	5.03125	4.998	101.66	0.4189	9.14313	219.315	786.309	41.245	44.3378	3.29187	0.407	3	4	3	3	3	3	3	3	3
0	42	50	1.62	117	80	72	19.052	71	5.005	4.88751	0.846788	3.23248	1.26713	3.62038	3.85714	0.668271	2.55102	2.85714	2.856	54.808	0.2301	8.1352	154.992	577.599	27.162	11.0082	1.2266	-0.174	1	2	1	1	1	1	0	0	1
0	45	61	1.53	91	60	78	26.0584	84	4.675	4.49961	0.790335	3.07732	1.06025	3.43936	4.2439	0.745421	2.90244	3.2439	3.57	53.04	0.2596	7.998	208.415	671.832	38.46	20.5487	1.36899	-0.125	1	2	2	3	2	1	1	1	1
0	35	78	1.62	120	73	82	29.7211	86	4.62	6.15464	0.733883	4.00828	1.81019	4.34445	3.4	0.405418	2.21429	2.4	4.998	72.488	0.2832	7.91206	235.155	680.437	38.132	20.5487	0.705395	-0.387	1	1	3	3	2	2	0	0	0
1	54	57	1.69	145	97	76	19.9573	81	5.225	5.19783	1.36615	3.4135	1.16369	4.03413	4.46667	1.17398	2.93333	3.46667	4.641	108.732	0.3776	8.65652	172.761	701.178	30.096	21.8584	1.56662	0.068	2	3	1	1	2	2	2	2	2
0	47	70	1.57	132	97	87	28.3987	81	6.16	4.78407	0.824207	2.84458	1.55159	3.23248	3.08333	0.531201	1.83333	2.08333	2.856	57.46	0.2773	8.31581	236.158	673.581	39.494	18.9568	0.894619	-0.276	1	1	3	3	2	1	0	0	0
0	40	66	1.51	130	81	74	28.9461	84	5.225	7.16318	0.654849	5.35299	1.49987	5.6633	4.77586	0.436604	3.56897	3.77586	3.57	57.46	0.1888	7.92117	229.287	665.379	39.309	17.0261	0.753895	-0.357	1	1	3	3	1	1	0	0	0
1	37	77	1.74	140	97	84	25.4327	81	5.39	4.86165	1.32099	2.8963	1.37057	3.49108	3.54717	0.963824	2.11321	2.54717	4.284	101.66	0.2773	8.65399	220.094	700.974	36.805	21.1358	1.13486	-0.018	2	1	3	3	2	2	1	1	1
1	48	74	1.68	167	97	71	26.2188	89	5.115	4.47375	2.06616	1.83605	1.68089	2.79286	2.66154	1.22921	1.09231	1.66154	3.57	102.544	0.4366	9.04894	237.252	805.356	37.127	49.5879	1.56386	0.09	3	3	3	3	4	4	2	2	2
0	40	50	1.52	132	92	96	21.6413	69	4.62	4.73235	1.5468	2.37911	1.65503	3.07732	2.85938	0.934605	1.4375	1.85938	3.57	66.3	0.236	8.65765	187.363	597.378	29.765	17.0148	1.56183	-0.032	2	2	1	1	1	1	1	1	2
1	53	83	1.74	112	74	70	27.4145	84	5.72	5.48229	1.96455	3.46522	1.11197	4.37031	4.93023	1.76672	3.11628	3.93023	6.069	74.256	0.3599	9.1103	249.754	765.265	43.328	37.3264	2.06917	0.248	3	4	4	4	3	3	2	2	2
1	53	72	1.74	108	73	60	23.7812	84	4.455	5.19783	0.530654	3.6721	1.29299	3.90484	4.02	0.410408	2.84	3.02	5.712	114.036	0.4543	7.55145	179.583	634.322	32.474	10.0824	0.519571	-0.387	1	1	1	2	1	1	0	0	0
1	35	64	1.66	143	87	85	23.2254	79	4.675	6.0512	0.587106	4.34445	1.44815	4.60305	4.17857	0.405418	3	3.17857	5.355	81.328	0.2714	7.70075	178.853	608.359	31.178	8.21949	0.488754	-0.387	1	1	1	1	1	1	0	0	0
1	44	58	1.68	139	103	92	20.5499	79	5.06	5.61159	0.733883	2.53426	2.74114	2.87044	2.04717	0.267729	0.924528	1.04717	2.856	84.864	0.6018	8.00303	164.461	632.239	24.313	10.2744	0.343493	-0.569	1	1	1	1	1	1	0	0	0
1	40	74	1.7	150	81	72	25.6055	86	5.555	6.1805	4.95653	3.72382	1.06025	5.12025	5.82927	4.67486	3.5122	4.82927	5.355	71.604	0.2301	10.0065	256.221	860.557	44.571	104.087	5.82258	0.669	4	4	4	4	4	4	3	3	3
1	45	78	1.7	133	88	74	26.9896	86	10.23	4.39617	0.869369	3.0256	0.982674	3.4135	4.47368	0.884697	3.07895	3.47368	4.998	79.56	0.3481	8.8764	239.571	763.371	45.313	18.2567	1.07019	-0.056	3	2	4	4	2	3	1	1	1
1	39	73	1.68	135	90	71	25.8645	84	5.995	5.63745	1.86293	3.64624	1.13783	4.49961	4.95455	1.63726	3.20455	3.95455	5.355	99.008	0.3658	9.10415	235.474	764.748	40.647	35.3957	1.98082	0.215	3	3	3	3	3	3	2	2	2
1	40	80	1.75	138	100	80	26.1224	91	5.005	5.12025	1.63712	3.38764	0.982674	4.13757	5.21053	1.66599	3.44737	4.21053	4.998	106.08	0.4189	8.79445	229.732	800.295	41.575	42.5652	2.17161	0.223	3	4	3	3	3	4	2	2	2
0	40	42	1.53	110	77	85	17.9418	61	4.62	4.91337	0.688721	2.5084	2.09465	2.81872	2.34568	0.3288	1.19753	1.34568	3.57	68.952	0.2537	7.84854	140.817	478.761	22.183	2.06616	0.533941	-0.481	1	1	1	1	1	1	0	0	0
1	35	51	1.69	130	82	94	17.8565	69	5.115	4.99095	0.89195	3.10318	1.47401	3.51694	3.38596	0.605118	2.10526	2.38596	5.712	99.008	0.3363	8.2089	146.582	566.414	24.648	3.5678	0.72496	-0.215	1	2	1	1	1	1	0	0	0
1	53	84	1.7	160	101	90	29.0657	89	6.27	5.55987	2.13391	3.59452	0.982674	4.57719	5.65789	2.17153	3.65789	4.65789	2.856	92.82	0.2537	9.2848	269.87	826.347	48.214	51.2137	2.60597	0.336	4	4	4	4	4	4	3	3	3
1	54	74	1.78	128	88	63	23.3556	86	10.505	6.28394	1.45648	4.42203	1.18955	5.09439	5.28261	1.22439	3.71739	4.28261	4.998	75.14	0.2537	9.41894	219.985	810.029	38.05	30.586	1.60216	0.086	4	3	3	3	3	4	2	2	2
1	48	63	1.7	137	107	97	21.7993	84	4.84	6.12878	3.65812	2.58598	1.86191	4.26687	3.29167	1.96472	1.38889	2.29167	2.856	76.908	0.3422	9.56493	208.509	803.454	31.679	69.5043	2.6022	0.292	4	4	2	1	4	4	3	3	3
0	36	65	1.59	127	76	93	25.711	86	5.06	4.39617	1.68229	2.6377	0.982674	3.4135	4.47368	1.71195	2.68421	3.47368	4.641	63.648	0.2714	8.83259	227.095	759.603	41.051	47.104	3.2437	0.233	3	4	3	3	4	3	2	2	3
1	39	65	1.66	128	81	77	23.5883	81	5.005	5.50815	5.55493	3.43936	0.801655	4.70649	6.87097	6.92933	4.29032	5.87097	4.998	88.4	0.3481	10.0162	236.265	811.311	44.743	88.8789	8.49564	0.841	4	4	3	4	4	4	3	3	3
0	37	75	1.55	145	90	86	31.2175	97	12.485	5.58573	1.41131	3.51694	1.42229	4.16343	3.92727	0.992281	2.47273	2.92727	4.284	53.04	0.1652	9.56012	298.443	927.331	49.559	55.0412	1.8897	-0.004	4	3	4	4	4	4	1	1	2
1	52	67	1.76	128	85	69	21.6296	81	4.95	5.50815	1.69358	3.31006	1.42229	4.08585	3.87273	1.19074	2.32727	2.87273	4.998	100.776	0.4012	8.8173	190.715	714.201	31.301	27.0972	1.5268	0.076	3	3	1	1	2	2	2	2	2
1	43	73	1.73	133	77	81	24.3911	81	5.28	6.87872	1.20808	5.09439	1.24127	5.63745	5.54167	0.973263	4.10417	4.54167	4.641	99.008	0.3776	8.54403	208.398	692.066	35.915	19.3293	1.17221	-0.013	2	3	2	2	2	2	1	1	1
1	37	80	1.78	120	83	103	25.2493	86	5.115	3.69796	2.00971	1.39643	1.37057	2.32739	2.69811	1.46633	1.01887	1.69811	3.213	70.72	0.3363	9.02124	227.78	775.826	37.504	42.2039	1.84036	0.167	3	3	3	3	3	3	2	2	2
1	38	66	1.65	132	76	71	24.2424	79	5.555	6.93044	1.81777	4.88751	1.21541	5.71502	5.70213	1.4956	4.02128	4.70213	4.284	94.588	0.3894	9.00338	218.264	711.267	37.11	25.4488	1.7626	0.176	3	3	3	3	2	2	2	2	2
1	47	70	1.68	128	83	80	24.8016	81	5.5	5.6633	1.58067	3.23248	1.70675	3.95656	3.31818	0.926129	1.89394	2.31818	3.927	83.096	0.4012	8.85367	219.585	717.147	34.504	25.2907	1.10546	-0.032	3	2	3	2	2	2	1	1	1
0	48	52	1.51	144	91	73	22.806	74	5.335	5.19783	0.643559	3.62038	1.29299	3.90484	4.02	0.497728	2.8	3.02	3.213	55.692	0.3245	7.92462	180.729	586.422	32.203	10.2969	0.867391	-0.301	1	1	1	2	1	1	0	0	0
0	46	50	1.6	116	70	87	19.5312	74	4.73	4.49961	1.1855	2.61184	1.34471	3.1549	3.34615	0.881604	1.94231	2.34615	3.213	53.04	0.2655	8.41516	164.359	622.722	27.798	18.968	1.66576	-0.056	2	2	1	1	2	1	1	1	2
0	37	56	1.59	118	83	87	22.151	69	5.39	5.43057	0.654849	3.0256	2.09465	3.33592	2.59259	0.31263	1.44444	1.59259	3.927	79.56	0.3245	7.95226	176.151	548.706	27.911	7.20334	0.516025	-0.509	1	1	1	1	1	1	0	0	0
1	53	80	1.72	148	96	71	27.0416	86	5.17	4.96509	0.948402	3.23248	1.29299	3.6721	3.84	0.733494	2.5	2.84	6.069	108.732	0.3894	8.28096	223.931	712.163	38.747	19.9165	0.886325	-0.137	1	2	3	3	2	2	1	1	0
1	37	95	1.73	125	88	106	31.7418	102	5.115	6.4391	2.92424	4.11171	0.982674	5.45643	6.55263	2.9758	4.18421	5.55263	7.14	113.152	0.6372	9.39628	298.255	958.421	53.209	108.197	3.88553	0.474	4	4	4	4	4	4	3	3	3
1	52	74	1.7	144	97	86	25.6055	86	4.895	4.93923	1.44518	3.07732	1.18955	3.74968	4.15217	1.2149	2.58696	3.15217	3.57	91.936	0.4012	8.64752	221.424	743.687	38.285	30.3489	1.51317	0.083	2	3	3	3	3	3	2	2	2
1	37	75	1.74	142	78	92	24.7721	84	5.06	5.43057	1.10647	3.62038	1.29299	4.13757	4.2	0.855743	2.8	3.2	3.927	82.212	0.2891	8.41361	208.423	706.743	35.723	21.0229	1.05996	-0.066	2	2	2	2	2	2	1	1	1
1	53	60	1.62	116	80	81	22.8624	81	5.06	6.20636	1.14034	4.05999	1.62917	4.57719	3.80952	0.699952	2.49206	2.80952	4.641	87.516	0.3776	8.44376	193.044	683.945	31.188	18.2455	0.872339	-0.155	2	2	2	1	2	2	0	0	0
0	45	55	1.53	108	78	66	23.4952	86	4.675	7.83553	0.496782	5.97362	1.62917	6.20636	4.80952	0.30493	3.66667	3.80952	4.998	58.344	0.1357	7.53369	177.006	647.898	30.436	13.9099	0.607641	-0.523	1	1	1	1	1	1	0	0	0
0	35	56	1.65	118	72	79	20.5693	69	4.62	5.87018	0.948402	4.03413	1.39643	4.47375	4.2037	0.679161	2.88889	3.2037	6.069	75.14	0.2478	8.16849	168.02	563.626	28.514	10.4324	1.16543	-0.167	1	2	1	1	1	1	0	0	1
1	31	79	1.75	132	91	68	25.7959	84	5.17	3.82726	0.564525	2.01707	1.55159	2.27567	2.46667	0.363837	1.3	1.46667	3.927	80.444	0.3363	7.76217	200.232	652.022	34.483	10.726	0.440826	-0.444	1	1	2	2	1	1	0	0	0
1	57	79	1.74	124	83	61	26.0933	91	5.005	3.98242	0.643559	1.81019	1.88777	2.09465	2.10959	0.34091	0.958904	1.10959	2.856	94.588	0.2891	7.86076	205.113	715.329	33.302	16.7325	0.44465	-0.469	1	1	2	2	1	2	0	0	0
1	54	68	1.68	156	98	85	24.093	81	4.345	5.97362	0.959693	4.26687	1.26713	4.70649	4.71429	0.757374	3.36735	3.71429	4.641	88.4	0.3835	8.11895	195.61	657.635	34.002	15.3551	0.918204	-0.119	1	2	2	2	1	1	1	1	0
1	53	80	1.8	141	102	85	24.6914	86	5.555	5.30127	1.37744	3.20662	1.47401	3.82726	3.59649	0.934485	2.17544	2.59649	3.927	114.92	0.4838	8.72599	215.457	750.436	35.302	28.9263	1.18714	-0.032	2	2	3	2	3	3	1	1	1
1	57	67	1.78	123	80	86	21.1463	89	4.785	5.12025	1.55809	3.0256	1.37057	3.74968	3.73585	1.13682	2.20755	2.73585	3.927	103.428	0.5133	8.70001	183.973	774.301	30.593	37.3942	1.61995	0.057	2	3	1	1	3	3	1	1	2
1	50	74	1.65	118	92	86	27.1809	86	5.115	6.54254	2.00971	4.26687	1.34471	5.19783	4.86538	1.49453	3.17308	3.86538	6.069	85.748	0.3894	9.02124	245.205	775.826	40.566	42.2039	1.80072	0.173	3	3	4	3	3	3	2	2	2
1	53	73	1.73	130	93	60	24.3911	86	4.51	3.72382	0.812916	2.24981	1.11197	2.61184	3.34884	0.731058	2.02326	2.34884	3.927	95.472	0.2655	7.99024	194.89	687.16	35.431	17.0712	0.934844	-0.137	1	2	2	2	1	2	1	1	1
1	51	71	1.72	123	88	60	23.9995	91	4.345	5.55987	0.66614	3.51694	1.73261	3.82726	3.20896	0.384472	2.02985	2.20896	6.069	91.936	0.2832	7.75384	186.088	705.599	30.708	17.3196	0.524747	-0.42	1	1	1	1	1	2	0	0	0
1	52	70	1.7	118	92	80	24.2215	86	6.325	5.63745	0.948402	3.8014	1.39643	4.24101	4.03704	0.679161	2.72222	3.03704	3.57	83.98	0.3186	8.4826	205.461	729.504	34.909	19.9165	0.871731	-0.167	2	2	2	2	2	2	0	0	0
1	51	77	1.7	141	89	85	26.6436	86	7.425	5.7926	1.29841	3.8014	1.39643	4.39617	4.14815	0.929804	2.72222	3.14815	5.355	106.08	0.3717	8.95706	238.648	770.307	39.758	27.2666	1.1329	-0.032	3	2	3	3	2	3	1	1	1
1	53	63	1.73	143	99	71	21.0498	84	4.4	5.19783	2.23552	2.94802	1.21541	3.98242	4.2766	1.83931	2.42553	3.2766	3.213	74.256	0.4189	8.97715	188.967	754.08	32.151	42.4749	2.47941	0.265	3	4	1	1	3	3	2	2	3
0	55	61	1.54	170	88	73	25.721	91	6.27	6.20636	1.52422	4.24101	1.26713	4.93923	4.89796	1.20289	3.34694	3.89796	4.641	71.604	0.354	8.94833	230.16	814.298	38.955	50.2992	2.41114	0.079	3	3	3	3	4	4	2	2	2
0	51	62	1.67	113	98	89	22.231	81	4.235	5.61159	0.869369	3.36178	1.86191	3.74968	3.01389	0.466924	1.80556	2.01389	2.856	65.416	0.2301	7.99446	177.725	647.552	28.29	19.9955	0.902996	-0.328	1	1	1	1	2	1	0	0	0
0	44	55	1.52	131	87	95	23.8054	74	4.84	4.13757	0.767754	2.45668	1.31885	2.81872	3.13725	0.582138	1.86275	2.13725	2.856	68.952	0.2006	8.0037	190.531	592.274	33.289	12.2841	0.991002	-0.237	1	1	1	2	1	1	0	0	1
1	49	79	1.73	124	91	69	26.3958	94	5.06	6.02534	0.937112	3.87898	1.70675	4.31859	3.5303	0.549062	2.27273	2.5303	5.355	99.008	0.4602	8.24748	217.699	775.263	35.207	27.1762	0.735042	-0.26	1	1	3	2	2	3	0	0	0
0	44	69	1.61	133	74	85	26.6193	86	5.225	4.70649	1.1855	2.767	1.39643	3.31006	3.37037	0.848952	1.98148	2.37037	4.284	72.488	0.3304	8.51469	226.655	732.263	37.951	33.1941	1.57677	-0.071	2	2	3	3	3	2	1	1	2
1	56	74	1.68	154	84	62	26.2188	94	6.765	3.31006	0.812916	1.49987	1.44815	1.86191	2.28571	0.561348	1.03571	1.28571	3.57	83.98	0.295	8.3957	220.125	789.196	37.532	23.5746	0.754299	-0.252	2	1	3	3	2	3	0	0	0
1	50	64	1.64	97	70	73	23.7954	79	5.225	5.53401	1.02744	3.23248	1.83605	3.69796	3.01408	0.559591	1.76056	2.01408	4.641	112.268	0.4307	8.37159	199.205	661.356	31.481	14.3841	0.666056	-0.252	2	1	2	1	1	1	0	0	0
1	58	66	1.58	133	97	92	26.4381	84	5.5	6.10292	2.06616	3.9307	1.21541	4.88751	5.02128	1.69997	3.23404	4.02128	3.927	83.98	0.3717	9.12151	241.155	766.207	40.847	39.2571	2.03187	0.23	3	4	4	3	3	3	2	2	2
1	54	67	1.78	116	74	67	21.1463	81	4.95	5.71502	0.982274	3.85312	1.42229	4.29273	4.01818	0.690628	2.70909	3.01818	4.284	97.24	0.3422	8.27257	174.934	670.078	29.419	15.7164	0.895676	-0.161	1	2	1	1	1	1	0	0	0
1	46	55	1.62	128	85	69	20.9572	74	4.675	6.51668	1.21937	4.44789	1.49987	5.01681	4.34483	0.812986	2.96552	3.34483	2.856	76.908	0.354	8.43164	176.703	623.941	29.05	10.9744	0.967576	-0.092	2	2	1	1	1	1	1	1	1
1	53	66	1.69	145	100	80	23.1084	81	5.28	6.12878	1.17421	3.9307	1.65503	4.47375	3.70312	0.709481	2.375	2.70312	6.426	87.516	0.2891	8.51559	196.782	689.763	31.62	18.7874	0.879294	-0.149	2	2	2	1	2	2	1	0	0
1	50	68	1.64	142	97	78	25.2826	85	4.95	6.80114	0.937112	4.44789	1.91363	4.88751	3.55405	0.489704	2.32432	2.55405	5.712	102.544	0.3894	8.2255	207.962	699.168	32.728	18.7422	0.607036	-0.31	1	1	2	2	2	2	0	0	0
0	54	67	1.59	137	88	82	26.5021	84	5.995	5.55987	1.51293	3.25834	1.60331	3.95656	3.46774	0.943628	2.03226	2.46774	3.927	67.184	0.2419	8.89604	235.764	747.267	37.65	39.3361	1.71623	-0.027	3	2	3	3	3	3	1	1	2
0	46	60	1.56	95	61	60	24.6548	76	4.29	4.26687	0.564525	2.6377	1.37057	2.8963	3.11321	0.41189	1.92453	2.11321	3.927	59.228	0.2596	7.57558	186.775	575.744	33.079	10.1615	0.706232	-0.387	1	1	1	2	1	1	0	0	0
1	52	68	1.7	136	90	75	23.5294	81	4.785	5.45643	4.09845	2.37911	1.18955	4.26687	4.58696	3.44537	2	3.58696	3.927	114.92	0.4484	9.66716	227.463	783.04	38.632	65.5753	4.22975	0.538	4	4	3	3	4	3	3	3	3
0	47	52	1.54	102	84	71	21.9261	71	5.61	5.22369	0.733883	2.61184	2.27567	2.94802	2.29545	0.322491	1.14773	1.29545	3.57	67.184	0.3127	8.10621	177.738	575.541	27.403	9.54048	0.550715	-0.495	1	1	1	1	1	1	0	0	0
1	46	62	1.65	116	80	79	22.7732	81	4.675	6.87872	1.67099	4.80993	1.29299	5.58573	5.32	1.29235	3.72	4.32	5.355	109.616	0.4366	8.74672	199.191	708.484	33.538	26.7359	1.61391	0.111	3	3	2	2	2	2	2	2	2
1	37	72	1.72	123	80	69	24.3375	84	5.5	5.40471	0.67743	3.56866	1.52573	3.87898	3.54237	0.444004	2.33898	2.54237	4.284	86.632	0.3658	8.00637	194.855	672.535	33.193	12.8712	0.555222	-0.357	1	1	2	2	1	1	0	0	0
1	49	61	1.69	141	100	68	21.3578	81	5.28	6.23222	0.462911	3.46522	2.56012	3.6721	2.43434	0.180816	1.35354	1.43434	6.783	96.356	0.3894	7.58477	161.994	614.367	25.339	7.40657	0.233332	-0.745	1	1	1	1	1	1	0	0	0
1	52	82	1.7	134	79	82	28.3737	86	5.665	5.71502	1.5468	3.5428	1.47401	4.24101	3.87719	1.04938	2.40351	2.87719	5.712	91.052	0.295	8.86156	251.435	762.094	40.963	32.4828	1.23389	0.021	3	3	4	3	3	3	1	1	1
0	39	49	1.6	92	66	77	19.1406	71	4.785	3.74968	0.620978	1.91363	1.55159	2.19809	2.41667	0.40022	1.23333	1.41667	4.284	66.3	0.2183	7.78009	148.916	552.387	25.401	8.07271	0.732906	-0.398	1	1	1	1	1	1	0	0	0
0	48	57	1.57	134	85	79	23.1247	71	5.225	5.61159	1.33228	3.69796	1.29299	4.31859	4.34	1.03039	2.86	3.34	4.284	61.88	0.2537	8.63141	199.599	612.83	33.865	17.3196	1.70993	0.013	2	3	2	2	1	1	1	1	2
0	46	58	1.56	122	74	73	23.833	78	4.345	5.40471	0.812916	3.5428	1.49987	3.90484	3.60345	0.541991	2.36207	2.60345	3.927	54.808	0.2596	7.95297	189.543	620.331	31.915	16.2583	0.971908	-0.268	1	1	1	1	1	1	0	0	1
1	52	81	1.7	151	112	79	28.0277	91	9.68	7.39591	6.33397	4.86165	0.827515	6.5684	8.9375	7.65421	5.875	7.9375	4.284	102.544	0.3304	10.8071	302.897	983.442	55.132	164.683	9.59037	0.884	4	4	4	4	4	4	3	3	3
0	47	52	1.6	105	71	74	20.3125	76	4.62	5.01681	0.654849	3.20662	1.49987	3.51694	3.34483	0.436604	2.13793	2.34483	6.426	79.56	0.3127	7.79811	158.399	592.657	27.113	11.7873	0.830555	-0.357	1	1	1	1	1	1	0	0	0
0	38	56	1.63	128	95	83	21.0772	69	4.565	6.54254	1.19679	3.82726	2.17223	4.37031	3.0119	0.550952	1.7619	2.0119	3.927	62.764	0.2891	8.38913	176.819	578.85	26.67	13.1647	0.933551	-0.26	2	1	1	1	1	1	0	0	1
1	39	65	1.7	117	94	60	22.4913	76	5.225	5.55987	0.948402	3.51694	1.60331	3.95656	3.46774	0.591528	2.19355	2.46774	6.783	114.92	0.4012	8.29155	186.488	630.158	30.588	10.4324	0.697591	-0.229	1	2	1	1	1	1	0	0	0
0	49	65	1.58	132	82	79	26.0375	81	4.895	4.44789	1.24196	2.14637	1.73261	2.71528	2.56716	0.716812	1.23881	1.56716	4.284	79.56	0.4012	8.49597	221.214	688.174	35.071	28.565	1.27001	-0.143	2	2	3	2	3	2	1	1	1
0	52	54	1.55	133	84	72	22.4766	76	5.005	5.04267	2.00971	2.48254	1.62917	3.4135	3.09524	1.23358	1.52381	2.09524	3.927	74.256	0.2478	8.9995	202.278	683.962	31.937	36.1748	2.22525	0.09	3	3	2	1	3	2	2	2	2
0	45	65	1.62	125	88	77	24.7676	84	5.005	5.22369	1.53551	3.51694	1.00853	4.21515	5.17949	1.52252	3.48718	4.17949	4.284	69.836	0.2006	8.73037	216.23	733.351	38.958	39.9232	2.87794	0.182	2	3	3	3	3	2	2	2	3
1	52	62	1.63	118	79	111	23.3355	84	6.765	4.60305	1.9081	2.04293	1.68089	2.92216	2.73846	1.13517	1.21538	1.73846	3.57	88.4	0.2478	9.24894	215.828	776.911	33.706	36.2538	1.45152	0.057	4	3	3	2	3	3	1	1	1
1	51	61	1.66	147	96	102	22.1367	76	4.345	6.10292	1.95326	4.16343	1.03439	5.06853	5.9	1.88831	4.025	4.9	5.712	85.748	0.3127	8.82959	195.458	671.049	34.823	21.4858	2.24516	0.276	3	4	2	2	2	1	2	2	2
0	52	53	1.55	119	75	78	22.0604	71	4.785	6.07706	0.824207	4.13757	1.55159	4.52547	3.91667	0.531201	2.66667	2.91667	4.641	59.228	0.3422	8.06322	177.877	572.489	29.684	10.7147	0.904187	-0.276	1	1	1	1	1	1	0	0	0
1	44	68	1.65	120	90	71	24.977	84	7.15	7.73209	9.1566	4.47375	0.905094	6.827	8.54286	10.1167	4.94286	7.54286	4.641	85.748	0.3953	10.8727	271.567	913.303	49.016	173.975	12.4753	1.005	4	4	4	4	4	4	3	3	3
1	50	86	1.7	139	95	62	29.7578	91	4.675	6.23222	2.7323	3.98242	1.00853	5.22369	6.17949	2.70918	3.94872	5.17949	4.998	114.92	0.4189	9.23844	274.916	840.698	48.91	71.0399	3.27902	0.433	4	4	4	4	4	4	3	3	3
1	45	86	1.8	130	97	74	26.5432	107	5.115	5.35299	1.36615	3.5428	1.18955	4.16343	4.5	1.14846	2.97826	3.5	4.641	108.732	0.4602	8.63524	229.207	923.971	39.698	57.3783	1.74468	0.061	2	3	3	3	4	4	2	2	2
0	39	63	1.68	117	70	78	22.3214	74	4.29	4.68063	0.711302	2.94802	1.39643	3.2842	3.35185	0.509371	2.11111	2.35185	4.641	57.46	0.236	7.8067	174.257	577.696	30.154	11.3808	0.898002	-0.292	1	1	1	1	1	1	0	0	0
1	59	72	1.77	137	74	80	22.9819	91	5.775	6.54254	0.632268	2.56012	3.69796	2.84458	1.76923	0.170978	0.692308	0.769231	4.998	84.864	0.2124	7.98616	183.537	726.741	25.854	16.439	0.238745	-0.77	1	1	1	1	1	2	0	0	0
1	60	64	1.61	136	85	69	24.6904	84	4.62	5.76674	0.858078	3.87898	1.49987	4.26687	3.84483	0.572102	2.58621	2.84483	6.426	96.356	0.3009	8.0684	199.212	677.746	33.426	16.3035	0.709894	-0.244	1	1	2	2	1	1	0	0	0
1	58	96	1.65	155	98	69	35.2617	91	5.335	4.29273	1.73874	2.14637	1.34471	2.94802	3.19231	1.29302	1.59615	2.19231	5.355	75.14	0.3422	8.91852	314.482	811.585	52.224	45.2072	1.41218	0.111	3	3	4	4	3	4	2	2	1
1	60	59	1.67	153	103	65	21.1553	81	5.17	4.83579	0.632268	3.36178	1.18955	3.64624	4.06522	0.531518	2.82609	3.06522	6.069	75.14	0.2596	7.8755	166.609	637.915	30.382	10.1163	0.689179	-0.276	1	1	1	1	1	1	0	0	0
1	57	60	1.68	139	97	78	21.2585	81	4.125	4.44789	1.55809	2.68942	1.03439	3.4135	4.3	1.50628	2.6	3.3	4.641	87.516	0.3894	8.55159	181.794	692.679	32.637	24.9294	1.94833	0.179	2	3	1	2	2	2	2	2	2
1	56	71	1.7	158	88	61	24.5675	86	7.04	6.12878	1.40002	3.87898	1.60331	4.52547	3.82258	0.873208	2.41935	2.82258	4.284	82.212	0.4012	8.97916	220.595	772.208	35.364	29.4005	1.11231	-0.06	3	2	3	2	3	3	1	1	1
1	58	70	1.72	151	75	75	23.6614	79	5.555	3.95656	0.858078	2.04293	1.52573	2.43082	2.59322	0.562405	1.33898	1.59322	2.856	81.328	0.2714	8.25271	195.271	651.964	32.654	12.0131	0.671408	-0.252	1	1	2	2	1	1	0	0	0
1	56	67	1.63	123	84	66	25.2174	81	5.335	6.64598	1.16292	4.78407	1.31885	5.32713	5.03922	0.881768	3.62745	4.03922	4.641	88.4	0.3245	8.51629	214.758	689.82	36.521	18.6068	1.04307	-0.056	2	2	1	2	2	2	1	1	1
1	57	74	1.75	141	96	69	24.1633	89	5.115	6.827	1.10647	5.24955	1.06025	5.76674	6.43902	1.04359	4.95122	5.43902	5.355	98.124	0.413	8.42442	203.561	749.773	36.751	26.5553	1.388	0.017	2	3	2	3	2	3	1	1	1
1	56	68	1.71	136	85	63	23.255	81	5.115	6.98216	1.25325	4.93923	1.47401	5.50815	4.73684	0.850228	3.35088	3.73684	3.57	99.008	0.4307	8.54898	198.807	692.468	32.757	20.0519	1.05025	-0.071	2	2	2	2	2	2	1	1	1
1	56	75	1.71	137	88	66	25.6489	87	5.06	6.77528	1.55809	4.49961	1.55159	5.22369	4.36667	1.00419	2.9	3.36667	4.998	107.848	0.4012	8.7559	224.579	761.763	36.176	34.278	1.2641	0	3	3	3	2	3	3	1	1	1
1	56	62	1.68	151	107	78	21.9671	76	4.895	6.4391	3.30812	3.49108	1.42229	5.01681	4.52727	2.32591	2.45455	3.52727	3.57	112.268	0.3953	9.47566	208.153	720.15	33.744	36.3893	2.77634	0.367	4	4	2	2	3	2	3	3	3
1	58	69	1.67	110	73	77	24.7409	89	5.83	3.6721	2.48391	1.21541	1.31885	2.35325	2.78431	1.88339	0.921569	1.78431	7.14	104.312	0.5074	9.36392	231.672	833.389	38.184	59.6139	2.47339	0.274	4	4	3	3	4	4	2	2	3
1	59	60	1.61	131	86	62	23.1473	76	6.49	4.96509	0.67743	2.97388	1.68089	3.2842	2.95385	0.403019	1.76923	1.95385	7.497	80.444	0.3422	8.17188	189.157	621.063	31.557	7.45173	0.468238	-0.398	1	1	1	1	1	1	0	0	0
1	55	52	1.61	113	60	60	20.061	71	4.51	5.24955	0.688721	3.25834	1.68089	3.56866	3.12308	0.409736	1.93846	2.12308	5.355	94.588	0.3186	7.82445	156.966	555.536	26.027	4.13232	0.478064	-0.387	1	1	1	1	1	1	0	0	0
1	53	100	1.8	137	78	80	30.8642	107	7.81	3.05146	1.6597	1.29299	1.00853	2.04293	3.02564	1.64566	1.28205	2.02564	6.783	84.864	0.3186	9.25311	285.59	990.083	51.098	69.7076	2.29215	0.217	4	4	4	4	4	4	2	2	2
1	53	68	1.7	116	76	62	23.5294	82	5.17	4.16343	3.01456	1.96535	0.827515	3.33592	5.03125	3.64291	2.375	4.03125	6.069	92.82	0.3953	9.4374	222.056	773.866	41.553	51.2476	4.52747	0.561	4	4	3	3	4	3	3	3	3
1	53	83	1.72	132	108	60	28.0557	91	5.94	4.80993	1.91939	3.0256	0.905094	3.90484	5.31429	2.12065	3.34286	4.31429	4.641	88.4	0.3776	9.12478	256.002	830.355	47.005	49.904	2.65556	0.326	3	4	4	4	4	4	3	3	3
1	54	80	1.85	139	105	63	23.3747	86	5.445	6.25808	1.95326	4.05999	1.29299	4.96509	4.84	1.51065	3.14	3.84	8.568	103.428	0.4071	9.05526	211.664	778.753	35.343	41.0184	1.97589	0.179	3	3	2	2	3	3	2	2	2
1	52	56	1.61	131	87	76	21.6041	77	7.315	4.91337	2.03229	2.53426	1.44815	3.46522	3.39286	1.40337	1.75	2.39286	3.213	88.4	0.4838	9.39016	202.866	723.042	32.734	24.3875	1.71161	0.146	4	3	2	2	2	2	2	2	2
0	45	44	1.57	105	80	56	17.8506	64	4.51	4.68063	0.45162	2.40497	2.09465	2.58598	2.23457	0.215607	1.14815	1.23457	3.57	62.764	0.2183	7.40245	132.138	473.757	21.602	2.70972	0.368245	-0.658	1	1	1	1	1	1	0	0	0
1	49	71	1.65	157	96	67	26.079	81	5.775	4.70649	0.711302	2.99974	1.37057	3.33592	3.43396	0.518982	2.18868	2.43396	5.712	88.4	0.3422	8.10395	211.343	656.42	36.847	11.3808	0.602707	-0.284	1	1	2	3	1	1	0	0	0
0	39	50	1.53	120	70	92	21.3593	71	5.5	5.50815	0.790335	3.62038	1.52573	3.98242	3.61017	0.518005	2.37288	2.61017	3.927	68.068	0.177	8.16052	174.303	579.397	29.327	10.2744	0.896906	-0.284	1	1	1	1	1	1	0	0	0
1	50	78	1.65	137	101	79	28.6501	99	5.005	6.64598	0.993564	4.75821	1.42229	5.22369	4.67273	0.698566	3.34545	3.67273	4.998	99.008	0.4602	8.29505	237.654	821.21	40.025	33.7812	0.940305	-0.155	1	2	3	3	3	4	0	0	1
1	51	73	1.62	166	112	87	27.8159	94	5.995	5.06853	1.84035	2.87044	1.34471	3.72382	3.76923	1.36859	2.13462	2.76923	4.284	99.892	0.5015	9.09195	252.901	854.643	41.842	53.3702	1.77897	0.137	3	3	4	4	4	4	2	2	2
1	52	75	1.73	116	80	78	25.0593	89	9.13	8.09413	1.40002	5.9219	1.52573	6.5684	5.30508	0.917608	3.88136	4.30508	4.641	73.372	0.3363	9.23912	231.526	822.282	37.628	33.6005	1.19675	-0.036	4	2	3	3	3	4	1	1	1
1	54	74	1.74	162	102	72	24.4418	94	5.555	5.71502	1.95326	3.38764	1.42229	4.29273	4.01818	1.37332	2.38182	3.01818	4.641	90.168	0.3658	9.07526	221.816	853.075	36.147	56.6445	1.91736	0.137	3	3	3	2	4	4	2	2	2
1	52	95	1.73	148	94	80	31.7418	102	5.61	6.64598	2.29197	4.57719	1.00853	5.63745	6.58974	2.27258	4.53846	5.58974	3.213	92.82	0.4071	9.24503	293.454	942.993	52.059	84.803	2.96733	0.356	4	4	4	4	4	4	3	3	3
1	41	67	1.65	134	78	94	24.6097	84	5.665	5.30127	1.33228	3.69796	0.982674	4.31859	5.39474	1.35577	3.76316	4.39474	4.998	83.096	0.3363	8.71227	214.407	731.83	39.109	25.3133	1.68528	0.134	2	3	2	3	2	2	2	2	2
0	39	59	1.6	107	74	86	23.0469	74	4.785	4.08585	1.01615	2.37911	1.24127	2.84458	3.29167	0.818632	1.91667	2.29167	3.213	54.808	0.2773	8.27257	190.657	612.17	33.2	16.2583	1.41853	-0.086	1	2	1	2	1	1	1	1	1
1	37	59	1.63	131	83	81	22.2063	79	5.335	6.54254	1.05002	4.62891	1.42229	5.12025	4.6	0.738257	3.25455	3.6	4.998	95.472	0.4189	8.41416	186.848	664.719	31.367	14.7002	0.910952	-0.131	2	2	1	1	1	1	1	1	0
1	52	67	1.69	115	74	89	23.4586	89	5.39	3.95656	2.9694	1.70675	0.879235	3.07732	4.5	3.37726	1.94118	3.5	6.783	91.052	0.3245	9.46397	222.011	842.294	40.775	71.2657	4.56286	0.529	4	4	3	3	4	4	3	3	3
1	54	80	1.69	131	90	77	28.0102	84	5.28	6.02534	2.83392	3.87898	0.853375	5.17197	7.06061	3.32084	4.54545	6.06061	5.712	102.544	0.3658	9.39665	263.202	789.319	48.815	53.8444	3.84215	0.521	4	4	4	4	4	3	3	3	3
1	46	60	1.67	112	65	62	21.5139	84	4.565	5.17197	1.67099	3.2842	1.11197	4.05999	4.65116	1.50273	2.95349	3.65116	6.069	104.312	0.4484	8.72291	187.663	732.724	32.88	31.7489	2.00364	0.176	2	3	1	2	3	2	2	2	2
1	36	60	1.67	115	71	62	21.5139	79	5.995	6.12878	1.19679	4.08585	1.49987	4.62891	4.08621	0.797931	2.72414	3.08621	3.57	88.4	0.2537	8.66164	186.345	684.27	30.623	16.7551	1.00058	-0.097	2	2	1	1	1	2	1	1	1
0	39	66	1.65	114	69	61	24.2424	76	5.115	4.57719	1.10647	2.53426	1.52573	3.05146	3	0.725206	1.66102	2	3.57	53.04	0.2065	8.42442	204.228	640.256	33.582	19.9165	1.25521	-0.137	2	2	2	2	2	1	1	1	1
1	48	58	1.7	155	98	83	20.0692	81	5.61	5.27541	0.801626	2.79286	2.12051	3.1549	2.4878	0.378035	1.31707	1.4878	7.497	95.472	0.2596	8.19451	164.457	663.755	25.581	12.826	0.503099	-0.42	1	1	1	1	1	1	0	0	0
1	46	67	1.7	114	73	49	23.1834	86	5.225	4.47375	0.45162	2.66356	1.60331	2.87044	2.79032	0.28168	1.66129	1.79032	4.998	86.632	0.2419	7.54961	175.026	649.266	30.543	9.48402	0.370022	-0.553	1	1	1	1	1	1	0	0	0
0	45	56	1.59	131	84	89	22.151	74	4.785	6.62012	0.90324	4.37031	1.83605	4.78407	3.60563	0.491948	2.38028	2.60563	3.57	60.112	0.1947	8.15479	180.637	603.454	28.773	14.4518	0.870847	-0.31	1	1	1	1	1	1	0	0	0
1	52	83	1.8	163	112	86	25.6173	91	5.225	6.33566	1.03873	4.31859	1.55159	4.78407	4.08333	0.669459	2.78333	3.08333	4.641	70.72	0.354	8.38252	214.737	762.809	35.304	27.0069	0.882074	-0.174	2	2	2	2	2	3	0	0	0
1	51	76	1.74	137	84	62	25.1024	94	5.06	6.5684	3.31941	4.00828	1.03439	5.53401	6.35	3.20904	3.875	5.35	4.284	100.776	0.3658	9.51222	238.779	894.149	41.979	96.2628	4.41626	0.507	4	4	3	4	4	4	3	3	3
1	53	63	1.65	151	96	103	23.1405	76	4.565	6.38738	4.29039	2.66356	1.75847	4.62891	3.63235	2.43984	1.51471	2.63235	4.284	92.82	0.472	9.66586	223.673	734.606	34.564	47.1943	2.83511	0.387	4	4	3	2	4	3	3	3	3
1	51	64	1.62	137	90	71	24.3865	85	5.885	5.12025	0.790335	3.4135	1.34471	3.77554	3.80769	0.587736	2.53846	2.80769	4.284	82.212	0.4484	8.22818	200.657	699.395	34.87	15.8067	0.742906	-0.229	1	0	2	2	1	2	0	0	0
1	50	71	1.72	118	81	64	23.9995	81	4.95	7.00802	0.767754	4.00828	2.6377	4.37031	2.65686	0.291069	1.51961	1.65686	4.641	114.92	0.5192	8.02617	192.624	650.12	28.61	12.2841	0.35361	-0.538	1	1	1	1	1	1	0	0	0
1	50	88	1.72	142	95	78	29.7458	117	5.335	5.97362	2.22423	3.6721	1.29299	4.68063	4.62	1.72022	2.84	3.62	5.712	89.284	0.3776	9.16477	272.613	1072.28	45.391	115.66	2.67754	0.236	3	4	4	4	4	4	2	2	3
1	51	78	1.7	130	85	88	26.9896	94	5.17	5.84432	1.29841	3.56866	1.68089	4.16343	3.47692	0.772453	2.12308	2.47692	5.355	83.98	0.3186	8.59508	231.978	807.937	36.943	37.6538	1.02133	-0.114	2	2	3	3	3	4	1	1	1
1	51	75	1.67	129	83	69	26.8923	102	5.005	6.28394	1.77261	3.5428	1.93949	4.34445	3.24	0.913957	1.82667	2.24	5.712	81.328	0.3186	8.87396	238.641	905.144	36.285	65.5865	1.31393	-0.041	3	2	3	2	4	4	1	1	1
1	47	74	1.76	119	91	63	23.8895	86	5.06	5.87018	1.0726	3.8014	1.57745	4.29273	3.72131	0.679957	2.40984	2.72131	5.712	97.24	0.4071	8.38252	200.254	720.897	32.725	22.5246	0.879192	-0.167	2	2	2	2	2	2	0	0	0
1	52	74	1.72	103	73	63	25.0135	86	6.105	4.37031	0.767754	2.79286	1.21541	3.1549	3.59574	0.631682	2.29787	2.59574	6.069	106.964	0.2655	8.23589	206.009	708.287	36.831	16.1228	0.796865	-0.201	1	2	2	3	1	2	0	0	0
1	53	73	1.71	122	81	89	24.9649	86	4.95	4.88751	1.25325	3.20662	1.11197	3.77554	4.39535	1.12705	2.88372	3.39535	3.927	96.356	0.354	8.51619	212.606	732.393	37.649	26.3182	1.42327	0.053	2	3	2	3	2	2	1	1	1
0	47	67	1.52	127	82	65	28.9993	81	4.4	5.06853	0.914531	2.99974	1.65503	3.4135	3.0625	0.552577	1.8125	2.0625	6.069	63.648	0.2301	8.08333	234.411	654.75	38.246	21.0342	0.91906	-0.26	1	1	3	3	2	1	0	0	0
1	51	57	1.68	132	93	101	20.1956	81	5.335	4.00828	0.598397	1.91363	1.81019	2.19809	2.21429	0.330571	1.05714	1.21429	8.568	90.168	0.2773	7.85186	158.573	636	26.195	9.57435	0.438587	-0.481	1	1	1	1	1	1	0	0	0
1	51	83	1.67	132	87	95	29.7608	91	8.415	3.1549	1.45648	1.31885	1.16369	1.99121	2.71111	1.2516	1.13333	1.71111	6.426	95.472	0.354	9.1971	273.713	836.936	47.496	37.8684	1.51476	0.097	4	3	4	4	3	4	2	2	2
1	50	78	1.67	119	78	63	27.968	97	5.06	6.4391	1.52422	4.60305	1.13783	5.30127	5.65909	1.33958	4.04545	4.65909	6.783	96.356	0.3776	8.73392	244.27	847.19	42.612	48.775	1.79127	0.127	2	3	4	4	4	4	2	2	2
1	46	68	1.7	130	84	88	23.5294	84	5.335	5.84432	0.90324	3.4135	2.01707	3.82726	2.89744	0.447799	1.69231	1.89744	4.284	79.56	0.3186	8.26359	194.437	694.142	30.316	17.1616	0.570105	-0.347	1	1	2	1	1	2	0	0	0
1	53	74	1.65	160	115	74	27.1809	81	5.72	5.04267	1.10647	2.74114	1.78433	3.25834	2.82609	0.620104	1.53623	1.82609	4.284	89.284	0.4956	8.53621	232.022	691.433	36.741	17.7035	0.703709	-0.208	2	2	3	3	1	2	0	0	0
1	37	75	1.82	156	96	97	22.6422	81	5.775	4.75821	1.43389	2.84458	1.26713	3.49108	3.7551	1.13161	2.2449	2.7551	4.284	70.72	0.3599	8.805	199.365	713.205	33.857	22.9423	1.4174	0.053	3	3	2	2	2	2	1	1	1
1	50	85	1.76	132	81	51	27.4406	86	5.115	4.49961	1.71616	2.04293	1.68089	2.81872	2.67692	1.02098	1.21538	1.67692	5.712	114.92	0.3068	8.86333	243.215	762.247	38.277	36.0393	1.22357	0.009	3	3	4	3	3	3	1	1	1
0	44	57	1.56	119	99	76	23.4221	76	5.115	5.37885	0.959693	3.4135	1.52573	3.85312	3.52542	0.629005	2.23729	2.52542	3.927	60.996	0.2537	8.2821	193.984	629.44	32.177	17.2745	1.10958	-0.201	1	2	2	2	1	1	0	0	1
1	46	103	1.74	144	95	79	34.0203	107	4.95	6.5684	1.86293	4.68063	1.03439	5.53401	6.35	1.80099	4.525	5.35	4.641	74.256	0.3481	8.91261	303.21	953.649	53.891	78.2432	2.36488	0.255	3	4	4	4	4	4	2	2	2
1	51	68	1.7	138	97	60	23.5294	87	5.39	4.18929	0.620978	2.09465	1.81019	2.37911	2.31429	0.343046	1.15714	1.31429	4.998	94.588	0.3776	7.89915	185.862	687.226	30.602	13.6615	0.452339	-0.469	1	1	1	1	1	2	0	0	0
1	50	56	1.72	129	100	110	18.9292	76	5.83	2.92216	0.914531	1.21541	1.29299	1.62917	2.26	0.707298	0.94	1.26	3.57	71.604	0.3776	8.36474	158.337	635.72	27.486	10.0598	0.908336	-0.149	2	2	1	1	1	1	1	0	0
1	50	74	1.66	140	106	66	26.8544	81	5.28	7.29247	2.65327	4.60305	1.47401	5.81846	4.94737	1.80003	3.12281	3.94737	6.783	82.212	0.5251	9.33079	250.573	755.794	40.223	42.4523	2.05663	0.255	4	4	4	3	3	3	2	2	2
1	50	80	1.75	152	113	104	26.1224	89	5.005	4.96509	0.880659	2.97388	1.57745	3.38764	3.14754	0.55828	1.88525	2.14754	5.712	96.356	0.354	8.17442	213.536	727.523	35.332	21.1358	0.711724	-0.252	1	1	2	2	2	2	0	0	0
1	52	82	1.7	144	106	74	28.3737	91	4.84	5.68916	1.36615	3.36178	1.70675	3.98242	3.33333	0.80044	1.9697	2.33333	4.641	102.544	0.4838	8.57998	243.446	780.778	38.555	35.5199	0.995901	-0.097	2	2	4	3	3	3	1	1	1
1	49	70	1.71	128	84	87	23.939	86	5.5	7.42177	5.08073	4.62891	1.37057	6.0512	5.41509	3.70701	3.37736	4.41509	4.284	83.98	0.4602	10.0213	239.899	861.829	39.055	106.695	4.78794	0.569	4	4	4	3	4	4	3	3	3
1	50	70	1.72	131	104	98	23.6614	86	4.62	4.44789	1.86293	1.96535	1.62917	2.81872	2.73016	1.14349	1.20635	1.73016	6.069	82.212	0.3717	8.84362	209.253	760.551	33.168	39.1216	1.48607	0.057	3	3	2	2	3	3	1	1	2
1	51	70	1.72	136	100	68	23.6614	79	5.5	4.96509	3.03715	2.6377	0.930954	4.03413	5.33333	3.2624	2.83333	4.33333	5.712	93.704	0.4071	9.50673	224.943	751.032	40.609	42.52	3.89471	0.513	4	4	3	3	3	3	3	3	3
1	49	55	1.72	129	92	83	18.5911	74	4.455	5.35299	0.993564	2.58598	2.30153	3.05146	2.32584	0.431698	1.1236	1.32584	4.284	87.516	0.3658	8.17864	152.05	605.219	22.868	8.94208	0.544408	-0.367	1	1	1	1	1	1	0	0	0
1	53	78	1.68	112	88	80	27.6361	86	5.445	4.88751	0.90324	3.23248	1.24127	3.64624	3.9375	0.727673	2.60417	2.9375	6.069	108.732	0.3894	8.284	228.937	712.424	40.181	18.968	0.868568	-0.137	1	2	3	3	2	2	1	1	0
1	46	70	1.75	122	77	72	22.8571	81	5.225	6.46496	2.2581	4.18929	1.24127	5.22369	5.20833	1.81918	3.375	4.20833	4.284	91.052	0.3894	9.15905	209.35	741.883	35.231	36.1296	2.26749	0.26	3	4	2	2	3	3	2	2	2
1	58	94	1.8	122	94	80	29.0123	102	5.5	6.64598	1.8968	4.39617	1.37057	5.27541	4.84906	1.38395	3.20755	3.84906	4.998	113.152	0.4897	9.03599	262.155	921.671	43.169	70.1818	1.90545	0.14	3	3	4	4	4	4	2	2	2
1	48	63	1.65	129	95	56	23.1405	74	5.005	6.67184	2.021	3.98242	1.75847	4.91337	3.79412	1.1493	2.26471	2.79412	4.998	103.428	0.4484	9.0051	208.382	666.377	32.295	18.189	1.30034	0.061	3	3	2	2	2	1	2	2	1
1	47	80	1.69	127	85	71	28.0102	91	5.335	3.64624	2.91295	1.52573	0.775795	2.87044	4.7	3.75479	1.96667	3.7	4.998	92.82	0.3127	9.43452	264.263	858.542	50.348	75.7367	4.70625	0.574	4	4	4	4	4	4	3	3	3
1	49	69	1.67	115	78	85	24.7409	86	5.06	6.87872	1.58067	4.93923	1.21541	5.6633	5.65957	1.30052	4.06383	4.65957	6.069	112.268	0.4779	8.77028	216.985	754.244	37.145	33.1941	1.65036	0.114	3	3	3	3	3	3	2	2	2
1	53	69	1.72	125	100	65	23.3234	81	5.28	5.48229	0.496782	3.5428	1.70675	3.77554	3.21212	0.291069	2.07576	2.21212	5.712	97.24	0.3422	7.65539	178.55	620.087	30.412	7.94852	0.358991	-0.538	1	1	1	1	1	1	0	0	0
1	53	72	1.7	128	70	103	24.9135	86	13.53	3.6721	1.5468	1.96535	1.00853	2.66356	3.64103	1.53371	1.94872	2.64103	4.284	85.748	0.3186	9.73217	242.462	836.966	43.816	32.4828	1.93898	0.185	4	3	4	4	3	4	2	2	2
1	52	68	1.62	114	78	80	25.9107	84	4.785	6.49082	2.24681	4.26687	1.18955	5.30127	5.45652	1.88879	3.58696	4.45652	4.641	107.848	0.5015	9.06607	234.908	761.55	40.074	42.6894	2.28288	0.276	3	4	3	3	3	3	2	2	2
1	47	72	1.8	125	97	99	22.2222	84	6.215	3.07732	0.779045	1.86191	0.853375	2.22395	3.60606	0.912899	2.18182	2.60606	3.927	70.72	0.3304	8.26835	183.741	694.541	36.14	14.8019	1.1973	-0.041	1	2	1	2	1	2	1	1	1
1	46	70	1.64	129	83	76	26.0262	86	5.115	6.87872	0.970983	5.24955	1.18955	5.68916	5.78261	0.816259	4.41304	4.78261	4.998	89.284	0.4366	8.2938	215.856	713.267	38.112	20.3907	1.00759	-0.086	1	2	3	3	2	2	1	1	1
1	47	66	1.64	136	88	63	24.539	79	4.675	5.17197	1.20808	2.8963	1.73261	3.43936	2.98507	0.697263	1.67164	1.98507	4.998	89.284	0.3481	8.42233	206.675	665.364	32.824	16.9132	0.816401	-0.155	2	2	2	2	1	1	0	0	0
1	53	58	1.62	132	90	81	22.1003	84	5.5	3.69796	1.1855	1.68089	1.47401	2.22395	2.50877	0.80427	1.14035	1.50877	3.57	83.98	0.3835	8.56598	189.311	719.543	31.268	22.5246	1.05781	-0.097	2	2	1	1	2	2	1	1	1
1	47	63	1.62	135	93	80	24.0055	79	5.005	6.1805	4.6404	2.74114	1.31885	4.86165	4.68627	3.51851	2.07843	3.68627	5.712	88.4	0.413	9.83631	236.125	777.068	38.992	64.9656	4.16842	0.547	4	4	3	3	4	3	3	3	3
1	50	70	1.65	133	90	76	25.7117	92	6.05	5.14611	1.41131	3.2842	1.21541	3.9307	4.23404	1.16118	2.70213	3.23404	5.355	99.892	0.4484	8.83565	227.179	812.88	39.021	38.1055	1.54366	0.064	3	3	3	3	3	4	2	2	2
1	48	67	1.68	114	89	73	23.7387	91	4.565	5.7926	2.92424	3.20662	1.24127	4.55133	4.66667	2.35584	2.58333	3.66667	4.641	93.704	0.5074	9.28252	220.355	844.709	37.114	76.0303	3.23407	0.373	4	4	3	3	4	4	3	3	3
1	56	65	1.62	135	92	68	24.7676	91	4.675	3.2842	0.869369	1.70675	1.18955	2.09465	2.76087	0.730837	1.43478	1.76087	3.927	101.66	0.354	8.09331	200.452	736.491	35.644	22.6036	0.980781	-0.137	1	2	2	2	2	3	1	1	1
1	49	84	1.65	144	101	73	30.854	91	5.72	8.48203	2.03229	6.0512	1.49987	6.98216	5.65517	1.35498	4.03448	4.65517	5.712	114.036	0.4779	9.1442	282.135	832.122	45.29	52.8396	1.60538	0.13	3	3	4	4	4	4	2	2	2
1	47	62	1.63	136	105	92	23.3355	79	4.62	4.44789	1.15163	2.61184	1.31885	3.12904	3.37255	0.873208	1.98039	2.37255	4.284	93.704	0.3127	8.36264	195.146	660.649	33.233	16.1228	1.0501	-0.06	2	2	2	2	1	1	1	1	1
1	41	62	1.72	118	78	69	20.9573	81	5.17	5.37885	0.66614	2.74114	2.32739	3.05146	2.31111	0.286218	1.17778	1.31111	4.998	91.936	0.2301	7.92769	166.143	642.142	25.663	10.6582	0.372865	-0.538	1	1	1	1	1	1	0	0	0
1	49	66	1.7	122	80	75	22.8374	81	5.06	6.20636	1.40002	3.82726	1.73261	4.47375	3.58209	0.808043	2.20896	2.58209	4.641	93.704	0.3658	8.64892	197.519	700.563	31.126	22.4004	1.00762	-0.092	2	2	2	1	2	2	1	1	1
1	52	67	1.66	132	85	79	24.3141	86	4.785	5.32713	1.24196	3.64624	1.11197	4.21515	4.7907	1.11689	3.27907	3.7907	5.355	83.096	0.3186	8.47324	206.019	728.699	36.511	26.0811	1.43065	0.049	2	3	2	2	2	2	1	1	1
1	53	66	1.67	125	81	75	23.6652	86	5.335	6.46496	1.79519	4.60305	1.03439	5.43057	6.25	1.7355	4.45	5.25	3.57	83.98	0.4897	8.95047	211.815	769.74	37.643	37.699	2.25526	0.241	3	4	2	3	3	3	2	2	2
1	50	71	1.64	129	89	76	26.398	86	4.73	4.49961	0.67743	2.43082	1.75847	2.74114	2.55882	0.385239	1.38235	1.55882	5.355	81.328	0.354	7.85554	207.37	675.577	34.078	14.226	0.471814	-0.409	1	1	2	2	1	1	0	0	0
1	55	80	1.81	122	81	80	24.4193	94	4.51	6.0512	1.06131	4.18929	1.37057	4.68063	4.41509	0.774354	3.0566	3.41509	2.856	92.82	0.3658	8.25687	201.627	776.145	34.154	30.7779	1.08165	-0.114	1	2	2	2	3	3	1	1	1
0	48	82	1.58	102	84	91	32.8473	97	10.78	3.6721	0.948402	1.73261	1.49987	2.17223	2.44828	0.632323	1.15517	1.44828	3.927	67.184	0.2478	9.01578	296.144	874.531	49.88	36.9877	1.1666	-0.201	3	2	4	4	3	4	0	0	1
0	50	58	1.56	117	63	75	23.833	79	4.895	4.75821	0.609687	2.45668	2.01707	2.74114	2.35897	0.302264	1.21795	1.35897	4.641	67.184	0.2242	7.78447	185.527	614.973	29.792	12.8034	0.548975	-0.523	1	1	1	1	1	1	0	0	0
0	47	62	1.72	124	83	84	20.9573	81	5.885	3.98242	1.24196	2.79286	0.775795	3.20662	5.13333	1.60088	3.6	4.13333	2.856	79.56	0.2301	8.68016	181.913	703.093	35.624	28.565	3.19381	0.204	2	3	1	2	3	2	2	2	3
1	52	70	1.67	132	86	82	25.0995	84	5.445	5.09439	6.54849	2.30153	1.03439	4.05999	4.925	6.33076	2.225	3.925	6.426	70.72	0.4425	10.265	257.646	862.26	45.294	124.421	7.78599	0.801	4	4	4	4	4	4	3	3	3
1	38	75	1.64	135	91	83	27.8852	84	4.84	4.99095	3.27425	2.66356	0.827515	4.16343	6.03125	3.95672	3.21875	5.03125	4.998	93.704	0.4897	9.45407	263.629	794.142	49.444	62.2107	4.58955	0.598	4	4	4	4	4	3	3	3	3
1	57	100	1.61	131	86	75	38.5788	119	6.05	4.16343	1.25325	2.14637	1.44815	2.71528	2.875	0.865411	1.48214	1.875	5.712	70.72	0.3304	8.71686	336.286	1037.31	55.609	67.6753	1.16729	-0.06	2	2	4	4	4	4	1	1	1
1	55	73	1.61	135	98	78	28.1625	86	5.61	4.88751	1.34357	3.31006	0.956814	3.9307	5.10811	1.40421	3.45946	4.10811	5.712	106.08	0.5251	8.71095	245.322	749.142	45.057	28.215	1.65819	0.146	2	3	4	4	2	3	2	2	2
1	51	83	1.67	106	71	72	29.7608	86	5.665	4.83579	1.16292	2.04293	2.24981	2.58598	2.14943	0.516899	0.908046	1.14943	6.069	91.936	0.3658	8.57631	255.238	737.563	38.206	24.4214	0.591211	-0.284	2	1	4	3	2	3	0	0	0
1	54	75	1.8	136	78	76	23.1481	86	4.895	5.40471	1.14034	3.51694	1.37057	4.03413	3.9434	0.832019	2.56604	2.9434	3.57	98.124	0.4189	8.41061	194.69	723.312	32.835	23.9472	1.09383	-0.081	2	2	2	2	2	2	1	1	1
1	52	59	1.65	129	83	80	21.6713	81	5.225	3.77554	1.0726	1.57745	1.70675	2.06879	2.21212	0.628445	0.924242	1.21212	4.998	78.676	0.3953	8.41461	182.355	681.583	29.236	17.1616	0.805029	-0.201	2	2	1	1	1	2	0	0	0
1	49	72	1.8	118	77	67	22.2222	81	5.72	4.83579	0.993564	2.94802	1.42229	3.4135	3.4	0.698566	2.07273	2.4	4.998	90.168	0.4189	8.42858	187.302	682.715	31.552	15.897	0.883475	-0.155	2	2	1	1	1	2	0	0	0
1	53	83	1.68	134	81	93	29.4076	97	21.395	6.25808	1.53551	4.18929	1.37057	4.88751	4.56604	1.12034	3.0566	3.56604	6.426	76.024	0.3599	10.1831	299.46	987.759	50.503	49.1363	1.45542	0.049	4	3	4	4	4	4	1	1	1
0	38	43	1.57	103	82	92	17.4449	71	10.065	4.00828	0.519363	2.43082	1.34471	2.66356	2.98077	0.386226	1.80769	1.98077	3.927	53.04	0.2124	8.34498	145.578	592.494	26.576	6.75172	0.739871	-0.409	1	1	1	1	1	1	0	0	0
1	45	90	1.8	181	120	84	27.7778	107	4.73	4.21515	1.86293	2.37911	0.982674	3.23248	4.28947	1.89578	2.42105	3.28947	5.712	89.284	0.4897	8.86715	246.31	948.785	44.448	78.2432	2.80724	0.279	3	4	4	4	4	4	2	2	3
1	43	64	1.7	143	101	79	22.1453	84	5.94	4.86165	4.69685	2.35325	1.18955	3.6721	4.08696	3.94842	1.97826	3.08696	5.355	108.732	0.413	10.0197	221.889	841.652	37.309	89.2401	5.1877	0.597	4	4	3	3	4	4	3	3	3
1	38	87	1.73	149	97	69	29.0688	89	5.335	8.68891	1.0726	6.23222	1.96535	6.72356	4.42105	0.545755	3.17105	3.42105	5.355	83.98	0.4602	8.43544	245.208	750.754	38.036	25.7424	0.6549	-0.26	2	1	4	3	2	3	0	0	0
0	39	47	1.6	124	92	99	18.3594	60	4.95	4.00828	1.12905	1.65503	1.83605	2.17223	2.1831	0.614935	0.901408	1.1831	3.927	69.836	0.2596	8.41183	154.436	504.71	24.27	2.2581	0.971351	-0.215	2	2	1	1	1	1	0	0	1
1	46	70	1.75	121	85	61	22.8571	84	5.28	4.21515	2.91295	1.60331	1.26713	2.94802	3.32653	2.29885	1.26531	2.32653	6.783	92.82	0.3481	9.42416	215.409	791.629	35.885	55.3461	2.97149	0.362	4	4	3	2	4	3	3	3	3
0	36	50	1.63	146	98	89	18.8189	71	4.62	5.7926	0.767754	3.12904	2.30153	3.49108	2.51685	0.333585	1.35955	1.51685	2.856	61.88	0.2655	7.95718	149.746	564.96	22.909	9.98081	0.616028	-0.481	1	1	1	1	1	1	0	0	0
1	37	77	1.7	132	75	68	26.6436	86	5.555	4.39617	1.28712	2.37911	1.42229	2.97388	3.09091	0.904961	1.67273	2.09091	2.856	89.284	0.4484	8.65817	230.685	744.603	38.263	27.0295	1.10263	-0.046	2	2	3	3	2	3	1	1	1
0	59	49	1.53	120	86	73	20.9321	74	4.235	4.75821	1.00485	2.53426	1.75847	2.99974	2.70588	0.571437	1.44118	1.70588	3.927	62.764	0.2891	8.13929	170.373	602.308	27.247	16.0777	1.04216	-0.244	1	1	1	1	1	1	0	0	1
1	54	73	1.7	139	101	76	25.2595	84	5.005	5.06853	2.05487	3.18076	0.956814	4.11171	5.2973	2.14762	3.32432	4.2973	4.284	106.964	0.3068	9.02172	227.884	757.824	41.253	39.0426	2.63217	0.332	3	4	3	3	3	3	3	3	3
0	45	54	1.6	121	69	75	21.0937	72	5.06	5.48229	1.12905	3.23248	1.73261	3.74968	3.16418	0.651647	1.86567	2.16418	4.641	79.56	0.2596	8.43381	177.901	607.234	28.334	15.8067	1.15171	-0.187	2	2	1	1	1	1	0	0	1
0	48	50	1.57	125	92	89	20.2848	71	4.73	5.58573	0.90324	3.2842	1.88777	3.69796	2.9589	0.47847	1.73973	1.9589	2.856	53.04	0.177	8.14323	165.184	578.169	26.136	11.7421	0.85091	-0.319	1	1	1	1	1	1	0	0	0
1	49	60	1.65	146	91	62	22.0386	76	5.225	4.70649	8.084	1.60331	1.03439	3.6721	4.55	7.81521	1.55	3.55	7.14	92.82	0.5074	10.4344	229.959	793.015	40.682	88.924	9.31323	0.893	4	4	3	3	4	3	3	3	3
1	35	66	1.7	118	70	65	22.8374	81	5.115	4.47375	0.982274	2.92216	1.11197	3.36178	4.02326	0.883361	2.62791	3.02326	5.355	99.008	0.2183	8.30536	189.673	672.734	34.064	15.7164	1.10155	-0.056	1	2	1	2	1	1	1	1	1
1	50	66	1.64	126	83	69	24.539	81	5.445	6.23222	1.12905	4.26687	1.44815	4.78407	4.30357	0.77965	2.94643	3.30357	5.355	103.428	0.3422	8.50714	208.756	689.079	34.732	18.0648	0.935975	-0.108	2	2	2	2	2	2	1	1	1
0	48	55	1.57	117	73	80	22.3133	74	4.895	5.01681	0.948402	2.61184	1.96535	3.05146	2.55263	0.482562	1.32895	1.55263	3.927	70.72	0.2655	8.22631	183.556	608.747	28.686	15.1744	0.850906	-0.319	1	1	1	1	1	1	0	0	0
0	35	52	1.62	117	73	99	19.8141	69	4.785	5.27541	0.959693	3.2842	1.55159	3.72382	3.4	0.618522	2.11667	2.4	4.284	68.952	0.2537	8.21541	162.781	566.863	26.886	10.5566	1.08184	-0.208	1	2	1	1	1	1	0	0	1
1	35	76	1.71	117	72	62	25.9909	81	5.445	4.62891	2.05487	2.87044	0.827515	3.8014	5.59375	2.48318	3.46875	4.59375	5.355	104.312	0.4779	9.10598	236.673	737.584	44.546	32.8779	2.88918	0.394	3	4	3	4	3	3	3	3	3
1	62	66	1.63	165	98	62	24.841	81	6.16	4.96509	1.06131	2.97388	1.49987	3.46522	3.31034	0.707599	1.98276	2.31034	4.641	97.24	0.3953	8.56865	212.854	694.06	35.25	16.9809	0.843894	-0.149	2	2	2	2	1	2	1	0	0
1	59	83	1.8	123	83	68	25.6173	86	4.84	7.44763	0.914531	4.70649	2.32739	5.12025	3.2	0.392943	2.02222	2.2	4.998	95.472	0.4071	8.17864	209.515	703.363	31.594	19.2051	0.489292	-0.409	1	1	2	1	2	2	0	0	0
1	60	62	1.72	124	70	64	20.9573	81	5.225	6.85286	2.19036	4.34445	1.49987	5.35299	4.56897	1.46036	2.89655	3.56897	5.712	107.848	0.354	9.12859	191.31	739.416	30.717	35.0457	1.90246	0.164	3	3	1	1	3	3	2	2	2
0	40	56	1.57	138	85	86	22.719	74	4.565	4.31859	1.50164	2.06879	1.55159	2.767	2.78333	0.967805	1.33333	1.78333	2.856	71.604	0.1947	8.61604	195.748	637.587	31.632	24.0262	1.69008	-0.013	2	3	2	1	2	1	1	1	2
1	57	75	1.75	130	73	76	24.4898	91	6.93	3.4135	1.11776	1.86191	1.03439	2.37911	3.3	1.08059	1.8	2.3	3.927	87.516	0.2714	8.73825	213.998	795.181	38.909	29.0618	1.45899	0.033	3	3	2	3	3	4	1	1	1
1	42	76	1.66	140	90	60	27.5802	81	4.95	4.26687	2.00971	1.75847	1.57745	2.68942	2.70492	1.27402	1.11475	1.70492	4.641	81.328	0.59	8.98845	247.903	728.064	39.453	32.1554	1.43394	0.104	3	3	4	3	3	2	2	2	1
1	52	87	1.72	138	84	66	29.4078	91	4.895	6.10292	1.47906	4.29273	1.13783	4.96509	5.36364	1.29989	3.77273	4.36364	4.284	93.704	0.3127	8.67069	254.986	789.032	44.558	38.4555	1.5842	0.114	2	3	4	4	3	3	2	2	2
1	40	91	1.69	140	97	76	31.8616	97	4.345	9.15438	4.77588	6.59426	1.18955	7.96483	7.69565	4.01486	5.54348	6.69565	5.355	93.704	0.4838	9.72367	309.812	943.196	52.964	152.828	4.97398	0.603	4	4	4	4	4	4	3	3	3
1	48	74	1.75	118	80	60	24.1633	84	5.665	5.55987	1.41131	2.8963	2.01707	3.5428	2.75641	0.699686	1.4359	1.75641	6.069	82.212	0.2714	8.7699	211.909	736.671	32.175	26.8149	0.878317	-0.155	3	2	2	2	2	3	0	0	0
1	51	64	1.7	150	76	60	22.1453	81	5.39	5.87018	2.58553	3.49108	1.18955	4.68063	4.93478	2.17353	2.93478	3.93478	3.927	85.748	0.3953	9.32554	206.517	755.369	35.013	41.3684	2.75374	0.336	4	4	2	2	3	3	3	3	3
1	51	61	1.68	120	100	76	21.6128	79	4.95	6.0512	1.1855	4.05999	1.44815	4.60305	4.17857	0.818632	2.80357	3.17857	3.927	86.632	0.3658	8.46062	182.858	668.389	30.345	16.597	1.02416	-0.086	2	2	1	1	1	1	1	1	1
1	49	64	1.7	123	72	76	22.1453	81	4.84	6.64598	2.33713	4.13757	1.44815	5.19783	4.58929	1.61387	2.85714	3.58929	4.641	87.516	0.354	9.11691	201.897	738.47	32.73	37.3942	2.04469	0.207	3	3	2	2	3	3	2	2	2
1	45	58	1.64	150	87	80	21.5645	76	5.335	5.32713	1.99842	2.81872	1.60331	3.72382	3.32258	1.24643	1.75806	2.32258	3.57	95.472	0.4543	9.05771	195.325	688.386	30.906	21.9826	1.50185	0.097	3	3	2	1	2	2	2	2	2
1	59	71	1.72	148	94	94	23.9995	86	21.23	6.0512	1.4226	3.8014	1.60331	4.44789	3.77419	0.887292	2.37097	2.77419	5.712	96.356	0.2773	10.099	242.37	868.512	39.544	29.8747	1.14448	-0.051	4	2	4	3	3	4	1	1	1
1	54	53	1.63	105	75	74	19.9481	76	5.17	5.06853	0.632268	2.84458	1.93949	3.12904	2.61333	0.325998	1.46667	1.61333	6.426	94.588	0.3481	7.8755	157.101	598.538	25.401	6.95495	0.408267	-0.481	1	1	1	1	1	1	0	0	0
1	54	53	1.68	148	84	100	18.7783	76	4.345	5.09439	1.85164	2.35325	1.88777	3.20662	2.69863	0.980863	1.24658	1.69863	4.284	88.4	0.3953	8.77617	164.802	666.989	25.276	20.3681	1.26442	-0.009	3	3	1	1	2	1	1	1	1
1	50	78	1.7	130	70	70	26.9896	86	5.5	5.17197	1.20808	3.33592	1.29299	3.87898	4	0.934332	2.58	3	4.284	70.72	0.4484	8.58485	231.702	738.297	39.511	25.3698	1.13023	-0.032	2	2	3	3	2	3	1	1	1
1	44	76	1.67	129	83	81	27.2509	76	4.785	7.00802	1.52422	4.62891	1.68089	5.32713	4.16923	0.906793	2.75385	3.16923	7.854	106.08	0.3363	8.67804	236.484	659.531	37.495	16.7664	0.964131	-0.041	2	2	3	3	1	1	1	1	1
1	52	94	1.64	150	91	85	34.9494	97	5.5	5.48229	2.84521	3.36178	0.827515	4.65477	6.625	3.43826	4.0625	5.625	4.284	95.472	0.5369	9.44145	329.973	915.821	61.653	91.0466	4.025	0.537	4	4	4	4	4	4	3	3	3
1	38	79	1.7	148	114	70	27.3356	86	5.005	7.68037	2.93553	5.09439	1.24127	6.4391	6.1875	2.36494	4.10417	5.1875	7.854	109.616	0.3658	9.37839	256.364	806.542	43.019	61.6462	2.84035	0.373	4	4	4	4	4	4	3	3	3
1	46	73	1.67	144	98	80	26.1752	86	11.66	4.96509	2.32584	2.68942	1.21541	3.74968	4.08511	1.91363	2.21277	3.08511	6.783	83.98	0.2124	9.99132	261.525	859.253	43.829	48.8427	2.35472	0.281	4	4	4	4	4	4	2	2	2
1	50	60	1.63	160	80	86	22.5827	86	5.225	4.99095	7.07915	2.61184	0.801655	4.18929	6.22581	8.83066	3.25806	5.22581	2.856	74.256	0.4779	10.3017	232.64	885.944	44.132	148.662	11.7597	0.946	4	4	3	4	4	4	3	3	3
1	48	60	1.7	130	90	90	20.7612	79	4.785	5.68916	0.598397	3.51694	1.88777	3.8014	3.0137	0.316986	1.86301	2.0137	6.783	87.516	0.3599	7.74305	160.755	611.701	26.249	8.37755	0.404637	-0.495	1	1	1	1	1	1	0	0	0
1	49	72	1.7	152	95	75	24.9135	81	5.17	6.36152	1.09518	3.95656	1.91363	4.44789	3.32432	0.572305	2.06757	2.32432	6.426	103.428	0.3304	8.42486	209.893	682.414	32.714	17.5229	0.681465	-0.244	2	1	2	2	1	2	0	0	0
1	60	64	1.68	140	85	76	22.6757	86	5.17	6.33566	1.27583	4.52547	1.21541	5.12025	5.21277	1.04971	3.7234	4.21277	7.497	86.632	0.2655	8.57754	194.502	737.668	33.619	26.7924	1.39491	0.021	2	3	2	2	2	3	1	1	1
1	60	76	1.7	137	78	74	26.2976	91	4.95	3.87898	0.993564	1.68089	1.73261	2.14637	2.23881	0.57345	0.970149	1.23881	3.927	89.284	0.4661	8.284	217.849	753.844	34.971	25.8327	0.744729	-0.244	1	1	3	2	2	3	0	0	0
1	58	69	1.66	149	86	74	25.0399	102	6.05	7.47349	4.94524	5.35299	0.801655	6.67184	9.32258	6.16879	6.67742	8.32258	3.927	95.472	0.4484	10.0896	252.642	1029.13	47.318	182.974	9.22443	0.79	4	4	4	4	4	4	3	3	3
1	58	56	1.65	130	80	60	20.5693	76	5.335	5.63745	1.5468	3.69796	1.24127	4.39617	4.54167	1.24614	2.97917	3.54167	4.284	91.052	0.3422	8.80154	181.042	668.917	30.83	17.0148	1.53735	0.097	3	3	1	1	1	1	2	2	2
1	56	63	1.69	142	88	90	22.0581	86	5.94	6.28394	1.58067	4.18929	1.37057	4.91337	4.58491	1.15329	3.0566	3.58491	3.927	92.82	0.4366	8.93063	196.992	768.034	32.643	33.1941	1.55449	0.061	3	3	2	2	3	3	2	2	2
1	57	70	1.7	130	70	90	24.2215	79	5.555	5.37885	1.27583	3.2842	1.49987	3.87898	3.58621	0.850625	2.18966	2.58621	5.355	103.428	0.4602	8.64936	209.5	683.3	34.313	17.8616	1.00294	-0.071	2	2	2	2	2	2	1	1	1
1	56	82	1.66	115	90	70	29.7576	86	9.35	4.68063	2.74359	2.14637	1.26713	3.4135	3.69388	2.1652	1.69388	2.69388	5.712	91.936	0.2301	9.93571	295.663	854.471	48.696	57.6154	2.47664	0.336	4	4	4	4	4	4	3	3	3
1	51	56	1.65	144	86	86	20.5693	76	5.72	5.43057	1.29841	3.05146	1.78433	3.64624	3.04348	0.727673	1.71014	2.04348	2.856	77.792	0.2832	8.69618	178.875	660.909	28.069	14.2825	0.897724	-0.137	2	2	1	1	1	1	1	1	0
1	49	59	1.71	133	83	84	20.1771	76	5.225	4.73235	1.45648	2.56012	1.49987	3.23248	3.15517	0.971067	1.7069	2.15517	4.641	90.168	0.4602	8.72054	175.956	662.761	28.652	16.0212	1.20938	-0.013	2	3	1	1	1	1	1	1	1
1	48	78	1.78	140	95	73	24.6181	84	4.95	4.88751	1.35486	2.61184	1.65503	3.23248	2.95312	0.818632	1.57812	1.95312	4.284	97.24	0.3304	8.59415	211.572	721.909	33.766	25.7424	1.01741	-0.086	2	2	2	2	2	2	1	1	1
1	47	70	1.79	140	83	64	21.847	84	5.005	4.42203	1.85164	2.6377	0.930954	3.49108	4.75	1.98897	2.83333	3.75	5.712	106.08	0.413	8.91758	194.822	749.077	35.648	35.1812	2.6314	0.299	3	4	2	2	3	3	3	3	3
1	52	78	1.62	140	80	61	29.7211	86	4.95	6.9563	3.81619	3.95656	1.24127	5.71502	5.60417	3.07442	3.1875	4.60417	4.998	105.196	0.4366	9.62971	286.205	828.155	47.982	80.14	3.51916	0.487	4	4	4	4	4	4	3	3	3
1	43	72	1.6	120	80	72	28.125	81	4.895	4.75821	1.80648	2.8963	1.03439	3.72382	4.6	1.74642	2.8	3.6	4.284	70.72	0.3422	8.87066	249.487	718.524	44.404	28.9037	1.94387	0.243	3	4	4	4	3	2	2	2	2
1	57	64	1.7	190	90	62	22.1453	81	6.215	6.23222	0.722592	3.87898	2.01707	4.21515	3.08974	0.358239	1.92308	2.08974	7.14	78.676	0.3186	8.19312	181.439	663.643	28.826	11.5615	0.453869	-0.444	1	1	1	1	1	1	0	0	0
1	52	66	1.75	126	73	80	21.551	76	5.225	5.87018	0.880659	3.82726	1.62917	4.24101	3.60317	0.540557	2.34921	2.60317	4.641	99.008	0.4012	8.21744	177.094	624.525	29.081	9.68725	0.651534	-0.268	1	1	1	1	1	1	0	0	0
1	45	70	1.67	102	80	76	25.0995	86	5.28	6.51668	3.25167	3.87898	1.13783	5.37885	5.72727	2.85777	3.40909	4.72727	4.998	86.632	0.3953	9.53416	239.303	819.938	40.95	68.285	3.59836	0.456	4	4	3	3	4	4	3	3	3
1	47	63	1.66	169	107	73	22.8625	84	6.325	4.83579	5.27267	1.96535	1.42229	3.4135	3.4	3.70716	1.38182	2.4	3.927	93.704	0.5959	10.1981	233.155	856.642	37.346	100.181	4.79128	0.569	4	4	3	3	4	4	3	3	3
1	49	71	1.65	126	91	78	26.079	79	5.115	4.73235	1.09518	2.61184	1.62917	3.10318	2.90476	0.672231	1.60317	1.90476	4.641	99.008	0.4012	8.41416	219.433	664.719	35.537	15.3325	0.761403	-0.174	2	2	3	2	1	1	0	0	0
1	53	67	1.75	130	90	74	21.8776	84	5.83	4.52547	0.67743	2.87044	1.34471	3.18076	3.36538	0.503774	2.13462	2.36538	7.497	91.936	0.3245	8.06464	176.434	677.429	31.042	12.8712	0.666016	-0.301	1	1	1	1	1	1	0	0	0
1	58	69	1.69	150	90	62	24.1588	89	4.675	5.55987	1.63712	3.33592	1.47401	4.08585	3.77193	1.11066	2.26316	2.77193	5.355	101.66	0.413	8.72624	210.816	776.635	34.376	39.291	1.47735	0.045	2	3	2	2	3	3	1	1	2
1	52	65	1.66	108	88	67	23.5883	79	5.28	5.58573	1.3097	3.49108	1.49987	4.08585	3.72414	0.873208	2.32759	2.72414	4.284	103.428	0.4425	8.62479	203.444	681.359	33.29	18.3358	1.04415	-0.06	2	2	2	2	2	2	1	1	1
1	46	64	1.71	138	96	92	21.8871	81	4.125	4.03413	2.12261	1.49987	1.55159	2.48254	2.6	1.36803	0.966667	1.6	3.213	70.72	0.4012	8.86078	193.937	717.723	31.132	33.9618	1.74362	0.137	3	3	2	1	3	2	2	2	2
1	49	73	1.7	146	107	73	25.2595	84	5.335	5.17197	3.37586	2.56012	1.06025	4.11171	4.87805	3.18401	2.41463	3.87805	4.284	89.284	0.4366	9.58201	242.037	804.889	42.176	64.1414	3.9024	0.502	4	4	4	4	4	4	3	3	3
1	42	86	1.75	140	90	93	28.0816	91	5.005	7.39591	1.82906	5.19783	1.37057	6.02534	5.39623	1.33452	3.79245	4.39623	3.213	87.516	0.472	8.90531	250.076	810.383	41.308	47.5556	1.67026	0.124	3	3	4	3	4	4	2	2	2
1	50	75	1.7	148	90	68	25.9516	84	5.28	5.99948	3.22908	3.20662	1.31885	4.68063	4.54902	2.44841	2.43137	3.54902	4.284	83.096	0.3776	9.52719	247.245	800.284	40.719	61.3526	2.95669	0.389	4	4	4	3	4	4	3	3	3
1	44	55	1.63	139	97	70	20.7008	74	5.17	4.44789	1.19679	1.81019	2.09465	2.35325	2.12346	0.571358	0.864198	1.12346	3.213	81.328	0.3835	8.51359	176.238	630.005	26.772	10.7711	0.684172	-0.244	2	1	1	1	1	1	0	0	0
1	47	70	1.7	139	96	68	24.2215	81	5.225	6.0512	1.52422	4.00828	1.34471	4.70649	4.5	1.13349	2.98077	3.5	3.927	80.444	0.3776	8.766	212.325	710.046	35.453	24.3875	1.3703	0.053	3	3	2	2	2	2	1	1	1
1	48	71	1.73	127	74	76	23.7228	81	5.115	5.35299	0.959693	3.25834	1.65503	3.69796	3.23438	0.579864	1.96875	2.23438	4.998	99.892	0.3953	8.2821	196.475	670.85	31.951	15.3551	0.708805	-0.237	1	1	2	1	1	1	0	0	0
1	54	70	1.65	120	99	100	25.7117	79	7.15	5.6633	1.26454	3.90484	1.18955	4.47375	4.76087	1.06304	3.28261	3.76087	5.355	101.66	0.4248	8.89289	228.651	702.538	39.746	17.7035	1.21349	0.025	3	3	3	3	1	2	1	1	1
0	48	54	1.63	144	80	70	20.3244	81	4.675	4.57719	1.34357	2.48254	1.47401	3.10318	3.10526	0.911506	1.68421	2.10526	3.213	58.344	0.2419	8.52863	173.34	690.819	28.479	30.9021	1.84749	-0.041	2	2	1	1	3	2	1	1	2
1	36	85	1.8	153	97	78	26.2346	86	5.115	4.68063	1.43389	2.8963	1.13783	3.5428	4.11364	1.2602	2.54545	3.11364	5.355	97.24	0.3068	8.68364	227.812	746.793	39.83	30.1118	1.54873	0.1	2	3	3	3	3	3	2	2	2
1	50	70	1.75	110	78	75	22.8571	81	5.445	5.55987	1.50164	3.5428	1.31885	4.24101	4.21569	1.13859	2.68627	3.21569	5.355	104.312	0.4897	8.79232	200.967	712.178	33.734	24.0262	1.41918	0.057	3	3	2	2	2	2	1	1	1
1	56	70	1.65	123	82	64	25.7117	81	7.37	4.16343	1.35486	2.58598	0.956814	3.20662	4.35135	1.41601	2.7027	3.35135	4.641	81.328	0.4248	8.99218	231.204	728.367	42.443	21.6778	1.65735	0.152	3	3	3	4	2	2	2	2	2
1	52	61	1.71	108	80	74	20.8611	76	5.225	3.43936	1.03873	1.75847	1.21541	2.22395	2.82979	0.854629	1.44681	1.82979	4.641	100.776	0.3245	8.38252	174.869	637.071	30.568	11.426	1.04702	-0.071	2	2	1	1	1	1	1	1	1
1	47	69	1.73	175	103	65	23.0546	81	5.775	7.00802	1.03873	5.43057	1.11197	5.89604	6.30233	0.934129	4.88372	5.30233	3.57	90.168	0.4189	8.4826	195.563	687.091	34.996	16.6196	1.15912	-0.032	2	2	2	2	1	2	1	1	1
1	40	92	1.71	172	120	84	31.4627	100	6.82	6.41324	1.69358	4.11171	1.52573	4.88751	4.20339	1.11001	2.69492	3.20339	5.712	95.472	0.4425	9.13777	287.499	913.777	46.188	59.2751	1.42848	0.045	3	3	4	4	4	4	1	1	1
1	51	56	1.63	124	88	70	21.0772	79	4.455	4.93923	1.24196	2.06879	2.30153	2.6377	2.14607	0.539623	0.898876	1.14607	3.927	98.124	0.4071	8.40178	177.086	663.741	26.327	17.3874	0.683676	-0.268	2	1	1	1	1	1	0	0	0
1	46	105	1.75	160	100	100	34.2857	97	6.05	5.6633	4.45975	2.45668	1.16369	4.49961	4.86667	3.83241	2.11111	3.86667	3.927	101.66	0.4012	9.98622	342.385	968.663	57.845	142.712	4.54017	0.583	4	4	4	4	4	4	3	3	3
1	45	68	1.63	138	90	74	25.5937	89	4.62	6.25808	2.11132	4.05999	1.24127	5.01681	5.04167	1.70094	3.27083	4.04167	3.213	99.892	0.295	8.96878	229.545	798.221	38.817	50.6718	2.19299	0.23	3	4	3	3	4	4	2	2	2
1	52	78	1.79	117	79	63	24.3438	86	5.17	5.32713	0.959693	3.49108	1.39643	3.9307	3.81481	0.687247	2.5	2.81481	6.783	97.24	0.2478	8.2928	201.878	713.181	34.228	20.1536	0.879735	-0.161	1	2	2	2	2	2	0	0	0
1	47	65	1.68	126	83	70	23.03	81	4.84	5.43057	1.15163	3.56866	1.34471	4.08585	4.03846	0.856415	2.65385	3.03846	4.998	103.428	0.4248	8.40916	193.663	681.142	32.801	18.4261	1.06328	-0.066	2	2	2	2	2	2	1	1	1
1	46	68	1.7	124	101	91	23.5294	86	5.665	4.75821	2.48391	2.37911	1.24127	3.51694	3.83333	2.0011	1.91667	2.83333	5.355	92.82	0.3658	9.33521	219.652	802.828	36.8	52.1621	2.60832	0.301	4	4	3	3	4	4	3	3	3
1	59	63	1.69	127	80	60	22.0581	81	6.325	8.11999	1.5468	6.25808	1.16369	6.9563	6.97778	1.32922	5.37778	5.97778	5.355	88.4	0.3717	8.97177	197.9	726.713	34.222	24.7488	1.68745	0.124	3	3	2	2	2	2	2	2	2
1	53	88	1.79	140	90	70	27.4648	91	5.61	7.47349	2.83392	4.75821	1.42229	6.0512	5.25455	1.9925	3.34545	4.25455	6.069	102.544	0.4189	9.45728	259.742	860.612	41.939	73.6818	2.52544	0.299	4	4	4	4	4	4	3	3	3
0	54	73	1.58	160	80	82	29.2421	89	6.27	6.59426	2.74359	3.72382	1.60331	4.99095	4.1129	1.71121	2.32258	3.1129	3.927	65.416	0.4484	9.53611	278.856	848.714	43.606	85.0514	3.11159	0.233	4	4	4	4	4	4	2	2	3
0	54	46	1.5	147	90	86	20.4444	71	5.06	5.24955	1.58067	2.97388	1.55159	3.69796	3.38333	1.01874	1.91667	2.38333	2.856	53.924	0.3009	8.77028	179.304	622.69	28.859	20.5487	1.80446	0.009	3	3	1	1	2	1	1	1	2
0	53	56	1.6	122	68	70	21.875	69	5.28	5.94776	0.756464	3.49108	2.12051	3.82726	2.80488	0.356737	1.64634	1.80488	3.927	60.112	0.2183	8.07589	176.66	557.237	27.59	8.3211	0.59277	-0.444	1	1	1	1	1	1	0	0	0
0	45	56	1.6	154	103	84	21.875	76	5.555	5.84432	0.880659	3.90484	1.52573	4.31859	3.83051	0.577205	2.55932	2.83051	3.57	73.372	0.2714	8.27868	181.096	629.18	30.236	15.8519	1.05641	-0.237	1	1	1	1	1	1	0	0	1
0	47	69	1.5	130	80	76	30.6667	86	5.39	5.06853	0.587106	3.33592	1.47401	3.59452	3.4386	0.398305	2.26316	2.4386	3.927	64.532	0.2006	7.84306	240.521	674.504	41.824	16.439	0.679919	-0.398	1	1	4	4	1	1	0	0	0
0	49	70	1.58	126	76	72	28.0404	81	5.005	5.30127	1.96455	2.97388	1.42229	3.87898	3.72727	1.38126	2.09091	2.72727	2.856	71.604	0.3068	8.97677	251.712	727.118	41.108	45.1846	2.34382	0.14	3	3	4	3	3	2	2	2	2
0	44	82	1.56	166	99	132	33.6949	94	5.995	6.36152	1.06131	4.34445	1.52573	4.83579	4.16949	0.695606	2.84746	3.16949	2.856	60.112	0.2478	8.5415	287.805	802.901	47.451	38.2071	1.22379	-0.155	2	2	4	4	3	4	0	0	1
1	53	64	1.68	114	66	80	22.6757	79	4.235	5.30127	0.733883	3.0256	1.93949	3.36178	2.73333	0.37839	1.56	1.73333	4.998	106.08	0.3835	7.82505	177.439	618.179	28.309	10.2744	0.461898	-0.42	1	1	1	1	1	1	0	0	0
0	46	85	1.6	154	99	84	33.2031	102	5.61	9.594	1.68229	6.72356	2.09465	7.49935	4.58025	0.803135	3.20988	3.58025	2.856	50.388	0.2242	8.93577	296.696	911.449	44.321	74.0205	1.54757	-0.097	3	2	4	4	4	4	1	1	2
1	36	70	1.72	120	78	70	23.6614	86	5.39	5.35299	2.04358	3.56866	0.853375	4.49961	6.27273	2.39471	4.18182	5.27273	3.213	85.748	0.2478	9.09032	215.09	781.767	40.142	42.9152	3.11215	0.378	3	4	3	3	3	3	3	3	3
0	42	55	1.56	137	83	102	22.6003	79	4.73	4.65477	1.02744	2.6377	1.55159	3.10318	3	0.662182	1.7	2	5.712	76.024	0.2655	8.27206	186.951	653.493	30.757	21.5762	1.238	-0.18	1	2	1	1	2	1	0	0	1
0	39	52	1.65	145	78	66	19.1001	71	4.785	6.15464	0.790335	3.62038	2.17223	3.98242	2.83333	0.363837	1.66667	1.83333	2.856	63.648	0.3009	8.02126	153.207	569.509	23.697	10.2744	0.666981	-0.444	1	1	1	1	1	1	0	0	0
1	40	73	1.75	132	87	78	23.8367	84	5.17	4.83579	1.11776	2.94802	1.37057	3.46522	3.5283	0.815543	2.15094	2.5283	3.927	101.66	0.3658	8.44527	201.308	709.402	33.983	21.2374	1.03119	-0.086	2	2	2	2	2	2	1	1	1
1	54	77	1.7	129	82	76	26.6436	86	7.865	5.01681	1.82906	2.61184	1.57745	3.43936	3.18033	1.15951	1.65574	2.18033	4.998	82.212	0.236	9.35729	249.312	804.727	39.561	38.4103	1.41278	0.064	4	3	4	3	3	4	2	2	1
0	53	56	1.54	124	73	79	23.6128	74	5.225	6.25808	0.564525	2.81872	3.18076	3.07732	1.96748	0.177481	0.886179	0.96748	3.213	77.792	0.3127	7.77275	183.536	575.184	26.89	9.0324	0.303489	-0.745	1	1	1	1	1	1	0	0	0
1	55	64	1.66	142	91	85	23.2254	97	5.555	6.12878	1.34357	4.16343	1.34471	4.78407	4.55769	0.999151	3.09615	3.55769	5.712	82.212	0.2596	8.7011	202.087	844.006	33.931	42.9942	1.47898	0	2	3	2	2	3	4	1	1	2
1	51	75	1.74	163	111	60	24.7721	86	5.665	4.83579	5.10331	2.24981	1.16369	3.6721	4.15556	4.38544	1.93333	3.15556	7.497	93.704	0.3953	10.0553	249.09	864.753	42.225	107.169	5.56134	0.642	4	4	4	4	4	4	3	3	3
1	56	60	1.8	137	75	73	18.5185	76	5.445	5.6633	1.05002	3.1549	2.01707	3.64624	2.80769	0.520566	1.5641	1.80769	3.213	81.328	0.413	8.43457	156.196	641.027	24.117	11.5502	0.675457	-0.284	2	1	1	1	1	1	0	0	0
1	51	69	1.62	168	105	105	26.2917	89	5.61	6.33566	1.61454	4.55133	1.03439	5.30127	6.125	1.56086	4.4	5.125	5.712	106.08	0.4307	8.89467	233.856	791.626	41.687	38.749	1.98275	0.193	3	3	3	4	3	3	2	2	2
1	48	71	1.65	118	78	64	26.079	89	5.28	5.6633	3.61296	2.97388	1.03439	4.62891	5.475	3.49283	2.875	4.475	7.854	112.268	0.354	9.63952	251.389	857.917	44.104	86.7111	4.45694	0.543	4	4	4	4	4	4	3	3	3
0	39	52	1.56	134	80	90	21.3675	71	4.675	5.63745	0.587106	3.59452	1.78433	3.85312	3.15942	0.329035	2.01449	2.15942	2.856	72.488	0.2832	7.70075	164.546	546.753	27.268	7.63238	0.569597	-0.481	1	1	1	1	1	1	0	0	0
0	52	67	1.65	130	88	70	24.6097	86	4.51	5.58573	0.846788	3.33592	1.86191	3.72382	3	0.454796	1.79167	2	4.641	73.372	0.3127	8.03106	197.642	690.671	31.514	23.7101	0.883308	-0.347	1	1	2	1	2	2	0	0	0
0	57	68	1.53	150	85	70	29.0487	81	5.39	6.36152	1.86293	4.24101	1.26713	5.09439	5.02041	1.4702	3.34694	4.02041	3.927	58.344	0.2773	8.99777	261.373	728.819	43.957	42.8475	2.44278	0.167	3	3	4	4	3	2	2	2	2
0	41	52	1.56	126	80	60	21.3675	71	4.51	5.61159	0.779045	3.33592	1.91363	3.69796	2.93243	0.407104	1.74324	1.93243	3.213	68.952	0.236	7.94768	169.822	564.285	27.065	10.1276	0.704743	-0.387	1	1	1	1	1	1	0	0	0
0	46	57	1.64	135	85	90	21.1927	79	4.565	4.83579	1.51293	2.767	1.37057	3.46522	3.5283	1.10387	2.01887	2.5283	3.213	72.488	0.3481	8.62353	182.756	681.259	30.442	31.7715	2.1354	0.041	2	3	1	1	3	2	1	1	2
0	45	54	1.58	120	60	70	21.6311	71	4.62	6.02534	0.722592	3.9307	1.75847	4.26687	3.42647	0.410921	2.23529	2.42647	7.14	71.604	0.295	7.89655	170.812	560.655	27.921	9.3937	0.706776	-0.387	1	1	1	1	1	1	0	0	0
0	45	55	1.6	107	65	70	21.4844	76	5.335	4.99095	0.609687	2.71528	1.99121	2.99974	2.50649	0.30619	1.36364	1.50649	2.856	66.3	0.2714	7.87055	169.094	598.162	27.264	10.9744	0.565753	-0.509	1	1	1	1	1	1	0	0	0
1	51	66	1.67	170	100	78	23.6652	84	6.105	4.60305	0.779045	2.84458	1.39643	3.20662	3.2963	0.557883	2.03704	2.2963	3.57	82.212	0.354	8.25049	195.25	693.041	33.665	14.8019	0.708101	-0.252	1	1	2	2	1	2	0	0	0
0	45	51	1.58	136	84	89	20.4294	69	4.62	5.50815	1.64841	2.8963	1.86191	3.64624	2.95833	0.885336	1.55556	1.95833	3.927	70.72	0.2124	8.72128	178.171	601.768	27.465	18.1326	1.52457	-0.051	2	2	1	1	2	1	1	1	2
1	52	68	1.64	110	72	68	25.2826	89	4.73	4.34445	1.05002	2.68942	1.16369	3.18076	3.73333	0.902315	2.31111	2.73333	7.854	90.168	0.2891	8.2938	209.689	738.148	37.055	25.2004	1.17114	-0.046	1	2	2	3	2	3	1	1	1
1	55	83	1.7	162	100	80	28.7197	84	6.27	7.03388	2.05487	4.73235	1.37057	5.6633	5.13208	1.49928	3.45283	4.13208	6.426	83.096	0.3658	9.24706	265.573	776.753	43.519	39.0426	1.70994	0.176	4	3	4	4	3	3	2	2	2
1	61	67	1.64	180	100	110	24.9108	81	6.16	7.55107	2.42746	5.45643	0.982674	6.5684	7.68421	2.47026	5.55263	6.68421	4.284	88.4	0.3363	9.39599	234.061	761.075	41.65	38.8393	2.9416	0.393	4	4	3	3	3	3	3	3	3
1	56	67	1.7	160	99	89	23.1834	86	4.95	5.48229	1.68229	3.77554	0.930954	4.55133	5.88889	1.80705	4.05556	4.88889	3.927	105.196	0.413	8.81061	204.26	757.712	37.492	35.328	2.37379	0.258	3	4	2	3	3	3	2	2	2
1	35	69	1.74	120	70	70	22.7903	81	4.95	4.73235	0.982274	2.40497	1.88777	2.84458	2.50685	0.520336	1.27397	1.50685	4.641	86.632	0.3481	8.27257	188.535	670.078	29.678	15.7164	0.649551	-0.284	1	1	1	1	1	1	0	0	0
1	60	70	1.64	160	100	60	26.0262	79	6.985	4.68063	1.95326	2.45668	1.31885	3.36178	3.54902	1.48103	1.86275	2.54902	3.927	102.544	0.3068	9.30433	242.156	735.042	40.098	27.3456	1.67937	0.17	4	3	4	3	2	3	2	2	2
0	35	70	1.62	126	80	80	26.6728	86	4.455	4.39617	0.993564	2.74114	1.18955	3.20662	3.69565	0.835242	2.30435	2.69565	5.355	62.764	0.2655	8.17864	218.147	703.363	38.462	27.8198	1.5495	-0.076	1	2	3	3	2	2	1	1	2
0	47	67	1.53	100	83	63	28.6215	89	16.94	8.27515	1.51293	5.9219	1.65503	6.62012	5	0.914139	3.57812	4	3.927	49.504	0.1888	9.93479	284.348	884.197	45.557	46.9008	1.68374	-0.041	4	2	4	4	4	4	1	1	2
0	41	65	1.53	116	57	80	27.7671	81	4.675	4.93923	0.67743	3.18076	1.44815	3.49108	3.41071	0.46779	2.19643	2.41071	4.284	71.604	0.3304	7.84385	217.801	635.352	37.516	15.5809	0.798385	-0.328	1	1	3	3	1	1	0	0	0
1	54	60	1.6	130	84	84	23.4375	84	7.095	5.22369	3.13876	2.27567	1.49987	3.72382	3.48276	2.09269	1.51724	2.48276	3.213	81.328	0.4425	9.79429	229.554	822.72	36.277	59.6364	2.66976	0.32	4	4	3	2	4	4	3	3	3
1	52	67	1.73	135	76	65	22.3863	81	5.005	3.62038	0.790335	1.57745	1.68089	1.93949	2.15385	0.470189	0.938462	1.15385	4.998	99.892	0.3009	8.06621	180.573	653.363	29.658	12.6454	0.592403	-0.328	1	1	1	1	1	1	0	0	0
1	51	69	1.74	139	82	70	22.7903	81	5.665	5.58573	2.04358	3.0256	1.62917	3.95656	3.42857	1.25437	1.85714	2.42857	4.998	83.096	0.4661	9.14008	208.305	740.346	32.775	32.6973	1.56587	0.097	3	3	2	2	3	3	2	2	2
1	60	65	1.64	140	80	90	24.1672	83	5.94	4.91337	0.824207	2.68942	1.83605	3.07732	2.67606	0.448903	1.46479	1.67606	4.641	103.428	0.4425	8.27944	200.091	687.194	32.129	14.8357	0.556752	-0.347	1	1	2	1	1	2	0	0	0
1	47	63	1.63	140	90	72	23.7118	81	5.115	6.93044	1.26454	4.57719	1.78433	5.14611	3.88406	0.70869	2.56522	2.88406	3.927	94.588	0.4189	8.55795	202.925	693.194	31.902	20.2326	0.866489	-0.149	2	2	2	1	2	2	1	0	0
1	43	78	1.75	133	83	70	25.4694	86	5.995	7.16318	6.61624	4.47375	0.930954	6.23222	7.69444	7.10694	4.80556	6.69444	6.069	102.544	0.2478	10.3715	264.156	891.951	47.547	138.941	8.87763	0.852	4	4	4	4	4	4	3	3	3
1	56	64	1.68	150	82	60	22.6757	74	7.205	6.59426	1.93068	4.52547	1.18955	5.40471	5.54348	1.62303	3.80435	4.54348	2.856	80.444	0.3009	9.32371	211.422	689.955	35.962	17.3761	1.85582	0.21	4	3	2	2	1	2	2	2	2
1	48	64	1.65	138	80	80	23.5078	81	6.71	6.10292	2.2581	3.31006	1.75847	4.34445	3.47059	1.28413	1.88235	2.47059	6.426	100.776	0.5133	9.40919	221.189	762.144	33.964	36.1296	1.57724	0.107	4	3	3	2	3	3	2	2	2
1	51	56	1.62	182	114	102	21.3382	79	5.115	5.24955	1.73874	3.33592	1.11197	4.13757	4.72093	1.56365	3	3.72093	4.998	91.052	0.2714	8.8764	189.407	701.236	33.072	24.3423	1.96889	0.193	3	3	1	2	2	2	2	2	2
1	46	75	1.75	127	86	68	24.4898	84	5.39	5.19783	1.1855	3.36178	1.29299	3.90484	4.02	0.916868	2.6	3.02	4.284	80.444	0.236	8.54578	209.284	717.846	35.728	22.5246	1.1427	-0.036	2	2	2	2	2	2	1	1	1
1	45	83	1.7	148	99	66	28.7197	109	5.555	6.54254	1.43389	4.42203	1.47401	5.06853	4.4386	0.972784	3	3.4386	6.426	105.196	0.4189	8.76616	251.762	955.511	41.173	63.0913	1.43967	-0.013	3	3	4	3	4	4	1	1	1
1	50	60	1.56	130	95	88	24.6548	81	5.115	5.12025	0.67743	3.07732	1.73261	3.38764	2.95522	0.390988	1.77612	1.95522	4.284	71.604	0.3717	7.9338	195.606	642.638	32.275	10.8389	0.468196	-0.409	1	1	2	2	1	1	0	0	0
1	49	75	1.71	150	84	76	25.6489	86	5.39	6.15464	3.07102	3.51694	1.24127	4.91337	4.95833	2.47409	2.83333	3.95833	4.998	103.428	0.3304	9.49762	243.604	816.796	40.739	64.4914	3.07864	0.393	4	4	4	3	4	4	3	3	3
1	46	67	1.6	126	86	82	26.1719	86	4.62	4.44789	4.05329	1.86191	0.801655	3.64624	5.54839	5.05615	2.32258	4.54839	5.712	78.676	0.3835	9.62099	251.799	827.405	47.762	85.1191	6.22205	0.704	4	4	4	4	4	4	3	3	3
1	41	90	1.67	138	80	70	32.2708	97	5.335	5.14611	1.52422	3.33592	1.11197	4.03413	4.62791	1.37073	3	3.62791	5.355	88.4	0.3422	8.78684	283.558	852.323	49.728	48.775	1.68518	0.137	3	3	4	4	4	4	2	2	2
1	52	65	1.63	128	79	86	24.4646	86	6.27	4.24101	2.31455	1.81019	1.37057	2.87044	3.09434	1.68875	1.32075	2.09434	6.783	95.472	0.4543	9.36606	229.137	805.481	37.4	48.6056	2.15602	0.228	4	4	3	3	4	4	2	2	2
1	46	58	1.69	143	89	84	20.3074	76	5.335	5.74088	0.925821	3.82726	1.49987	4.24101	3.82759	0.617267	2.55172	2.82759	4.284	90.168	0.4012	8.28828	168.314	629.91	28.113	10.184	0.766334	-0.208	1	2	1	1	1	1	0	0	0
1	50	62	1.65	129	79	60	22.7732	81	4.895	6.0512	0.598397	4.00828	1.75847	4.29273	3.44118	0.340294	2.27941	2.44118	6.069	102.544	0.3481	7.76578	176.852	629.028	29.369	9.57435	0.424965	-0.469	1	1	1	1	1	1	0	0	0
1	60	71	1.72	120	78	68	23.9995	89	5.665	4.26687	1.49035	2.56012	1.03439	3.23248	4.125	1.44079	2.475	3.125	3.927	91.936	0.4366	8.82438	211.78	785.37	37.885	35.7683	1.92325	0.158	3	3	2	3	3	3	2	2	2
1	60	55	1.65	150	90	88	20.202	74	5.005	6.51668	1.34357	3.07732	2.81872	3.69796	2.31193	0.476659	1.09174	1.31193	4.641	83.98	0.3068	8.59684	173.673	636.166	24.574	12.0921	0.577667	-0.319	2	1	1	1	1	1	0	0	0
1	60	60	1.64	122	77	78	22.3081	79	5.17	6.6977	1.43389	4.52547	1.52573	5.17197	4.38983	0.939808	2.9661	3.38983	5.355	101.66	0.4071	8.69433	193.955	686.852	31.475	20.0745	1.15693	-0.027	2	2	2	1	2	2	1	1	1
1	60	76	1.72	139	86	60	25.6896	97	5.17	5.48229	0.993564	3.2842	1.73261	3.74968	3.16418	0.57345	1.89552	2.16418	5.712	85.748	0.3599	8.32748	213.929	807.766	34.34	31.7941	0.804146	-0.244	1	1	2	2	3	4	0	0	0
1	59	55	1.68	126	84	80	19.487	76	5.335	5.94776	1.62583	3.74968	1.44815	4.49961	4.10714	1.1227	2.58929	3.10714	3.57	86.632	0.4543	8.85138	172.486	672.705	28.194	17.8842	1.42199	0.049	3	3	1	1	2	1	1	1	1
1	59	85	1.75	127	92	70	27.7551	76	6.05	4.57719	1.11776	2.87044	1.18955	3.38764	3.84783	0.939647	2.41304	2.84783	4.641	82.212	0.4071	8.60245	238.762	653.786	41.801	12.2954	0.988754	-0.027	2	2	3	4	1	1	1	1	1
1	59	65	1.65	120	85	70	23.8751	81	4.95	4.75821	1.5468	2.8963	1.16369	3.59452	4.08889	1.32922	2.48889	3.08889	5.355	94.588	0.3363	8.72664	208.35	706.858	36.127	24.7488	1.61928	0.124	2	3	2	2	2	2	2	2	2
1	58	63	1.7	108	86	70	21.7993	76	5.115	4.91337	1.34357	2.99974	1.29299	3.62038	3.8	1.03912	2.32	2.8	3.927	91.052	0.2832	8.61858	187.879	655.012	31.877	14.7793	1.2452	0.017	2	3	1	1	1	1	1	1	1
1	58	78	1.63	128	80	62	29.3575	86	4.235	7.26661	1.97584	5.06853	1.29299	5.97362	5.62	1.52811	3.92	4.62	5.355	105.196	0.5959	8.81544	258.8	758.128	43.5	41.4926	1.76177	0.185	3	3	4	4	3	3	2	2	2
1	58	78	1.68	130	84	65	27.6361	92	8.8	3.36178	1.46777	1.75847	0.930954	2.43082	3.61111	1.57662	1.88889	2.61111	4.998	76.024	0.2183	9.24956	255.621	850.96	47.121	39.6297	2.01319	0.199	4	3	4	4	3	4	2	2	2
1	57	105	1.73	127	85	77	35.083	109	5.28	5.50815	1.27583	3.49108	1.42229	4.08585	3.87273	0.897022	2.45455	2.87273	4.641	104.312	0.3717	8.59859	301.665	937.246	50.075	56.1364	1.1772	-0.046	2	2	4	4	4	4	1	1	1
1	57	64	1.7	132	98	64	22.1453	81	5.995	3.6721	4.23394	1.03439	0.930954	2.74114	3.94444	4.54796	1.11111	2.94444	2.856	89.284	0.59	9.92513	219.795	803.935	39.467	67.743	5.76201	0.658	4	4	3	3	4	4	3	3	3
1	55	72	1.68	136	74	82	25.5102	86	4.785	6.59426	1.61454	4.88751	0.956814	5.63745	6.89189	1.68741	5.10811	5.89189	4.284	99.892	0.4366	8.73561	222.847	751.262	40.685	33.9054	2.10599	0.228	3	4	3	3	3	3	2	2	2
1	55	67	1.64	140	80	74	24.9108	84	6.05	5.89604	3.72587	3.20662	0.982674	4.91337	6	3.79156	3.26316	5	4.998	83.98	0.4248	9.80643	244.286	823.74	43.21	70.7915	4.68224	0.579	4	4	4	4	4	4	3	3	3
1	56	78	1.71	109	79	78	26.6749	96	16.775	2.5084	1.59196	1.06025	0.775795	1.73261	3.23333	2.05204	1.36667	2.23333	24.99	1288.87	0.4425	9.97592	266.107	957.689	51.921	49.3508	2.78917	0.312	4	4	4	4	4	4	3	3	3
1	55	69	1.67	127	78	64	24.7409	86	5.39	5.84432	1.03873	4.13757	1.24127	4.60305	4.70833	0.836824	3.33333	3.70833	7.14	104.312	0.3776	8.41361	208.161	723.57	36.191	21.8133	1.06193	-0.076	2	2	2	2	2	2	1	1	1
1	56	72	1.64	134	86	68	26.7698	86	4.785	7.05974	3.01456	4.52547	1.16369	5.89604	6.06667	2.59052	3.88889	5.06667	4.641	104.312	0.4779	9.36001	250.565	804.961	42.821	63.3059	3.14805	0.413	4	4	4	4	4	4	3	3	3
1	56	66	1.69	168	103	100	23.1084	86	4.95	3.2842	3.98555	1.03439	0.879235	2.40497	3.73529	4.53297	1.17647	2.73529	4.641	79.56	0.3894	9.67313	223.531	831.889	41.146	83.6965	5.96472	0.656	4	4	3	3	4	4	3	3	3
1	54	72	1.65	142	82	92	26.4463	86	5.445	6.15464	1.38873	3.6721	1.83605	4.31859	3.35211	0.75637	2	2.35211	4.641	80.444	0.3068	8.71416	230.457	749.418	35.812	29.1634	0.92541	-0.119	2	2	3	2	3	3	1	1	1
1	53	68	1.69	169	100	74	23.8087	81	4.84	4.88751	2.86779	2.22395	1.34471	3.5428	3.63462	2.13264	1.65385	2.63462	3.927	103.428	0.3658	9.32152	221.933	755.043	36.54	45.8846	2.60188	0.328	4	4	3	2	4	3	3	3	3
1	51	74	1.7	133	92	70	25.6055	89	5.775	5.35299	1.0726	3.59452	1.26713	4.08585	4.22449	0.846477	2.83673	3.22449	7.497	128.18	0.4189	8.51469	218.023	757.807	37.642	25.7424	1.09107	-0.071	2	2	3	3	2	3	1	1	1
1	52	79	1.8	138	70	70	24.3827	91	5.225	3.90484	1.06131	2.17223	1.24127	2.66356	3.14583	0.855016	1.75	2.14583	4.641	95.472	0.3127	8.40402	204.913	764.766	35.576	27.594	1.15714	-0.066	2	2	2	2	2	3	1	1	1
1	50	74	1.66	143	94	60	26.8544	86	5.225	4.91337	1.85164	2.8963	1.16369	3.74968	4.22222	1.59118	2.48889	3.22222	5.355	93.704	0.4248	8.9606	240.631	770.611	41.399	38.8845	1.93022	0.201	3	3	4	3	3	3	2	2	2
1	52	88	1.83	119	72	70	26.2773	89	4.07	4.39617	1.25325	2.66356	1.16369	3.23248	3.77778	1.07696	2.28889	2.77778	5.712	97.24	0.295	8.32045	218.639	740.52	38.363	30.0779	1.36847	0.033	1	3	3	3	3	3	1	1	1
1	54	78	1.65	132	82	72	28.6501	86	6.27	3.5428	0.970983	1.70675	1.39643	2.14637	2.53704	0.695332	1.22222	1.53704	5.355	89.284	0.2832	8.4974	243.452	730.776	41.294	20.3907	0.813049	-0.155	2	2	4	3	2	2	0	0	0
1	49	85	1.68	107	87	70	30.1162	91	4.785	5.09439	1.19679	3.43936	1.11197	3.98242	4.5814	1.07628	3.09302	3.5814	5.355	78.676	0.4071	8.4362	254.066	767.694	45.124	31.1166	1.29354	0.033	2	3	4	4	3	3	1	1	1
1	51	70	1.62	116	68	61	26.6728	89	5.61	5.61159	1.27583	3.82726	1.18955	4.42203	4.71739	1.07253	3.21739	3.71739	6.426	92.82	0.3717	8.65921	230.965	770.67	40.116	30.6198	1.35156	0.029	2	3	3	3	3	3	1	1	1
1	53	67	1.67	190	110	70	24.0238	89	5.94	6.41324	2.56294	3.98242	1.26713	5.14611	5.06122	2.02263	3.14286	4.06122	6.069	70.72	0.3009	9.41393	226.159	837.84	37.609	61.5107	2.69846	0.305	4	4	3	3	4	4	3	3	3
1	52	66	1.73	126	82	86	22.0522	81	4.895	5.43057	2.89037	3.05146	1.06025	4.37031	5.12195	2.72611	2.87805	4.12195	4.641	106.08	0.3599	9.34067	205.982	756.594	36.06	46.2459	3.46129	0.436	4	4	2	2	4	3	3	3	3
1	49	70	1.7	109	69	70	24.2215	81	5.39	5.04267	0.643559	3.18076	1.57745	3.46522	3.19672	0.407974	2.01639	2.19672	3.213	93.704	0.3363	7.93487	192.194	642.725	32.601	10.2969	0.493207	-0.387	1	1	1	2	1	1	0	0	0
1	53	68	1.67	168	97	80	24.3824	86	5.72	6.49082	2.82263	4.24101	0.956814	5.53401	6.78378	2.95003	4.43243	5.78378	4.641	88.4	0.3186	9.4727	230.967	814.653	41.367	59.2751	3.77308	0.47	4	4	3	3	4	4	3	3	3
1	47	72	1.65	150	89	77	26.4463	86	8.47	4.34445	1.72745	2.35325	1.18955	3.1549	3.65217	1.45218	1.97826	2.65217	4.998	83.98	0.3776	9.37424	247.914	806.185	42.372	36.2764	1.77673	0.161	4	3	4	4	3	4	2	2	2
1	53	66	1.7	140	100	80	22.8374	81	5.28	5.04267	2.10003	2.767	1.31885	3.72382	3.82353	1.59232	2.09804	2.82353	6.426	93.704	0.3658	9.09695	207.75	736.853	34.476	33.6005	1.98561	0.201	3	3	2	2	3	3	2	2	2
1	53	76	1.71	160	90	68	25.9909	89	5.775	6.72356	1.59196	4.65477	1.34471	5.37885	5	1.18387	3.46154	4	6.783	102.544	0.5133	8.90957	231.568	792.952	38.55	38.2071	1.51347	0.072	3	3	3	3	3	3	2	2	2
1	50	89	1.8	160	90	90	27.4691	91	5.28	7.60279	2.04358	5.32713	1.34471	6.25808	5.65385	1.51972	3.96154	4.65385	6.783	105.196	0.531	9.0697	249.137	825.343	41.168	53.1331	1.92603	0.182	3	3	4	3	4	4	2	2	2
1	50	85	1.72	150	94	60	28.7317	94	4.95	5.45643	1.68229	3.4135	1.26713	4.18929	4.30612	1.32763	2.69388	3.30612	3.927	97.24	0.3422	8.81061	253.144	828.197	42.787	48.7863	1.69403	0.124	3	3	4	4	4	4	2	2	2
1	52	61	1.75	114	65	78	19.9184	76	4.675	3.10318	0.643559	1.70675	1.11197	1.99121	2.7907	0.578754	1.53488	1.7907	3.57	95.472	0.3127	7.79256	155.215	592.234	28.732	7.07915	0.725334	-0.237	1	1	1	1	1	1	0	0	0
1	52	70	1.72	100	70	90	23.6614	86	5.17	5.50815	1.63712	3.64624	1.11197	4.39617	4.95349	1.47227	3.27907	3.95349	4.284	100.776	0.3599	8.82688	208.857	759.112	36.536	34.3796	1.91336	0.167	3	3	2	2	3	3	2	2	2
1	49	94	1.8	130	85	72	29.0123	102	6.105	6.62012	3.46618	3.98242	1.06025	5.55987	6.2439	3.2692	3.7561	5.2439	8.211	99.892	0.5841	9.74323	282.674	993.81	48.988	128.249	4.5011	0.515	4	4	4	4	4	4	3	3	3
1	53	65	1.67	126	74	63	23.3067	79	4.73	5.99948	1.80648	3.4135	1.75847	4.24101	3.41176	1.0273	1.94118	2.41176	3.57	85.748	0.354	8.83637	205.947	698.074	32.07	25.2907	1.23621	0.013	3	3	2	1	2	2	1	1	1
1	48	72	1.75	164	104	90	23.5102	86	10.175	5.61159	0.846788	2.99974	2.22395	3.38764	2.52326	0.380759	1.34884	1.52326	6.069	70.72	0.3481	8.8447	207.941	760.644	32.186	17.7825	0.496511	-0.42	3	1	2	2	2	3	0	0	0
1	50	91	1.75	126	100	86	29.7143	97	5.06	5.06853	1.05002	3.25834	1.31885	3.74968	3.84314	0.79616	2.47059	2.84314	3.57	86.632	0.2537	8.36124	248.448	811.04	42.497	33.6005	1.02803	-0.097	2	2	4	4	3	4	1	1	1
1	47	85	1.8	116	74	89	26.2346	79	10.175	6.77528	6.37914	4.18929	0.879235	5.89604	7.70588	7.25533	4.76471	6.70588	4.284	70.72	0.3422	10.864	285.013	858.259	50.882	89.3079	8.19074	0.861	4	4	4	4	4	4	3	3	3
1	51	77	1.62	129	84	64	29.34	86	6.545	5.04267	1.46777	2.92216	1.44815	3.59452	3.48214	1.01354	2.01786	2.48214	4.641	88.4	0.5074	8.95351	262.696	770.002	43.063	30.8231	1.16893	0.004	3	3	4	4	3	3	1	1	1
1	46	70	1.76	140	89	77	22.5981	84	6.93	4.55133	1.82906	2.53426	1.18955	3.36178	3.82609	1.5376	2.13043	2.82609	4.284	93.704	0.3245	9.23073	208.597	775.381	35.57	34.7522	1.99928	0.188	4	3	2	2	3	3	2	2	2
1	52	85	1.65	140	80	90	31.2213	86	7.205	4.55133	1.19679	2.66356	1.34471	3.20662	3.38462	0.89	1.98077	2.38462	2.856	70.72	0.2655	8.84549	276.168	760.712	46.682	25.1327	0.98954	-0.051	3	2	4	4	2	3	1	1	1
1	47	75	1.72	150	89	88	25.3515	81	5.005	5.45643	1.75003	3.59452	1.06025	4.39617	5.14634	1.65058	3.39024	4.14634	4.641	84.864	0.4012	8.86114	224.643	717.752	39.73	28.0005	1.94687	0.217	3	4	3	3	2	2	2	2	2
1	48	66	1.74	159	103	68	21.7994	81	5.06	5.22369	0.700011	3.38764	1.52573	3.69796	3.42373	0.458804	2.22034	2.42373	3.927	87.516	0.3186	7.95578	173.431	644.418	29.434	11.2002	0.585966	-0.337	1	1	1	1	1	1	0	0	0
1	45	72	1.71	119	95	68	24.623	81	5.72	5.30127	1.70487	2.45668	2.06879	3.23248	2.5625	0.82409	1.1875	1.5625	5.355	95.472	0.4071	8.96852	220.832	726.45	33.055	27.2779	0.987508	-0.086	3	2	3	2	2	2	1	1	1
1	48	76	1.7	160	100	62	26.2976	91	6.545	6.25808	3.83877	2.767	1.73261	4.52547	3.61194	2.2156	1.59701	2.61194	5.712	80.444	0.3127	9.91492	260.738	902.258	39.779	99.8081	2.87736	0.346	4	4	4	3	4	4	3	3	3
1	48	68	1.68	128	78	66	24.093	81	4.73	5.17197	1.56938	3.33592	1.11197	4.05999	4.65116	1.41135	3	3.65116	7.854	106.964	0.3186	8.69567	209.505	704.35	36.763	25.1101	1.71105	0.149	2	3	2	3	2	2	2	2	2
1	46	68	1.67	130	90	58	24.3824	81	4.785	6.1805	0.914531	4.29273	1.47401	4.70649	4.19298	0.620437	2.91228	3.19298	6.069	98.124	0.4248	8.16721	199.136	661.544	33.414	14.6325	0.747403	-0.208	1	2	2	2	1	1	0	0	0
1	48	78	1.69	146	124	82	27.31	99	4.95	4.42203	1.23067	2.79286	1.06025	3.36178	4.17073	1.16073	2.63415	3.17073	5.355	89.284	0.295	8.49801	232.08	841.303	41.671	41.8426	1.60564	0.064	2	3	3	4	3	4	2	2	2
1	45	56	1.69	148	80	100	19.6072	74	5.72	4.70649	0.970983	1.44815	2.81872	1.88777	1.66972	0.344476	0.513761	0.669725	3.213	80.444	0.3481	8.40559	164.81	622.014	23.758	8.73885	0.423573	-0.469	2	1	1	1	1	1	0	0	0
1	48	82	1.71	122	77	76	28.0428	87	9.295	2.87044	1.23067	1.60331	0.801655	2.06879	3.58065	1.53516	2	2.58065	3.927	87.516	0.2301	9.1281	255.978	794.145	49.83	27.0746	1.83836	0.188	3	3	4	4	2	3	2	2	2
1	38	64	1.73	130	70	94	21.3839	84	5.06	4.18929	0.609687	2.58598	1.31885	2.87044	3.17647	0.462286	1.96078	2.17647	5.712	89.284	0.3776	7.81763	167.172	656.681	29.756	11.5841	0.618268	-0.337	1	1	1	1	1	1	0	0	0
1	38	78	1.78	140	80	78	24.6181	86	5.61	6.20636	10.8615	3.2842	0.956814	5.24955	6.48649	11.3517	3.43243	5.48649	4.998	91.936	0.5074	10.8008	265.896	928.872	48.146	228.091	14.444	1.055	4	4	4	4	4	4	3	3	3
1	36	54	1.76	113	82	74	17.4329	76	4.51	4.39617	2.34842	1.99121	1.31885	3.07732	3.33333	1.78066	1.5098	2.33333	3.213	101.66	0.413	9.05111	157.787	687.884	26.239	25.8327	2.37557	0.25	3	4	1	1	2	2	2	2	2
1	37	58	1.72	122	84	78	19.6052	81	5.335	6.6977	1.14034	4.80993	1.37057	5.32713	4.88679	0.832019	3.50943	3.88679	3.213	86.632	0.4366	8.49668	166.579	688.231	28.089	18.2455	1.11989	-0.081	2	2	1	1	2	2	1	1	1
1	52	71	1.71	143	97	86	24.281	84	5.72	5.7926	1.37744	3.77554	1.39643	4.39617	4.14815	0.986401	2.7037	3.14815	4.641	103.428	0.3776	8.75526	212.586	735.442	35.298	26.1714	1.23502	-0.004	3	3	2	2	2	3	1	1	1
1	49	88	1.75	150	90	66	28.7347	86	5.665	5.24955	0.779045	3.5428	1.34471	3.90484	3.90385	0.57934	2.63462	2.90385	5.712	103.428	0.4661	8.17569	234.926	703.109	40.84	16.3599	0.676271	-0.237	1	1	3	3	1	2	0	0	0
1	59	74	1.62	156	91	62	28.1969	86	5.39	5.04267	1.1855	3.0256	1.47401	3.56866	3.42105	0.80427	2.05263	2.42105	5.712	114.92	0.4366	8.54578	240.965	734.937	39.807	24.8956	0.949075	-0.097	2	2	4	3	2	3	1	1	1
1	52	68	1.7	157	90	73	23.5294	79	7.92	4.55133	1.23067	2.56012	1.42229	3.12904	3.2	0.865269	1.8	2.2	4.998	70.72	0.3717	8.96801	211.012	708.473	35.091	17.2293	1.03603	-0.06	3	2	2	2	1	2	1	1	1
1	50	57	1.67	138	86	69	20.4382	74	6.765	4.91337	0.982274	2.79286	1.68089	3.23248	2.92308	0.584377	1.66154	1.92308	7.14	88.4	0.2773	8.58495	175.461	635.286	28.44	8.84047	0.704186	-0.237	2	1	1	1	1	1	0	0	0
1	49	63	1.65	165	100	77	23.1405	79	5.72	5.89604	2.32584	3.82726	1.00853	4.88751	5.84615	2.30616	3.79487	4.84615	5.355	92.82	0.3658	9.27912	214.723	733.05	38.061	32.5618	2.78555	0.364	4	4	2	3	3	2	3	3	3
1	51	67	1.77	168	93	75	21.3859	84	4.4	6.72356	3.70329	3.46522	1.55159	5.17197	4.33333	2.38677	2.23333	3.33333	5.355	93.704	0.3776	9.48189	202.779	796.479	32.34	70.3624	3.19194	0.378	4	4	2	2	4	4	3	3	3
1	47	72	1.65	136	86	68	26.4463	84	4.29	4.73235	2.26939	2.22395	1.47401	3.25834	3.21053	1.5396	1.50877	2.21053	4.641	90.168	0.3481	8.96687	237.14	753.217	38.453	43.1184	1.83988	0.188	3	3	3	3	3	3	2	2	2
1	49	82	1.73	125	64	69	27.3982	89	4.84	5.19783	1.19679	3.20662	1.44815	3.74968	3.58929	0.826429	2.21429	2.58929	7.14	102.544	0.3304	8.44763	231.45	751.839	38.404	28.723	1.02586	-0.081	2	2	3	3	3	3	1	1	1
1	43	71	1.68	125	74	65	25.1559	81	4.51	5.50815	2.021	3.38764	1.18955	4.31859	4.63043	1.69896	2.84783	3.63043	4.284	105.196	0.3422	8.90096	223.912	720.978	38.363	32.336	2.01241	0.23	3	4	3	3	3	2	2	2	2
1	41	62	1.65	134	90	60	22.7732	81	4.565	6.4391	1.37744	3.98242	1.83605	4.60305	3.50704	0.750221	2.16901	2.50704	5.355	99.892	0.3186	8.52971	194.249	690.907	30.25	22.0391	0.936888	-0.125	2	2	2	1	2	2	1	1	1
1	40	73	1.65	147	99	60	26.8136	81	5.775	5.55987	2.46133	2.99974	1.42229	4.13757	3.90909	1.73054	2.10909	2.90909	5.355	88.4	0.3127	9.34531	250.581	756.97	40.537	39.3813	1.97891	0.238	4	4	4	3	3	3	2	2	2
1	37	71	1.61	145	85	106	27.3909	81	5.28	5.12025	1.5468	3.0256	1.39643	3.72382	3.66667	1.10768	2.16667	2.66667	7.14	106.08	0.4779	8.79118	240.799	712.086	39.798	24.7488	1.25158	0.045	3	3	4	3	2	2	1	1	1
1	40	69	1.79	123	79	71	21.5349	81	4.84	6.0512	0.654849	3.72382	2.01707	4.03413	3	0.324654	1.84615	2	6.069	95.472	0.295	7.84463	168.933	635.415	26.959	10.4776	0.417207	-0.495	1	1	1	1	1	1	0	0	0
1	39	66	1.62	135	116	75	25.1486	84	4.29	5.63745	1.34357	3.56866	1.44815	4.18929	3.89286	0.927783	2.46429	2.89286	6.069	105.196	0.3009	8.44269	212.322	709.186	35.093	25.5278	1.13984	-0.032	2	2	2	2	2	2	1	1	1
1	59	74	1.81	119	73	76	22.5878	86	5.61	4.78407	0.587106	2.71528	1.81019	2.97388	2.64286	0.324334	1.5	1.64286	8.568	137.02	0.3658	7.88307	178.061	677.944	29.485	12.3292	0.431861	-0.495	1	1	1	1	1	1	0	0	0
1	48	68	1.65	132	85	72	24.977	81	4.4	6.80114	3.61296	4.08585	1.06025	5.74088	6.41463	3.40764	3.85366	5.41463	5.355	104.312	0.4012	9.4572	236.213	766.033	41.529	57.8074	4.05201	0.533	4	4	3	3	4	3	3	3	3
1	60	68	1.65	120	95	67	24.977	84	4.785	5.30127	1.75003	3.0256	1.47401	3.82726	3.59649	1.18726	2.05263	2.59649	8.211	99.892	0.3068	8.81619	220.202	740.56	35.811	33.2505	1.46405	0.076	3	3	3	2	3	3	2	2	1
1	59	65	1.69	134	89	89	22.7583	81	4.785	4.73235	1.35486	2.43082	1.68089	3.05146	2.81538	0.806038	1.44615	1.81538	4.998	75.14	0.3304	8.56025	194.817	693.38	30.989	21.6778	1.00694	-0.092	2	2	2	1	2	2	1	1	1
1	57	83	1.75	136	94	72	27.102	94	5.28	5.99948	1.03873	4.00828	1.52573	4.47375	3.9322	0.680806	2.62712	2.9322	4.998	100.776	0.413	8.39299	227.467	788.941	37.544	30.1231	0.898058	-0.167	2	2	3	3	3	3	0	0	0
1	55	72	1.75	153	75	66	23.5102	84	4.95	4.55133	1.52422	2.30153	1.55159	2.99974	2.93333	0.982359	1.48333	1.93333	4.284	90.168	0.472	8.71194	204.819	731.803	33.032	28.9601	1.25121	-0.009	2	3	2	2	3	2	1	1	1
1	53	66	1.61	132	77	68	25.462	86	4.345	3.8014	1.05002	1.78433	1.52573	2.27567	2.49153	0.688206	1.16949	1.49153	4.641	84.864	0.2714	8.2089	209.015	705.965	34.501	22.0504	0.859809	-0.161	1	2	2	2	2	2	0	0	0
1	52	70	1.7	158	100	78	24.2215	86	6.05	7.44763	6.85334	4.08585	1.55159	5.89604	4.8	4.41698	2.63333	3.8	6.783	93.704	0.4012	10.4159	252.287	895.764	39.739	143.92	5.66937	0.645	4	4	4	3	4	4	3	3	3
1	53	75	1.68	139	84	63	26.5731	81	6.05	4.26687	2.9694	1.52573	1.37057	2.8963	3.11321	2.16654	1.11321	2.11321	5.712	106.08	0.3894	9.57949	254.557	775.938	41.358	47.5104	2.48999	0.336	4	4	4	3	4	3	3	3	3
1	51	68	1.69	142	92	90	23.8087	91	6.6	4.00828	1.20808	1.86191	1.60331	2.40497	2.5	0.753494	1.16129	1.5	5.355	70.72	0.2537	8.76717	208.735	797.813	33.746	31.4102	1.03277	-0.125	3	2	2	2	3	4	1	1	1
1	52	86	1.65	186	111	88	31.5886	91	5.225	5.37885	1.08389	3.36178	1.52573	3.85312	3.52542	0.710406	2.20339	2.52542	4.284	96.356	0.4307	8.42508	266.137	766.682	43.819	28.1811	0.829956	-0.149	2	2	4	4	2	3	1	1	0
1	51	79	1.8	151	87	67	24.3827	89	4.785	3.95656	1.19679	1.91363	1.49987	2.45668	2.63793	0.797931	1.27586	1.63793	5.355	84.864	0.3894	8.4362	205.697	750.822	33.833	28.723	1.05615	-0.097	2	2	2	2	3	3	1	1	1
1	49	76	1.65	155	90	81	27.9155	81	4.84	5.17197	6.90979	2.56012	0.775795	4.39617	6.66667	8.90672	3.3	5.66667	4.641	86.632	0.3894	10.2009	284.764	826.275	54.749	110.557	9.95609	0.95	4	4	4	4	4	4	3	3	3
1	50	67	1.7	167	103	87	23.1834	76	5.72	5.84432	1.25325	3.77554	1.49987	4.34445	3.89655	0.835569	2.51724	2.89655	4.998	106.08	0.3186	8.66077	200.786	658.219	32.912	13.7857	0.969994	-0.076	2	2	2	2	1	1	1	1	1
1	51	84	1.67	153	103	57	30.1194	86	5.225	6.10292	1.64841	3.43936	1.91363	4.18929	3.18919	0.861408	1.7973	2.18919	7.14	104.312	0.4897	8.84434	266.386	760.613	40.708	34.6167	0.978351	-0.066	3	2	4	3	3	3	1	1	1
1	50	72	1.65	152	107	82	26.4463	89	4.51	4.26687	1.09518	2.66356	1.11197	3.1549	3.83721	0.984897	2.39535	2.83721	2.856	76.024	0.3481	8.28828	219.194	737.657	39.132	26.2843	1.24705	-0.009	1	3	3	3	2	3	1	1	1
1	48	79	1.73	136	87	85	26.3958	86	4.95	4.08585	1.61454	2.35325	0.982674	3.10318	4.15789	1.64301	2.39474	3.15789	5.712	106.08	0.472	8.76951	231.478	754.178	41.932	33.9054	2.01234	0.215	3	4	3	4	3	3	2	2	2
1	48	80	1.65	116	78	87	29.3848	86	3.905	5.7926	2.60811	2.99974	1.60331	4.18929	3.6129	1.6267	1.87097	2.6129	4.284	91.052	0.3894	9.01195	264.814	775.028	42.154	54.7702	1.87442	0.212	3	3	4	4	4	3	2	2	2
1	48	58	1.72	140	83	81	19.6052	86	6.215	2.74114	1.44518	1.13783	0.930954	1.81019	2.94444	1.55237	1.22222	1.94444	4.998	86.632	0.3599	8.88627	174.217	764.219	32.118	30.3489	2.21846	0.19	3	3	1	1	3	3	2	2	2
1	47	77	1.65	127	73	70	28.2828	84	5.39	6.62012	1.86293	4.34445	1.42229	5.19783	4.65455	1.30981	3.05455	3.65455	5.355	83.98	0.4602	8.99777	254.482	755.812	41.558	35.3957	1.50707	0.117	3	3	4	3	3	3	2	2	2
1	47	65	1.66	134	75	85	23.5883	76	4.565	4.47375	1.61454	2.09465	1.62917	2.84458	2.74603	0.991021	1.28571	1.74603	4.284	85.748	0.3776	8.68854	204.948	660.329	32.644	17.76	1.14003	-0.004	2	3	2	2	1	1	1	1	1
1	46	59	1.68	129	80	86	20.9042	76	3.96	6.15464	3.52264	3.33592	1.21541	4.93923	5.06383	2.89831	2.74468	4.06383	4.641	106.08	0.3894	9.32652	194.963	708.816	33.235	38.749	3.54712	0.462	4	4	2	2	3	2	3	3	3
1	44	75	1.8	128	84	100	23.1481	81	6.545	4.08585	2.4952	1.83605	1.11197	2.97388	3.67442	2.24394	1.65116	2.67442	4.641	104.312	0.413	9.48414	219.54	768.215	37.724	39.9232	2.77853	0.35	4	4	3	3	3	3	3	3	3
1	46	69	1.63	117	94	77	25.9701	81	4.785	4.18929	1.81777	2.12051	1.24127	2.94802	3.375	1.46444	1.70833	2.375	5.355	88.4	0.3658	8.85417	229.944	717.187	39.004	29.0843	1.70463	0.164	3	3	3	3	3	2	2	2	2
1	48	80	1.66	140	80	81	29.0318	86	9.295	4.52547	3.28554	2.04293	0.982674	3.5428	4.60526	3.34347	2.07895	3.60526	3.57	70.72	0.3304	10.1101	293.514	869.466	51.428	68.9963	3.87974	0.524	4	4	4	4	4	4	3	3	3
1	46	70	1.7	122	98	72	24.2215	86	5.61	5.71502	2.19036	3.64624	1.06025	4.65477	5.39024	2.06588	3.43902	4.39024	5.712	94.588	0.2596	9.19968	222.83	791.173	39.012	45.9975	2.65164	0.316	4	4	3	3	4	3	3	3	3
1	40	64	1.68	132	89	86	22.6757	81	4.4	7.31833	1.11776	5.43057	1.37057	5.94776	5.33962	0.815543	3.96226	4.33962	4.998	89.284	0.2419	8.284	187.846	671.004	31.743	17.8842	1.02073	-0.086	1	2	1	1	2	1	1	1	1
1	37	70	1.7	139	85	70	24.2215	86	4.895	4.42203	1.1855	2.12051	1.75847	2.66356	2.51471	0.674168	1.20588	1.51471	6.426	106.08	0.3127	8.44945	204.658	726.653	32.405	24.8956	0.865322	-0.174	2	2	2	2	2	2	0	0	0
1	53	64	1.67	141	85	74	22.9481	81	4.895	3.51694	1.67099	1.62917	1.11197	2.40497	3.16279	1.50273	1.46512	2.16279	3.927	83.98	0.3658	8.7927	201.776	712.209	35.31	26.7359	1.86918	0.176	3	3	2	2	2	2	2	2	2
1	58	96	1.75	154	90	60	31.3469	102	6.215	3.6721	0.914531	1.93949	1.31885	2.35325	2.78431	0.69343	1.47059	1.78431	5.712	93.704	0.4248	8.42869	264.214	859.726	45.662	33.8376	0.912233	-0.161	2	2	4	4	3	4	0	0	0
1	56	68	1.65	125	66	60	24.977	86	5.28	6.46496	1.43389	4.37031	1.44815	5.01681	4.46429	0.990155	3.01786	3.46429	3.927	76.908	0.3599	8.71539	217.685	749.523	35.777	30.1118	1.25007	-0.004	2	3	3	2	3	3	1	1	1
1	54	107	1.81	203	119	74	32.6608	122	6.545	4.62891	1.63712	2.87044	1.00853	3.62038	4.58974	1.62327	2.84615	3.58974	4.284	75.14	0.3776	9.06271	295.995	1105.65	53.026	93.316	2.49178	0.21	3	3	4	4	4	4	2	2	3
1	60	58	1.68	144	80	82	20.5499	76	7.37	3.5428	1.41131	1.37057	1.52573	2.01707	2.32203	0.925008	0.898305	1.32203	3.57	71.604	0.3363	9.03301	185.627	686.508	30.107	15.5244	1.14171	-0.032	3	2	1	1	1	2	1	1	1
1	47	73	1.67	140	90	95	26.1752	81	5.005	5.61159	0.925821	3.87898	1.31885	4.29273	4.2549	0.70199	2.94118	3.2549	4.641	94.588	0.3481	8.22443	215.276	666.179	37.127	14.8131	0.81358	-0.155	1	2	3	3	1	1	0	0	0
1	55	69	1.75	137	83	45	22.5306	86	5.115	5.84432	0.67743	3.72382	1.81019	4.03413	3.22857	0.374232	2.05714	2.22857	4.641	80.444	0.2832	7.9338	178.753	682.307	29.195	14.226	0.498954	-0.432	1	1	1	1	1	2	0	0	0
1	44	70	1.64	124	92	80	26.0262	86	5.555	5.71502	1.70487	3.74968	1.18955	4.52547	4.80435	1.4332	3.15217	3.80435	5.712	90.168	0.3953	8.93925	232.655	768.776	39.885	35.8022	1.76913	0.155	3	3	3	3	3	3	2	2	2
1	55	77	1.72	112	90	72	26.0276	91	5.72	5.89604	0.937112	4.08585	1.37057	4.52547	4.30189	0.683738	2.98113	3.30189	3.927	75.14	0.3953	8.37008	217.853	761.678	37.195	24.3649	0.893045	-0.167	2	2	3	3	2	3	0	0	0
1	50	74	1.72	110	70	82	25.0135	84	5.335	6.46496	1.58067	4.47375	1.26713	5.19783	5.10204	1.24744	3.53061	4.10204	6.426	104.312	0.3953	8.82321	220.699	741.149	37.344	30.0327	1.53705	0.097	3	3	3	3	3	3	2	2	2
1	53	74	1.75	140	90	82	24.1633	86	5.445	5.61159	1.69358	3.62038	1.21541	4.39617	4.61702	1.39342	2.97872	3.61702	3.57	83.096	0.4071	8.91261	215.358	766.484	36.723	35.5651	1.79081	0.143	3	3	3	3	3	3	2	2	2
1	54	64	1.64	134	84	94	23.7954	81	4.73	4.11171	0.790335	2.22395	1.52573	2.58598	2.69492	0.518005	1.45763	1.69492	6.069	98.124	0.4956	8.0097	190.594	648.785	32.038	12.6454	0.632167	-0.284	1	1	1	1	1	1	0	0	0
1	54	60	1.76	145	94	80	19.3698	81	4.785	4.73235	0.722592	2.767	1.62917	3.10318	2.90476	0.443534	1.69841	1.90476	3.927	98.124	0.3894	7.93164	153.635	642.463	25.584	11.5615	0.600466	-0.357	1	1	1	1	1	1	0	0	0
1	53	71	1.75	140	85	76	23.1837	84	5.06	5.6633	0.914531	3.72382	1.52573	4.13757	3.71186	0.599405	2.44068	2.71186	5.712	85.748	0.3068	8.22309	190.641	690.74	31.72	17.3761	0.769077	-0.222	1	2	1	1	1	2	0	0	0
1	52	62	1.7	126	90	82	21.4533	84	6.325	5.32713	1.6597	2.74114	1.83605	3.49108	2.90141	0.903954	1.49296	1.90141	2.856	82.212	0.3481	9.04222	193.985	759.546	29.851	31.5344	1.20699	-0.046	3	2	2	1	3	3	1	1	1
1	51	63	1.72	117	67	66	21.2953	69	5.39	4.93923	1.24196	2.84458	1.52573	3.4135	3.23729	0.814007	1.86441	2.23729	4.284	89.284	0.3658	8.5923	182.976	592.869	29.899	4.96782	0.896129	-0.092	2	2	1	1	1	1	1	1	0
1	49	73	1.74	125	93	94	24.1115	84	4.785	4.83579	1.53551	2.8963	1.24127	3.59452	3.89583	1.23704	2.33333	2.89583	5.355	88.4	0.3422	8.68542	209.418	729.575	35.728	29.1747	1.55464	0.093	2	3	2	2	3	2	2	2	2
1	51	76	1.8	124	100	60	23.4568	84	4.62	5.6633	2.84521	3.51694	0.853375	4.80993	6.63636	3.33407	4.12121	5.63636	4.641	94.588	0.3953	9.2671	217.376	778.436	40.527	54.0589	4.25161	0.522	4	4	3	3	4	3	3	3	3
1	51	62	1.62	142	95	100	23.6244	84	4.84	5.14611	0.779045	3.10318	1.68089	3.46522	3.06154	0.463472	1.84615	2.06154	4.284	85.748	0.236	8.0183	189.428	673.537	31.128	14.8019	0.588805	-0.337	1	1	1	1	1	1	0	0	0
1	53	62	1.6	126	77	76	24.2187	79	4.84	7.29247	1.08389	5.37885	1.42229	5.87018	5.12727	0.762072	3.78182	4.12727	4.284	99.008	0.4779	8.34854	202.191	659.534	33.881	15.1744	0.898587	-0.119	1	2	2	2	1	1	1	1	0
1	52	73	1.73	138	97	74	24.3911	86	5.94	6.98216	1.12905	4.99095	1.47401	5.50815	4.73684	0.765972	3.38596	3.73684	4.998	81.328	0.4071	8.59415	209.621	739.097	34.722	23.7101	0.979491	-0.114	2	2	2	2	2	3	1	1	1
1	49	77	1.78	115	90	80	24.3025	81	5.225	4.86165	1.15163	2.87044	1.47401	3.38764	3.29825	0.781291	1.94737	2.29825	3.927	88.4	0.3717	8.4857	206.224	687.342	34.119	18.4261	0.94283	-0.108	2	2	2	2	2	2	1	1	1
1	49	54	1.64	110	82	95	20.0773	71	5.335	4.73235	0.846788	2.40497	1.93949	2.79286	2.44	0.436604	1.24	1.44	3.927	72.488	0.2891	8.19905	164.615	582.133	26.02	5.08073	0.50921	-0.357	1	1	1	1	1	1	0	0	0
1	46	66	1.62	112	74	56	25.1486	81	4.455	6.59426	0.89195	4.70649	1.47401	5.12025	4.47368	0.605118	3.19298	3.47368	4.998	91.936	0.2891	8.07075	202.968	653.731	34.118	14.2712	0.716873	-0.215	1	2	2	2	1	1	0	0	0
1	50	78	1.78	137	87	88	24.6181	86	5.5	5.35299	1.33228	3.59452	1.13783	4.21515	4.70455	1.17089	3.15909	3.70455	2.856	98.124	0.354	8.68271	213.752	746.713	37.488	27.9779	1.48985	0.068	2	3	2	3	2	3	2	2	2
1	54	57	1.65	120	86	74	20.9366	79	4.675	6.38738	1.14034	4.57719	1.29299	5.09439	4.94	0.88194	3.54	3.94	4.284	82.212	0.3127	8.36462	175.127	660.805	29.987	15.9648	1.12111	-0.056	2	2	1	1	1	1	1	1	1
1	53	69	1.7	138	79	74	23.8754	84	5.94	4.78407	2.66456	2.12051	1.44815	3.33592	3.30357	1.83997	1.46429	2.30357	6.069	99.892	0.4956	9.45282	225.69	794.037	36.269	50.6266	2.3245	0.265	4	4	3	2	4	3	2	2	2
1	53	90	1.76	157	104	78	29.0548	91	7.205	3.18076	0.722592	1.73261	1.11197	2.06879	2.86047	0.649829	1.55814	1.86047	4.284	90.168	0.2537	8.34093	242.344	759.025	44.696	18.7874	0.797534	-0.187	1	2	4	4	2	3	0	0	0
1	49	55	1.65	100	80	60	20.202	81	4.51	3.69796	0.801626	1.57745	1.75847	1.93949	2.10294	0.455866	0.897059	1.10294	7.14	99.892	0.3599	7.97625	161.136	646.076	26.137	12.826	0.604728	-0.337	1	1	1	1	1	1	0	0	0
1	45	81	1.7	147	99	100	28.0277	94	6.105	6.3098	1.60325	3.90484	1.68089	4.62891	3.75385	0.953811	2.32308	2.75385	3.927	83.98	0.4779	8.97221	251.47	843.388	39.598	46.4943	1.23448	-0.022	3	2	4	3	4	4	1	1	1
1	46	50	1.66	110	87	94	18.1449	69	4.125	4.78407	1.17421	2.53426	1.70675	3.07732	2.80303	0.687982	1.48485	1.80303	3.927	94.588	0.413	8.26873	150.035	570.542	23.975	4.69685	0.81818	-0.161	1	2	1	1	1	1	0	0	0
1	40	66	1.64	136	75	74	24.539	84	4.73	4.44789	2.64198	2.06879	1.16369	3.2842	3.82222	2.27034	1.77778	2.82222	4.998	92.82	0.4779	9.21652	226.164	774.188	38.721	50.1976	2.82651	0.356	4	4	3	3	4	3	3	3	3
1	41	78	1.69	139	95	65	27.31	86	4.4	5.58573	1.67099	3.10318	1.70675	3.87898	3.27273	0.979051	1.81818	2.27273	4.998	83.096	0.4248	8.68609	237.217	747.004	37.351	35.0909	1.17649	-0.009	2	3	3	3	3	3	1	1	1
1	36	74	1.75	124	79	64	24.1633	81	4.785	6.98216	2.75488	4.47375	1.24127	5.74088	5.625	2.2194	3.60417	4.625	5.355	91.936	0.4661	9.26993	223.992	750.864	37.667	44.0781	2.68652	0.346	4	4	3	3	3	3	3	3	3
1	41	67	1.72	128	80	75	22.6474	79	5.28	6.07706	0.779045	3.98242	1.73261	4.34445	3.50746	0.449637	2.29851	2.50746	6.069	86.632	0.3422	8.10531	183.564	640.319	29.975	10.9066	0.549224	-0.347	1	1	1	1	1	1	0	0	0
1	35	74	1.64	117	76	69	27.5134	89	5.225	5.12025	2.1452	3.1549	0.982674	4.13757	5.21053	2.18302	3.21053	4.21053	5.712	91.052	0.4071	9.10775	250.585	810.59	44.924	51.4847	2.7034	0.338	3	4	4	4	4	4	3	3	3
1	55	75	1.71	156	98	72	25.6489	84	6.27	7.11146	1.64841	5.32713	1.03439	6.07706	6.875	1.5936	5.15	5.875	6.069	98.124	0.4661	9.02666	231.524	758.239	41.193	31.3199	1.93689	0.201	3	3	3	3	3	3	2	2	2
1	56	64	1.62	125	80	66	24.3865	76	3.85	4.93923	1.63712	3.20662	0.982674	3.95656	5.02632	1.66599	3.26316	4.02632	4.641	87.516	0.2832	8.53208	208.068	648.438	37.9	18.0084	1.88286	0.223	2	4	2	3	2	1	2	2	2
1	52	83	1.67	142	91	72	29.7608	89	5.72	7.26661	1.58067	5.06853	1.47401	5.7926	4.92982	1.07236	3.4386	3.92982	4.641	106.08	0.3186	8.89289	264.66	791.467	43.135	37.9361	1.26931	0.029	3	3	4	4	3	3	1	1	1
1	53	52	1.62	130	89	68	19.8141	76	4.675	5.32713	0.90324	2.97388	1.93949	3.38764	2.74667	0.465711	1.53333	1.74667	4.284	70.72	0.3599	8.13153	161.119	617.996	25.334	9.93564	0.585148	-0.328	1	1	1	1	1	1	0	0	0
1	59	78	1.73	140	90	62	26.0617	91	4.675	6.98216	2.84521	4.57719	1.11197	5.87018	6.27907	2.5587	4.11628	5.27907	3.927	106.08	0.4307	9.27893	241.825	844.383	41.884	73.9754	3.33956	0.408	4	4	4	4	4	4	3	3	3
1	40	74	1.8	144	95	70	22.8395	81	4.95	6.28394	2.07745	3.90484	1.42229	4.86165	4.41818	1.46064	2.74545	3.41818	6.069	101.66	0.4602	9.0216	206.049	730.749	33.611	33.2392	1.82132	0.164	3	3	2	2	3	2	2	2	2
1	44	70	1.63	133	87	67	26.3465	91	5.06	5.71502	1.36615	3.77554	1.31885	4.39617	4.33333	1.03586	2.86275	3.33333	4.641	91.936	0.3245	8.62443	227.224	784.823	38.336	35.5199	1.34387	0.017	2	3	3	3	3	3	1	1	1
1	54	67	1.62	151	91	80	25.5296	81	3.85	6.4391	1.91939	4.00828	1.55159	4.88751	4.15	1.23704	2.58333	3.15	6.069	95.472	0.2596	8.69115	221.882	703.983	35.77	30.7102	1.45353	0.093	2	3	3	2	3	2	2	2	1
1	50	73	1.7	140	92	67	25.2595	79	4.675	6.827	1.16292	4.57719	1.70675	5.12025	4	0.681367	2.68182	3	6.069	93.704	0.3599	8.38423	211.782	662.354	33.82	16.2809	0.78539	-0.167	2	2	2	2	1	1	0	0	0
1	46	66	1.65	134	94	76	24.2424	76	4.29	5.6633	1.14034	4.05999	1.08611	4.57719	5.21429	1.04993	3.7381	4.21429	5.355	95.472	0.3481	8.27868	200.695	629.18	35.988	12.5438	1.19037	0.021	1	3	2	2	1	1	1	1	1
1	52	67	1.68	133	82	68	23.7387	81	4.29	5.09439	1.09518	2.94802	1.65503	3.43936	3.07812	0.661728	1.78125	2.07812	3.213	87.516	0.3599	8.23827	195.566	667.3	31.586	17.5229	0.808586	-0.18	1	2	2	1	1	1	0	0	0
1	59	76	1.7	131	85	76	26.2976	89	4.84	5.06853	3.10489	2.48254	1.16369	3.90484	4.35556	2.66813	2.13333	3.35556	4.641	88.4	0.4012	9.40096	247.222	836.686	42.224	74.5173	3.3889	0.427	4	4	4	4	4	4	3	3	3
1	57	65	1.71	123	73	66	22.2291	81	4.565	5.12025	0.880659	3.36178	1.34471	3.77554	3.80769	0.654906	2.5	2.80769	5.712	92.82	0.3835	8.0824	179.664	654.675	30.927	14.0905	0.828127	-0.187	1	2	1	1	1	1	0	0	0
1	58	54	1.71	159	103	70	18.4672	79	4.235	4.88751	0.688721	2.99974	1.57745	3.31006	3.09836	0.436604	1.90164	2.09836	4.284	87.516	0.2714	7.76153	143.334	613.161	24.13	9.64209	0.589638	-0.357	1	1	1	1	1	1	0	0	0
1	55	68	1.72	139	92	82	22.9854	84	9.79	6.20636	1.76132	4.21515	1.18955	5.01681	5.21739	1.48066	3.54348	4.21739	4.641	85.748	0.3599	9.53849	219.246	801.233	37.46	33.4651	1.90832	0.17	4	3	3	3	3	4	2	2	2
1	48	75	1.66	180	113	76	27.2173	84	5.115	6.3098	1.87422	3.95656	1.49987	4.80993	4.2069	1.24959	2.63793	3.2069	4.998	93.704	0.4071	8.95144	243.634	751.921	39.308	35.6103	1.46948	0.097	3	3	4	3	3	3	2	2	1
1	51	76	1.76	138	80	58	24.5351	84	4.84	5.17197	1.55809	3.38764	1.06025	4.11171	4.87805	1.46954	3.19512	3.87805	3.57	72.488	0.3894	8.71144	213.736	731.761	37.993	29.6037	1.82969	0.167	2	3	2	3	3	2	2	2	2
1	51	62	1.71	138	84	70	21.2031	79	4.015	5.74088	1.46777	3.85312	1.21541	4.52547	4.7234	1.20763	3.17021	3.7234	4.641	91.936	0.3599	8.46485	179.481	668.723	30.948	20.5487	1.52545	0.083	2	3	1	1	2	1	2	2	2
1	53	56	1.73	147	90	80	18.7109	81	6.71	5.12025	0.914531	3.69796	1.00853	4.11171	5.07692	0.906793	3.66667	4.07692	4.641	93.704	0.2714	8.50532	159.143	688.931	29.538	14.6325	1.24795	-0.041	2	2	1	1	1	2	1	1	1
1	52	62	1.67	115	82	65	22.231	81	3.905	4.29273	1.20808	2.35325	1.39643	2.8963	3.07407	0.865122	1.68519	2.07407	3.57	86.632	0.3068	8.24236	183.236	667.631	30.706	19.3293	1.0939	-0.06	1	2	1	1	2	1	1	1	1
1	53	96	1.65	149	87	96	35.2617	104	5.72	4.83579	1.43389	3.10318	1.08611	3.74968	4.45238	1.32021	2.85714	3.45238	4.284	70.72	0.3186	8.79543	310.142	914.725	54.849	55.9219	1.64785	0.121	3	3	4	4	4	4	2	2	2
1	49	67	1.7	132	81	74	23.1834	94	7.59	5.74088	4.95653	2.66356	0.801655	4.93923	7.16129	6.18287	3.32258	6.16129	8.211	98.124	0.4484	10.3186	239.22	969.949	44.364	143.739	8.87751	0.791	4	4	3	4	4	4	3	3	3
1	49	73	1.72	125	70	70	24.6755	84	4.235	4.65477	1.40002	2.87044	1.13783	3.51694	4.09091	1.23043	2.52273	3.09091	5.712	106.08	0.531	8.47094	209.025	711.559	36.703	26.6004	1.52728	0.09	2	3	2	3	2	2	2	2	2
1	51	65	1.63	122	77	66	24.4646	84	4.51	6.72356	1.50164	4.70649	1.31885	5.40471	5.09804	1.13859	3.56863	4.09804	4.284	91.936	0.3245	8.60392	210.492	722.729	35.421	28.5311	1.41983	0.057	2	3	2	2	3	2	1	1	1
1	50	74	1.68	123	87	64	26.2188	84	4.235	4.96509	2.65327	2.79286	0.956814	4.00828	5.18919	2.77302	2.91892	4.18919	7.497	75.14	0.4248	9.11024	238.86	765.26	43.303	50.4121	3.32979	0.442	3	4	3	4	4	3	3	3	3
1	54	53	1.62	122	81	52	20.1951	71	4.345	4.73235	0.880659	2.17223	2.14637	2.58598	2.20482	0.410302	1.01205	1.20482	6.426	71.604	0.2478	8.03301	162.227	570.344	24.977	5.28396	0.47717	-0.387	1	1	1	1	1	1	0	0	0
1	48	71	1.73	143	97	94	23.7228	81	4.51	5.68916	1.3097	3.72382	1.37057	4.31859	4.15094	0.955586	2.71698	3.15094	5.355	80.444	0.3127	8.46716	200.865	685.84	33.664	20.9552	1.16807	-0.018	2	2	2	2	2	2	1	1	1
1	47	86	1.73	136	76	66	28.7347	86	4.455	4.13757	1.36615	2.12051	1.39643	2.74114	2.96296	0.978316	1.51852	1.96296	4.641	90.168	0.4012	8.49709	244.161	730.75	40.66	28.6892	1.142	-0.009	2	3	4	3	3	2	1	1	1
1	47	80	1.74	136	97	74	26.4236	86	3.96	5.32713	3.03715	2.14637	1.78433	3.5428	2.98551	1.70212	1.2029	1.98551	3.57	73.372	0.2301	9.17823	242.522	789.328	37.585	63.7801	2.08352	0.23	3	4	4	3	4	3	2	2	2
1	46	81	1.65	159	97	80	29.7521	86	3.905	4.80993	3.95168	2.06879	0.930954	3.87898	5.16667	4.24476	2.22222	4.16667	5.355	95.472	0.3658	9.42747	280.487	810.762	331.622	82.9852	4.85584	0.627	4	4	4	4	4	4	3	3	3
1	42	64	1.68	139	88	66	22.6757	76	5.61	4.55133	3.34199	2.24981	0.775795	3.77554	5.86667	4.30782	2.9	4.86667	5.355	81.328	0.4661	9.62219	218.19	731.286	41.44	36.7619	5.05884	0.634	4	4	3	3	3	2	3	3	3
1	45	85	1.68	150	85	96	30.1162	91	5.885	4.62891	2.41617	2.40497	1.11197	3.51694	4.16279	2.17287	2.16279	3.16279	5.712	106.08	0.5841	9.34566	281.456	850.455	48.522	62.8204	2.61149	0.336	4	4	4	4	4	4	3	3	3
1	55	83	1.67	140	90	74	29.7608	94	8.085	3.43936	1.99842	1.52573	1.00853	2.43082	3.41026	1.98151	1.51282	2.41026	5.712	87.516	0.4248	9.47344	281.937	890.503	49.997	57.9542	2.47721	0.297	4	4	4	4	4	4	3	3	3
1	54	60	1.6	152	102	64	23.4375	81	4.785	6.74942	1.79519	4.88751	1.03439	5.71502	6.525	1.7355	4.725	5.525	4.284	97.24	0.4366	8.84167	207.227	716.175	36.906	28.723	2.135	0.241	3	4	2	3	3	2	2	2	2
1	57	83	1.75	149	106	78	27.102	86	5.06	5.58573	1.76132	3.38764	1.39643	4.18929	4	1.2613	2.42593	3	6.069	99.008	0.3245	8.8785	240.625	763.551	39.6	36.9877	1.52219	0.1	3	3	4	3	3	3	2	2	2
1	54	90	1.71	150	103	78	30.7787	97	4.73	4.55133	2.12261	2.66356	0.905094	3.64624	5.02857	2.34519	2.94286	4.02857	4.641	102.544	0.4366	8.99764	276.936	872.771	50.958	67.9237	2.96608	0.371	3	4	4	4	4	4	3	3	3
1	43	72	1.72	142	106	75	24.3375	81	4.29	5.50815	1.02744	3.59452	1.44815	4.05999	3.80357	0.709481	2.48214	2.80357	6.069	87.516	0.4602	8.17442	198.945	662.128	33.313	16.439	0.855514	-0.149	1	2	2	2	1	1	1	0	0
1	51	64	1.63	125	87	67	24.0882	84	4.565	4.29273	1.46777	2.56012	1.06025	3.23248	4.04878	1.38435	2.41463	3.04878	4.998	104.312	0.3953	8.59323	206.996	721.831	36.913	27.8875	1.74067	0.14	2	3	2	3	2	2	2	2	2
1	43	73	1.67	138	112	82	26.1752	86	4.84	7.80967	2.65327	4.93923	1.65503	6.15464	4.71875	1.60315	2.98438	3.71875	4.284	86.632	0.4897	9.24378	241.958	794.965	37.887	55.7186	1.97269	0.204	4	3	4	3	4	4	2	2	2
1	51	65	1.65	145	97	98	23.8751	79	5.665	6.54254	2.03229	4.31859	1.29299	5.24955	5.06	1.57177	3.34	4.06	4.284	96.356	0.5428	9.13454	218.088	721.629	36.356	28.4521	1.86749	0.196	3	3	3	2	3	2	2	2	2
1	53	80	1.74	233	119	81	26.4236	79	4.73	6.67184	1.23067	5.01681	1.08611	5.58573	6.14286	1.13309	4.61905	5.14286	5.355	104.312	0.4189	8.45255	223.346	667.751	39.855	17.2293	1.27409	0.053	2	3	3	3	1	1	1	1	1
1	50	91	1.76	153	106	73	29.3776	91	5.005	6.51668	4.15491	3.56866	1.03439	5.48229	6.3	4.01676	3.45	5.3	5.712	103.428	0.5015	9.7258	285.72	885.047	50.255	108.028	4.89823	0.604	4	4	4	4	4	4	3	3	3
1	49	69	1.67	162	102	68	24.7409	81	4.29	4.91337	0.970983	3.1549	1.31885	3.59452	3.72549	0.736234	2.39216	2.72549	6.783	94.588	0.3009	8.11791	200.845	657.551	34.538	15.5357	0.87996	-0.131	1	2	2	2	1	1	1	1	0
1	53	67	1.77	134	82	82	21.3859	81	4.4	4.42203	0.67743	2.6377	1.47401	2.94802	3	0.459583	1.78947	2	3.927	79.56	0.3658	7.78322	166.452	630.441	28.535	10.8389	0.592672	-0.337	1	1	1	1	1	1	0	0	0
1	59	72	1.71	139	100	74	24.623	81	5.225	6.77528	0.824207	3.38764	2.99974	3.77554	2.25862	0.274759	1.12931	1.25862	5.712	77.792	0.3186	8.15119	200.706	660.246	28.86	13.1873	0.329245	-0.569	1	1	2	1	1	1	0	0	0
1	58	70	1.73	179	113	81	23.3887	81	4.4	5.19783	1.17421	2.79286	1.86191	3.33592	2.79167	0.63065	1.5	1.79167	6.069	106.08	0.5546	8.33327	194.904	674.995	30.496	18.7874	0.776672	-0.201	1	2	2	1	2	1	0	0	0
1	57	54	1.63	203	116	91	20.3244	74	5.005	5.43057	4.12103	2.01707	1.52573	3.90484	3.55932	2.70102	1.32203	2.55932	4.284	78.676	0.4189	9.71761	197.505	719.103	31.418	37.0893	3.26372	0.431	4	4	2	1	3	2	3	3	3
1	57	70	1.67	136	81	75	25.0995	89	5.5	6.9563	2.92424	4.34445	1.26713	5.68916	5.4898	2.30776	3.42857	4.4898	3.57	86.632	0.4661	9.46885	237.663	842.728	39.529	70.1818	3.00719	0.364	4	4	3	3	4	4	3	3	3
1	57	72	1.63	162	100	82	27.0993	86	4.51	4.29273	2.12261	2.24981	1.06025	3.23248	4.04878	2.00199	2.12195	3.04878	3.927	103.428	0.3599	8.95001	242.539	769.701	42.79	44.5749	2.41623	0.301	3	4	4	4	3	3	3	3	2
1	55	87	1.65	150	88	79	31.9559	84	7.095	6.0512	3.22908	3.82726	0.801655	5.24955	7.54839	4.02802	4.77419	6.54839	4.641	98.124	0.4661	9.82266	313.892	825.103	58.624	61.3526	4.31381	0.605	4	4	4	4	4	4	3	3	3
1	55	65	1.69	138	116	69	22.7583	81	4.62	5.32713	0.846788	3.20662	1.73261	3.59452	3.07463	0.488736	1.85075	2.07463	5.355	86.632	0.295	8.05516	183.322	652.468	29.734	13.5486	0.610548	-0.31	1	1	1	1	1	1	0	0	0
1	54	73	1.7	174	101	91	25.2595	86	5.445	5.7926	1.94197	3.20662	1.70675	4.08585	3.39394	1.13782	1.87879	2.39394	5.355	105.196	0.3422	9.04947	228.585	778.254	35.653	40.7813	1.42774	0.057	3	3	3	2	3	3	1	1	1
1	54	62	1.7	135	78	62	21.4533	79	4.73	6.23222	0.767754	4.05999	1.81019	4.42203	3.44286	0.424129	2.24286	2.44286	7.14	91.936	0.3363	7.98071	171.212	630.476	27.671	10.7486	0.532603	-0.377	1	1	1	1	1	1	0	0	0
1	54	59	1.67	121	75	83	21.1553	84	5.225	4.44789	1.02744	2.8963	1.08611	3.36178	4.09524	0.945975	2.66667	3.09524	5.355	89.284	0.2773	8.37159	177.103	703.213	31.92	19.5213	1.272	-0.022	2	2	1	1	2	2	1	1	1
1	54	74	1.67	148	90	92	26.5338	91	3.85	2.74114	1.20808	1.26713	0.930954	1.81019	2.94444	1.29768	1.36111	1.94444	5.712	90.168	0.4012	8.22818	218.324	748.764	40.788	31.4102	1.67692	0.114	1	3	3	3	3	3	2	2	2
1	54	96	1.75	146	86	79	31.3469	91	6.655	3.43936	2.89037	1.11197	1.00853	2.43082	3.41026	2.86591	1.10256	2.41026	6.426	106.08	0.2655	9.64782	302.43	877.952	53.146	75.1496	3.36362	0.458	4	4	4	4	4	4	3	3	3
1	51	71	1.68	134	86	66	25.1559	84	5.335	5.55987	0.937112	3.72382	1.39643	4.16343	3.98148	0.671076	2.66667	2.98148	4.641	95.472	0.4071	8.3004	208.804	697.234	35.473	17.8051	0.824329	-0.174	1	2	2	2	2	2	0	0	0
1	53	103	1.77	151	100	88	32.8769	102	6.765	3.46522	1.61454	1.49987	1.21541	2.24981	2.85106	1.32839	1.23404	1.85106	5.355	84.864	0.2419	9.08188	298.584	926.352	50.929	59.7381	1.69802	0.124	3	3	4	4	4	4	2	2	2
1	51	84	1.71	136	104	81	28.7268	91	8.8	7.05974	6.05171	4.29273	1.13783	5.9219	6.20455	5.31863	3.77273	5.20455	6.426	99.892	0.4543	10.6662	306.405	970.621	51.264	157.344	6.5705	0.726	4	4	4	4	4	4	3	3	3
1	50	62	1.72	118	82	70	20.9573	81	4.62	5.99948	1.52422	4.03413	1.26713	4.73235	4.73469	1.20289	3.18367	3.73469	3.57	83.096	0.3186	8.64294	181.133	700.078	30.772	24.3875	1.56704	0.079	2	3	1	1	2	2	2	2	2
1	51	68	1.72	169	102	62	22.9854	81	4.62	6.5684	1.88551	4.47375	1.24127	5.32713	5.29167	1.51902	3.60417	4.29167	4.998	91.936	0.3658	8.85566	203.551	717.309	34.529	30.1682	1.88785	0.182	3	3	2	2	3	2	2	2	2
1	53	89	1.69	136	99	67	31.1614	97	5.28	7.2149	4.62911	4.78407	1.11197	6.10292	6.48837	4.16297	4.30233	5.48837	6.069	91.936	0.3894	9.88736	308.104	959.074	53.024	148.131	5.22657	0.619	4	4	4	4	4	4	3	3	3
1	51	87	1.61	156	105	76	33.5635	99	5.61	4.52547	1.47906	2.81872	1.03439	3.49108	4.375	1.42988	2.725	3.375	5.355	78.676	0.4897	8.80702	295.595	871.895	52.895	50.2879	1.75171	0.155	3	3	4	4	4	4	2	2	2
1	53	74	1.7	141	80	73	25.6055	94	10.065	5.84432	1.33228	3.72382	1.49987	4.34445	3.89655	0.888263	2.48276	2.89655	7.14	77.792	0.4012	9.28702	237.799	872.98	38.992	38.6361	1.20926	-0.051	4	2	3	3	3	4	1	1	1
1	50	89	1.72	135	96	59	30.0838	91	4.895	2.94802	1.37744	1.29299	1.03439	1.91363	2.85	1.33164	1.25	1.85	5.355	70.72	0.2655	8.59951	258.706	782.555	46.51	35.8135	1.60147	0.124	2	3	4	4	3	3	2	2	2
1	53	54	1.7	139	99	94	18.6851	76	4.62	6.5684	0.90324	4.05999	2.09465	4.47375	3.1358	0.431214	1.93827	2.1358	6.069	86.632	0.2655	8.1197	151.718	617.097	23.449	9.93564	0.557175	-0.367	1	1	1	1	1	1	0	0	0
1	50	81	1.74	149	82	68	26.7539	86	4.235	6.20636	2.67585	3.87898	1.11197	5.09439	5.5814	2.4064	3.48837	4.5814	6.783	84.864	0.3717	9.11872	243.961	784.21	42.45	56.1928	2.92528	0.382	3	4	4	4	4	3	3	3	3
1	47	68	1.77	124	70	67	21.7051	81	3.905	5.17197	0.711302	2.22395	2.61184	2.56012	1.9802	0.272337	0.851485	0.980198	4.998	101.66	0.3068	7.71267	167.404	624.726	25.04	11.3808	0.348584	-0.569	1	1	1	1	1	1	0	0	0
1	48	67	1.68	132	80	76	23.7387	84	4.51	5.35299	1.84035	3.31006	1.18955	4.16343	4.5	1.5471	2.78261	3.5	4.998	74.256	0.4012	8.80732	209.074	739.815	35.901	34.9667	1.96046	0.19	3	3	2	2	3	3	2	2	2
1	46	60	1.62	148	90	81	22.8624	76	4.125	4.91337	2.59682	2.66356	1.06025	3.85312	4.63415	2.44924	2.5122	3.63415	4.641	87.516	0.2714	9.06242	207.188	688.744	36.566	28.565	2.86403	0.389	3	4	2	2	3	2	3	3	3
1	47	64	1.65	134	82	69	23.5078	76	3.85	7.55107	4.15491	4.68063	0.956814	6.59426	7.89189	4.34244	4.89189	6.89189	4.641	95.472	0.3776	9.46343	222.464	719.221	40.565	45.704	5.00438	0.637	4	4	3	3	3	2	3	3	3
1	46	57	1.67	137	99	79	20.4382	76	4.565	4.83579	2.00971	1.93949	1.96535	2.87044	2.46053	1.02257	0.986842	1.46053	3.57	70.72	0.3186	8.90748	182.052	676.968	27.566	22.1068	1.26552	0.009	3	3	1	1	2	1	1	1	1
1	46	65	1.69	114	84	54	22.7583	81	4.895	4.13757	2.22423	2.27567	0.853375	3.2842	4.84848	2.60639	2.66667	3.84848	5.355	85.748	0.3363	9.07869	206.616	735.374	38.58	35.5877	3.25601	0.417	3	4	2	3	3	3	3	3	3
1	44	73	1.75	125	101	69	23.8367	79	4.4	3.5428	0.609687	1.29299	1.96535	1.57745	1.80263	0.310219	0.657895	0.802632	4.641	100.776	0.2655	7.67786	183.015	606.551	29.539	8.53562	0.368899	-0.509	1	1	1	1	1	1	0	0	0
1	44	63	1.62	144	98	73	24.0055	84	4.62	4.44789	1.60325	2.24981	1.47401	2.97388	3.01754	1.08768	1.52632	2.01754	3.927	86.632	0.3658	8.6935	208.692	730.254	34.067	30.4618	1.37014	0.037	2	3	2	2	3	2	1	1	1
1	46	60	1.73	134	92	72	20.0474	76	5.335	4.29273	4.47104	1.24127	1.00853	3.2842	4.25641	4.43321	1.23077	3.25641	3.213	97.24	0.413	9.86298	197.728	749.586	34.917	49.1814	5.53857	0.646	4	4	2	2	4	3	3	3	3
1	48	73	1.65	164	102	50	26.8136	81	4.675	6.15464	1.15163	3.85312	1.78433	4.37031	3.44928	0.645414	2.15942	2.44928	5.712	102.544	0.3835	8.37448	224.55	678.333	35.495	18.4261	0.738046	-0.187	2	2	3	2	2	2	0	0	0
1	48	75	1.66	162	128	108	27.2173	86	5.665	6.3098	1.44518	4.03413	1.60331	4.70649	3.93548	0.901376	2.51613	2.93548	4.284	89.284	0.3481	8.79361	239.338	756.251	38.327	30.3489	1.08523	-0.046	3	2	3	3	3	3	1	1	1
1	48	70	1.68	137	93	62	24.8016	84	4.675	5.74088	2.04358	3.72382	1.08611	4.65477	5.28571	1.88155	3.42857	4.28571	3.927	89.284	0.3481	8.948	221.925	751.632	38.887	38.828	2.32908	0.274	3	4	3	3	3	3	2	2	2
1	47	70	1.7	134	84	66	24.2215	81	5.61	4.39617	0.914531	2.79286	1.18955	3.20662	3.69565	0.768802	2.34783	2.69565	4.998	93.704	0.4189	8.32627	201.674	674.428	35.758	14.6325	0.929418	-0.114	1	2	2	2	1	1	1	1	1
1	52	78	1.78	126	77	60	24.6181	89	4.84	4.91337	0.858078	2.37911	2.14637	2.767	2.28916	0.399782	1.10843	1.28916	7.497	121.108	0.4484	8.11492	199.774	722.228	30.808	20.5939	0.52643	-0.398	1	1	2	1	2	2	0	0	0
1	50	75	1.71	142	89	92	25.6489	89	5.83	5.81846	4.24523	2.24981	1.62917	4.18929	3.57143	2.60576	1.38095	2.57143	4.284	82.212	0.4071	9.89988	253.921	881.089	39.478	101.886	3.3556	0.417	4	4	4	3	4	4	3	3	3
1	53	94	1.67	143	91	54	33.705	91	6.49	4.42203	1.26454	2.81872	1.03439	3.38764	4.275	1.22249	2.725	3.275	4.641	76.024	0.3717	8.79604	296.471	800.439	53.479	32.8779	1.37307	0.086	3	3	4	4	3	4	2	2	1
1	51	67	1.73	128	80	67	22.3863	81	4.675	3.25834	0.67743	1.49987	1.44815	1.81019	2.25	0.46779	1.03571	1.25	8.568	99.892	0.4248	7.84385	175.595	635.352	30.248	10.8389	0.58938	-0.328	1	1	1	1	1	1	0	0	0
0	51	56	1.59	109	73	102	22.151	71	3.905	4.68063	0.688721	2.81872	1.55159	3.12904	3.01667	0.443881	1.81667	2.01667	4.284	71.604	0.2537	7.68041	170.129	545.309	28.744	8.95337	0.753903	-0.357	1	1	1	1	1	1	0	0	0
1	45	75	1.75	148	85	64	24.4898	86	3.96	4.26687	1.20808	2.6377	1.08611	3.18076	3.92857	1.1123	2.42857	2.92857	6.426	106.08	0.2773	8.25635	202.196	710.046	36.204	25.3698	1.41928	0.045	1	3	2	2	2	2	1	1	1
1	50	70	1.71	118	94	55	23.939	81	4.125	5.89604	1.29841	3.95656	1.34471	4.55133	4.38462	0.965566	2.94231	3.38462	5.355	96.356	0.3068	8.36927	200.352	677.911	33.807	20.7745	1.17461	-0.013	2	3	2	2	2	1	1	1	1
1	50	66	1.65	120	77	65	24.2424	81	4.125	3.90484	0.632268	2.53426	1.08611	2.81872	3.59524	0.582138	2.33333	2.59524	4.284	106.08	0.2124	7.64969	185.447	619.625	34.553	10.1163	0.703431	-0.237	1	1	1	2	1	1	0	0	0
1	51	81	1.76	130	80	60	26.1493	91	3.85	5.32713	1.94197	3.33592	1.11197	4.21515	4.7907	1.74642	3	3.7907	6.783	103.428	0.2832	8.70284	227.573	791.959	39.929	50.4911	2.27516	0.243	2	4	3	3	4	3	2	2	2
1	57	59	1.66	169	91	66	21.4109	74	3.96	5.24955	0.858078	3.05146	1.81019	3.43936	2.9	0.474027	1.68571	1.9	3.57	85.748	0.236	7.91425	169.452	585.655	27.181	7.72271	0.558142	-0.328	1	1	1	1	1	1	0	0	0
1	55	66	1.65	109	88	80	24.2424	84	4.015	5.76674	0.925821	4.24101	1.11197	4.65477	5.18605	0.832593	3.81395	4.18605	2.856	91.936	0.2124	8.00403	194.037	672.339	34.991	17.5906	1.04333	-0.081	1	2	2	2	1	1	1	1	1
1	59	53	1.67	144	93	90	19.0039	76	4.84	6.41324	6.45817	3.05146	1.62917	4.78407	3.93651	3.96409	1.87302	2.93651	2.856	79.56	0.3717	10.1333	192.573	770.133	30.347	71.0399	5.08133	0.598	4	4	1	1	4	3	3	3	3
1	58	71	1.62	121	88	58	27.0538	79	4.18	5.12025	0.846788	3.43936	1.29299	3.82726	3.96	0.654906	2.66	2.96	4.641	80.444	0.2655	7.95507	215.215	628.451	37.511	11.855	0.726765	-0.187	1	2	3	3	1	1	0	0	0
1	56	57	1.69	121	78	67	19.9573	79	4.015	4.65477	1.34357	2.79286	1.24127	3.4135	3.75	1.08241	2.25	2.75	4.998	97.24	0.2714	8.37644	167.171	661.738	28.769	18.81	1.40877	0.033	2	3	1	1	2	1	1	1	1
1	55	74	1.78	124	85	71	23.3556	84	5.005	5.53401	1.81777	3.38764	1.31885	4.21515	4.19608	1.3783	2.56863	3.19608	4.284	93.704	0.3599	8.89912	207.845	747.526	34.683	34.5377	1.76161	0.14	3	3	2	2	3	3	2	2	2
1	54	64	1.65	114	88	103	23.5078	81	9.845	6.67184	4.97911	4.34445	0.930954	5.74088	7.16667	5.3484	4.66667	6.16667	3.927	78.676	0.2714	10.5833	248.79	857.246	43.847	79.6658	6.56919	0.728	4	4	4	4	4	4	3	3	3
1	51	56	1.7	145	91	87	19.3772	58	4.455	4.39617	4.60653	1.93949	1.13783	3.25834	3.86364	4.04851	1.70455	2.86364	5.355	76.908	0.2655	9.71257	188.202	563.329	32.498	-32.2457	3.92392	0.607	4	4	1	2	1	1	3	3	3
1	51	72	1.66	139	83	66	26.1286	84	6.985	5.71502	5.04686	3.2842	1.03439	4.68063	5.525	4.87905	3.175	4.525	3.927	86.632	0.3599	10.2536	267.912	861.302	46.414	95.8903	5.86985	0.688	4	4	4	4	4	4	3	3	3
1	49	64	1.82	120	74	78	19.3213	79	4.125	4.47375	0.609687	2.5084	1.68089	2.79286	2.66154	0.362717	1.49231	1.66154	3.57	76.024	0.2124	7.61332	147.1	601.453	24.613	8.53562	0.479504	-0.444	1	1	1	1	1	1	0	0	0
1	42	58	1.65	123	74	79	21.3039	71	4.125	6.87872	2.19036	2.81872	3.05146	3.82726	2.25424	0.717806	0.923729	1.25424	2.856	70.72	0.3009	8.8922	189.439	631.346	26.077	13.1421	0.812962	-0.143	3	2	1	1	1	1	1	1	0
1	50	66	1.78	135	98	100	20.8307	84	4.62	7.0856	1.61454	5.35299	0.982674	6.10292	7.21053	1.64301	5.44737	6.21053	3.57	81.328	0.236	8.70051	181.238	730.843	32.868	30.6763	2.22637	0.215	2	4	1	2	3	2	2	2	2
1	52	63	1.71	112	73	70	21.5451	81	4.07	4.73235	1.45648	2.5084	1.55159	3.18076	3.05	0.938698	1.61667	2.05	3.57	92.82	0.2124	8.47073	182.503	686.129	29.601	23.3036	1.20602	-0.027	2	2	1	1	2	2	1	1	1
1	46	82	1.72	150	88	78	27.7177	81	5.665	3.72382	1.08389	2.04293	1.18955	2.53426	3.13043	0.911173	1.71739	2.13043	5.355	106.08	0.2124	8.50593	235.765	688.98	41.344	17.3422	1.02265	-0.041	2	2	3	3	1	2	1	1	1
1	46	87	1.69	154	110	83	30.4611	84	4.62	6.46496	2.10003	4.44789	1.06025	5.40471	6.09756	1.98069	4.19512	5.09756	7.497	78.676	0.3304	8.96342	273.036	752.927	48.142	39.9006	2.18271	0.297	3	4	4	4	3	3	3	3	2
1	46	58	1.64	137	87	84	21.5645	74	4.125	4.52547	0.530654	2.58598	1.70675	2.81872	2.65152	0.310915	1.51515	1.65152	4.641	70.72	0.236	7.47449	161.184	553.112	27.187	4.77588	0.364768	-0.509	1	1	1	1	1	1	0	0	0
1	48	80	1.75	126	86	90	26.1224	91	5.335	5.35299	3.00327	3.07732	0.905094	4.44789	5.91429	3.31819	3.4	4.91429	3.57	71.604	0.3363	9.46506	247.251	861.32	45.044	78.0851	4.32525	0.521	4	4	4	4	4	4	3	3	3
1	43	52	1.7	134	84	105	17.9931	71	4.455	4.18929	1.20808	1.86191	1.78433	2.40497	2.34783	0.677052	1.04348	1.34783	3.57	72.488	0.2478	8.37413	150.676	594.563	23.771	7.2485	0.831737	-0.167	2	2	1	1	1	1	0	0	0
1	42	70	1.65	138	94	72	25.7117	81	4.62	2.40497	0.801626	1.08611	0.956814	1.44815	2.51351	0.837807	1.13514	1.51351	4.284	75.14	0.2832	8.00035	205.702	648.028	38.993	12.826	0.980601	-0.076	1	2	2	3	1	1	1	1	1
1	43	77	1.74	121	77	68	25.4327	84	4.4	5.48229	1.64841	3.82726	0.905094	4.57719	6.05714	1.82126	4.22857	5.05714	4.998	85.748	0.354	8.67249	220.565	728.489	40.939	31.3199	2.22387	0.26	2	4	3	3	3	2	2	2	2
1	37	80	1.65	153	96	79	29.3848	86	4.4	6.51668	1.64841	4.31859	1.44815	5.06853	4.5	1.13829	2.98214	3.5	7.497	100.776	0.354	8.67249	254.839	745.834	41.775	34.6167	1.31163	0.057	2	3	4	4	3	3	1	1	1
0	41	49	1.55	108	80	84	20.3954	64	4.62	5.87018	2.34842	2.5084	2.27567	3.59452	2.57955	1.03197	1.10227	1.57955	4.284	58.344	0.236	9.07521	185.093	580.813	27.017	14.0905	1.64971	0.013	3	3	1	1	1	1	1	1	2
1	47	54	1.67	140	88	94	19.3625	76	5.5	4.39617	0.925821	2.24981	1.73261	2.66356	2.53731	0.534351	1.29851	1.53731	4.284	92.82	0.3422	8.31874	161.071	632.224	25.977	10.184	0.678884	-0.276	1	1	1	1	1	1	0	0	0
1	58	92	1.7	131	71	65	31.8339	99	4.565	4.37031	2.6194	2.06879	1.11197	3.25834	3.93023	2.35563	1.86047	2.93023	6.426	105.196	0.4307	9.17243	291.994	908.071	50.662	89.0595	2.98011	0.373	3	4	4	4	4	4	3	3	3
1	60	63	1.67	151	85	102	22.5896	86	4.895	7.05974	1.38873	4.93923	1.47401	5.58573	4.78947	0.942145	3.35088	3.78947	4.641	91.936	0.3776	8.60767	194.443	740.26	31.888	29.1634	1.25444	-0.027	2	2	2	1	3	3	1	1	1
1	50	70	1.74	109	70	72	23.1206	86	4.51	4.24101	1.06131	2.35325	1.39643	2.84458	3.03704	0.760014	1.68519	2.03704	6.069	90.168	0.3422	8.25687	190.904	710.091	32.185	22.2875	0.99979	-0.119	1	2	1	2	2	2	1	1	1
1	55	70	1.7	169	96	84	24.2215	86	5.5	5.22369	3.46618	2.5084	1.13783	4.08585	4.59091	3.0463	2.20455	3.59091	4.284	99.892	0.4307	9.63887	233.467	828.943	39.864	72.7899	3.91006	0.484	4	4	3	3	4	4	3	3	3
1	52	76	1.7	130	61	79	26.2976	86	4.125	6.15464	2.20165	3.49108	1.65503	4.49961	3.71875	1.33028	2.10938	2.71875	4.641	102.544	0.3953	8.89734	233.979	765.171	36.953	46.2346	1.63268	0.124	3	3	3	3	4	3	2	2	2
1	50	88	1.7	118	100	72	30.4498	97	6.655	2.84458	1.46777	1.31885	0.853375	1.99121	3.33333	1.71995	1.54545	2.33333	4.284	90.168	0.4425	8.97018	273.14	870.107	51.461	46.9685	2.18919	0.236	3	4	4	4	4	4	2	2	2
1	49	62	1.73	124	74	65	20.7157	79	4.235	4.75821	1.53551	2.84458	1.21541	3.5428	3.91489	1.26336	2.34043	2.91489	3.927	102.544	0.4425	8.56331	177.395	676.502	30.513	21.4971	1.61446	0.1	2	3	1	1	2	1	2	2	2
1	58	93	1.74	169	100	74	30.7174	97	4.73	7.31833	2.99198	4.88751	1.06025	6.25808	6.90244	2.82195	4.60976	5.90244	6.426	101.66	0.4071	9.34093	286.929	906.07	50.295	95.7435	3.57329	0.45	4	4	4	4	4	4	3	3	3
1	52	72	1.67	136	96	75	25.8166	81	4.95	5.53401	2.21294	3.12904	1.39643	4.13757	3.96296	1.58471	2.24074	2.96296	4.998	84.864	0.4956	9.08478	234.538	735.867	38.381	35.407	1.85065	0.199	3	3	3	3	3	3	2	2	2
1	50	57	1.73	98	65	71	19.0451	74	3.96	5.27541	1.24196	3.36178	1.34471	3.9307	3.92308	0.923585	2.5	2.92308	3.57	102.544	0.3481	8.284	157.769	613.016	26.697	11.1776	1.15155	-0.036	1	2	1	1	1	1	1	1	1
1	51	66	1.67	121	80	65	23.6652	81	5.225	5.27541	1.11776	3.31006	1.44815	3.82726	3.64286	0.771853	2.28571	2.64286	4.998	94.588	0.3894	8.45585	200.11	684.924	33.32	17.8842	0.944698	-0.114	2	2	2	2	2	2	1	1	1
1	50	75	1.78	148	106	69	23.6713	86	4.95	5.30127	0.801626	3.56866	1.37057	3.9307	3.86792	0.584884	2.60377	2.86792	4.998	83.096	0.3422	8.06934	191.011	693.963	32.942	16.8341	0.759947	-0.237	1	1	1	2	1	2	0	0	0
1	47	74	1.67	154	100	67	26.5338	84	5.005	5.30127	1.34357	3.69796	0.982674	4.31859	5.39474	1.36726	3.76316	4.39474	4.998	104.312	0.4897	8.59684	228.106	722.134	41.624	25.5278	1.63092	0.137	2	3	3	3	2	2	2	2	2
1	57	54	1.65	117	78	80	19.8347	81	4.84	6.64598	1.0726	4.91337	1.24127	5.40471	5.35417	0.864112	3.95833	4.35417	5.355	104.312	0.3599	8.33807	165.383	675.383	28.697	17.1616	1.15657	-0.066	1	2	1	1	1	1	1	1	1
1	57	75	1.75	161	105	77	24.4898	81	4.84	4.26687	0.767754	2.40497	1.49987	2.767	2.84483	0.51188	1.60345	1.84483	5.355	102.544	0.3245	8.0037	196.009	648.299	33.155	12.2841	0.615179	-0.292	1	1	2	2	1	1	0	0	0
1	55	64	1.66	148	89	70	23.2254	79	4.565	4.91337	1.56938	3.05146	1.13783	3.77554	4.31818	1.37927	2.68182	3.31818	3.57	82.212	0.3127	8.66017	201.136	684.153	35.115	21.9713	1.66279	0.14	2	3	2	2	2	2	2	2	2
1	56	72	1.74	123	88	51	23.7812	81	4.95	4.83579	0.609687	3.23248	1.31885	3.51694	3.66667	0.462286	2.45098	2.66667	6.426	106.08	0.3127	7.79565	185.39	631.447	32.994	9.755	0.564347	-0.337	1	1	1	2	1	1	0	0	0
1	55	70	1.78	147	94	74	22.0932	81	4.51	4.52547	1.14034	2.94802	1.06025	3.46522	4.26829	1.07554	2.78049	3.26829	4.641	102.544	0.2596	8.32869	184.007	674.624	33.191	18.2455	1.36429	0.033	1	3	1	2	2	1	1	1	1
1	54	75	1.78	137	77	71	23.6713	86	4.18	5.55987	3.05973	2.32739	1.83605	3.72382	3.02817	1.66647	1.26761	2.02817	4.641	91.052	0.354	9.2397	218.715	794.615	33.58	64.2543	2.16527	0.223	4	4	3	2	4	3	2	2	2
1	54	62	1.61	146	83	55	23.9188	81	3.96	6.38738	0.812916	4.73235	1.29299	5.09439	4.94	0.628709	3.66	3.94	4.641	85.748	0.3835	7.86019	188.006	636.675	32.867	13.0067	0.765166	-0.201	1	2	1	2	1	1	0	0	0
1	53	65	1.7	130	84	51	22.4913	81	4.95	4.88751	1.53551	3.23248	0.956814	3.9307	5.10811	1.60481	3.37838	4.10811	3.927	95.472	0.3127	8.71932	196.109	706.265	35.849	24.5681	2.01708	0.204	2	3	2	2	2	2	2	2	2
1	54	66	1.65	133	90	73	24.2424	79	5.665	6.67184	2.83392	4.16343	1.21541	5.45643	5.48936	2.33165	3.42553	4.48936	3.57	78.676	0.4248	9.46703	229.504	747.896	38.56	39.6748	2.7479	0.367	4	4	3	3	3	3	3	3	3
1	54	58	1.62	131	99	75	22.1003	81	4.95	5.24955	1.05002	3.20662	1.55159	3.69796	3.38333	0.676736	2.06667	2.38333	6.069	83.98	0.3422	8.33926	184.3	675.48	30.278	16.8003	0.858281	-0.167	1	2	1	1	1	1	0	0	0
1	53	68	1.7	126	78	81	23.5294	81	4.675	6.10292	0.89195	4.52547	1.16369	4.93923	5.24444	0.766482	3.88889	4.24444	4.998	87.516	0.2537	8.11895	191.034	657.635	34.105	14.2712	0.940979	-0.114	1	2	1	2	1	1	1	1	1
1	54	58	1.76	140	80	68	18.7242	79	5.28	6.59426	0.632268	4.62891	1.68089	4.91337	3.92308	0.376151	2.75385	2.92308	3.57	83.096	0.2714	7.89655	147.856	623.828	24.725	8.85176	0.504718	-0.42	1	1	1	1	1	1	0	0	0
1	52	67	1.61	146	85	67	25.8478	76	5.555	6.62012	7.68883	3.36178	1.24127	5.37885	5.33333	6.19432	2.70833	4.33333	4.284	90.168	0.6018	10.4455	269.994	793.861	45.296	84.5772	6.7828	0.792	4	4	4	4	4	3	3	3	3
1	47	66	1.7	129	82	74	22.8374	79	4.675	5.74088	1.6597	3.46522	1.52573	4.21515	3.76271	1.08781	2.27119	2.76271	3.213	102.544	0.295	8.73994	199.597	690.455	32.202	23.2359	1.323	0.037	3	3	2	2	2	2	1	1	1
1	52	103	1.73	160	90	81	34.4148	109	6.325	9.41298	3.3307	6.85286	1.03439	8.37859	9.1	3.21995	6.625	8.1	4.641	105.196	0.4425	9.73876	335.157	1061.52	58.425	146.551	4.27655	0.508	4	4	4	4	4	4	3	3	3
1	52	76	1.76	133	88	68	24.5351	86	4.62	6.15464	1.15163	3.87898	1.75847	4.39617	3.5	0.654906	2.20588	2.5	4.998	103.428	0.3717	8.36264	205.178	719.187	32.56	24.1843	0.834821	-0.187	2	2	2	2	2	2	0	0	0
1	51	71	1.6	172	103	92	27.7344	81	5.775	4.16343	2.17907	1.44815	1.70675	2.45668	2.43939	1.27674	0.848485	1.43939	3.927	99.008	0.3186	9.2235	255.808	747.104	39.705	34.8651	1.43245	0.107	4	3	4	3	3	3	2	2	1
1	51	54	1.64	120	69	78	20.0773	81	3.96	4.11171	1.28712	2.35325	1.16369	2.94802	3.53333	1.10606	2.02222	2.53333	3.213	70.72	0.3363	8.31972	167.038	673.897	29.292	20.5939	1.47169	0.045	1	3	1	1	2	1	1	1	1
1	51	63	1.65	131	74	93	23.1405	76	4.895	6.87872	2.32584	4.80993	1.00853	5.87018	6.82051	2.30616	4.76923	5.82051	3.927	101.66	0.3422	9.12337	211.119	693.376	37.586	25.5843	2.67977	0.364	3	4	2	3	2	2	3	3	3
1	51	76	1.62	150	110	78	28.959	86	5.115	6.67184	6.07429	3.85312	1.16369	5.50815	5.73333	5.21984	3.31111	4.73333	3.213	76.024	0.3422	10.1273	293.277	870.949	50.095	127.56	6.06589	0.718	4	4	4	4	4	4	3	3	3
1	51	57	1.7	165	83	83	19.7232	79	4.62	4.75821	1.12905	2.37911	1.86191	2.8963	2.55556	0.606394	1.27778	1.55556	4.284	95.472	0.354	8.34284	164.547	659.084	25.78	15.8067	0.79375	-0.215	1	2	1	1	1	1	0	0	0
1	50	65	1.7	139	88	58	22.4913	79	4.015	7.05974	1.7839	5.32713	0.905094	6.15464	7.8	1.97095	5.88571	6.8	6.426	103.428	0.3363	8.65991	194.773	684.133	36.164	24.9746	2.41611	0.294	2	4	2	2	2	2	3	3	2
1	50	50	1.71	133	87	72	17.0993	71	4.4	3.18076	4.29039	1.03439	0.956814	2.22395	3.32432	4.48404	1.08108	2.32432	3.927	101.66	0.4307	9.62905	164.65	683.663	29.795	25.7424	5.63737	0.651	4	4	1	1	2	2	3	3	3
1	50	78	1.74	136	102	71	25.763	81	4.62	5.50815	2.1452	3.51694	1.00853	4.49961	5.46154	2.12704	3.48718	4.46154	4.284	82.212	0.2832	8.98469	231.472	727.76	41.348	34.3231	2.48684	0.328	3	4	3	3	3	2	3	3	3
1	50	73	1.67	184	109	65	26.1752	81	4.785	7.00802	1.28712	4.80993	1.60331	5.40471	4.37097	0.802788	3	3.37097	4.641	104.312	0.4779	8.50896	222.724	689.226	35.922	20.5939	0.930401	-0.097	2	2	3	2	2	2	1	1	1
1	49	60	1.74	94	64	72	19.8177	74	3.905	6.4391	1.32099	4.42203	1.42229	5.01681	4.52727	0.928775	3.10909	3.52727	7.14	97.24	0.2242	8.33171	165.115	616.546	27.484	11.8889	1.13616	-0.032	1	2	1	1	1	1	1	1	1
1	49	85	1.69	140	88	71	29.7609	86	8.14	5.35299	3.15005	2.6377	1.26713	4.08585	4.22449	2.48597	2.08163	3.22449	7.14	104.312	0.4307	9.93528	295.682	854.434	48.591	66.1511	2.84336	0.396	4	4	4	4	4	4	3	3	3
1	49	72	1.75	134	98	80	23.5102	99	4.62	5.7926	2.37101	3.64624	1.06025	4.73235	5.46341	2.23626	3.43902	4.46341	4.998	103.428	0.3658	9.08478	213.585	899.393	37.573	80.6142	3.3569	0.35	3	4	2	3	4	4	3	3	3
1	49	74	1.73	130	79	70	24.7252	84	4.51	6.9563	1.79519	4.88751	1.24127	5.71502	5.60417	1.44625	3.9375	4.60417	3.57	87.516	0.3304	8.78248	217.148	737.728	36.909	34.1086	1.79322	0.161	3	3	3	3	3	3	2	2	2
1	49	56	1.63	132	92	92	21.0772	74	5.225	5.99948	1.11776	3.82726	1.65503	4.34445	3.625	0.675372	2.3125	2.625	3.213	89.284	0.2183	8.45585	178.226	625.733	28.721	10.0598	0.801507	-0.167	2	2	1	1	1	1	0	0	0
1	48	59	1.63	128	86	71	22.2063	76	5.115	6.80114	1.63712	4.99095	1.06025	5.74088	6.41463	1.54409	4.70732	5.41463	4.284	87.516	0.4307	8.81619	195.775	670.03	34.701	18.0084	1.83293	0.188	3	3	2	2	2	1	2	2	2
1	47	84	1.65	140	110	72	30.854	89	5.06	5.68916	2.20165	3.59452	1.08611	4.60305	5.2381	2.02709	3.30952	4.2381	6.783	96.356	0.4897	9.10164	280.822	810.046	49.007	52.8396	2.34891	0.307	3	4	4	4	4	4	3	3	2
1	47	64	1.67	176	92	99	22.9481	81	7.15	4.99095	1.67099	3.05146	1.16369	3.82726	4.28889	1.43594	2.62222	3.28889	4.998	89.284	0.4012	9.1716	210.471	742.9	36.241	26.7359	1.78611	0.158	3	3	2	2	2	3	2	2	2
1	45	70	1.71	113	75	70	23.939	86	4.895	6.93044	2.46133	4.49961	1.29299	5.63745	5.36	1.90359	3.48	4.36	3.927	87.516	0.3717	9.17998	219.76	789.479	36.604	51.6879	2.45866	0.279	3	4	3	2	4	3	2	2	2
1	40	55	1.67	115	73	74	19.721	74	5.61	4.00828	0.812916	2.53426	1.11197	2.8963	3.60465	0.731058	2.27907	2.60465	4.284	84.864	0.2655	8.20849	161.88	607.428	29.468	7.31625	0.896412	-0.137	1	2	1	1	1	1	1	1	0
1	55	80	1.71	172	105	86	27.3588	86	6.105	5.99948	1.9081	3.07732	2.04293	3.95656	2.93671	0.934001	1.50633	1.93671	4.998	87.516	0.2183	9.14628	250.232	786.58	37.374	40.07	1.12122	-0.032	3	2	4	3	3	3	1	1	1
1	49	80	1.78	144	92	89	25.2493	86	5.775	5.55987	0.970983	4.05999	1.06025	4.49961	5.2439	0.915803	3.82927	4.2439	4.284	85.748	0.2124	8.41516	212.477	723.704	38.691	20.3907	1.14941	-0.036	2	2	2	3	2	2	1	1	1
1	51	64	1.67	142	88	86	22.9481	76	4.4	5.43057	2.16778	3.5428	0.905094	4.52547	6	2.39508	3.91429	5	4.998	95.472	0.4543	8.94637	205.302	679.924	37.768	23.8455	2.79525	0.38	3	4	2	3	2	2	3	3	3
1	38	69	1.72	111	82	76	23.3234	86	5.555	5.12025	0.756464	3.20662	1.57745	3.5428	3.2459	0.479548	2.03279	2.2459	6.783	94.588	0.2124	8.12667	189.542	698.893	31.737	15.8857	0.627961	-0.319	1	1	1	1	1	2	0	0	0
1	51	67	1.7	158	86	98	23.1834	81	7.7	3.85312	2.06616	1.44815	1.44815	2.40497	2.66071	1.42676	1	1.66071	4.284	73.372	0.3304	9.45798	219.268	766.096	35.344	33.0586	1.76526	0.155	4	3	3	2	3	3	2	2	2
1	49	77	1.65	159	99	66	28.2828	84	4.895	3.4135	3.11618	1.06025	0.930954	2.48254	3.66667	3.3473	1.13889	2.66667	3.927	89.284	0.5251	9.41589	266.308	790.935	48.282	59.2074	3.85139	0.525	4	4	4	4	4	3	3	3	3
1	58	84	1.8	167	90	97	25.9259	94	5.445	4.00828	1.29841	2.17223	1.24127	2.767	3.22917	1.04603	1.75	2.22917	6.426	92.82	0.3422	8.6469	224.179	812.809	38.489	37.6538	1.41433	0.021	2	3	3	3	3	4	1	1	1
1	54	71	1.7	138	85	79	24.5675	84	4.015	6.90458	2.00971	4.24101	1.73261	5.17197	3.98507	1.15993	2.44776	2.98507	5.355	101.66	0.3658	8.7791	215.68	737.444	33.78	38.1845	1.44318	0.064	3	3	3	2	3	3	2	2	1
1	53	70	1.7	149	91	70	24.2215	84	5.775	4.62891	5.39686	2.37911	1.00853	3.62038	4.58974	5.3512	2.35897	3.58974	7.14	87.516	0.4248	10.1304	245.374	850.956	43.195	102.54	6.70875	0.728	4	4	4	4	4	4	3	3	3
1	52	68	1.69	156	91	78	23.8087	81	4.785	4.44789	3.17263	1.96535	1.03439	3.4135	4.3	3.06714	1.9	3.3	6.783	104.312	0.4012	9.41112	224.066	762.3	39.504	50.7621	3.74199	0.487	4	4	3	3	4	3	3	3	3
1	51	62	1.7	138	86	76	21.4533	79	4.62	7.65451	1.56938	5.40471	1.52573	6.12878	5.01695	1.02861	3.54237	4.01695	3.927	98.124	0.2891	8.67214	186.046	685.099	30.126	21.9713	1.29168	0.013	2	3	1	1	2	2	1	1	1
1	50	58	1.63	165	105	68	21.83	76	5.17	6.93044	5.18234	4.08585	1.65503	5.27541	4.1875	3.13127	2.46875	3.1875	4.284	84.864	0.3363	9.9792	217.845	758.419	33.973	57.0058	3.7496	0.496	4	4	3	2	4	3	3	3	3
1	48	89	1.7	137	90	59	30.7958	89	5.72	4.26687	1.50164	2.35325	1.21541	3.05146	3.51064	1.2355	1.93617	2.51064	5.712	87.516	0.3009	8.84159	272.284	786.902	46.653	36.0393	1.43325	0.093	3	3	4	4	3	3	2	2	1
1	48	75	1.8	137	83	73	23.1481	86	4.73	4.39617	1.58067	2.5084	1.16369	3.23248	3.77778	1.35832	2.15556	2.77778	4.998	91.052	0.3009	8.70284	201.455	748.444	34.926	33.1941	1.78575	0.134	2	3	2	2	3	3	2	2	2
1	50	69	1.76	116	87	67	22.2753	81	4.73	4.13757	2.89037	2.01707	0.801655	3.33592	5.16129	3.6055	2.51613	4.16129	5.712	87.516	0.3127	9.30638	207.302	753.817	39.312	46.2459	4.55429	0.558	4	4	2	3	4	3	3	3	3
1	48	68	1.68	130	75	75	24.093	81	4.015	4.44789	1.62583	2.56012	1.13783	3.31006	3.90909	1.42889	2.25	2.90909	4.284	89.284	0.3422	8.56713	206.408	693.937	36.094	26.0133	1.73231	0.155	2	3	2	2	2	2	2	2	2
0	45	72	1.65	109	80	79	26.4463	89	5.28	5.19783	0.835497	3.46522	1.34471	3.85312	3.86538	0.621321	2.57692	2.86538	5.712	59.228	0.2478	8.17527	216.205	727.599	37.376	25.9004	1.19875	-0.208	1	2	3	3	2	2	0	0	1
1	41	65	1.7	119	86	86	22.4913	84	4.455	5.19783	2.021	2.81872	1.44815	3.74968	3.58929	1.39557	1.94643	2.58929	3.927	96.356	0.2124	8.88869	199.919	746.65	32.583	38.399	1.81905	0.146	3	3	2	2	3	3	2	2	2
1	41	72	1.72	130	78	65	24.3375	81	4.29	6.15464	0.970983	4.16343	1.55159	4.60305	3.96667	0.625799	2.68333	2.96667	6.426	104.312	0.2596	8.11791	197.569	657.551	32.631	15.5357	0.754607	-0.201	1	2	2	2	1	1	0	0	0
1	52	71	1.78	138	79	96	22.4088	81	5.005	6.54254	1.3097	4.42203	1.52573	5.01681	4.28814	0.858408	2.89831	3.28814	5.355	103.428	0.354	8.5713	192.072	694.276	31.311	20.9552	1.08097	-0.066	2	2	1	1	2	2	1	1	1
1	56	80	1.72	158	89	80	27.0416	89	7.48	6.80114	1.88551	4.31859	1.62917	5.17197	4.1746	1.15735	2.65079	3.1746	7.497	87.516	0.5251	9.3375	252.501	831.038	39.71	45.2523	1.44728	0.064	4	3	4	3	3	4	2	2	1
1	50	89	1.76	130	83	82	28.7319	86	4.62	5.30127	1.12905	3.38764	1.39643	3.90484	3.7963	0.808526	2.42593	2.7963	4.998	96.356	0.3481	8.34284	239.706	717.484	40.268	23.7101	0.943855	-0.092	1	2	4	3	2	2	1	1	1
1	44	86	1.78	130	90	80	27.143	91	5.61	5.27541	2.35972	2.99974	1.18955	4.08585	4.43478	1.9837	2.52174	3.43478	5.355	87.516	0.4189	9.27416	251.729	843.949	42.698	61.3526	2.53105	0.297	4	4	4	4	4	4	3	3	3
1	51	82	1.8	139	94	84	25.3086	81	4.785	6.67184	1.94197	4.65477	1.13783	5.53401	5.86364	1.70672	4.09091	4.86364	5.355	96.356	0.4838	8.92026	225.76	722.541	39.103	31.0715	2.01496	0.233	3	4	3	3	3	2	2	2	2
1	52	92	1.82	133	91	74	27.7744	91	5.06	5.50815	1.55809	3.46522	1.31885	4.18929	4.17647	1.1814	2.62745	3.17647	5.355	99.892	0.5664	8.7559	243.19	796.786	40.785	40.5103	1.48791	0.072	3	3	4	3	3	4	2	2	2
1	55	68	1.6	128	81	64	26.5625	86	4.84	5.40471	1.50164	2.99974	1.70675	3.69796	3.16667	0.879823	1.75758	2.16667	5.355	97.24	0.4897	8.67454	230.417	746.01	36.346	31.5344	1.07383	-0.056	2	2	3	2	3	3	1	1	1
1	48	67	1.67	130	90	80	24.0238	86	5.72	7.75795	1.99842	5.63745	1.21541	6.54254	6.38298	1.64423	4.6383	5.38298	3.927	76.024	0.3186	9.12739	219.275	784.956	37.141	41.9668	2.11968	0.215	3	4	3	3	3	3	2	2	2
1	45	82	1.72	129	82	70	27.7177	86	4.18	7.39591	3.64683	4.80993	0.905094	6.49082	8.17143	4.02923	5.31429	7.17143	4.998	98.124	0.4956	9.41524	260.969	809.711	48.054	76.5835	4.80134	0.605	4	4	4	4	4	4	3	3	3
1	48	64	1.67	116	70	66	22.9481	91	4.51	6.20636	1.88551	4.24101	1.11197	5.09439	5.5814	1.69565	3.81395	4.5814	4.641	83.096	0.4248	8.83157	202.668	803.672	35.403	49.0234	2.36953	0.23	3	4	2	2	4	4	2	2	2
1	47	79	1.67	128	78	70	28.3266	91	6.545	4.08585	1.32099	2.40497	1.08611	2.99974	3.7619	1.21625	2.21429	2.7619	5.712	73.372	0.4366	8.84815	250.638	805.182	44.508	34.3457	1.51469	0.086	3	3	4	4	3	4	2	2	2
1	45	70	1.64	126	82	57	26.0262	89	4.235	4.11171	1.45648	2.19809	1.24127	2.87044	3.3125	1.17337	1.77083	2.3125	5.355	99.008	0.4602	8.51047	221.495	757.432	37.96	34.9554	1.49893	0.068	2	3	3	3	3	3	2	2	2
1	60	70	1.68	136	82	70	24.8016	86	4.95	6.54254	0.530654	3.56866	2.74114	3.8014	2.38679	0.193588	1.30189	1.38679	4.998	90.168	0.3245	7.65681	189.901	658.486	28.85	11.1437	0.245339	-0.721	1	1	1	1	1	1	0	0	0
1	59	67	1.67	130	80	66	24.0238	84	4.95	3.2842	0.530654	1.42229	1.62917	1.65503	2.01587	0.32572	0.873016	1.01587	5.355	99.892	0.354	7.65681	183.946	643.172	31.451	10.0824	0.410141	-0.481	1	1	1	1	1	1	0	0	0
1	59	65	1.62	159	102	61	24.7676	81	5.5	5.99948	5.87106	3.31006	1.08611	4.91337	5.52381	5.40557	3.04762	4.52381	3.927	74.256	0.3776	10.1659	251.783	823.434	43.602	93.937	6.45709	0.733	4	4	4	4	4	4	3	3	3
1	59	73	1.64	140	70	60	27.1416	86	4.95	3.38764	1.38873	1.44815	1.29299	2.09465	2.62	1.07405	1.12	1.62	4.284	104.312	0.2596	8.61885	233.929	741.221	39.64	29.1634	1.29514	0.029	2	3	3	3	3	3	1	1	1
0	59	58	1.53	130	79	72	24.7768	71	4.62	6.20636	1.26454	3.49108	2.14637	4.05999	2.89157	0.589152	1.62651	1.89157	3.927	70.72	0.2773	8.45617	209.517	600.388	31.599	16.439	0.9411	-0.229	2	0	2	1	1	1	0	0	1
1	58	76	1.76	130	80	99	24.5351	99	5.94	4.57719	1.09518	2.74114	1.34471	3.23248	3.40385	0.814434	2.03846	2.40385	4.284	101.66	0.4425	8.5637	210.111	847.806	35.688	37.2361	1.19511	-0.092	2	2	2	2	3	4	1	1	1
1	58	77	1.78	140	80	80	24.3025	81	4.95	6.87872	3.79361	4.08585	1.06025	5.81846	6.4878	3.57802	3.85366	5.4878	4.641	77.792	0.4425	9.62377	233.882	779.526	40.872	60.6978	4.31781	0.554	4	4	3	3	4	3	3	3	3
1	57	78	1.64	140	100	76	29.0006	89	5.005	3.49108	1.53551	1.73261	1.06025	2.43082	3.29268	1.44825	1.63415	2.29268	4.284	96.356	0.3481	8.73037	253.186	777.003	44.997	36.8522	1.74025	0.161	2	3	4	4	3	3	2	2	2
1	56	59	1.68	100	80	70	20.9042	79	4.345	6.15464	1.98713	4.21515	1.03439	5.12025	5.95	1.92106	4.075	4.95	4.641	106.08	0.2891	8.84678	184.935	698.896	32.924	27.8198	2.44391	0.283	3	4	1	2	2	2	2	2	2
1	56	86	1.72	128	79	87	29.0698	91	6.545	6.62012	1.7839	4.31859	1.47401	5.14611	4.49123	1.21024	2.92982	3.49123	3.927	85.748	0.3304	9.14857	265.947	832.52	43.007	46.3814	1.48488	0.083	3	3	4	4	4	4	2	2	2
1	55	90	1.75	130	83	61	29.3878	97	4.235	5.81846	1.67099	3.72382	1.31885	4.49961	4.41176	1.26701	2.82353	3.41176	6.426	106.08	0.4897	8.64787	254.142	838.843	42.685	53.4718	1.64659	0.104	2	3	4	4	4	4	2	2	2
1	55	64	1.65	120	60	80	23.5078	79	4.675	7.55107	1.62583	5.48229	1.31885	6.23222	5.72549	1.23276	4.15686	4.72549	6.069	90.168	0.3599	8.71932	204.972	688.826	34.378	22.7617	1.47676	0.09	2	3	2	2	2	2	2	2	2
1	55	61	1.62	160	90	62	23.2434	86	5.06	4.78407	3.29683	2.12051	1.16369	3.62038	4.11111	2.83307	1.82222	3.11111	5.712	106.08	0.472	9.5054	220.938	817.464	37.64	69.2334	3.71656	0.452	4	4	3	3	4	4	3	3	3
1	55	69	1.69	106	80	80	24.1588	84	4.51	4.05999	4.53878	1.42229	1.60331	2.45668	2.53226	2.83088	0.887097	1.53226	5.355	81.328	0.295	9.71002	234.583	815.642	37.106	86.2369	3.55396	0.452	4	4	3	3	4	4	3	3	3
1	54	66	1.64	140	77	77	24.539	81	17.38	7.52521	1.51293	5.32713	1.49987	6.02534	5.01724	1.00871	3.55172	4.01724	4.641	75.14	0.2596	9.96043	244.419	806.795	40.137	24.2068	1.21096	0.004	4	3	4	3	2	4	1	1	1
1	54	80	1.72	130	80	76	27.0416	86	5.885	6.38738	1.81777	4.26687	1.29299	5.09439	4.94	1.40586	3.3	3.94	5.355	105.196	0.413	9.06109	245.027	779.253	40.967	38.1732	1.69879	0.149	3	3	4	3	3	3	2	2	2
1	53	74	1.69	121	112	78	25.9095	84	5.5	4.70649	3.61296	2.01707	1.03439	3.6721	4.55	3.49283	1.95	3.55	4.998	82.212	0.4248	9.68034	250.812	813.149	43.909	68.6463	4.22171	0.543	4	4	4	4	4	4	3	3	3
1	52	79	1.67	129	82	84	28.3266	86	4.785	3.72382	1.02744	1.96535	1.29299	2.43082	2.88	0.794619	1.52	1.88	5.355	103.428	0.2596	8.28362	234.647	712.391	40.407	21.5762	0.935227	-0.102	1	2	3	3	2	2	1	1	1
1	51	75	1.75	140	90	60	24.4898	86	4.345	5.43057	1.51293	1.37057	3.36178	2.06879	1.61538	0.450038	0.407692	0.615385	6.069	94.588	0.3953	8.57414	209.979	737.376	28.561	31.7715	0.574242	-0.347	2	1	2	1	3	3	0	0	0
1	52	69	1.6	144	88	70	26.9531	81	6.655	5.32713	1.86293	3.0256	1.44815	3.87898	3.67857	1.28642	2.08929	2.67857	3.213	89.284	0.4071	9.20859	248.2	745.896	40.229	29.8069	1.46678	0.111	4	3	4	3	3	3	2	2	1
1	51	65	1.65	130	86	100	23.8751	81	4.95	3.90484	0.937112	2.43082	1.03439	2.87044	3.775	0.905953	2.35	2.775	5.355	70.72	0.2891	8.2255	196.385	666.266	36.071	14.9938	1.10365	-0.041	1	2	2	2	1	1	1	1	1
1	53	69	1.68	166	91	57	24.4473	86	5.94	5.94776	2.10003	4.18929	0.801655	5.14611	7.41935	2.61962	5.22581	6.41935	4.641	99.892	0.4779	9.21473	225.275	792.467	42.695	44.1007	3.34572	0.418	4	4	3	4	3	3	3	3	3
1	51	62	1.67	132	90	91	22.231	81	6.27	6.36152	1.99842	4.00828	1.44815	4.91337	4.39286	1.37998	2.76786	3.39286	6.783	105.196	0.3068	9.2192	204.952	746.755	33.156	31.9747	1.7449	0.14	4	3	2	2	3	3	2	2	2
1	49	64	1.72	130	81	72	21.6333	79	5.06	5.32713	0.779045	3.5428	1.42229	3.90484	3.74545	0.547739	2.49091	2.74545	6.783	88.4	0.2714	8.06275	174.424	636.957	29.867	10.9066	0.684929	-0.26	1	1	1	1	1	1	0	0	0
1	50	70	1.7	120	80	60	24.2215	81	4.785	5.94776	0.779045	3.72382	1.86191	4.08585	3.19444	0.418412	2	2.19444	8.211	91.936	0.2773	8.00687	193.938	648.556	31.109	12.4647	0.505825	-0.377	1	1	2	1	1	1	0	0	0
1	52	64	1.68	150	80	80	22.6757	89	3.85	4.57719	1.23067	2.58598	1.42229	3.1549	3.21818	0.865269	1.81818	2.21818	6.426	98.124	0.295	8.2467	187	733.956	31.227	29.536	1.18993	-0.06	1	2	1	1	3	3	1	1	1
1	53	63	1.63	120	60	62	23.7118	81	4.51	5.74088	1.09518	3.8014	1.44815	4.29273	3.96429	0.75626	2.625	2.96429	4.998	87.516	0.4248	8.28828	196.53	671.351	32.776	17.5229	0.924651	-0.119	1	2	2	2	1	1	1	1	1
1	53	59	1.72	120	80	94	19.9432	84	4.62	5.14611	1.14034	2.97388	1.65503	3.49108	3.10938	0.689015	1.79688	2.10938	4.641	76.024	0.295	8.35279	166.581	701.634	26.824	21.6665	0.95384	-0.161	1	2	1	1	2	2	0	0	1
1	49	73	1.65	160	100	90	26.8136	84	6.6	7.26661	3.63554	4.29273	1.31885	5.94776	5.5098	2.7566	3.2549	4.5098	5.712	96.356	0.5015	9.8689	264.621	828.987	43.173	69.0753	3.26898	0.441	4	4	4	4	4	4	3	3	3
1	48	103	1.73	130	90	80	34.4148	107	4.95	6.23222	1.05002	4.29273	1.44815	4.78407	4.30357	0.725074	2.96429	3.30357	4.641	94.588	0.472	8.33926	286.994	892.301	47.952	44.1007	0.945331	-0.137	1	2	4	4	3	4	1	1	1
1	51	65	1.65	120	70	80	23.8751	81	5.06	5.22369	0.801626	3.07732	1.78433	3.43936	2.92754	0.449259	1.72464	1.92754	8.925	96.356	0.3658	8.09132	193.181	655.397	31.252	12.826	0.547298	-0.347	1	1	2	1	1	1	0	0	0
1	49	70	1.68	150	90	68	24.8016	81	5.665	6.5684	1.94197	4.52547	1.16369	5.40471	5.64444	1.6688	3.88889	4.64444	3.927	89.284	0.4779	9.08908	225.424	736.215	38.665	31.0715	1.99194	0.223	3	4	3	3	3	3	2	2	2
1	46	75	1.75	140	80	80	24.4898	84	7.205	6.80114	2.30326	4.52547	1.21541	5.58573	5.59574	1.89505	3.7234	4.59574	4.284	99.892	0.5133	9.50017	232.657	798.014	39.082	43.762	2.36182	0.279	4	4	3	3	3	4	2	2	2
1	50	60	1.85	130	80	90	17.531	76	6.105	4.75821	1.53551	2.56012	1.49987	3.25834	3.17241	1.02376	1.7069	2.17241	4.998	70.72	0.413	8.92904	156.535	678.607	25.388	16.8906	1.36232	0.009	3	3	1	1	1	2	1	1	1
1	48	65	1.73	139	88	63	21.7181	81	5.17	5.19783	1.87422	2.92216	1.42229	3.77554	3.65455	1.31775	2.05455	2.65455	3.927	86.632	0.3009	8.96214	194.64	725.933	31.812	29.9876	1.68617	0.121	3	3	2	1	3	2	2	2	2
1	48	57	1.7	121	76	66	19.7232	76	5.06	5.27541	1.19679	3.18076	1.55159	3.72382	3.4	0.771333	2.05	2.4	8.568	91.052	0.4071	8.49208	167.491	645.398	27.308	13.1647	0.971308	-0.114	2	2	1	1	1	1	1	1	1
1	48	59	1.72	109	70	58	19.9432	76	4.73	5.94776	1.35486	4.00828	1.31885	4.62891	4.5098	1.0273	3.03922	3.5098	4.998	91.052	0.3245	8.54869	170.488	649.701	28.789	14.9035	1.28671	0.013	2	3	1	1	1	1	1	1	1
1	44	89	1.72	165	100	70	30.0838	91	5.115	4.37031	1.1855	2.45668	1.37057	2.99974	3.18868	0.86497	1.79245	2.18868	6.426	79.56	0.3894	8.49341	255.514	772.901	42.983	30.8231	1.04024	-0.066	2	2	4	4	3	3	1	1	1
1	47	64	1.75	106	68	82	20.898	84	4.895	5.35299	1.46777	3.43936	1.24127	4.11171	4.3125	1.18247	2.77083	3.3125	4.641	94.588	0.3422	8.66302	181.04	727.694	30.936	27.8875	1.59975	0.072	2	3	1	1	2	2	2	2	2
1	46	53	1.67	142	98	87	19.0039	76	5.94	3.95656	1.09518	1.68089	1.78433	2.17223	2.21739	0.613776	0.942029	1.21739	4.284	70.72	0.2655	8.5637	162.744	650.841	25.785	12.047	0.786763	-0.215	2	2	1	1	1	1	0	0	0
1	46	85	1.82	128	80	66	25.6612	86	4.345	4.93923	1.43389	3.1549	1.13783	3.8014	4.34091	1.2602	2.77273	3.34091	3.927	101.66	0.3835	8.52049	218.646	732.762	38.329	30.1118	1.56772	0.1	2	3	3	3	3	2	2	2	2
1	49	62	1.65	118	60	70	22.7732	81	4.785	4.60305	1.21937	2.58598	1.44815	3.1549	3.17857	0.842022	1.78571	2.17857	6.426	91.936	0.413	8.45489	192.545	684.846	31.914	19.51	1.05153	-0.076	2	2	1	1	2	2	1	1	1
1	44	60	1.62	130	80	80	22.8624	76	4.73	5.40471	1.63712	2.71528	1.93949	3.46522	2.78667	0.844101	1.4	1.78667	4.284	87.516	0.3658	8.73793	199.77	664.083	30.492	18.0084	0.987052	-0.076	3	2	2	1	2	1	1	1	1
1	44	69	1.7	140	100	80	23.8754	81	4.29	7.03388	1.81777	4.86165	1.34471	5.68916	5.23077	1.35179	3.61538	4.23077	3.213	87.516	0.472	8.74497	208.79	708.342	34.805	29.0843	1.64678	0.13	3	3	2	2	3	2	2	2	2
1	42	89	1.7	130	80	90	30.7958	94	5.72	6.51668	2.89037	4.13757	1.06025	5.45643	6.14634	2.72611	3.90244	5.14634	2.856	79.56	0.4602	9.49642	292.45	892.664	50.924	83.8207	3.34012	0.436	4	4	4	4	4	4	3	3	3
1	37	82	1.7	140	80	80	28.3737	91	4.29	7.16318	2.7323	4.99095	0.930954	6.23222	7.69444	2.93495	5.36111	6.69444	2.856	83.98	0.413	9.1525	259.69	832.877	47.394	71.0399	3.65164	0.467	3	4	4	4	4	4	3	3	3
1	52	64	1.63	140	100	56	24.0882	76	3.85	4.96509	1.05002	2.58598	1.88777	3.07732	2.63014	0.556221	1.36986	1.63014	7.854	124.644	0.4248	8.08795	194.824	614.684	30.606	11.5502	0.632777	-0.252	1	1	2	1	1	1	0	0	0
1	35	72	1.71	130	70	80	24.623	81	4.18	5.81846	2.37101	3.59452	1.13783	4.68063	5.11364	2.08379	3.15909	4.11364	4.998	81.328	0.3599	8.98469	221.23	727.76	38.331	37.9361	2.49701	0.318	3	4	3	3	3	2	3	3	3
1	41	62	1.74	134	92	68	20.4783	81	5.72	5.97362	1.49035	3.85312	1.44815	4.52547	4.125	1.02914	2.66071	3.125	3.927	94.588	0.3658	8.83405	180.906	715.558	29.656	23.8455	1.35613	0.013	3	3	1	1	2	2	1	1	1
1	56	85	1.76	126	89	72	27.4406	89	6.985	4.24101	1.29841	1.44815	2.19809	2.04293	1.92941	0.590699	0.658824	0.929412	8.568	104.312	0.472	8.89597	244.111	791.742	36.508	31.1618	0.732606	-0.229	3	2	4	2	3	3	0	0	0
1	59	76	1.77	135	86	78	24.2587	97	5.06	5.89604	2.48391	3.43936	1.31885	4.57719	4.47059	1.88339	2.60784	3.47059	6.783	103.428	0.4366	9.22227	223.72	894.56	37.03	79.4852	2.72437	0.274	4	4	3	3	4	4	2	2	3
1	60	75	1.75	127	76	62	24.4898	81	4.675	5.30127	1.17421	2.81872	1.93949	3.36178	2.73333	0.605424	1.45333	1.73333	6.069	90.168	0.3009	8.39389	205.565	679.905	31.839	18.7874	0.7276	-0.215	2	2	2	1	2	2	0	0	0
1	54	76	1.72	122	73	75	25.6896	86	5.005	6.74942	1.50164	4.73235	1.31885	5.43057	5.11765	1.13859	3.58824	4.11765	6.426	89.284	0.3363	8.70806	223.706	748.893	37.587	31.5344	1.41558	0.057	2	3	3	3	3	3	1	1	1
1	54	65	1.65	148	82	65	23.8751	79	5.61	3.87898	0.733883	1.99121	1.55159	2.32739	2.5	0.472987	1.28333	1.5	4.998	98.124	0.3599	8.10621	193.537	640.391	32.631	10.2744	0.561978	-0.328	1	1	2	2	1	1	0	0	0
1	46	67	1.72	144	101	65	22.6474	81	4.73	3.98242	1.33228	2.22395	1.13783	2.84458	3.5	1.17089	1.95455	2.5	4.284	94.588	0.2124	8.53188	193.225	691.083	33.937	21.3165	1.46643	0.068	2	3	2	2	2	2	2	2	1
1	40	72	1.66	116	70	70	26.1286	84	5.17	5.09439	1.10647	2.99974	1.57745	3.51694	3.22951	0.701429	1.90164	2.22951	5.355	83.98	0.3894	8.43512	220.398	708.55	35.951	21.0229	0.84387	-0.155	2	2	3	2	2	2	0	0	0
1	44	79	1.65	124	80	76	29.0174	91	5.17	6.38738	1.33228	4.44789	1.31885	5.06853	4.84314	1.01018	3.37255	3.84314	6.783	105.196	0.3658	8.62083	250.155	784.496	42.245	34.6393	1.24072	0.004	2	3	4	4	3	3	1	1	1
1	44	67	1.71	127	84	54	22.913	81	5.5	6.02534	1.20808	4.08585	1.39643	4.62891	4.31481	0.865122	2.92593	3.31481	4.998	100.776	0.3835	8.58485	196.705	695.373	32.891	19.3293	1.07695	-0.06	2	2	2	2	2	2	1	1	1
1	51	57	1.67	140	86	74	20.4382	71	4.895	4.75821	1.19679	2.30153	1.91363	2.84458	2.48649	0.625405	1.2027	1.48649	3.927	105.196	0.354	8.45893	172.885	600.584	26.827	7.18076	0.723073	-0.201	2	2	1	1	1	1	0	0	0
1	58	70	1.65	131	79	68	25.7117	86	4.62	5.6633	2.28068	3.64624	0.982674	4.68063	5.76316	2.32089	3.71053	4.76316	3.213	101.66	0.3835	9.04594	232.586	777.951	41.796	47.8943	2.88414	0.365	3	4	3	4	4	3	3	3	3
1	41	77	1.75	130	70	66	25.1429	84	5.115	5.61159	1.20808	3.69796	1.37057	4.24101	4.09434	0.881445	2.69811	3.09434	6.426	101.66	0.4484	8.51228	214.023	715.032	35.967	22.9536	1.08304	-0.056	2	2	2	2	2	2	1	1	1
1	55	61	1.65	145	86	64	22.4059	84	5.885	5.32713	1.21937	2.68942	2.06879	3.25834	2.575	0.589415	1.3	1.575	4.284	93.704	0.3481	8.66181	194.076	727.592	29.531	23.1681	0.769777	-0.229	2	2	2	1	2	2	0	0	0
1	49	63	1.65	118	75	79	23.1405	76	5.17	4.68063	0.846788	2.84458	1.44815	3.23248	3.23214	0.584737	1.96429	2.23214	4.998	92.82	0.2714	8.16764	189.003	620.74	32.032	9.31467	0.679466	-0.237	1	1	1	1	1	1	0	0	0
1	48	63	1.7	113	58	60	21.7993	81	4.785	5.19783	1.05002	3.51694	1.18955	4.00828	4.36957	0.882699	2.95652	3.36957	4.284	83.98	0.3186	8.30536	181.051	672.734	31.813	16.8003	1.12735	-0.056	1	2	1	1	1	1	1	1	1
1	42	67	1.63	123	72	65	25.2174	81	4.895	6.93044	1.85164	4.73235	1.34471	5.58573	5.15385	1.37698	3.51923	4.15385	3.57	100.776	0.3363	8.89536	224.317	720.524	37.242	29.6263	1.62887	0.14	3	3	3	3	3	2	2	2	2
1	47	77	1.77	146	94	64	24.5779	86	4.07	6.59426	1.71616	3.87898	1.93949	4.65477	3.4	0.88485	2	2.4	5.355	99.892	0.4425	8.6348	212.225	742.593	32.472	36.0393	1.12688	-0.056	2	2	2	2	3	3	1	1	1
1	39	85	1.8	136	76	66	26.2346	89	4.895	5.45643	2.15649	2.71528	1.75847	3.69796	3.10294	1.22634	1.54412	2.10294	4.284	92.82	0.3481	9.04776	237.364	805.251	36.744	51.7557	1.5597	0.09	3	3	3	3	4	4	2	2	2
1	59	67	1.7	135	75	58	23.1834	81	4.565	3.38764	1.25325	1.73261	1.08611	2.30153	3.11905	1.15388	1.59524	2.11905	2.856	98.124	0.3304	8.43522	195.557	683.253	34.879	20.0519	1.42764	0.061	2	3	2	2	2	2	2	2	1
1	59	73	1.63	155	82	68	27.4756	86	7.37	6.07706	3.65812	3.2842	1.11197	4.96509	5.46512	3.28976	2.95349	4.46512	4.998	83.98	0.354	9.98544	274.356	858.748	46.639	76.8206	3.9397	0.517	4	4	4	4	4	4	3	3	3
1	56	72	1.7	159	100	69	24.9135	81	5.39	4.47375	1.32099	2.06879	1.81019	2.66356	2.47143	0.729752	1.14286	1.47143	5.355	99.892	0.4366	8.65399	215.601	700.974	33.691	21.1358	0.868943	-0.137	2	2	3	2	2	2	1	1	0
1	54	67	1.7	140	95	92	23.1834	86	5.94	8.37859	2.11132	6.28394	1.13783	7.24076	7.36364	1.85557	5.52273	6.36364	4.998	87.516	0.3363	9.22009	213.753	792.928	36.746	44.3378	2.43752	0.27	4	4	2	3	3	3	2	2	2
1	55	75	1.71	138	80	78	25.6489	81	6.6	4.42203	3.60167	1.47401	1.29299	3.12904	3.42	2.78553	1.14	2.42	3.927	83.98	0.236	9.85954	252.886	798.622	41.479	57.6267	3.26466	0.446	4	4	4	3	4	4	3	3	3
1	52	74	1.73	124	82	68	24.7252	84	5.06	4.96509	2.43875	2.74114	1.11197	3.85312	4.46512	2.19317	2.46512	3.46512	6.426	91.936	0.3835	9.20392	227.569	773.129	39.394	46.3362	2.71934	0.34	4	4	3	3	4	3	3	3	3
1	53	96	1.8	184	103	68	29.6296	102	7.04	6.9563	1.86293	4.88751	1.21541	5.74088	5.7234	1.53276	4.02128	4.7234	7.14	104.312	0.3068	9.26483	274.513	945.013	46.503	68.9285	2.08465	0.185	4	3	4	4	4	4	2	2	2
1	51	61	1.65	136	82	69	22.4059	81	4.345	6.15464	1.84035	3.69796	1.60331	4.55133	3.83871	1.14785	2.30645	2.83871	4.284	91.052	0.413	8.77005	196.501	710.374	31.338	29.4456	1.44555	0.061	3	3	2	1	3	2	2	2	1
1	51	80	1.68	146	83	66	28.3447	86	5.5	5.30127	1.5468	3.5428	1.06025	4.24101	5	1.4589	3.34146	4	4.641	82.212	0.295	8.832	250.34	759.552	44.416	32.4828	1.71642	0.164	3	3	4	4	3	3	2	2	2
1	51	89	1.8	181	113	73	27.4691	86	5.39	5.97362	3.46618	3.36178	1.03439	4.93923	5.775	3.35093	3.25	4.775	4.284	105.196	0.4071	9.61867	264.216	827.205	46.323	72.7899	4.0135	0.525	4	4	4	4	4	4	3	3	3
1	48	73	1.73	136	87	80	24.3911	86	5.17	4.86165	1.40002	2.84458	1.37057	3.49108	3.54717	1.02149	2.07547	2.54717	3.57	80.444	0.2714	8.67043	211.481	745.657	35.28	29.4005	1.30623	0.009	2	3	2	2	3	3	1	1	1
1	51	67	1.65	143	80	63	24.6097	84	7.425	6.67184	2.75488	4.00828	1.39643	5.27541	4.77778	1.9728	2.87037	3.77778	5.355	94.588	0.2773	9.7093	238.943	815.581	38.511	52.3428	2.45228	0.294	4	4	3	3	4	4	3	3	2
1	51	85	1.65	144	83	77	31.2213	97	12.155	5.89604	1.06131	3.87898	1.52573	4.37031	3.86441	0.695606	2.54237	2.86441	7.14	102.544	0.3186	9.24831	288.744	897.086	48.115	33.9618	0.872328	-0.155	4	2	4	4	3	4	0	0	0
1	48	72	1.61	152	109	88	27.7767	84	5.115	4.83579	1.96455	2.66356	1.26713	3.56866	3.81633	1.55039	2.10204	2.81633	5.712	103.428	0.5546	8.99851	249.949	755.875	42.015	37.3264	1.80234	0.19	3	3	4	4	3	3	2	2	2
1	48	83	1.67	145	82	66	29.7608	91	4.95	4.88751	1.4226	2.66356	1.57745	3.31006	3.09836	0.901837	1.68852	2.09836	5.712	102.544	0.4425	8.64294	257.221	786.508	41.435	36.9877	1.09146	-0.046	2	2	4	3	3	3	1	1	1
1	48	60	1.65	115	76	81	22.0386	81	4.84	5.17197	1.16292	3.72382	0.905094	4.26687	5.71429	1.28486	4.11429	4.71429	5.712	102.544	0.354	8.41892	185.541	681.932	34.909	18.6068	1.63188	0.107	2	3	1	2	2	2	2	2	2
1	53	67	1.69	165	104	56	23.4586	84	4.84	6.15464	1.15163	3.72382	1.91363	4.24101	3.21622	0.601805	1.94595	2.21622	3.927	101.66	0.3304	8.40916	197.267	706.37	30.674	21.881	0.767393	-0.222	2	2	2	1	2	2	0	0	0
1	53	75	1.64	136	84	70	27.8852	91	5.94	4.49961	1.98713	2.14637	1.44815	3.05146	3.10714	1.37218	1.48214	2.10714	5.355	91.052	0.4248	9.15947	255.413	833.512	41.372	51.6653	1.72428	0.137	3	3	4	3	4	4	2	2	2
1	48	56	1.62	140	78	70	21.3382	74	4.84	5.7926	1.14034	3.64624	1.62917	4.16343	3.55556	0.699952	2.2381	2.55556	9.282	92.82	0.4012	8.39931	179.226	621.549	28.968	10.2631	0.82557	-0.155	2	2	1	1	1	1	0	0	0
1	45	70	1.69	123	80	74	24.5089	81	5.225	6.0512	1.5468	3.95656	1.39643	4.65477	4.33333	1.10768	2.83333	3.33333	6.426	102.544	0.4189	8.78071	215.206	711.238	35.576	24.7488	1.33065	0.045	3	3	3	2	2	2	1	1	1
1	51	60	1.67	123	100	78	21.5139	81	4.895	4.65477	2.78875	2.12051	1.26713	3.38764	3.67347	2.20084	1.67347	2.67347	3.57	86.632	0.2891	9.30488	200.184	753.695	33.434	44.6201	2.82966	0.342	4	4	2	2	3	3	3	3	3
1	47	83	1.75	140	87	63	27.102	97	5.995	6.49082	1.28712	4.49961	1.39643	5.09439	4.64815	0.921719	3.22222	3.64815	6.783	99.892	0.3422	8.7344	236.72	847.237	39.438	41.1878	1.25465	-0.036	1	2	3	3	3	4	1	1	1
1	48	75	1.7	168	97	77	25.9516	86	5.5	4.31859	1.41131	2.40497	1.26713	3.05146	3.40816	1.11379	1.89796	2.40816	3.927	91.936	0.354	8.74034	226.825	751.669	38.566	29.6376	1.37703	0.045	3	3	3	3	3	3	1	1	1
1	47	58	1.64	120	80	69	21.5645	76	4.95	5.40471	2.08874	2.99974	1.44815	3.95656	3.73214	1.44235	2.07143	2.73214	5.712	86.632	0.4189	9.02702	194.664	686.053	31.6	22.9762	1.73792	0.158	3	3	2	1	2	2	2	2	2
1	42	82	1.9	179	113	66	22.7147	86	4.895	5.61159	3.98555	2.71528	1.06025	4.55133	5.29268	3.75905	2.56098	4.29268	6.069	104.312	0.59	9.66196	219.468	830.928	38.373	83.6965	4.9908	0.575	4	4	3	3	4	4	3	3	3
1	36	68	1.64	139	93	128	25.2826	81	5.83	7.0856	1.11776	5.50815	1.06025	6.02534	6.68293	1.05424	5.19512	5.68293	4.641	94.588	0.3835	8.56541	216.556	693.798	39.073	17.8842	1.24533	0.021	2	3	3	3	2	2	1	1	1
1	35	73	1.68	103	83	52	25.8645	81	4.345	5.63745	0.767754	3.64624	1.62917	4.00828	3.46032	0.471255	2.2381	2.46032	4.998	98.124	0.6254	7.89581	204.221	639.56	33.833	12.2841	0.549779	-0.328	1	1	2	2	1	1	0	0	0
1	48	62	1.65	133	87	108	22.7732	89	5.225	4.86165	0.609687	3.10318	1.47401	3.38764	3.29825	0.413625	2.10526	2.29825	7.854	99.892	0.3835	7.84971	178.763	698.625	30.959	14.6325	0.567558	-0.387	1	1	1	1	1	2	0	0	0
0	39	68	1.59	138	75	93	26.8977	84	4.62	5.6633	0.970983	3.49108	1.73261	3.9307	3.26866	0.560417	2.01493	2.26866	3.57	65.416	0.2301	8.19202	220.346	688.129	35.426	25.2456	1.01054	-0.252	1	1	3	2	2	2	0	0	1
1	54	95	1.8	146	86	86	29.321	104	4.785	6.72356	1.44518	4.88751	1.16369	5.55987	5.77778	1.2419	4.2	4.77778	7.854	111.384	0.4307	8.62479	252.887	896.978	43.983	56.3622	1.73272	0.093	2	3	4	4	4	4	2	2	2
1	50	72	1.7	159	86	87	24.9135	81	5.005	5.40471	2.10003	3.64624	0.801655	4.60305	6.74194	2.61962	4.54839	5.74194	4.998	76.024	0.3304	9.04346	225.304	732.52	42.84	33.6005	3.11928	0.418	3	4	3	4	3	2	3	3	3
1	51	73	1.72	129	77	89	24.6755	84	5.17	4.91337	5.53235	2.56012	0.827515	4.08585	5.9375	6.6855	3.09375	4.9375	7.497	99.008	0.5251	10.0446	247.854	843.742	46.424	105.115	8.29842	0.825	4	4	4	4	4	4	3	3	3
1	45	65	1.65	114	73	71	23.8751	81	4.84	4.44789	2.48391	1.93949	1.37057	3.07732	3.24528	1.81232	1.41509	2.24528	6.069	90.168	0.3068	9.17782	219.121	743.403	35.976	39.7426	2.20781	0.258	3	4	3	2	3	3	2	2	2
1	52	53	1.62	130	73	72	20.1951	76	5.445	8.30101	1.59196	6.25808	1.31885	6.98216	6.29412	1.20708	4.7451	5.29412	7.854	124.644	0.5074	8.85073	178.741	672.656	29.931	17.5116	1.50266	0.083	3	3	1	1	1	1	2	2	2
1	55	60	1.66	137	84	76	21.7738	84	7.37	5.6633	5.91622	2.767	1.26713	4.39617	4.46939	4.66899	2.18367	3.46939	6.426	75.14	0.295	10.4662	227.889	879.159	37.336	112.408	6.18759	0.669	4	4	3	3	4	4	3	3	3
1	48	65	1.67	160	100	100	23.3067	79	4.235	5.68916	4.47104	2.66356	0.982674	4.70649	5.78947	4.54987	2.71053	4.78947	4.998	90.168	0.4012	9.63207	224.492	760.934	40.435	62.5946	5.4751	0.658	4	4	3	3	4	3	3	3	3
1	37	88	1.68	125	99	72	31.1791	89	6.215	7.0856	2.80005	4.62891	1.16369	5.9219	6.08889	2.40617	3.97778	5.08889	6.069	87.516	0.2891	9.54767	297.688	849.743	50.466	67.2011	2.77084	0.382	4	4	4	4	4	4	3	3	3
1	45	70	1.65	154	78	82	25.7117	81	5.775	4.93923	0.632268	3.5428	1.11197	3.82726	4.44186	0.5686	3.18605	3.44186	5.355	106.964	0.2773	7.98616	205.338	646.879	38.166	10.1163	0.665511	-0.244	1	1	2	3	1	1	0	0	0
1	49	52	1.65	147	76	67	19.1001	74	4.125	4.88751	1.15163	2.66356	1.70675	3.18076	2.86364	0.674751	1.56061	1.86364	4.284	105.196	0.472	8.24931	157.563	610.449	25.208	10.3647	0.840148	-0.174	1	2	1	1	1	1	0	0	0
1	49	69	1.65	162	108	99	25.3444	81	6.105	7.00802	1.97584	4.93923	1.16369	5.84432	6.02222	1.6979	4.24444	5.02222	4.284	98.124	0.5192	9.18117	232.691	743.675	39.834	31.6134	2.003	0.23	3	4	3	3	3	3	2	2	2
1	52	83	1.75	151	102	82	27.102	84	4.84	4.60305	1.02744	2.37911	1.75847	2.84458	2.61765	0.584279	1.35294	1.61765	4.998	90.168	0.4602	8.29505	224.813	696.784	35.884	19.5213	0.688736	-0.237	1	1	3	2	2	2	0	0	0
1	60	79	1.72	179	110	82	26.7036	86	5.28	4.47375	2.66456	2.27567	0.982674	3.49108	4.55263	2.71154	2.31579	3.55263	4.284	75.14	0.3599	9.33503	249.279	802.813	44.474	55.9557	3.29968	0.433	4	4	4	4	4	4	3	3	3
1	53	74	1.67	119	87	55	26.5338	84	4.84	7.37005	2.08874	5.19783	1.13783	6.23222	6.47727	1.83572	4.56818	5.47727	7.14	107.848	0.5133	9.00455	238.924	756.382	41.285	39.6861	2.18972	0.265	3	4	3	3	3	3	2	2	2
1	59	87	1.76	125	88	71	28.0863	89	5.005	5.24955	1.0726	3.10318	1.65503	3.59452	3.17188	0.648084	1.875	2.17188	5.712	75.14	0.4779	8.37159	235.127	745.071	37.986	25.7424	0.793227	-0.187	2	2	3	3	2	3	0	0	0
1	59	71	1.72	114	75	80	23.9995	84	4.235	6.87872	3.94039	3.9307	1.13783	5.74088	6.04545	3.46306	3.45455	5.04545	6.069	85.748	0.3776	9.50573	228.132	798.481	39.452	74.8673	4.36298	0.539	4	4	3	3	4	4	3	3	3
1	58	61	1.66	133	74	69	22.1367	81	5.115	5.19783	1.01615	3.31006	1.42229	3.77554	3.65455	0.714443	2.32727	2.65455	6.426	114.92	0.3717	8.33926	184.604	675.48	31.052	16.2583	0.90534	-0.149	1	2	1	1	1	1	1	1	0
1	57	64	1.75	110	71	106	20.898	81	4.125	7.42177	4.26781	4.49961	0.956814	6.46496	7.75676	4.46044	4.7027	6.75676	4.641	97.24	0.4071	9.55924	199.769	774.298	36.286	68.285	5.81895	0.649	4	4	2	2	4	3	3	3	3
1	56	72	1.8	123	76	84	22.2222	84	4.235	6.77528	5.28396	4.26687	1.03439	5.74088	6.55	5.10826	4.125	5.55	5.355	81.328	0.4071	9.79913	217.758	823.127	38.749	100.395	6.69968	0.708	4	4	3	3	4	4	3	3	3
1	55	60	1.61	127	74	75	23.1473	76	4.345	3.56866	1.67099	1.83605	0.956814	2.61184	3.72973	1.74642	1.91892	2.72973	3.57	91.052	0.354	8.67351	200.768	659.187	36.695	18.3809	2.02903	0.243	2	4	2	1	2	1	2	2	2
1	54	80	1.64	162	88	88	29.7442	81	5.885	5.17197	1.19679	3.51694	1.11197	4.05999	4.65116	1.07628	3.16279	3.65116	4.641	98.124	0.3186	8.64312	257.083	700.093	45.61	19.1487	1.15982	0.033	2	3	4	4	2	2	1	1	1
1	54	60	1.61	164	87	69	23.1473	84	5.775	6.85286	1.99842	4.08585	1.86191	4.99095	3.68056	1.07332	2.19444	2.68056	8.211	77.792	0.4307	9.13696	211.496	767.505	32.254	37.97	1.37827	0.029	3	3	2	2	3	3	1	1	1
1	49	64	1.68	120	74	72	22.6757	81	4.565	6.62012	1.35486	4.68063	1.31885	5.30127	5.01961	1.0273	3.54902	4.01961	4.998	93.704	0.295	8.51319	193.043	689.568	32.626	21.6778	1.28577	0.013	2	3	2	2	2	2	1	1	1
1	52	78	1.73	135	86	53	26.0617	86	4.565	6.23222	1.05002	3.77554	1.96535	4.26687	3.17105	0.534265	1.92105	2.17105	6.783	102.544	0.3953	8.25829	215.225	710.213	33.438	22.0504	0.658997	-0.276	1	1	3	2	2	2	0	0	0
1	51	76	1.65	132	70	52	27.9155	86	5.005	4.91337	1.8968	2.71528	1.31885	3.59452	3.72549	1.43822	2.05882	2.72549	4.641	100.776	0.3422	8.94168	249.612	768.984	41.597	39.8329	1.70691	0.158	3	3	4	3	3	3	2	2	2
1	51	83	1.78	147	71	81	26.1962	91	7.92	5.06853	0.914531	3.64624	1.00853	4.05999	5.02564	0.906793	3.61538	4.02564	4.284	95.472	0.3481	8.67112	227.15	789.071	42.271	23.7778	1.18016	-0.041	2	2	3	4	2	3	1	1	1
1	48	69	1.65	125	95	66	25.3444	81	5.335	4.49961	2.26939	2.5084	0.956814	3.5428	4.7027	2.37182	2.62162	3.7027	6.069	89.284	0.4307	9.18487	232.785	743.974	41.957	36.3103	2.79802	0.375	3	4	3	4	3	3	3	3	3
1	49	76	1.74	140	79	63	25.1024	81	4.125	7.31833	0.779045	4.91337	2.04293	5.27541	3.58228	0.381338	2.40506	2.58228	4.641	84.864	0.3658	7.85845	197.266	636.534	30.957	12.4647	0.452216	-0.42	1	1	2	1	1	1	0	0	0
1	52	90	1.86	165	107	94	26.0146	91	4.4	6.25808	1.46777	4.21515	1.37057	4.88751	4.56604	1.07092	3.07547	3.56604	6.783	73.372	0.3894	8.55641	222.591	778.634	37.144	38.1619	1.39913	0.029	2	3	3	3	3	3	1	1	1
1	47	90	1.75	127	78	68	29.3878	81	5.225	5.19783	2.45004	3.25834	0.827515	4.37031	6.28125	2.96072	3.9375	5.28125	3.927	95.472	0.4366	9.24063	271.561	748.491	50.973	39.2006	3.21305	0.471	4	4	4	4	3	3	3	3	3
1	49	77	1.63	187	103	76	28.9811	86	6.6	5.19783	6.22107	2.66356	0.853375	4.34445	6.09091	7.28996	3.12121	5.09091	4.641	76.908	0.3422	10.4061	301.58	894.923	55.31	130.642	8.46779	0.863	4	4	4	4	4	4	3	3	3
1	46	69	1.76	124	91	79	22.2753	81	11.22	7.0856	10.5228	3.62038	0.801655	6.28394	8.83871	13.1263	4.51613	7.83871	5.712	70.72	0.2124	11.4623	255.326	928.447	46.717	168.364	16.5805	1.118	4	4	4	4	4	4	3	3	3
1	50	86	1.75	107	71	90	28.0816	81	4.95	4.83579	4.15491	1.29299	1.62917	3.20662	2.96825	2.55032	0.793651	1.96825	6.069	79.56	0.3894	9.71475	272.806	786.894	42.741	66.4785	2.84117	0.407	4	4	4	4	4	3	3	3	3
1	42	73	1.68	127	71	74	25.8645	86	4.4	6.41324	1.35486	4.00828	1.78433	4.62891	3.5942	0.759311	2.24638	2.5942	3.927	76.908	0.354	8.47637	219.237	728.968	34.415	28.4521	0.940515	-0.119	2	2	3	2	3	2	1	1	1
1	48	74	1.62	147	109	69	28.1969	86	5.885	6.25808	3.87264	3.38764	1.08611	5.17197	5.7619	3.5656	3.11905	4.7619	6.069	96.356	0.4897	9.81741	276.821	844.297	47.703	81.3255	4.20757	0.553	4	4	4	4	4	4	3	3	3
1	39	80	1.75	131	98	100	26.1224	89	4.62	7.49935	6.08558	4.99095	0.853375	6.64598	8.78788	7.1312	5.84848	7.78788	7.14	92.82	0.4779	10.0274	261.94	892.437	49.013	146.054	9.0912	0.853	4	4	4	4	4	4	3	3	3
1	39	85	1.67	136	88	76	30.478	86	6.545	6.74942	3.11618	4.13757	1.18955	5.55987	5.67391	2.61962	3.47826	4.67391	5.712	99.892	0.5723	9.70638	295.831	834.748	49.695	65.4398	2.95458	0.418	4	4	4	4	4	4	3	3	3
1	39	69	1.66	140	85	55	25.0399	81	5.005	5.43057	1.21937	2.79286	2.06879	3.36178	2.625	0.589415	1.35	1.625	5.355	114.036	0.3894	8.49984	212.835	688.487	32.399	19.51	0.699916	-0.229	2	2	2	2	2	2	0	0	0
1	36	63	1.72	139	84	92	21.2953	81	4.62	5.58573	3.08231	3.0256	1.13783	4.44789	4.90909	2.70893	2.65909	3.90909	4.641	97.24	0.4425	9.34714	199.05	757.118	34.273	49.3169	3.50087	0.433	4	4	2	2	4	3	3	3	3
1	52	57	1.6	137	77	84	22.2656	76	4.95	5.71502	1.93068	3.1549	1.68089	4.03413	3.4	1.1486	1.87692	2.4	3.213	83.096	0.413	8.94833	199.24	680.073	31.267	21.2374	1.3616	0.061	3	3	2	1	2	2	2	2	1
1	35	60	1.67	132	82	85	21.5139	79	4.125	4.26687	1.51293	2.04293	1.52573	2.74114	2.79661	0.991609	1.33898	1.79661	4.284	107.848	0.3304	8.52218	183.345	673.252	29.8	21.181	1.24345	-0.004	2	3	1	1	2	1	1	1	1
1	36	63	1.73	119	74	83	21.0498	84	4.07	4.99095	5.34041	2.61184	0.879235	4.11171	5.67647	6.07393	2.97059	4.67647	6.069	94.588	0.4307	9.77001	205.657	820.681	38.391	101.468	8.18774	0.783	4	4	2	3	4	4	3	3	3
0	36	72	1.5	154	88	99	32	91	5.225	4.80993	1.00485	3.0256	1.31885	3.49108	3.64706	0.761916	2.29412	2.64706	4.284	60.112	0.3068	8.34937	267.18	759.792	45.831	33.1602	1.3405	-0.119	1	2	4	4	3	3	1	1	1
1	53	79	1.79	136	93	90	24.6559	91	5.39	5.35299	3.27425	2.30153	1.55159	3.8014	3.45	2.11025	1.48333	2.45	5.355	98.124	0.472	9.5617	235.752	870.115	37.259	85.1304	2.83886	0.324	4	4	3	3	4	4	3	3	3
1	44	67	1.7	130	92	86	23.1834	81	4.235	4.03413	1.62583	1.52573	1.75847	2.27567	2.29412	0.924573	0.867647	1.29412	5.355	85.748	0.4012	8.62047	199.852	698.258	31.297	26.0133	1.14393	-0.036	2	2	2	1	2	2	1	1	1
1	49	60	1.69	125	72	63	21.0077	79	4.95	4.11171	0.519363	2.58598	1.29299	2.81872	3.18	0.401676	2	2.18	5.712	80.444	0.2832	7.6353	160.4	603.189	29.112	7.27109	0.509743	-0.398	1	1	1	1	1	1	0	0	0
1	50	74	1.74	222	130	81	24.4418	81	6.545	5.35299	2.08874	2.37911	2.01707	3.33592	2.65385	1.03553	1.17949	1.65385	3.927	105.196	0.4602	9.30633	227.464	753.813	33.924	33.4199	1.24582	0.017	4	3	3	2	3	3	1	1	1
1	43	85	1.67	157	110	75	30.478	89	4.95	6.51668	3.3307	4.03413	0.956814	5.55987	6.81081	3.48103	4.21622	5.81081	7.14	79.56	0.3422	9.49364	289.347	844.934	52.025	79.9368	4.06309	0.542	4	4	4	4	4	4	3	3	3
1	50	69	1.72	101	66	68	23.3234	84	5.445	7.13732	0.993564	4.83579	1.83605	5.30127	3.88732	0.541143	2.6338	2.88732	5.712	105.196	0.3245	8.37931	195.434	703.862	30.942	18.8777	0.692138	-0.268	2	1	2	1	2	2	0	0	0
1	51	70	1.7	143	98	76	24.2215	81	3.96	4.18929	2.06616	1.91363	1.31885	2.87044	3.17647	1.56664	1.45098	2.17647	5.355	103.428	0.3481	8.79301	212.979	712.233	35.666	33.0586	1.89393	0.196	3	3	2	2	3	2	2	2	2
1	57	81	1.75	133	78	76	26.449	86	16.28	4.60305	0.914531	3.1549	1.03439	3.56866	4.45	0.884123	3.05	3.45	4.284	70.72	0.2891	9.39166	248.4	807.683	46.691	19.2051	1.08165	-0.056	4	2	4	4	2	4	1	1	1
1	38	83	1.72	130	80	74	28.0557	86	5.28	5.40471	2.05487	3.38764	1.08611	4.31859	4.97619	1.89195	3.11905	3.97619	3.213	88.4	0.3658	9.07521	254.611	780.468	44.475	43.1523	2.239	0.276	3	4	4	4	3	3	2	2	2
1	42	67	1.65	100	80	68	24.6097	84	5.115	5.35299	1.76132	3.2842	1.26713	4.08585	4.22449	1.39	2.59184	3.22449	4.998	98.124	0.354	8.88931	218.764	746.702	36.897	33.4651	1.72783	0.143	3	3	3	3	3	3	2	2	2
1	42	82	1.72	136	94	92	27.7177	89	3.85	5.7926	1.80648	3.72382	1.24127	4.55133	4.66667	1.45535	3	3.66667	4.998	102.544	0.4661	8.63052	239.218	768.116	40.842	43.3555	1.79473	0.164	2	3	3	3	3	3	2	2	2
1	55	68	1.7	148	90	76	23.5294	79	5.555	5.94776	1.29841	4.03413	1.31885	4.62891	4.5098	0.984499	3.05882	3.5098	5.712	88.4	0.3422	8.66691	203.927	684.686	34.464	18.1777	1.17879	-0.009	2	3	2	2	2	2	1	1	1
1	55	81	1.75	136	93	68	26.449	91	5.225	5.43057	0.937112	3.51694	1.47401	3.95656	3.68421	0.635756	2.38596	2.68421	5.355	102.544	0.4602	8.27957	218.986	753.441	36.698	24.3649	0.823017	-0.194	1	2	3	1	2	3	0	0	0
1	50	85	1.76	120	80	76	27.4406	86	4.62	5.55987	1.97584	3.49108	1.16369	4.39617	4.77778	1.6979	3	3.77778	3.927	92.82	0.4661	8.90246	244.289	765.611	42.081	41.4926	2.03482	0.23	3	4	4	4	3	3	2	2	2
1	47	63	1.68	108	75	61	22.3214	81	4.785	6.0512	1.23067	3.95656	1.52573	4.52547	3.9661	0.806607	2.59322	2.9661	3.927	106.08	0.2419	8.46411	188.931	685.593	30.903	19.6906	1.01778	-0.092	2	2	1	1	2	2	1	1	1
1	42	62	1.68	118	78	88	21.9671	80	4.565	6.5684	1.14034	4.29273	1.75847	4.80993	3.73529	0.648485	2.44118	2.73529	3.927	91.052	0.3363	8.34081	183.224	667.265	29.092	17.1051	0.814809	-0.187	1	2	1	1	1	1	0	0	0
1	45	70	1.71	140	90	90	23.939	81	5.94	5.84432	0.89195	3.8014	1.62917	4.21515	3.5873	0.547487	2.33333	2.5873	6.069	90.168	0.3422	8.35843	200.092	677.033	32.861	14.2712	0.666017	-0.26	2	1	2	2	1	1	0	0	0
0	46	71	1.62	104	78	74	27.0538	86	5.665	6.07706	0.790335	4.13757	1.57745	4.49961	3.85246	0.501021	2.62295	2.85246	5.712	67.184	0.3304	8.19008	221.573	704.347	36.983	22.1294	0.921839	-0.301	1	1	3	3	2	2	0	0	0
1	38	65	1.65	140	85	87	23.8751	81	5.94	7.05974	3.16134	4.44789	1.16369	5.89604	6.06667	2.71665	3.82222	5.06667	5.355	105.196	0.3717	9.62377	229.769	779.526	38.935	50.5815	3.30948	0.435	4	4	3	3	4	3	3	3	3
1	50	81	1.75	149	91	75	26.449	91	5.06	5.55987	2.74359	3.4135	0.879235	4.68063	6.32353	3.12043	3.88235	5.32353	4.998	103.428	0.295	9.3217	246.55	848.275	45.43	71.3334	4.03955	0.494	4	4	4	4	4	4	3	3	3
1	39	75	1.7	139	80	90	25.9516	84	5.61	5.74088	2.00971	3.87898	0.930954	4.80993	6.16667	2.15876	4.16667	5.16667	4.284	94.588	0.4307	9.11361	236.512	765.543	43.054	38.1845	2.60692	0.334	3	4	3	4	3	3	3	3	3
1	51	59	1.63	126	76	84	22.2063	81	5.17	7.83553	1.51293	5.84432	1.29299	6.54254	6.06	1.1701	4.52	5.06	5.712	95.472	0.236	8.74799	194.261	708.587	32.784	24.2068	1.48036	0.068	3	3	2	2	2	2	2	2	2
1	58	78	1.72	144	95	68	26.3656	86	4.84	6.74942	1.68229	4.73235	1.24127	5.50815	5.4375	1.35529	3.8125	4.4375	5.712	80.444	0.4248	8.78814	231.705	755.78	39.398	35.328	1.661	0.134	3	3	3	3	3	3	2	2	2
1	53	86	1.86	130	90	60	24.8584	97	5.115	7.03388	0.722592	4.44789	2.24981	4.78407	3.12644	0.32118	1.97701	2.12644	5.712	106.08	0.4366	7.99834	198.826	775.839	30.736	23.123	0.458534	-0.495	1	1	2	1	2	3	0	0	0
0	58	46	1.63	140	90	72	17.3134	71	4.565	7.00802	1.01615	4.52547	2.01707	4.99095	3.47436	0.503774	2.24359	2.47436	3.927	75.14	0.3363	8.2255	142.412	584.011	22.032	13.2099	0.968511	-0.301	1	1	1	1	1	1	0	0	1
1	49	79	1.7	137	80	90	27.3356	86	17.325	7.52521	2.91295	5.14611	1.03439	6.49082	7.275	2.81609	4.975	6.275	3.57	74.256	0.2183	10.6124	290.096	912.665	50.316	61.172	3.3822	0.45	4	4	4	4	4	4	3	3	3
1	60	65	1.75	137	72	70	21.2245	88	5.775	4.78407	1.29841	2.94802	1.24127	3.5428	3.85417	1.04603	2.375	2.85417	4.998	80.444	0.2537	8.70575	184.775	766.106	31.704	29.8634	1.47111	0.021	2	3	1	1	3	3	1	1	1
1	60	69	1.75	150	80	60	22.5306	86	5.39	4.55133	2.13391	2.24981	1.31885	3.23248	3.45098	1.618	1.70588	2.45098	4.284	94.588	0.3009	9.13357	205.785	785.487	34.113	44.812	2.15724	0.21	3	3	2	2	3	3	2	2	2
1	51	70	1.68	121	78	76	24.8016	85	4.565	6.20636	1.34357	4.11171	1.47401	4.73235	4.21053	0.911506	2.78947	3.21053	6.426	91.052	0.4779	8.50482	210.933	722.909	34.672	26.8714	1.14174	-0.041	2	2	2	2	2	2	1	1	1
1	60	53	1.67	114	70	80	19.0039	86	14.3	5.14611	2.91295	2.45668	1.34471	3.8014	3.82692	2.16623	1.82692	2.82692	4.641	83.98	0.3658	10.4205	198.03	896.162	32.01	61.172	3.14212	0.336	4	4	2	1	4	4	3	3	3
1	47	72	1.74	140	90	67	23.7812	79	5.28	6.90458	1.24196	4.70649	1.62917	5.27541	4.2381	0.762324	2.88889	3.2381	6.069	90.168	0.4484	8.57168	203.845	677.163	32.776	17.3874	0.907646	-0.119	2	2	2	2	1	1	1	1	0
1	58	98	1.78	138	92	78	30.9304	99	11.77	4.96509	3.47748	2.53426	0.827515	4.13757	6	4.20231	3.0625	5	3.57	70.72	0.295	10.4029	321.767	1029.89	58.913	118.234	5.40865	0.623	4	4	4	4	4	4	3	3	3
1	59	65	1.7	157	92	50	22.4913	86	7.645	3.36178	1.86293	1.49987	1.00853	2.35325	3.33333	1.84717	1.48718	2.33333	6.069	97.24	0.3363	9.34727	210.233	803.865	37.407	39.1216	2.465	0.267	4	4	2	3	3	4	2	2	2
1	59	71	1.66	140	90	74	25.7657	86	7.095	4.26687	1.08389	2.27567	1.49987	2.767	2.84483	0.722655	1.51724	1.84483	4.998	106.08	0.4366	8.73101	224.961	750.867	37.25	22.7617	0.896997	-0.143	2	2	3	3	2	3	1	1	0
1	59	71	1.62	128	78	74	27.0538	86	5.005	6.93044	0.733883	4.99095	1.60331	5.32713	4.32258	0.45773	3.1129	3.32258	6.426	87.516	0.4012	7.9921	216.217	687.321	36.11	15.4115	0.552963	-0.337	1	1	3	2	1	2	0	0	0
1	44	78	1.75	128	81	61	25.4694	86	5.17	6.38738	1.25325	4.42203	1.39643	4.99095	4.57407	0.897463	3.16667	3.57407	8.211	106.08	0.4307	8.55968	218.01	736.132	36.398	26.3182	1.12107	-0.046	2	2	3	2	2	3	1	1	1
1	58	72	1.7	160	100	70	24.9135	86	4.29	5.53401	0.925821	3.33592	1.78433	3.74968	3.10145	0.518863	1.86957	2.10145	5.355	105.196	0.3304	8.07028	201.059	694.044	32.194	19.4422	0.655966	-0.284	1	1	2	2	2	2	0	0	0
1	58	91	1.72	160	100	80	30.7599	112	9.405	5.17197	5.18234	2.43082	1.29299	3.87898	4	4.00802	1.88	3	6.426	106.08	0.5074	10.5776	325.365	1184.69	52.571	243.57	5.85517	0.603	4	4	4	4	4	4	3	3	3
1	58	82	1.75	132	87	76	26.7755	86	4.895	4.78407	0.846788	3.31006	1.08611	3.69796	4.40476	0.77965	3.04762	3.40476	4.641	93.704	0.2537	8.11298	217.229	697.716	39.646	17.7825	0.947333	-0.108	1	2	3	3	2	2	1	1	1
1	58	68	1.65	162	92	65	24.977	86	5.72	6.5684	1.5468	4.75821	1.11197	5.45643	5.90698	1.39104	4.27907	4.90698	5.712	100.776	0.4897	8.87122	221.577	762.925	38.81	32.4828	1.75618	0.143	3	3	3	3	3	3	2	2	2
1	58	80	1.69	142	94	100	28.0102	91	7.315	4.65477	2.50649	2.04293	1.47401	3.18076	3.15789	1.70046	1.38596	2.15789	4.284	85.748	0.295	9.59988	268.895	873.589	42.886	65.1688	2.13135	0.23	4	4	4	4	4	4	2	2	2
1	57	72	1.68	165	91	107	25.5102	91	5.39	5.40471	0.745173	3.72382	1.34471	4.05999	4.01923	0.554151	2.76923	3.01923	4.284	98.124	0.3481	8.08148	206.16	735.414	35.95	19.3745	0.731822	-0.26	1	1	2	2	2	3	0	0	0
1	58	75	1.72	160	80	90	25.3515	86	4.07	6.6977	2.72101	3.69796	1.75847	4.93923	3.80882	1.54738	2.10294	2.80882	4.284	89.284	0.4543	9.09571	230.59	782.231	35.828	57.1412	1.93781	0.19	3	3	3	2	4	3	2	2	2
1	56	72	1.7	140	80	90	24.9135	81	9.515	2.99974	1.7839	1.03439	1.13783	1.86191	2.63636	1.5678	0.909091	1.63636	5.712	91.052	0.2832	9.52274	237.245	771.342	40.961	28.5424	1.86684	0.196	4	3	3	3	3	3	2	2	2
1	56	75	1.7	130	100	86	25.9516	97	7.37	4.73235	4.56136	2.14637	1.26713	3.46522	3.73469	3.59975	1.69388	2.73469	3.213	98.124	0.2124	10.2061	264.864	989.992	43.409	145.964	5.01982	0.556	4	4	4	4	4	4	3	3	3
1	56	75	1.7	168	96	74	25.9516	84	4.73	5.74088	1.19679	3.43936	1.75847	3.98242	3.26471	0.680588	1.95588	2.26471	4.284	105.196	0.354	8.42464	218.633	707.67	34.61	22.7391	0.821877	-0.167	2	2	3	2	2	2	0	0	0
1	55	58	1.76	134	80	74	18.7242	74	7.645	5.84432	0.937112	4.08585	1.31885	4.52547	4.43137	0.710551	3.09804	3.43137	5.355	106.08	0.4248	8.66017	162.154	640.852	28.038	8.43401	0.893073	-0.149	2	2	1	1	1	1	1	1	0
1	56	81	1.68	108	86	73	28.699	86	7.425	6.25808	2.28068	4.03413	1.18955	5.06853	5.26087	1.91726	3.3913	4.26087	3.927	85.748	0.3717	9.5204	273.226	818.754	46.154	47.8943	2.23965	0.283	4	4	4	4	4	4	2	2	2
1	56	52	1.68	120	80	74	18.424	71	4.675	4.52547	0.835497	2.71528	1.42229	3.10318	3.18182	0.587431	1.90909	2.18182	4.284	83.096	0.2891	8.05357	148.379	571.803	25.268	5.01298	0.713772	-0.229	1	0	1	1	1	1	0	0	0
1	56	70	1.7	142	88	71	24.2215	84	6.655	4.55133	1.27583	2.58598	1.37057	3.18076	3.32075	0.930872	1.88679	2.32075	3.927	92.82	0.4189	8.83003	213.876	741.723	35.822	24.2407	1.16703	-0.032	3	2	2	2	2	3	1	1	1
1	55	70	1.65	150	90	60	25.7117	86	4.565	5.04267	0.598397	2.92216	1.83605	3.20662	2.74648	0.325916	1.59155	1.74648	6.426	106.08	0.3953	7.69599	197.877	661.855	32.504	12.5663	0.405011	-0.481	1	1	2	2	1	1	0	0	0
1	55	65	1.64	130	90	60	24.1672	89	5.665	5.63745	0.937112	3.72382	1.47401	4.16343	3.82456	0.635756	2.52632	2.82456	4.998	102.544	0.3894	8.36042	202.048	744.078	33.875	22.4907	0.845498	-0.194	2	2	2	2	2	3	0	0	0
1	55	64	1.66	147	90	82	23.2254	84	8.03	5.7926	4.57265	3.25834	1.34471	4.44789	4.30769	3.40047	2.42308	3.30769	6.783	99.892	0.4366	10.2943	239.091	864.725	38.49	86.8804	4.35892	0.531	4	4	3	3	4	4	3	3	3
1	54	73	1.73	154	95	81	24.3911	86	5.005	4.11171	2.05487	2.27567	0.905094	3.20662	4.54286	2.27034	2.51429	3.54286	5.712	84.864	0.3953	9.02172	220.049	775.868	40.455	43.1523	2.90321	0.356	3	4	3	3	3	3	3	3	3
1	54	64	1.62	150	90	70	24.3865	81	5.005	5.6633	2.3823	3.25834	1.31885	4.34445	4.29412	1.80634	2.47059	3.29412	4.998	101.66	0.3835	9.16957	223.614	742.735	37.057	38.1167	2.17579	0.258	3	4	3	3	3	3	2	2	2
1	55	72	1.69	161	96	63	25.2092	86	4.675	5.12025	1.64841	2.61184	1.75847	3.36178	2.91176	0.937414	1.48529	1.91176	3.927	88.4	0.354	8.73311	220.155	751.048	34.388	34.6167	1.17755	-0.027	2	2	3	2	3	3	1	1	1
1	55	70	1.7	126	82	66	24.2215	84	4.95	5.06853	1.43389	3.05146	1.37057	3.69796	3.69811	1.0462	2.22642	2.69811	6.069	104.312	0.3835	8.65085	209.536	726.671	34.936	27.244	1.31161	0.021	2	3	2	2	2	2	1	1	1
1	55	73	1.75	160	90	64	23.8367	86	5.445	3.8014	0.779045	2.06879	1.37057	2.43082	2.77358	0.568409	1.50943	1.77358	4.641	99.008	0.472	8.13608	193.938	699.703	33.549	16.3599	0.735821	-0.244	1	1	2	2	1	2	0	0	0
1	55	69	1.69	130	80	70	24.1588	86	7.81	7.44763	7.14689	4.55133	1.00853	6.4391	7.38462	7.08642	4.51282	6.38462	4.998	76.908	0.2419	10.7132	258.817	921.331	44.983	150.085	9.10829	0.851	4	4	4	4	4	4	3	3	3
1	55	67	1.6	136	76	99	26.1719	86	4.785	4.91337	1.46777	2.8963	1.34471	3.56866	3.65385	1.09151	2.15385	2.65385	7.14	80.444	0.3127	8.6403	226.133	743.065	37.865	30.8231	1.3432	0.037	2	3	3	3	3	3	1	1	1
1	55	69	1.65	160	90	76	25.3444	81	5.665	6.15464	0.846788	4.60305	1.16369	4.99095	5.28889	0.727673	3.95556	4.28889	4.641	98.124	0.3835	8.25907	209.321	668.985	37.533	13.5486	0.85843	-0.137	1	2	2	3	1	1	1	1	0
1	54	77	1.7	150	97	68	26.6436	81	5.17	5.89604	1.21937	4.11171	1.21541	4.68063	4.85106	1.00326	3.38298	3.85106	7.14	101.66	0.4956	8.53228	227.331	691.115	39.373	19.51	1.15133	0	2	3	3	3	2	2	1	1	1
1	54	76	1.7	140	90	90	26.2976	91	4.675	3.8014	2.46133	1.75847	0.905094	2.8963	4.2	2.71942	1.94286	3.2	4.641	99.892	0.3186	9.134	240.202	831.194	44.095	63.9946	3.53166	0.435	3	4	4	4	4	4	3	3	3
1	54	65	1.65	140	100	80	23.8751	97	4.785	5.24955	1.53551	2.99974	1.55159	3.69796	3.38333	0.989635	1.93333	2.38333	4.998	87.516	0.3599	8.68542	207.365	842.485	33.458	49.1363	1.44374	-0.004	2	3	2	2	4	4	1	1	1
1	54	61	1.74	126	80	72	20.148	79	5.335	5.76674	1.02744	3.43936	1.86191	3.90484	3.09722	0.551819	1.84722	2.09722	4.284	91.936	0.2891	8.39242	169.09	663.001	26.632	14.3841	0.714875	-0.26	2	1	1	1	1	1	0	0	0
1	55	97	1.76	160	90	60	31.3146	102	4.51	4.83579	1.94197	2.68942	1.26713	3.56866	3.81633	1.53257	2.12245	2.81633	4.641	100.776	0.4425	8.86107	277.48	903.829	46.799	71.8528	2.0174	0.185	3	3	4	4	4	4	2	2	2
1	54	56	1.68	130	90	60	19.8413	79	4.73	5.37885	1.70487	3.05146	1.55159	3.82726	3.46667	1.09879	1.96667	2.46667	5.712	102.544	0.4838	8.77848	174.176	693.5	27.997	23.8681	1.43413	0.041	3	3	1	1	2	2	1	1	1
1	50	60	1.65	134	84	67	22.0386	79	4.73	5.45643	1.17421	2.92216	1.99121	3.46522	2.74026	0.589699	1.46753	1.74026	3.57	93.704	0.3068	8.40559	185.247	664.042	28.517	16.439	0.730472	-0.229	2	2	1	1	1	1	0	0	0
1	46	66	1.68	125	89	104	23.3844	81	10.065	5.19783	3.28554	2.56012	1.13783	4.05999	4.56818	2.88754	2.25	3.56818	4.998	95.472	0.3835	10.1897	238.279	825.363	40.083	52.5686	3.55647	0.461	4	4	3	3	4	4	3	3	3
1	53	80	1.75	142	87	74	26.1224	86	5.06	7.96483	2.45004	5.63745	1.21541	6.74942	6.55319	2.01581	4.6383	5.55319	4.641	96.356	0.2773	9.20854	240.55	791.934	40.664	51.4508	2.48323	0.305	4	4	4	3	4	3	3	3	3
1	48	78	1.7	132	90	67	26.9896	91	5.39	5.45643	1.28712	3.2842	1.57745	3.87898	3.45902	0.815948	2.08197	2.45902	3.213	88.4	0.4543	8.62802	232.867	785.15	37.664	33.4651	1.04441	-0.086	2	2	3	3	3	3	1	1	1
1	50	77	1.67	136	95	64	27.6095	84	4.73	7.11146	1.72745	5.06853	1.24127	5.87018	5.72917	1.39167	4.08333	4.72917	6.783	95.472	0.4248	8.79164	242.732	738.498	41.251	32.8215	1.62339	0.143	3	3	4	3	3	3	2	2	2
1	47	67	1.68	117	85	94	23.7387	79	4.73	9.25782	6.09687	6.36152	1.24127	8.01655	7.45833	4.91179	5.125	6.45833	3.213	83.096	0.413	10.0528	238.639	794.169	40.278	85.3562	5.85368	0.691	4	4	3	3	4	3	3	3	3
1	44	63	1.71	140	80	62	21.5451	81	5.61	5.87018	1.76132	3.95656	1.11197	4.75821	5.27907	1.58396	3.55814	4.27907	6.069	79.56	0.354	8.98168	193.511	727.516	33.725	28.1811	2.03503	0.199	3	3	2	2	2	2	2	2	2
1	48	78	1.6	132	88	79	30.4687	86	4.235	4.55133	1.88551	2.48254	1.21541	3.33592	3.74468	1.55134	2.04255	2.74468	4.998	106.08	0.3127	8.76865	267.17	754.104	45.675	39.5958	1.75001	0.19	3	3	4	4	3	3	2	2	2
1	49	68	1.69	124	85	77	23.8087	84	8.25	3.72382	1.63712	1.93949	1.03439	2.68942	3.6	1.58269	1.875	2.6	4.284	88.4	0.3363	9.29422	221.283	780.715	39.36	31.1053	2.00244	0.199	4	3	3	3	3	3	2	2	2
0	49	79	1.67	132	86	83	28.3266	117	4.895	5.99948	2.26939	3.85312	1.11197	4.88751	5.39535	2.04087	3.46512	4.39535	3.213	63.648	0.2301	9.09879	257.738	1064.56	44.723	133.894	4.97224	0.31	3	4	4	4	4	4	3	3	3
1	49	54	1.63	132	84	90	20.3244	74	4.29	5.94776	2.45004	3.1549	1.68089	4.26687	3.53846	1.45759	1.87692	2.53846	3.57	86.632	0.4012	9.04346	183.803	669.216	28.825	22.0504	1.76124	0.164	3	3	1	1	2	1	2	2	2
1	50	70	1.67	125	85	79	25.0995	86	5.17	5.50815	2.3823	3.38764	1.03439	4.47375	5.325	2.30309	3.275	4.325	5.712	92.82	0.4248	9.20201	230.966	791.372	40.75	50.0282	2.89993	0.362	4	4	3	3	4	3	3	3	3
1	47	63	1.75	110	70	60	20.5714	79	5.17	4.52547	0.937112	2.58598	1.49987	3.0256	3.01724	0.624795	1.72414	2.01724	3.927	98.124	0.3068	8.26899	170.105	653.25	28.38	13.1196	0.801191	-0.208	1	2	1	1	1	1	0	0	0
1	51	79	1.7	150	100	70	27.3356	86	5.06	5.6633	1.69358	3.90484	0.982674	4.68063	5.76316	1.72344	3.97368	4.76316	4.641	105.196	0.4366	8.83928	241.627	760.178	43.676	35.5651	2.06989	0.236	3	4	4	4	3	3	2	2	2
1	52	59	1.61	142	76	70	22.7615	74	4.62	4.39617	1.12905	2.5084	1.37057	3.0256	3.20755	0.823781	1.83019	2.20755	5.355	86.632	0.3481	8.34284	189.895	617.37	32.051	10.1615	0.940098	-0.086	1	2	1	1	1	1	1	1	1
1	48	66	1.75	114	82	76	21.551	81	5.115	6.46496	1.51293	3.77554	1.99121	4.47375	3.24675	0.759804	1.8961	2.24675	5.355	104.312	0.4602	8.73729	188.298	707.721	28.617	24.2068	0.976042	-0.119	3	2	1	1	2	2	1	1	1
1	52	75	1.67	126	80	65	26.8923	86	5.28	6.827	1.7839	4.91337	1.08611	5.74088	6.28571	1.64246	4.52381	5.28571	4.998	103.428	0.4366	8.9338	240.251	768.306	42.144	37.4619	1.99086	0.215	3	4	4	4	3	3	2	2	2
1	52	67	1.63	156	90	63	25.2174	81	5.665	3.8014	1.01615	1.91363	1.42229	2.37911	2.67273	0.714443	1.34545	1.67273	6.426	103.428	0.4366	8.44139	212.87	683.753	35.812	16.2583	0.845133	-0.149	2	2	2	2	1	2	1	1	0
1	50	60	1.65	170	100	69	22.0386	76	4.895	6.6977	1.49035	4.16343	1.86191	4.83579	3.59722	0.80044	2.23611	2.59722	6.426	105.196	0.5192	8.67829	191.257	659.55	29.564	16.3938	0.953869	-0.097	2	2	1	1	1	1	1	1	1
1	50	76	1.69	128	80	66	26.6097	86	4.95	5.45643	1.41131	3.82726	0.982674	4.47375	5.55263	1.4362	3.89474	4.55263	4.284	98.124	0.3776	8.63498	229.774	742.608	41.846	29.6376	1.75115	0.158	2	3	3	4	3	3	2	2	2
1	53	60	1.65	157	98	80	22.0386	79	5.39	6.77528	2.46133	4.18929	1.44815	5.32713	4.67857	1.69964	2.89286	3.67857	3.57	76.024	0.413	9.27632	204.437	732.829	32.993	34.4586	2.10537	0.23	4	4	2	2	3	2	2	2	2
1	51	79	1.72	128	86	84	26.7036	81	4.62	5.68916	2.30326	3.51694	1.11197	4.57719	5.11628	2.07133	3.16279	4.11628	4.284	91.052	0.4484	9.05579	241.822	733.519	42.017	36.8522	2.37406	0.316	3	4	4	4	3	2	3	3	2
1	51	69	1.68	200	120	80	24.4473	86	6.545	6.9563	2.23552	3.9307	1.99121	4.96509	3.49351	1.1227	1.97403	2.49351	4.641	91.052	0.4425	9.37424	229.175	806.185	34.209	46.9459	1.43388	0.049	4	3	3	2	4	4	1	1	1
1	51	68	1.7	140	90	90	23.5294	81	5.61	6.41324	2.39359	3.95656	1.37057	5.04267	4.67925	1.74642	2.88679	3.67925	4.998	93.704	0.3776	9.28841	218.551	752.361	35.741	38.2974	2.144	0.243	4	4	3	2	3	3	2	2	2
1	48	71	1.67	160	120	138	25.4581	89	7.755	9.12852	2.29197	6.41324	1.65503	7.47349	5.51562	1.38485	3.875	4.51562	3.927	79.56	0.354	9.56882	243.604	851.625	37.858	55.0073	1.79067	0.14	4	3	4	3	4	4	2	2	2
1	50	84	1.72	130	87	70	28.3937	89	7.37	3.62038	2.55165	1.62917	0.827515	2.79286	4.375	3.08351	1.96875	3.375	3.57	92.82	0.3422	9.62523	273.296	856.645	50.809	61.2397	3.75065	0.489	4	4	4	4	4	4	3	3	3
1	53	59	1.64	150	90	71	21.9363	76	5.28	5.48229	1.64841	2.97388	1.75847	3.72382	3.11765	0.937414	1.69118	2.11765	3.927	101.66	0.5841	8.85481	194.242	672.965	30.278	18.1326	1.11975	-0.027	3	2	2	1	2	1	1	1	1
1	50	61	1.69	124	82	86	21.3578	76	4.73	5.48229	1.50164	3.56866	1.21541	4.26687	4.51064	1.2355	2.93617	3.51064	2.856	100.776	0.2832	8.65155	184.778	657.518	31.735	16.518	1.49592	0.093	2	3	1	1	1	1	2	2	2
1	49	69	1.76	139	92	74	22.2753	84	6.545	6.46496	5.81461	4.08585	0.801655	5.6633	8.06452	7.25326	5.09677	7.06452	4.641	103.428	0.4366	10.3301	230.107	867.732	42.977	110.478	9.50128	0.86	4	4	3	4	4	4	3	3	3
1	45	59	1.66	142	99	50	21.4109	81	5.995	5.99948	1.24196	3.98242	1.44815	4.55133	4.14286	0.857615	2.75	3.14286	4.641	81.328	0.3717	8.69868	186.247	704.593	30.812	19.8713	1.10532	-0.066	2	2	1	1	2	2	1	1	1
1	48	75	1.7	148	90	85	25.9516	86	5.555	5.37885	3.27425	2.56012	1.31885	4.05999	4.07843	2.48265	1.94118	3.07843	6.426	97.24	0.354	9.59185	248.924	824.899	40.91	68.7592	3.06943	0.394	4	4	4	3	4	4	3	3	3
1	51	75	1.7	130	90	72	25.9516	84	4.675	8.63719	1.5468	6.54254	1.39643	7.24076	6.18519	1.10768	4.68519	5.18519	3.57	86.632	0.354	8.66949	224.987	728.237	37.256	29.3892	1.33763	0.045	2	3	3	3	3	2	1	1	1
1	43	89	1.73	136	80	80	29.737	91	5.115	7.47349	22.0504	4.78407	0.775795	6.6977	9.63333	28.4229	6.16667	8.63333	6.783	97.24	0.3304	11.4166	339.495	1038.91	67.05	573.309	34.4153	1.454	4	4	4	4	4	4	3	3	3
1	50	70	1.65	106	70	70	25.7117	81	4.07	6.41324	1.12905	4.49961	1.39643	5.01681	4.59259	0.808526	3.22222	3.59259	7.854	94.588	0.2891	8.21609	211.249	665.503	35.535	18.0648	0.946328	-0.092	1	2	2	2	2	1	1	1	1
1	46	59	1.64	111	83	72	21.9363	79	5.28	6.80114	1.50164	4.60305	1.49987	5.30127	4.53448	1.00118	3.06897	3.53448	4.284	83.98	0.3068	8.76155	192.196	692.162	31.252	21.0229	1.24312	0	3	3	1	1	2	2	1	1	1
1	49	67	1.67	140	80	70	24.0238	81	6.27	4.24101	1.10647	2.68942	1.03439	3.20662	4.1	1.06968	2.6	3.1	4.284	91.936	0.3481	8.62802	207.278	698.87	37.681	17.7035	1.29882	0.029	2	3	2	3	1	2	1	1	1
1	50	70	1.7	130	84	76	24.2215	76	5.005	5.84432	1.79519	3.95656	1.06025	4.78407	5.5122	1.69317	3.73171	4.5122	4.284	90.168	0.4071	8.88662	215.247	675.383	38.036	19.7471	1.92055	0.228	3	4	3	3	2	1	2	2	2
1	44	78	1.83	135	99	90	23.2912	89	4.95	6.64598	1.75003	3.87898	1.96535	4.68063	3.38158	0.890442	1.97368	2.38158	3.927	78.676	0.3363	8.85009	206.129	787.658	31.267	42.0007	1.20757	-0.051	3	2	2	1	3	3	1	1	1
1	47	75	1.65	158	100	64	27.5482	84	5.115	3.95656	2.91295	1.26713	1.34471	2.61184	2.94231	2.16623	0.942308	1.94231	7.14	104.312	0.2891	9.39241	258.744	788.963	42.503	55.3461	2.53009	0.336	4	4	4	4	4	3	3	3	3
1	49	89	1.75	180	100	104	29.0612	91	5.115	6.33566	3.05973	4.03413	0.905094	5.43057	7	3.38056	4.45714	6	3.927	87.516	0.2419	9.44157	274.384	859.183	50.061	79.5529	4.14842	0.529	4	4	4	4	4	4	3	3	3
1	53	54	1.65	117	85	98	19.8347	74	3.96	5.24955	3.30812	2.43082	1.29299	3.95656	4.06	2.5585	1.88	3.06	3.213	72.488	0.3422	9.26369	183.743	685.513	30.819	29.7731	3.12848	0.408	4	4	1	1	3	2	3	3	3
1	43	90	1.77	144	91	96	28.7274	94	4.565	6.64598	5.05815	4.24101	0.982674	5.6633	6.76316	5.14733	4.31579	5.76316	6.426	105.196	0.5192	9.83049	282.404	924.066	50.706	146.686	6.56844	0.712	4	4	4	4	4	4	3	3	3
1	48	68	1.75	119	93	90	22.2041	86	7.59	6.827	1.40002	4.99095	1.18955	5.63745	5.73913	1.17693	4.19565	4.73913	4.998	89.284	0.3658	9.05439	201.044	778.677	34.741	29.4005	1.581	0.072	3	3	2	2	3	3	2	2	2
1	47	70	1.72	130	80	66	23.6614	84	4.455	6.0512	4.42588	3.23248	0.801655	5.24955	7.54839	5.52093	4.03226	6.54839	2.856	81.328	0.3894	9.67256	228.867	812.495	43.525	84.0917	7.00812	0.742	4	4	3	4	4	4	3	3	3
1	52	79	1.72	140	80	60	26.7036	91	4.95	6.12878	2.90166	4.05999	0.775795	5.35299	7.9	3.74024	5.23333	6.9	4.641	96.356	0.4071	9.35574	249.832	851.372	47.729	75.4432	4.81613	0.573	4	4	4	4	4	4	3	3	3
1	50	62	1.65	123	78	56	22.7732	81	4.895	5.24955	1.01615	2.87044	1.91363	3.33592	2.74324	0.531005	1.5	1.74324	5.355	83.98	0.2655	8.2953	188.91	671.919	29.617	16.2583	0.663128	-0.276	1	1	1	1	1	1	0	0	0
[truncated: 6,197 more rows]
